# Supplementary material for: Asymmetric trehalose analogues to probe disaccharide processing pathways in mycobacteria
Source: Royal Society of Chemistry journal article supplement (doi:10.1039/d0ob00253d), 2020-01-01
Supplement: d0ob00253d2.xlsx [file d0ob00253d2.xlsx]

## Sheet: All proteins cytosolic fraction
Gene name	Product	Function	Main Protein ID	ORF Number Mtb	ORF Number bovis	Functional Category	Mol. weight [kDa]	Unique peptides	Unique sequence coverage [%]	Q-value	Score	LFQ intensity Trehalose 1	LFQ intensity Trehalose 2	LFQ intensity Trehalose 3	LFQ intensity Mannotrehalose 1	LFQ intensity Mannotrehalose 2	LFQ intensity Mannotrehalose 3	LFQ intensity Lactotrehalose 1	LFQ intensity Lactotrehalose 2	LFQ intensity Lactotrehalose 3	LFQ intensity Control 1	LFQ intensity Control 2	LFQ intensity Control 3	Trehalose: -Log(P-value)	Trehalose: Difference	Mannotrehalose: -Log(P-value)	Mannotrehalose: Difference	Lactotrehalose: -Log(P-value)	Lactotrehalose: Difference
yidC	Probable conserved transmembrane protein	Unknown	P9WIT5	Rv3921c	Mb3952c	cell wall and cell processes	40.916	7	32.5	0	89.588	24.1821	24.5525	24.8391	24.4159	23.74	25.5317	25.2254	24.7985	24.7821	22.958	25.3556	25.0154	0.0357352	0.0815722	0.0447125	0.119538	0.256585	0.492299
dnaN	DNA polymerase III (beta chain) DnaN (DNA nucleotidyltransferase)	DNA polymerase III is a complex, multichain enzyme responsible for most of the replicative synthesis in bacteria. This DNA polymerase also exhibits 3' to 5' exonuclease activity. The beta chain is required for initiation of replication once it is clamped onto DNA, it slides freely (bidirectional and ATP-independent) along duplex DNA [catalytic activity: N deoxynucleoside triphosphate = N diphosph…	P9WNU1	Rv0002	Mb0002	information pathways	42.055	20	57.2	0	180.48	31.0689	31.1699	31.1218	31.1368	31.1872	30.8931	30.8772	30.8527	30.8208	31.2385	30.8966	31.0266	0.253589	0.0663147	0.0468949	0.0184701	0.943715	-0.203696
gyrB	DNA gyrase (subunit B) GyrB (DNA topoisomerase (ATP-hydrolysing)) (DNA topoisomerase II) (type II DNA topoisomerase)	DNA gyrase negatively supercoils closed circular double-stranded DNA in an ATP-dependent manner and also catalyzes the interconversion of other topological isomers of double-stranded DNA rings, including catenanes and knotted rings [catalytic activity: ATP-dependent breakage, passage and rejoining of double-stranded DNA].	P9WG45	Rv0005	Mb0005	information pathways	74.09	19	36.7	0	192.01	26.8579	25.6739	25.5349	26.1505	25.1986	26.0521	25.8239	25.7015	25.936	25.7986	25.7211	26.1424	0.111202	0.134891	0.094468	-0.0869452	0.173361	-0.0668831
Rv0007	Possible conserved membrane protein	Unknown	P9WMA7	Rv0007	Mb0007	cell wall and cell processes	31.073	10	45.4	0	152.44	25.2805	25.3775	25.2372	24.7807	25.8765	24.683	24.7053	24.7857	23.6609	26.2606	25.4278	25.604	0.841869	-0.465708	0.639855	-0.650724	1.45016	-1.38012
Rv3920c	Conserved protein similar to jag protein	Unknown	O53598	Rv3920c	Mb3951c	conserved hypotheticals	20.558	19	73.8	0	323.31	29.8092	29.7886	29.9212	30.1732	30.6569	29.3867	29.7177	30.1905	29.5534	29.8278	29.1731	29.2236	0.941693	0.431513	0.712655	0.664114	0.657115	0.412387
dnaA	Chromosomal replication initiator protein DnaA	Plays an important role in the initiation and regulation of chromosomal replication. Binds to the origin of replication; it binds specifically double-stranded DNA at a 9 bp consensus (DNAA box): 5'-TTATC(C/A)A(C/A)A-3'. DNAA binds to ATP and to acidic phospholipids. DNAA protein binds the origin of replication (oriC), ATP and ADP, and exhibited weak ATPase activity.	P9WNW3	Rv0001	Mb0001	information pathways	56.585	6	15.2	0	13.862	25.4921	24.7968	23.8013	23.7753	24.2004	23.9283	24.486	23.3051	22.6959	24.6315	23.587	23.9054	0.492773	0.655456	0.077432	-0.0732657	0.375337	-0.545614
gyrA	DNA gyrase (subunit A) GyrA (DNA topoisomerase (ATP-hydrolysing)) (DNA topoisomerase II) (type II DNA topoisomerase)	DNA gyrase negatively supercoils closed circular double-stranded DNA in an ATP-dependent manner and also catalyzes the interconversion of other topological isomers of double-stranded DNA rings, including catenanes and knotted rings [catalytic activity: ATP-dependent breakage, passage and rejoining of double-stranded DNA].	P9WG47	Rv0006	Mb0006	information pathways	92.344	32	50.6	0	182.19	28.1942	26.3417	26.0861	27.0726	25.6611	27.8021	27.2129	25.7457	26.3416	26.6538	26.4451	27.623	0.0145431	-0.033247	0.0287104	-0.0619882	0.351806	-0.473852
cwsA	Possible membrane protein	Unknown	P9WJF3	Rv0008c	Mb0008c	cell wall and cell processes	15.681	3	44.8	0	57.085	24.7409	23.4793	24.3139	23.2732	24.8924	24.175	23.6203	24.338	24.1939	23.3047	23.3255	22.6559	1.18153	1.08267	0.919026	1.01815	1.43154	0.955399
ppiA	Probable iron-regulated peptidyl-prolyl cis-trans isomerase A PpiA (PPIase A) (rotamase A)	PPIases accelerate the folding of proteins [catalytic activity: cis-trans isomerization of proline imidic peptide bonds in oligopeptides].	P9WHW3	Rv0009	Mb0009	information pathways	19.239	10	78	0	323.31	31.4143	31.4845	31.2572	31.3694	31.6152	31.2982	31.5894	31.5133	31.328	31.6587	31.1181	31.2469	0.0889203	0.044096	0.172773	0.0863609	0.306089	0.135681
crgA	Probable conserved transmembrane protein	Unknown	P9WP57	Rv0011c	Mb0011c	cell wall and cell processes	10.43	3	12.9	0	86.785	23.7948	24.024	24.4685	23.5304	24.7651	23.8018	23.5383	24.8481	23.9282	23.8656	23.755	22.6566	0.70514	0.670017	0.491673	0.606709	0.54892	0.679145
trpG	Possible anthranilate synthase component II TrpG (glutamine amidotransferase)	Possibly involved in biosynthesis of tryptophan (at the first step). Supposed tetramer of two components I and two components II: component I (Rv1609|trpE) catalyzes the formation of anthranilate using ammonia rather than glutamine, whereas component II (Rv0013|trpG) provides glutamine amidotransferase activity. Possibly participates in the tryptophan-dependent indole-3-acetic acid production [ca…	P9WN35	Rv0013	Mb0013	intermediary metabolism and respiration	24.627	7	46.1	0	6.4506	23.083	23.8322	23.975	24.4319	24.6387	23.2037	23.9314	23.8686	24.8375	24.8789	24.6633	25.4342	1.71465	-1.36205	0.82969	-0.900685	0.939139	-0.779607
gpm2	Possible phosphoglycerate mutase Gpm2 (phosphoglyceromutase) (PGAM) (BPG-dependent PGAM)	Involved in glycolysis [catalytic activity: 1,3-diphosphoglycerate + 3-phosphoglycerate = 2,3-diphosphoglycerate + 3-phosphoglycerate].	Q6MWZ7	Rv3214	Mb3240	intermediary metabolism and respiration	21.949	11	87.7	0	323.31	29.6121	29.6432	29.7121	29.8272	30.3246	29.5041	29.5564	29.6616	29.4843	30.0738	29.3865	29.6217	0.0652845	-0.0382061	0.241489	0.191291	0.23968	-0.126599
Rv3218	Conserved protein	Function unknown	O05848	Rv3218	Mb3244	conserved hypotheticals	34.474	6	30.2	0	65.185	22.6711	23.5058	22.5163	25.2087	24.1555	23.9174	24.8203	23.7249	24.0783	24.3979	25.0219	23.8397	1.52931	-1.52211	0.00462275	0.0073897	0.170527	-0.211971
rshA	Anti-sigma factor RshA	Binds sigma factor sigh and inhibits it. Probably involved in survival following heat shock and oxidative stress.	P9WJ69	Rv3221A	Mb3248c	information pathways	11.29	8	37.6	0	18.024	27.9958	28.3244	28.2379	28.3558	28.9331	27.9291	27.9362	28.083	28.0736	28.5516	27.3369	28.1035	0.19713	0.188714	0.373367	0.4087	0.0316451	0.0335884
Rv3224	Possible iron-regulated short-chain dehydrogenase/reductase	Function unknown; probably involved in cellular metabolism.	O05842	Rv3224	Mb3251	intermediary metabolism and respiration	29.814	21	67	0	323.31	31.3771	30.8442	30.7517	30.8289	30.2577	31.4525	30.9589	30.6641	30.9238	30.502	31.0614	31.1948	0.0882793	0.0715739	0.0626632	-0.0730584	0.110033	-0.0704689
aroA	3-phosphoshikimate 1-carboxyvinyltransferase AroA (5-enolpyruvylshikimate-3-phosphate synthase) (EPSP synthase) (EPSPS)	Involved in the biosynthesis of chorismate within the biosynthesis of aromatic amino acids (the shikimate pathway). Acts in the sixth step of this pathway. [catalytic activity: phosphoenolpyruvate + 3-phosphoshikimate = orthophosphate + O(5)-(1-carboxyvinyl)-3-phosphoshikimate].	P9WPY5	Rv3227	Mb3256	intermediary metabolism and respiration	46.425	21	62.2	0	174.01	28.6771	28.2564	28.5915	28.585	28.3695	28.8788	28.7057	28.2171	28.5078	29.0263	28.3942	28.5457	0.254201	-0.147049	0.0639359	-0.0442969	0.306142	-0.17853
lrpA	Probable transcriptional regulatory protein LrpA (Lrp/AsnC-family)	Involved in transcriptional mechanism.	I6YBQ3	Rv3291c	Mb3319c	regulatory proteins	16.538	9	64.7	0	65.807	27.2033	27.2753	26.8311	27.1173	26.358	26.9534	27.2953	27.3063	27.0292	26.7446	27.2532	27.0583	0.156557	0.0845572	0.311462	-0.209109	0.479012	0.191571
Rv3295	Probable transcriptional regulatory protein (probably TetR-family)	Involved in transcriptional mechanism.	P96900	Rv3295	Mb3323	regulatory proteins	24.805	17	82.4	0	69.528	25.0198	25.1164	23.3163	24.5302	23.9377	24.0372	24.9934	24.7289	25.5628	23.3849	25.084	26.0372	0.133146	-0.351196	0.346998	-0.666949	0.116002	0.259704
lpqC	Possible esterase lipoprotein LpqC	Function unknown; lipolytic enzyme involved in cellular metabolism.	P96903	Rv3298c	Mb3326c	cell wall and cell processes	31.368	6	23.7	0	85.153	23.5513	24.278	24.1287	23.8522	24.7196	24.4087	23.0747	24.6309	25.1576	25.1255	24.5288	25.0832	1.46553	-0.926545	0.855073	-0.5857	0.404932	-0.62478
atsB	Probable arylsulfatase AtsB (aryl-sulfate sulphohydrolase) (sulfatase)	Generates sulfate and phenol from phenol sulfate [catalytic activity: a phenol sulfate + H(2)O = a phenol + sulfate].	O65931	Rv3299c	Mb3327c	intermediary metabolism and respiration	105.68	17	27.1	0	52.941	25.344	25.6643	26.1979	25.4897	22.5866	25.5857	26.0417	25.7299	26.2961	24.3725	25.174	25.5824	0.730974	0.692457	0.177449	-0.48897	1.17714	0.97963
phoU1	Probable phosphate-transport system transcriptional regulatory protein PhoU homolog 1 PhoY1	Involved in transcriptional regulation of active transport of inorganic phosphate across the membrane.	P9WI97	Rv3301c	Mb3329c	cell wall and cell processes	24.842	24	85.5	0	239.93	23.5963	24.0437	23.3969	24.6154	22.9598	25.1126	24.9244	23.7163	24.6148	23.7297	24.6883	25.5573	0.806985	-0.979478	0.196892	-0.429173	0.138584	-0.239969
glpD2	Probable glycerol-3-phosphate dehydrogenase GlpD2	Involved in aerobic respiration and oxidation of glycerol. Reduces an acceptor and generates glycerone phosphate from Sn-glycerol 3-phosphate. Possibly play a role in metabolism of riboflavin, FAD,FMN [catalytic activity: SN-glycerol 3-phosphate + acceptor = glycerone phosphate + reduced acceptor].	P9WN79	Rv3302c	Mb3330c	intermediary metabolism and respiration	62.777	26	58.3	0	323.31	29.152	28.9706	28.8605	28.7744	27.3173	29.1629	29.1667	28.7914	29.0369	28.3579	29.0541	29.1729	0.189444	0.132701	0.290911	-0.443467	0.188794	0.136726
sigH	Alternative RNA polymerase sigma-E factor (sigma-24) SigH (RPOE)	Alternative sigma factor that plays a role in the oxidative-stress response (regulation of thioredoxin recycling). The sigma factor is an initiation factor that promotes attachment of the RNA polymerase to specific initiation sites and then is released. This sigma factor is involved in heat shock and oxidative stress response; it is believed to control protein processing in the extracytoplasmic c…	P9WGH9	Rv3223c	Mb3250c	information pathways	24.225	18	83.3	0	323.31	30.1536	30.0648	30.3891	30.8361	31.1299	30.5255	30.5964	30.684	30.403	30.9609	30.3396	30.5152	0.900128	-0.40273	0.370935	0.225273	0.0765242	-0.0440922
Rv3292	Conserved hypothetical protein	Function unknown	P9WL01	Rv3292	Mb3320	conserved hypotheticals	45.331	27	70.6	0	272.7	29.3969	29.2019	29.5895	28.812	28.9198	29.5509	29.8918	29.6807	29.5052	29.8367	29.2927	29.6171	0.407844	-0.186056	0.807686	-0.487908	0.222682	0.11041
pcd	Probable piperideine-6-carboxilic acid dehydrogenase Pcd (piperideine-6-carboxylate dehydrogenase)	Involved in L-alpha-aminoadipic acid (L-AAA) biosynthesis (in the second step; the first step is promoted by lat enzyme.	L7N650	Rv3293	Mb3321	intermediary metabolism and respiration	51.39	19	52.2	0	235.2	29.6437	29.4897	29.6147	29.5458	27.939	29.4914	29.6213	29.7394	29.6814	28.6849	29.6353	29.5938	0.371092	0.278042	0.196521	-0.312576	0.530868	0.376022
trxB2	Probable thioredoxin reductase TrxB2 (TRXR) (TR)	Enzyme that catalyse the reduction of disulphides by pyridine nucleotides through an enzyme disulphide and a flavin. Seems regulated by sigh (Rv3223c product). [catalytic activity: NADPH + oxidized thioredoxin = NADP(+) + reduced thioredoxin].	A0A0G2Q9N7	Rv3913	Mb3944	Intermediary metabolism and respiration	35.585	1	9	0	321.29	29.7051	29.8492	29.9839	29.5797	28.5889	29.9045	29.7186	29.5248	29.6724	29.7516	29.3807	29.7554	0.663616	0.216793	0.260904	-0.271537	0.0227653	0.00935872
trxA	Thioredoxin TrxC (TRX) (MPT46)	Thioredoxin participates in various redox reactions through the reversible oxidation of its active center dithiol, to a disulfide, & catalyzes dithiol-disulfide exchange reactions. Forms together with thioredoxin reductase and NADPH a redox active system which donates electrons to a wide variety of different metabolic process. Seems regulated by sigh (Rv3223c product).	P9WG67	Rv3914	Mb3945	intermediary metabolism and respiration	12.544	7	74.1	0	135.37	29.5411	29.9024	29.6672	29.8588	30.5375	29.2716	29.3906	29.5097	29.5936	29.9742	29.2918	29.473	0.208609	0.123887	0.300338	0.309625	0.14261	-0.0816943
fhaB	Conserved protein with FHA domain, FhaB	Signal transduction	P9WJB5	Rv0019c	Mb0019c	regulatory proteins	17.152	8	57.4	0	71.485	26.3525	26.9956	26.6057	23.9537	23.6872	26.7524	26.8288	26.2786	26.895	26.5572	26.0995	26.9776	0.123567	0.106489	0.79708	-1.74703	0.142089	0.122709
ino1	myo-inositol-1-phosphate synthase Ino1 (inositol 1-phosphate synthetase) (D-glucose 6-phosphate cycloaldolase) (glucose 6-phosphate cyclase) (glucocycloaldolase)	Involved in phosphatidylinositol (PI) biosynthetic pathway [catalytic activity: D-glucose 6-phosphate = 1L-myo-inositol 1-phosphate].	P9WKI1	Rv0046c	Mb0047c	intermediary metabolism and respiration	39.982	31	75.7	0	323.31	32.103	32.2299	32.0109	32.125	32.2943	31.9284	31.7504	31.8347	32.0061	32.2704	31.7758	31.8019	0.405583	0.165251	0.361103	0.16656	0.183966	-0.0856024
Rv0051	Probable conserved transmembrane protein	Unknown	P71708	Rv0051	Mb0052	cell wall and cell processes	61.24	8	22.5	0	38.009	23.6583	23.5043	24.4765	24.5216	24.3214	24.4528	23.9363	24.2421	23.3892	25.498	23.4966	23.4438	0.13243	-0.266392	0.157815	0.285778	0.150134	-0.29024
sdaA	Probable L-serine dehydratase SdaA (L-serine deaminase) (SDH) (L-SD)	Involved in gluconeogenesis from serine [catalytic activity: L-serine + H2O = pyruvate + NH3 + H2O].	P9WGT5	Rv0069c	Mb0070c	intermediary metabolism and respiration	48.576	10	30.6	0	28.086	26.0452	26.0121	26.0112	24.1774	26.0285	25.9327	25.9168	26.0459	25.8167	26.6608	26.1594	25.9438	0.472438	-0.231849	0.615992	-0.875181	0.669197	-0.328259
Rv0074	Conserved protein	Function unknown	O53619	Rv0074	Mb0076	conserved hypotheticals	42.791	9	32.1	0	29.997	25.1094	22.9133	25.0874	24.3763	24.5929	24.9986	25.3526	25.147	25.5712	25.5111	23.2368	25.0666	0.0824002	-0.234754	0.0237492	0.0511017	0.459474	0.752106
hycE	Possible formate hydrogenase HycE (FHL)	Involved in hydrogen metabolism; FHL pathway.	Q10884	Rv0087	Mb0090	intermediary metabolism and respiration	53.503	7	27.8	0	20.088	23.5419	24.3692	23.0782	23.452	23.8626	24.2969	23.9328	22.9025	24.4972	23.8811	22.7427	24.1118	0.0512672	0.0845865	0.234952	0.292004	0.114678	0.199004
gca	Possible GDP-mannose 4,6-dehydratase Gca (GDP-D-mannose dehydratase)	Possibly involved in synthesis of a-band common antigen lipopolysaccharide. First of the three steps in the biosynthesis of GDP-fucose from GDP-mannose [catalytic activity: GDP-mannose = GDP-4-dehydro-6-deoxy-D-mannose + H2O].	O53634	Rv0112	Mb0116	cell wall and cell processes	35.28	7	26.1	0	33.273	24.1341	23.4038	24.0721	23.2153	23.7517	23.4752	24.3373	22.4844	24.3193	24.8212	24.415	23.2405	0.212057	-0.288887	0.61012	-0.678151	0.224065	-0.445215
oxcA	Probable oxalyl-CoA decarboxylase OxcA	Involved in catabolism of oxalic acid [catalytic activity: oxalyl-CoA = formyl-CoA + CO2].	O53639	Rv0118c	Mb0122c	intermediary metabolism and respiration	61.141	18	38	0	104.36	26.7453	27.045	26.4684	26.1036	26.4055	26.2226	26.1476	25.4975	26.5973	26.7948	26.6003	26.6859	0.123259	0.0592607	1.90261	-0.449758	0.880531	-0.612839
fbpC	Secreted antigen 85-C FbpC (85C) (antigen 85 complex C) (AG58C) (mycolyl transferase 85C) (fibronectin-binding protein C)	Proteins of the antigen 85 complex are responsible for the high affinity of mycobacteria to fibronectin. Possesses a mycolyltransferase activity required for the biogenesis of trehalose dimycolate (cord factor), a dominant structure necessary for maintaining cell wall integrity.	P9WQN9	Rv0129c	Mb0134c	lipid metabolism	36.771	13	45.6	0	228.94	25.9745	25.2398	27.4136	26.8527	27.7647	26.9596	27.1536	27.1268	27.4297	28.0563	26.1641	26.8521	0.409742	-0.814873	0.0965279	0.168156	0.140143	0.212557
Rv0141c	Unknown protein	Unknown	P96818	Rv0141c	Mb0146c	conserved hypotheticals	15.49	5	40.4	0	16.449	24.8092	24.6288	23.8148	23.6376	24.2753	24.9867	23.7673	24.2802	24.3397	23.3135	23.8725	24.7498	0.352206	0.438991	0.218986	0.321276	0.120429	0.15049
Rv0148	Probable short-chain type dehydrogenase/reductase	Function unknown; possibly involved in cellular metabolism.	P96825	Rv0148	Mb0153	intermediary metabolism and respiration	29.778	17	91.3	0	323.31	32.0946	32.0642	32.2632	32.171	32.3712	32.3194	32.3436	32.1882	32.2297	32.3074	32.0975	32.1696	0.227988	-0.0508397	0.484181	0.0957311	0.333258	0.0623601
Rv0158	Probable transcriptional regulatory protein (possibly TetR-family)	Involved in transcriptional mechanism.	O53641	Rv0158	Mb0163	regulatory proteins	24.128	13	71	0	36.564	24.3591	23.2116	23.8357	24.2266	24.1328	23.0494	23.156	21.1672	23.653	23.2925	23.4227	24.4801	0.0480966	0.0703742	0.0456522	0.0711733	0.562012	-1.07306
lprK	Possible Mce-family lipoprotein LprK (Mce-family lipoprotein Mce1E)	Unknown, but thought to be involved in host cell invasion.	O07417	Rv0173	Mb0179	cell wall and cell processes	42.239	14	48.7	0	323.31	22.6232	23.8753	22.3366	24.2454	25.963	24.239	23.7321	23.4767	23.3395	26.0133	24.4546	23.1561	0.772833	-1.59627	0.0977727	0.27446	0.543196	-1.02522
Rv0178	Probable conserved Mce associated membrane protein	Unknown	O07422	Rv0178	Mb0184	cell wall and cell processes	25.911	11	61.1	0	323.31	26.6102	26.9317	26.9074	26.9001	26.4483	26.4292	26.4398	26.9714	26.6063	26.4439	26.6902	26.6891	0.724169	0.208685	0.0292679	-0.0151723	0.134839	0.0647558
Rv0183	Possible lysophospholipase	Function unknown; probably involved in cellular metabolism.	O07427	Rv0183	Mb0189	intermediary metabolism and respiration	30.261	18	67.7	0	323.31	26.7591	26.9084	26.7515	26.8412	27.1536	28.1127	27.572	25.7218	27.0667	27.902	27.379	27.2365	1.54509	-0.699507	0.11468	-0.136669	0.53977	-0.719009
Rv0199	Probable conserved membrane protein	Unknown	O53650	Rv0199	Mb0205	cell wall and cell processes	23.52	9	70.3	0	257.56	24.118	23.8261	23.0049	23.6492	24.2576	23.867	23.6605	22.741	23.8415	24.5954	23.5515	23.9651	0.358299	-0.38766	0.116529	-0.112745	0.612875	-0.623015
Rv0216	Double hotdog hydratase	Unknown	I6Y340	Rv0216	Mb0222	intermediary metabolism and respiration	35.788	27	83.1	0	323.31	31.9475	32.1887	32.23	32.1385	32.5136	32.1373	32.1072	32.1074	32.1275	32.7159	31.9335	32.2402	0.288856	-0.174458	0.0438614	-0.0333881	0.329938	-0.182479
Rv0227c	Probable conserved membrane protein	Unknown	P96409	Rv0227c	Mb0232c	cell wall and cell processes	45.527	34	67.5	0	323.31	23.7786	21.9755	22.1676	24.6617	25.6413	25.1457	24.3307	25.9015	24.3381	26.2755	24.5431	24.9012	1.54013	-2.59939	0.0519016	-0.0903873	0.198495	-0.383165
Rv0232	Probable transcriptional regulatory protein (probably TetR/AcrR-family)	Involved in transcriptional mechanism.	P96415	Rv0232	Mb0237	regulatory proteins	25.44	6	42.4	0	51.352	24.1754	23.9987	24.8013	23.1364	23.7729	23.9545	24.4784	23.9756	24.3429	23.8612	23.413	23.9091	0.963735	0.597375	0.133407	-0.106517	1.16012	0.537863
Rv0238	Possible transcriptional regulatory protein (probably TetR-family)	Possibly involved in transcriptional mechanism.	O53661	Rv0238	Mb0244	regulatory proteins	22.496	7	44.1	0	70.811	23.0899	24.0062	23.0691	24.1122	24.4776	24.249	23.4306	23.5054	24.3745	24.0425	24.3693	23.3254	0.528477	-0.523984	0.490487	0.367203	0.119974	-0.142218
fadA2	Probable acetyl-CoA acyltransferase FadA2 (3-ketoacyl-CoA thiolase) (beta-ketothiolase)	Function unknown, but involved in lipid degradation [catalytic activity: acyl-CoA + acetyl-CoA = CoA + 3-oxoacyl-CoA].	O86361	Rv0243	Mb0249	lipid metabolism	46.107	30	62.5	0	323.31	30.0268	30.1478	30.0362	30.2566	30.6278	30.8891	30.1685	30.0077	30.1368	31.1771	30.2979	30.6006	1.12095	-0.621584	0.115573	-0.100662	1.05156	-0.587526
sdhA	Probable succinate dehydrogenase [iron-sulfur subunit] (succinic dehydrogenase)	Involved in interconversion of fumarate and succinate (aerobic respiration) [catalytic activity: succinate + acceptor = fumarate + reduced acceptor].	O53670	Rv0248c	Mb0254c	intermediary metabolism and respiration	70.68	55	72.3	0	323.31	32.6196	32.5818	32.5512	32.2904	32.977	32.3635	32.3372	32.4413	32.6191	33.065	32.6631	32.7143	0.834269	-0.229933	0.464762	-0.270536	1.0861	-0.348242
rodA	Probable cell division protein RodA	This is a septum-peptidoglycan biosynthetic protein, involved in cell wall formation. Plays a role in the stabilization of the FTSZ ring during cell division.	P9WN99	Rv0017c	Mb0017c	cell wall and cell processes	50.61	7	13.2	0	64.491	23.7801	24.6061	22.7874	24.0029	23.8813	24.2825	24.5623	22.547	22.8921	23.4837	23.0814	23.0737	0.398562	0.511548	2.02412	0.842629	0.066143	0.120853
Rv0023	Possible transcriptional regulatory protein	Possibly involved in transcriptional mechanism.	P9WMI3	Rv0023	Mb0023	regulatory proteins	27.187	9	46.9	0	27.891	23.2064	23.8407	23.9284	23.1902	24.2677	23.539	24.1167	23.8869	24.6846	25.0791	24.1859	24.0957	0.96049	-0.795089	0.817343	-0.787938	0.222438	-0.224179
eccB3	ESX conserved component EccB3. ESX-3 type VII secretion system protein. Possible membrane protein.	Unknown	P9WNR3	Rv0283	Mb0291	cell wall and cell processes	55.942	21	49.1	0	135.3	26.1905	25.096	25.607	24.1527	24.7174	26.3839	25.872	25.6865	25.5563	23.429	25.2814	26.4242	0.250302	0.58625	0.0119396	0.0397867	0.306471	0.660048
Rv0314c	Possible conserved membrane protein	Unknown	O07241	Rv0314c	Mb0322c	cell wall and cell processes	22.503	4	34.5	0	53.876	23.3962	24.3052	25.3768	23.4669	22.8304	23.4811	24.9198	24.5315	24.2537	23.4805	22.8987	23.6525	0.757722	1.01544	0.0964948	-0.0844415	1.82695	1.22443
Rv0078	Probable transcriptional regulatory protein	Possibly involved in transcriptional mechanism.	O53623	Rv0078	Mb0080	regulatory proteins	21.91	10	60.2	0	235.48	23.6515	22.4278	23.4895	23.5808	23.9433	25.2511	23.7666	22.9575	22.826	24.8737	24.2474	23.5184	0.868651	-1.02361	0.0235739	0.0451908	0.985757	-1.0298
Rv0081	Probable transcriptional regulatory protein	Involved in transcriptional mechanism.	P9WMI7	Rv0081	Mb0084	regulatory proteins	12.356	8	71.1	0	140.29	27.3754	27.5556	27.2008	27.1586	27.8551	27.0213	27.1645	26.948	27.1831	27.9324	27.0744	27.4217	0.135359	-0.0988661	0.134774	-0.131152	0.656451	-0.377583
Rv0332	Conserved protein	Function unknown	O07256	Rv0332	Mb0339	conserved hypotheticals	28.548	15	70.1	0	323.31	28.7234	28.378	28.5906	28.569	23.2161	28.6576	28.8021	28.8929	28.7492	23.4837	28.6253	29.0155	0.354745	1.52249	0.0302093	-0.227294	0.424518	1.77322
Rv0338c	Probable iron-sulfur-binding reductase	Function unknown; probably involved in cellular metabolism.	O33268	Rv0338c	Mb0345c	intermediary metabolism and respiration	95.414	23	32.5	0	323.31	28.1756	27.9744	28.0417	27.1414	27.5928	28.4175	27.8924	27.9785	28.2059	28.5267	28.6807	28.4332	2.17926	-0.482959	1.02366	-0.829627	1.9366	-0.521243
mtnN	Probable bifunctional MTA/SAH nucleosidase Mtn: 5'-methylthioadenosine nucleosidase (methylthioadenosine methylthioribohydrolase) + S-adenosylhomocysteine nucleosidase (S-adenosyl-L-homocysteine homocysteinylribohydrolase)	Responsible for cleavage of the glycosidic bond in both 5'-methylthioadenosine (MTA) and S-adenosylhomocysteine (SAH) [catalytic activity 1: methylthioadenosine + H2O = adenine + 5-methylthio-D-ribose] [catalytic activity 2: S-adenosyl-L-homocysteine + H2O = adenine + S-D-ribosyl-L-homocysteine].	P9WJM3	Rv0091	Mb0094	intermediary metabolism and respiration	27.339	10	47.8	0	20.532	25.6329	24.8717	25.3538	24.3436	23.0003	24.7833	24.9287	23.4998	25.4459	23.3872	24.7594	25.8234	0.354059	0.629464	0.27883	-0.614268	0.0114886	-0.031833
Rv0356c	Conserved protein	Function unknown	O06307	Rv0356c	Mb0363c	conserved hypotheticals	22.911	7	43	0	30.11	26.6298	26.3127	26.3189	26.4408	24.2234	26.271	26.7249	26.4963	26.5727	26.8935	26.6262	26.9102	1.3091	-0.389494	0.744135	-1.16492	0.865395	-0.212002
Rv0383c	Possible conserved secreted protein	Unknown	O53718	Rv0383c	Mb0390c	cell wall and cell processes	31.801	17	61.6	0	186.13	22.216	24.3862	24.0897	24.1283	23.8141	25.3139	23.0013	25.233	22.8901	25.1248	24.0103	24.6773	0.621397	-1.04018	0.1208	-0.185366	0.467772	-0.895987
PurT	Probable phosphoribosylglycinamide formyltransferase 2 PurT (GART 2) (gar transformylase 2) (5'-phosphoribosylglycinamide transformylase 2) (formate-dependent gar transformylase)	Involved in third step (first of two transformylation reactions) in de novo purine biosynthesis. This is an alternative enzyme to the PURN|Rv0956 gar transformylase (5'-phosphoribosylglycinamide formyltransferase). Catalyzes two reactions: the first one is the production of beta-formyl glycinamide ribonucleotide (gar) from formate, ATP and beta gar; the second, a side reaction, is the production …	A0A0H3M1F0	Rv0389	Mb0395	Intermediary metabolism and respiration	43.593	2	7.9	0	187.95	27.0177	26.8916	27.127	27.2328	24.5362	26.8795	27.0669	27.2993	26.9747	26.3545	27.085	27.2048	0.181313	0.130646	0.305492	-0.665283	0.339486	0.232187
Rv0394c	Possible secreted protein	Unknown	P95202	Rv0394c	Mb0400c	cell wall and cell processes	25.278	5	32.2	0	172.33	25.498	24.4148	23.8243	23.4482	25.4831	25.9564	25.653	23.0787	24.8187	23.4953	24.9092	25.4418	0.0158773	-0.0363909	0.132534	0.347114	0.0349325	-0.0986462
Rv0147	Probable aldehyde dehydrogenase (NAD+) dependent	Function unknown; probably involved in cellular metabolism [catalytic activity: an aldehyde + NAD+ + H2O = an acid + NADH].	P96824	Rv0147	Mb0152	intermediary metabolism and respiration	55.034	27	67	0	323.31	29.1655	28.3981	28.7697	27.9991	25.9173	28.2949	28.9437	29.0976	28.8274	29.0208	29.5587	29.47	0.966807	-0.572098	1.19359	-1.94611	1.0038	-0.393627
lpqK	Possible conserved lipoprotein LpqK	Unknown	P95207	Rv0399c	Mb0405c	cell wall and cell processes	44.308	8	23.2	0	7.8464	21.5076	24.288	24.6411	24.5287	23.5562	23.9928	22.9269	23.0665	23.3525	22.7707	24.7337	23.936	0.105493	-0.334534	0.122068	0.212449	0.526336	-0.698168
fgd1	F420-dependent glucose-6-phosphate dehydrogenase Fgd1	Catalyzes oxidation of glucose-6-phosphate to 6-phosphogluconolactone using coenzyme F420 (an *-hydroxy-5-deazaflavin derivative) as the electron acceptor.	P9WNE1	Rv0407	Mb0415	intermediary metabolism and respiration	36.988	24	88.7	0	323.31	25.464	24.0116	24.3456	24.2348	24.1152	26.5683	24.575	24.6516	23.3161	24.4462	26.8582	25.2932	0.483763	-0.925437	0.202496	-0.559734	0.749125	-1.35161
pntB	Probable NAD(P) transhydrogenase (subunit beta) PntB [integral membrane protein] (pyridine nucleotide transhydrogenase subunit beta) (nicotinamide nucleotide transhydrogenase subunit beta)	The transhydrogenation between NADH and NADP is coupled to respiration and ATP hydrolysis and functions as a proton pump across the membrane [catalytic activity: NADPH + NAD+ = NADP+ + NADH].	P96834	Rv0157	Mb0162	intermediary metabolism and respiration	48.858	14	43.2	0	323.31	25.3901	24.298	26.4133	25.6373	26.0355	24.3907	24.7987	25.6382	24.8504	26.1015	25.9372	26.1668	0.498345	-0.701394	0.644822	-0.714014	1.59318	-0.972727
Rv0412c	Possible conserved membrane protein	Unknown	P96258	Rv0412c	Mb0420c	cell wall and cell processes	47.163	16	37.8	0	94.787	25.2008	23.9303	24.5049	23.8365	24.5719	25.0746	23.5937	23.6549	24.1042	24.9226	23.3947	25.189	0.021545	0.0432027	0.00382515	-0.00777117	0.545506	-0.71782
adhE1	Probable zinc-type alcohol dehydrogenase (E subunit) AdhE1	Dehydrogeneses a alcohol (OXIDO-reduction) [catalytic activity: an alcohol + NAD+ = an aldehyde or ketone + NADH].	L7N6B3	Rv0162c	Mb0167c	intermediary metabolism and respiration	39.384	14	56.9	0	57.447	24.4754	24.8908	23.9792	24.4406	22.1094	23.3579	23.7709	24.8424	25.3236	25.2714	24.9415	24.2274	0.377871	-0.364948	0.954756	-1.51077	0.109778	-0.167754
lpqM	Possible lipoprotein peptidase LpqM	Function unknown; possibly hydrolyzes peptides and/or proteins.	P96265	Rv0419	Mb0427	cell wall and cell processes	53.009	15	49.8	0	153.16	22.9062	24.246	25.0244	22.3254	24.1546	23.534	25.0737	23.1622	24.4134	23.5256	22.3643	23.4414	0.585546	0.948437	0.127507	0.227539	0.754419	1.10601
yrbE1A;yrbE2A	Conserved integral membrane protein YrbE1A;Conserved hypothetical integral membrane protein YrbE2A	Unknown	O07412	Rv0167;Rv0587	Mb0173;Mb0602	Virulence, detoxification, adaptation	27.775	4	18.5	0	63.861	24.2578	24.1617	23.2809	24.1143	24.7592	23.4729	23.7152	23.3933	23.5741	22.9793	23.2915	23.2622	1.03956	0.72245	1.14723	0.937799	1.31622	0.383207
mce1D	Mce-family protein Mce1D	Unknown, but thought to be involved in host cell invasion.	O07416	Rv0172	Mb0178	virulence, detoxification, adaptation	56.516	21	49.8	0	204.13	23.2362	23.7768	24.3983	24.189	26.0973	25.0169	23.3123	23.5444	24.0185	25.903	22.8473	22.9667	0.0326228	-0.10191	0.450724	1.19541	0.0985485	-0.280603
Rv0431	Putative tuberculin related peptide	Unknown	P96277	Rv0431	Mb0439	cell wall and cell processes	16.865	6	53.7	0	127.29	23.0763	23.7412	24.7681	24.3809	24.0044	23.6284	24.5167	24.239	22.7018	26.0272	24.0037	25.9881	0.825309	-1.47776	0.885455	-1.33508	0.803805	-1.5205
Rv0177	Probable conserved Mce associated protein	Unknown	O07421	Rv0177	Mb0183	conserved hypotheticals	20.164	12	63	0	56.82	23.7246	24.092	24.0994	24.7769	25.0489	23.7426	23.6205	23.7229	22.7327	24.2671	24.9128	23.4549	0.211398	-0.239618	0.207627	0.311174	0.744113	-0.852931
moaE2	Probable molybdopterin biosynthesis protein MoeA2	Involved in molybdenum cofactor biosynthesis: involved in the biosynthesis of a demolybdo-cofactor (molybdopterin), necessary for molybdo-enzymes.	P9WJQ5	Rv0438c	Mb0446c	intermediary metabolism and respiration	42.021	7	23.7	0	6.1826	24.3255	23.0527	24.5716	23.9354	24.2726	24.4351	24.9451	24.2171	24.7396	23.9783	24.8721	23.569	0.0918232	-0.156598	0.0629121	0.0745703	0.487061	0.494108
Rv0187	Probable O-methyltransferase	Thought to be involved in transfer of methyl group.	O07431	Rv0187	Mb0193	intermediary metabolism and respiration	23.097	11	46.4	0	26.471	26.1227	25.794	26.2369	25.0328	23.9764	25.5319	25.9633	26.0832	25.9673	26.5231	25.7365	26.1801	0.133232	-0.0953509	1.1932	-1.29953	0.242422	-0.141935
mmpS4	Probable conserved membrane protein MmpS4	Unknown	P9WJS9	Rv0451c	Mb0459c	cell wall and cell processes	15.403	3	47.1	0	80.95	23.9952	23.2963	23.3757	23.198	24.4377	24.131	24.0228	23.2181	24.5576	22.755	22.7963	23.1699	1.18499	0.648647	1.20639	1.01514	1.17331	1.02572
Rv0192	Conserved hypothetical protein	Function unknown	O07436	Rv0192	Mb0198	conserved hypotheticals	36.567	10	42.6	0	239.17	27.6926	27.5958	27.8053	27.0055	25.679	26.6558	27.5139	27.5951	27.5004	23.2117	27.0761	26.6947	0.761163	2.03704	0.239696	0.785921	0.694777	1.87561
zmp1	Probable zinc metalloprotease Zmp1	Function unknown; hydrolyzes peptides and/or proteins.	I6X8R2	Rv0198c	Mb0204c	intermediary metabolism and respiration	73.913	31	59.6	0	323.31	30.0935	30.2469	30.1637	30.0117	29.8213	29.7871	29.9829	30.035	30.1785	30.1705	30.0077	29.9393	0.722198	0.128896	0.780892	-0.165763	0.1053	0.026329
fadE3	Probable acyl-CoA dehydrogenase FadE3	Function unknown, but involved in lipid degradation.	P96397	Rv0215c	Mb0221c	lipid metabolism	41.963	15	69.3	0	228.76	22.4052	23.6459	22.9432	23.4345	23.4527	24.3855	24.3435	23.1893	22.7386	23.6387	24.1545	23.4901	0.861618	-0.763028	0.00311356	-0.00355275	0.258963	-0.337323
pcaA	Mycolic acid synthase PcaA (cyclopropane synthase)	Involved in the mycolic acid modification or synthesis; essential for the cyclopropanation function. Required for cording and mycolic acid cyclopropane ring synthesis in the cell wall.	P9WPB3	Rv0470c	Mb0479c	lipid metabolism	33.027	16	77	0	110.23	27.1379	25.4063	26.1686	25.672	25.3077	27.6757	26.8523	26.5005	26.6513	25.5718	26.2063	27.0641	0.02174	-0.0431252	0.0243956	-0.062252	0.363994	0.387313
fadE4	Probable acyl-CoA dehydrogenase FadE4	Function unknown, but involved in lipid degradation.	P96414	Rv0231	Mb0236	lipid metabolism	63.494	31	69.4	0	323.31	30.6619	30.8041	30.6594	30.5934	31.3243	30.653	30.6028	30.8428	30.6614	31.4497	30.7646	30.604	0.366031	-0.230975	0.0835875	-0.0825284	0.368381	-0.237093
lpqI	Probable conserved lipoprotein LpqI	Unknown	L7N6B0	Rv0237	Mb0243	cell wall and cell processes	39.518	18	60.6	0	279.24	23.5737	24.9674	24.7337	24.6819	24.5614	23.3821	23.3961	22.0766	23.5568	23.6785	24.3229	23.4959	0.522197	0.592464	0.317727	0.376015	0.705964	-0.822626
fabG	Probable 3-oxoacyl-[acyl-carrier protein] reductase FabG4 (3-ketoacyl-acyl carrier protein reductase)	Involved in the fatty acid biosynthesis pathway (first reduction step) [catalytic activity: (3R)-3-hydroxyacyl-[acyl-carrier protein] + NADP+ = 3-oxoacyl-[acyl-carrier protein] + NADPH].	I6Y778	Rv0242c	Mb0248c	lipid metabolism	46.83	39	89.6	0	323.31	32.0414	31.9745	31.9911	32.4111	31.9106	32.4635	32.521	32.0712	32.1641	32.2427	32.1364	32.1804	2.1261	-0.184183	0.157595	0.0752405	0.177188	0.0655924
Rv0247c	Probable succinate dehydrogenase [iron-sulfur subunit] (succinic dehydrogenase)	Involved in interconversion of fumarate and succinate (aerobic respiration) [catalytic activity: succinate + acceptor = fumarate + reduced acceptor].	O53669	Rv0247c	Mb0253c	intermediary metabolism and respiration	28.626	18	60.5	0	323.31	29.6044	29.3873	29.3688	29.2331	29.3575	29.2088	29.2271	29.6275	29.3969	29.7138	29.5033	29.9582	0.830489	-0.271622	1.52095	-0.458633	0.812883	-0.307966
Rv0474	Probable transcriptional regulatory protein	Possibly involved in transcriptional mechanism.	P9WMH9	Rv0474	Mb0484	regulatory proteins	15.364	6	51.4	0	67.899	22.8804	23.5784	23.3754	23.4414	23.3525	24.257	23.8775	24.2864	24.0575	24.2821	23.589	24.0104	1.10973	-0.682426	0.323403	-0.276849	0.184968	0.11333
Rv0493c	Conserved protein	Function unknown	P9WKU7	Rv0493c	Mb0504c	conserved hypotheticals	35.397	6	29.2	0	19.398	23.6001	23.838	23.7973	24.1009	24.0217	23.6833	24.0649	24.2934	24.3372	25.2042	23.4059	23.9974	0.35635	-0.457362	0.187578	-0.26722	0.0181935	0.0293312
Rv0526	Possible thioredoxin protein (thiol-disulfide interchange protein)	Possibly acts on thioredoxin	O06392	Rv0526	Mb0539	intermediary metabolism and respiration	23.218	13	66.7	0	87.216	24.3317	23.6341	24.1653	22.491	23.7089	24.8845	24.3872	24.8314	23.7702	24.1544	22.9386	23.9209	0.363333	0.372381	0.00986785	0.0235182	0.611387	0.65833
Rv0531	Possible conserved membrane protein	Unknown	O06397	Rv0531	Mb0544	cell wall and cell processes	11.468	4	21.9	0	34.101	24.1019	24.6913	25.4167	25.3148	25.1705	24.2042	24.1657	24.9638	24.0159	22.9963	23.0976	22.1678	1.83627	1.9828	2.02946	2.14263	1.75985	1.62794
Rv0537c	Probable integral membrane protein	Unknown	O06403	Rv0537c	Mb0551c	cell wall and cell processes	50.202	7	22.6	0	28.35	23.4099	23.1978	22.3631	24.7752	23.0498	22.8935	23.8995	24.8187	24.4765	24.0616	23.0801	24.2802	0.770888	-0.817049	0.121032	-0.234457	0.576859	0.590897
Rv0552	Conserved protein	Function unknown	O06418	Rv0552	Mb0567	conserved hypotheticals	57.339	16	50.6	0	64.413	26.8689	26.9268	26.806	26.892	27.2671	27.1289	27.0146	26.5306	27.0333	27.1139	26.3872	26.9399	0.0856838	0.053599	0.504255	0.282372	0.0578866	0.0458482
lpqN	Probable conserved lipoprotein LpqN	Unknown	O53780	Rv0583c	Mb0598c	cell wall and cell processes	23.682	7	48.2	0	78.423	23.0365	24.9169	25.2123	24.2057	25.3946	25.8231	24.1841	23.9027	24.3804	26.6374	24.4274	23.6021	0.166374	-0.500394	0.0871673	0.252174	0.329214	-0.733215
Rv0303	Probable dehydrogenase/reductase	Function unknown; probably involved in cellular metabolism.	O07230	Rv0303	Mb0311	intermediary metabolism and respiration	32.711	17	66.9	0	108.75	22.6703	24.1917	23.6539	24.3117	25.1243	22.695	24.9939	22.6711	24.8455	23.5983	24.4731	23.1634	0.151884	-0.239628	0.135867	0.298719	0.193272	0.425201
Rv0308	Probable conserved integral membrane protein	Unknown	O07235	Rv0308	Mb0316	cell wall and cell processes	25.613	5	18.9	0	55.274	23.3073	24.3822	24.7681	24.7585	26.1985	25.2608	24.9634	24.7669	24.9648	25.7601	24.0952	23.1426	0.0716079	-0.180101	0.542801	1.07329	0.299229	0.565708
Rv0313	Conserved protein	Function unknown	P9WL03	Rv0313	Mb0321	conserved hypotheticals	13.948	11	86.7	0	218.57	23.7923	25.6282	24.6891	24.5563	26.9622	26.0846	24.98	26.3459	22.806	24.8058	23.6569	25.0985	0.0948177	0.182769	0.745817	1.34731	0.0587592	0.190222
Rv0325;Rv0326	Hypothetical protein	Unknown	O07250	Rv0325;Rv0326	Mb0333	Unknown	25.17	2	13.1	0	4.3309	23.6923	24.4614	22.7861	25.0266	24.695	23.6656	24.714	23.8762	24.761	25.6048	23.2742	23.5928	0.228375	-0.510656	0.134415	0.305148	0.138159	0.293126
Rv0331	Possible dehydrogenase/reductase	Function unknown; probably involved in cellular metabolism.	O07255	Rv0331	Mb0338	intermediary metabolism and respiration	40.788	15	59	0	252.48	28.5553	28.6571	28.7758	28.6864	29.2467	28.1899	28.418	28.3155	28.5086	29.0972	28.1554	28.5999	0.0559455	0.0452709	0.0776454	0.0901534	0.297224	-0.20344
vapC27	Possible toxin VapC27. Contains PIN domain.	Unknown	P9WF83	Rv0598c	Mb0614c	virulence, detoxification, adaptation	14.818	4	36.5	0	9.1633	23.9431	23.5988	23.2222	23.5391	23.5622	24.074	23.6462	24.1632	24.3945	24.768	24.2812	22.9455	0.283453	-0.410178	0.181794	-0.273132	0.0403311	0.069732
Rv0347	Probable conserved membrane protein	Unknown	O06298	Rv0347	Mb0355	cell wall and cell processes	36.597	13	49.1	0	267.13	27.265	26.0734	26.7556	27.2579	23.919	26.9134	26.9438	26.6235	26.9047	25.7018	26.6514	27.093	0.150078	0.215916	0.147961	-0.451947	0.333627	0.341946
Rv0361	Probable conserved membrane protein	Unknown	O06311	Rv0361	Mb0368	cell wall and cell processes	29.982	12	60	0	202.34	23.5936	23.3676	24.2767	23.0423	23.3972	23.4963	23.9971	24.1814	23.1852	25.128	24.1177	23.6228	0.449432	-0.543521	0.988065	-0.97756	0.393391	-0.501599
Rv0633c	Possible exported protein	Unknown	P96923	Rv0633c	Mb0650c	cell wall and cell processes	31.933	10	42.4	0	21.017	22.8521	24.0933	24.1474	22.5031	23.8633	22.0601	24.1264	24.4099	23.5937	23.9607	23.7871	23.0161	0.075095	0.109657	0.562017	-0.779144	0.533522	0.455374
Rv0637	(3R)-hydroxyacyl-ACP dehydratase subunit HadC	Involved in fatty acid synthesis type II (fas-II)	P9WFJ9	Rv0637	Mb0656	intermediary metabolism and respiration	18.929	11	52.4	0	102.95	29.32	29.2157	29.21	28.7039	27.1744	29.0592	29.3015	28.9238	29.2709	28.4293	28.9837	29.5046	0.36965	0.276075	0.430064	-0.660015	0.22639	0.192888
mmaA2	Methoxy mycolic acid synthase 2 MmaA2 (methyl mycolic acid synthase 2) (MMA2) (hydroxy mycolic acid synthase)	Involved in mycolic acids modification. Catalyzes unusual S-adenosyl-methionine-dependent transformation of a cis-olefin mycolic acid into a secondary alcohol. Catalyzes introduction of a hydroxyl group at the distal position on mycolic acid chains to produce the hydroxyl mycolate. Mycolic acids represent a major constituent of the mycobacterial cell wall complex. Methyl transfer results in forma…	Q79FX6	Rv0644c	Mb0663c	lipid metabolism	32.681	23	85.7	0	298.58	29.6909	29.038	29.0822	26.9914	23.6444	29.3238	29.0882	28.7178	29.1818	27.7803	29.1806	29.3024	0.41236	0.515919	0.539583	-2.10122	0.180719	0.241489
mkl	Possible ribonucleotide-transport ATP-binding protein ABC transporter Mkl	Thought to be involved in active transport of ribonucleotide across the membrane. Responsible for energy coupling to the transport system.	P9WQL5	Rv0655	Mb0674	cell wall and cell processes	39.394	19	54	0	143.28	26.0228	25.3245	25.44	24.1458	26.5414	25.1804	24.5927	25.5812	22.5179	23.9993	25.6461	26.1962	0.17172	0.315252	0.00295633	0.00866127	0.396945	-1.04993
Rv0406c	Beta lactamase like protein	Function unknown	O86336	Rv0406c	Mb0414c	conserved hypotheticals	29.22	11	46.3	0	135.87	23.2655	23.187	23.7232	24.0438	23.8668	23.1717	23.6061	24.1616	24.4722	22.9796	22.7972	23.7753	0.238069	0.207824	0.564498	0.510048	1.07187	0.895927
mazE2	Possible antitoxin MazE2	Function unknown	O06779	Rv0660c	Mb0679c	virulence, detoxification, adaptation	9.1689	2	24.7	0	17.89	23.6245	24.5103	24.0445	25.4738	25.5029	22.871	24.1696	23.4804	23.7403	24.7308	24.4334	24.0575	0.467681	-0.347476	0.0825429	0.208653	1.02406	-0.610474
glnH	Probable glutamine-binding lipoprotein GlnH (GLNBP)	Involved in active transport of glutamine across the membrane (import). Interacts with the glutamine-transport system.	P96257	Rv0411c	Mb0419c	cell wall and cell processes	35.405	13	37.5	0	37.228	23.5325	23.0967	23.5581	23.2206	23.7984	22.5334	23.9986	23.8168	23.4798	23.7722	23.5447	24.2127	0.841861	-0.447447	0.727322	-0.659058	0.114314	-0.0781186
Rv0687	Probable short-chain type dehydrogenase/reductase	Function unknown; possibly involved in cellular metabolism.	P9WGS7	Rv0687	Mb0706	intermediary metabolism and respiration	29.028	10	46.9	0	42.145	25.2431	26.0824	25.7035	25.9251	24.4796	25.7448	25.4961	25.7448	25.7472	25.2167	23.3036	25.5167	0.609085	0.997347	0.353109	0.704163	0.635285	0.983725
lpqL	Probable lipoprotein aminopeptidase LpqL	Function unknown; hydrolyzes peptides and/or proteins.	P96264	Rv0418	Mb0426	cell wall and cell processes	52.042	30	64.4	0	323.31	23.4673	25.15	24.9971	21.8282	25.7571	26.121	24.6714	25.5383	25.1837	26.1322	24.0084	24.9592	0.239033	-0.495176	0.111789	-0.464481	0.0506546	0.0978711
pssA	Probable CDP-diacylglycerol--serine O-phosphatidyltransferase PssA (PS synthase) (phosphatidylserine synthase)	Involved in phospholipid biosynthesis. Generates phosphatidylserine [catalytic activity: CDP-diacylglycerol + L-serine = CMP + O-SN-phosphatidyl-L-serine].	P9WPG1	Rv0436c	Mb0444c	lipid metabolism	31.218	4	17.5	0	29.016	24.599	22.9666	24.3118	24.7376	23.6472	23.5306	24.0838	24.3538	25.4742	24.1856	22.9307	24.3804	0.0652048	0.126922	0.0829825	0.139577	0.57579	0.80504
Rv0443	Conserved protein	Function unknown	O53728	Rv0443	Mb0451	conserved hypotheticals	18.958	10	72.5	0	148.45	25.2566	24.4733	23.773	24.7343	23.9313	25.2285	25.3953	24.6706	23.3999	24.4572	24.8145	25.3049	0.293439	-0.357904	0.193574	-0.227499	0.229258	-0.370298
mmpL4	Probable conserved transmembrane transport protein MmpL4	Unknown. Thought to be involved in fatty acid transport.	P9WJV3	Rv0450c	Mb0458c	cell wall and cell processes	105.23	18	28.9	0	96.858	23.0699	23.3468	23.3124	23.8573	23.4752	23.5027	23.1926	23.6171	23.6633	24.0522	24.5346	22.8869	0.513237	-0.581525	0.158216	-0.212848	0.259732	-0.333574
Rv0455c	Conserved protein	Function unknown	O53740	Rv0455c	Mb0463c	conserved hypotheticals	16.64	4	35.1	0	3.4345	23.7304	23.5981	23.9823	23.2469	23.5232	23.9554	24.2205	25.3168	23.1418	23.6513	24.9071	24.5195	0.691297	-0.589045	0.858383	-0.784133	0.0633465	-0.132912
Rv0464c	Conserved protein	Function unknown	O53749	Rv0464c	Mb0473c	conserved hypotheticals	21.304	8	54.7	0	119.15	27.5228	27.4443	27.1366	27.4251	26.6795	27.434	26.7909	27.0164	27.2387	27.0998	27.0598	27.5174	0.308752	0.142228	0.0549629	-0.0461604	0.465982	-0.210342
umaA	Possible mycolic acid synthase UmaA	Involved in mycolic acid modification or synthesis.	Q6MX39	Rv0469	Mb0478	lipid metabolism	33.095	17	63.3	0	153.93	28.2625	27.4377	27.6707	26.4047	24.9801	28.113	28.1115	27.3787	27.8266	27.3664	27.8875	28.3841	0.0822446	-0.0890649	0.65602	-1.38008	0.106431	-0.107116
aldA	Probable aldehyde dehydrogenase NAD dependent AldA (aldehyde dehydrogenase [NAD+])	Oxidizes a variety of aldehydes [catalytic activity: an aldehyde + NAD+ + H2O = an acid + NADH].	I6X9R9	Rv0768	Mb0791	intermediary metabolism and respiration	51.183	12	33.9	0	33.671	26.0715	25.737	26.2402	25.7063	22.8752	23.7493	25.8939	25.7946	25.9474	23.8858	26.0126	26.0003	0.423464	0.716702	0.470168	-1.18928	0.337701	0.579064
ggtA	Probable bifunctional acylase GgtA: cephalosporin acylase (GL-7ACA acylase) + gamma-glutamyltranspeptidase (GGT)	Besides the cephalosporin acylase I activity which converts GL-7ACA into 7-ACA; this enzyme displays some gamma glutamyltranspeptidase activity: GGT plays a key role in the gamma-glutamyl cycle, a pathway for the synthesis and degradation of glutathione. [catalytic activity 1: 7-beta-(4-carboxybutanamido)-cephalosporanic acid + H2O = 7-aminocephalosporanic acid + glutaric acid] [catalytic activit…	I6X9S5	Rv0773c	Mb0796c	intermediary metabolism and respiration	54.592	20	46.7	0	77.678	27.1701	27.4945	27.1154	27.2609	27.4165	27.5067	27.1615	27.2405	27.1146	28.351	26.2758	27.793	0.123533	-0.21328	0.042908	-0.0785484	0.184945	-0.301068
pknA	Transmembrane serine/threonine-protein kinase A PknA (protein kinase A) (STPK A)	Involved in signal transduction (via phosphorylation). Thought to regulate morphological changes associated with cell division/differentiation process. Phosphorylates at serine and threonine residues [catalytic activity: ATP + a protein = ADP + a phosphoprotein].	P9WI83	Rv0015c	Mb0015c	regulatory proteins	45.596	12	36.2	0	49.76	23.2651	24.9337	24.5145	24.1271	24.8349	24.6641	24.3861	23.9501	24.5591	25.2305	24.5547	24.3973	0.363358	-0.489709	0.216763	-0.185483	0.615062	-0.429091
purQ	Probable phosphoribosylformylglycinamidine synthase I PURG (FGAM synthase I)	Involved in de novo purine biosynthesis (at the fourth step) [catalytic activity: ATP + 5'-phosphoribosylformylglycinamide + L-glutamine + H2O = ADP + phosphate + 5'-phosphoribosylformylglycinamidine + L-glutamate].	P9WHL5	Rv0788	Mb0812	intermediary metabolism and respiration	23.633	9	52.7	0	86.964	27.4594	27.1757	27.0919	27.2449	25.6826	27.3945	27.0596	26.9929	26.8853	25.367	26.7124	27.0923	0.728997	0.851775	0.194299	0.383436	0.487286	0.588692
Rv0473	Possible conserved transmembrane protein	Unknown	I6Y3V3	Rv0473	Mb0483	cell wall and cell processes	50.588	18	44.3	0	27.474	24.4422	23.6098	22.9733	22.4368	24.4868	23.3089	22.9843	23.895	23.5579	23.1884	22.8227	23.1491	0.635873	0.62168	0.231685	0.357409	0.665438	0.425659
Rv0480c	Possible amidohydrolase	Function unknown; hydrolytic enzyme probably involved in cellular metabolism.	P9WJ01	Rv0480c	Mb0490c	intermediary metabolism and respiration	28.995	12	64.3	0	143.73	28.2713	28.5565	28.4452	28.5621	28.4156	28.3794	28.4967	28.4915	28.4476	28.8784	28.2097	28.3896	0.114458	-0.0681998	0.0676075	-0.0401834	0.0232845	-0.0139612
Rv0799c	Conserved protein	Function unknown	I6Y4U9	Rv0799c	Mb0822c	conserved hypotheticals	36.047	12	57.3	0	108.27	26.4058	26.2727	26.2563	26.4142	26.3194	25.8895	26.4608	26.2588	26.4471	26.5868	26.7235	26.2018	0.517385	-0.192395	0.589149	-0.296338	0.27264	-0.115101
ssb	Single-strand binding protein Ssb (helix-destabilizing protein)	This protein is essential for replication of the chromosome. It is also involved in DNA recombination and repair.	P9WGD5	Rv0054	Mb0055	information pathways	17.353	11	78	0	323.31	30.3404	30.3648	30.4741	30.2562	31.345	30.2082	30.3385	30.4828	30.2655	31.0464	30.0172	30.3659	0.0979001	-0.083341	0.0945367	0.126661	0.136481	-0.114197
Rv0497	Probable conserved transmembrane protein	Unknown	P9WKU3	Rv0497	Mb0508	cell wall and cell processes	33.092	12	53.5	0	234.87	22.6899	24.2031	24.3415	22.5245	25.1015	23.951	24.6922	23.2778	22.908	25.1726	24.248	24.4901	0.678955	-0.892082	0.416497	-0.777927	0.762316	-1.01091
Rv0811c	Conserved protein	Function unknown	I6X9V3	Rv0811c	Mb0834c	conserved hypotheticals	39.446	7	29.6	0	33.704	24.5947	24.4303	24.2738	23.4288	26.0106	22.8733	24.6149	24.4149	24.4382	23.4666	23.9066	25.2212	0.165237	0.234767	0.0286702	-0.0939172	0.212895	0.291187
icd2	Probable isocitrate dehydrogenase [NADP] Icd2 (oxalosuccinate decarboxylase) (IDH) (NADP+-specific ICDH) (IDP)	Involved in the KREBS cycle [catalytic activity: isocitrate + NADP+ = 2-oxoglutarate + CO(2) + NADPH].	O53611	Rv0066c	Mb0067c	intermediary metabolism and respiration	82.535	53	83.1	0	323.31	32.2545	32.3341	32.249	32.3037	29.8356	32.2213	32.1131	32.1598	32.3203	30.1865	32.0888	32.2319	0.51664	0.776819	0.0155189	-0.0488784	0.452246	0.695322
Rv0513	Possible conserved transmembrane protein	Unknown	O33358	Rv0513	Mb0526	cell wall and cell processes	19.401	8	41.2	0	228.11	23.9357	24.0945	23.5334	23.7136	25.1706	24.9082	24.1305	24.2911	24.5892	24.4733	24.1262	24.5417	1.1731	-0.525874	0.176603	0.217074	0.0826515	-0.0434723
lpqQ	Possible lipoprotein LpqQ	Unknown	O53846	Rv0835	Mb0858	cell wall and cell processes	22.903	6	46.7	0	16.516	23.6953	23.5209	23.1972	23.3324	23.2031	24.0566	23.0929	24.5133	22.441	22.8072	23.8734	24.7284	0.225862	-0.331864	0.166688	-0.272296	0.213192	-0.453923
Rv0525	Conserved protein	Function unknown	O06391	Rv0525	Mb0538	conserved hypotheticals	22.212	11	76.2	0	220.97	22.6743	24.0581	24.0367	22.9294	24.0835	25.3442	23.7759	23.6464	23.0171	25.0071	24.2813	23.825	0.612383	-0.781456	0.118015	-0.252089	1.00433	-0.89136
Rv0530	Conserved protein	Function unknown	O06396	Rv0530	Mb0543	conserved hypotheticals	43.054	12	47.7	0	178.26	26.9294	27.1029	27.5571	24.8903	24.5616	27.4536	27.4698	27.2706	27.2136	26.5593	26.9257	27.3675	0.339118	0.245606	0.627747	-1.31571	0.67745	0.367163
galE3	Probable UDP-glucose 4-epimerase GalE3 (galactowaldenase) (UDP-galactose 4-epimerase) (uridine diphosphate galactose 4-epimerase) (uridine diphospho-galactose 4-epimerase)	Possibly involved in galactose metabolism [catalytic activity: UDP-glucose = UDP-galactose].	L7N670	Rv0536	Mb0550	intermediary metabolism and respiration	36.219	8	25.4	0	25.639	23.718	23.6596	23.9779	23.285	23.6034	25.2253	23.4354	24.6405	23.6274	23.8538	24.2602	23.6631	0.280762	-0.140512	0.0622695	0.112243	0.0197813	-0.0245508
Rv0546c	Conserved protein	Function unknown	O06412	Rv0546c	Mb0560c	conserved hypotheticals	14.346	9	89.1	0	58.868	27.5153	27.6318	27.4891	27.653	28.3677	27.2607	27.3973	27.8887	27.5251	27.7749	27.5201	27.5402	0.288499	-0.066267	0.167987	0.148788	0.0157315	-0.00799179
fadD10	Possible fatty-acid-CoA ligase FadD10 (fatty-acid-CoA synthetase) (fatty-acid-CoA synthase)	Function unknown, but involvement in lipid degradation.	P9WQ55	Rv0099	Mb0102	lipid metabolism	56.589	9	26.5	0	20.157	24.3185	24.3312	24.4594	24.319	24.9959	24.0726	24.4002	25.3385	24.8235	24.2778	24.408	24.3065	0.259018	0.038957	0.179723	0.131785	0.889724	0.523321
fadD8	Probable fatty-acid-CoA ligase FadD8 (fatty-acid-CoA synthetase) (fatty-acid-CoA synthase)	Function unknown, but involved in lipid degradation.	O06417	Rv0551c	Mb0566c	lipid metabolism	61.065	23	65	0	238.45	28.7505	28.4517	28.6809	28.6039	25.1105	28.6641	28.6025	28.6354	28.9316	27.8633	28.7596	28.884	0.138838	0.125383	0.356437	-1.04281	0.260242	0.220877
moaE2	Probable molybdenum cofactor biosynthesis protein E2 MoaE2 (molybdopterin converting factor large subunit) (molybdopterin [MPT] converting factor, subunit 2)	Possibly a molybdenum biosynthesis cofactor. Conversion of molybdopterin precursor Z into molybdopterin requires transfer of two sulfur atoms to precursor Z (to generate the dithiolene group). This is catalyzed by the converting factor composed of a small and large subunit.	P9WJR1	Rv0866	Mb0890	intermediary metabolism and respiration	15.048	4	44	0	44.593	23.3204	25.633	23.8406	25.8176	26.0599	25.9057	25.7558	25.8189	24.0681	23.8719	24.9971	25.6404	0.261902	-0.571777	0.980496	1.09124	0.186983	0.377803
fusA2	Probable elongation factor G FusA2 (EF-G)	Involved in translation mechanism. This protein may promote the GTP-dependent translocation of the nascent protein chain from the A-site to the P-site of the ribosome.	P9WNM9	Rv0120c	Mb0124c	information pathways	75.633	19	40.2	0	60.318	27.2101	27.3072	27.0013	26.946	23.5883	26.913	27.4523	26.6995	27.2754	23.4786	26.7123	26.8347	0.60922	1.49769	0.0302452	0.140577	0.583153	1.46721
cspB	Probable cold shock-like protein B CspB	Function unknown; thought to act in response to low temperature.	I6WZM9	Rv0871	Mb0895	virulence, detoxification, adaptation	15.021	5	47.4	0	7.4049	22.8142	24.8267	24.8597	23.5699	26.2175	24.0273	25.1205	24.5009	23.3269	25.6687	22.5977	24.1445	0.00883082	0.0299314	0.144063	0.467931	0.0602487	0.179152
cfp30B	Conserved protein TB27.3	Function unknown. Involved in ability to absorb neutral red stain.	P9WIR3	Rv0577	Mb0592	conserved hypotheticals	27.343	7	51.7	0	274.76	29.1472	29.1002	29.2493	29.164	29.7807	29.1097	29.3867	29.5705	29.3778	29.8682	29.1857	29.3588	0.660082	-0.30534	0.149852	-0.119457	0.0411043	-0.0258757
pepA	Probable serine protease PepA (serine proteinase) (MTB32A)	Function unknown; possibly hydrolyzes peptides and/or proteins (seems to cleave preferentially after serine residues).	O07175	Rv0125	Mb0130	intermediary metabolism and respiration	34.926	5	24.8	0	83.614	26.7057	27.0531	27.306	26.0002	25.5792	22.9561	26.9039	22.8881	27.4267	23.6488	26.6099	27.5353	0.387649	1.09027	0.290909	-1.08616	0.0350308	-0.191771
fadE1	Probable acyl-CoA dehydrogenase FadE1	Function unknown, but involved in lipid degradation.	P96808	Rv0131c	Mb0136c	lipid metabolism	50.223	16	48.1	0	93.036	26.1368	26.3402	26.206	26.2946	25.6456	26.1734	26.1225	26.8033	26.2458	26.9909	26.5092	26.4433	1.08157	-0.420141	1.08794	-0.609918	0.40141	-0.257256
Rv0143c	Probable conserved transmembrane protein	Unknown; possibly ion channel involved in transport of chloride across the membrane.	P96820	Rv0143c	Mb0148c	cell wall and cell processes	50.807	6	17.3	0	42.162	23.7831	24.2557	22.5174	23.3441	24.6547	24.0144	24.4443	24.6589	23.8988	24.4427	24.4891	22.4372	0.115472	-0.270936	0.0993864	0.214737	0.311726	0.544371
pntAa	Probable NAD(P) transhydrogenase (subunit alpha) PntAa [first part; catalytic part] (pyridine nucleotide transhydrogenase subunit alpha) (nicotinamide nucleotide transhydrogenase subunit alpha)	The transhydrogenation between NADH and NADP is coupled to respiration and ATP hydrolysis and functions as a proton pump across the membrane [catalytic activity: NADPH + NAD+ = NADP+ + NADH].	P96832	Rv0155	Mb0160	intermediary metabolism and respiration	37.693	20	71	0	323.31	30.584	30.373	30.4504	30.3767	29.8492	30.5181	30.3676	30.3938	30.6833	29.9151	30.4361	30.9242	0.0507202	0.043965	0.190871	-0.177131	0.0635701	0.0563831
echA6	Possible enoyl-CoA hydratase EchA6 (enoyl hydrase) (unsaturated acyl-CoA hydratase) (crotonase)	Could possibly oxidize fatty acids using specific components [catalytic activity: (3S)-3-hydroxyacyl-CoA = trans-2(or 3)-enoyl-CoA + H(2)O].	P9WNP1	Rv0905	Mb0929	lipid metabolism	26.029	25	79.8	0	323.31	30.668	30.3407	30.3999	29.7966	28.9074	30.4199	30.1581	29.8105	30.1509	29.1769	30.1056	30.3751	0.707405	0.58364	0.113343	-0.177951	0.150839	0.153933
mce1B	Mce-family protein Mce1B	Unknown, but thought to be involved in host cell invasion.	O07414	Rv0170	Mb0176	virulence, detoxification, adaptation	37.727	10	37	0	82.524	25.3144	24.1269	23.9465	24.6109	26.0512	24.8236	23.1654	24.5442	24.0481	26.36	22.5579	24.3085	0.015117	0.0538254	0.251641	0.753102	0.156633	-0.489563
Rv0175	Probable conserved Mce associated membrane protein	Unknown	O07419	Rv0175	Mb0181	cell wall and cell processes	22.356	11	62	0	323.31	25.9439	26.0271	26.3335	25.8483	24.9188	25.3439	26.2339	26.0023	26.3469	26.5252	25.9434	26.4122	0.37675	-0.192078	1.33979	-0.923266	0.184648	-0.0992152
Rv0180c	Probable conserved transmembrane protein	Unknown	O07424	Rv0180c	Mb0186c	cell wall and cell processes	47.593	16	41.6	0	323.31	22.9337	22.5627	23.7652	23.8081	23.9182	24.897	23.7282	24.8938	23.4282	23.5571	24.2656	22.3885	0.185049	-0.316507	0.549464	0.804045	0.361879	0.612974
hadB	(3R)-hydroxyacyl-ACP dehydratase subunit HadB	Involved in fatty acid synthesis type II (fas-II)	I6WYY7	Rv0636	Mb0655	intermediary metabolism and respiration	14.904	10	84.5	0	202.35	30.058	29.7527	29.8405	29.6802	29.4609	30.0359	29.8251	29.6711	29.8208	29.7811	29.3648	30.0452	0.283852	0.1534	0.00589179	-0.00466092	0.0719535	0.0419801
Rv0925c	Conserved protein	Function unknown	I6Y946	Rv0925c	Mb0948c	conserved hypotheticals	26.944	16	67.8	0	323.31	30.6802	30.8109	30.7511	30.7457	31.1288	30.7881	30.5532	30.6369	30.6972	31.083	30.1239	30.5054	0.248575	0.176639	0.448149	0.316744	0.0725338	0.0583318
ricR	Conserved protein	Function unknown	O07434	Rv0190	Mb0196	conserved hypotheticals	10.365	5	80.2	0	136.61	23.4043	23.6243	22.8279	23.6292	24.2466	25.9147	23.6956	24.4648	23.9264	24.5529	23.6973	23.929	1.04281	-0.774261	0.299247	0.537107	0.0303018	-0.0308145
Rv0654	Probable dioxygenase	Function unknown; probably involved in cellular metabolism.	P9WPR5	Rv0654	Mb0673	intermediary metabolism and respiration	54.943	16	51.5	0	157.99	25.8601	26.9151	24.2297	26.3463	24.4655	23.1497	24.5119	26.6221	25.1279	27.4937	26.258	26.8778	0.634178	-1.20819	1.0508	-2.22267	0.944705	-1.45585
mmpL3	Possible conserved transmembrane transport protein MmpL3	Unknown. Thought to be involved in fatty acid transport.	P9WJV5	Rv0206c	Mb0212c	cell wall and cell processes	100.88	41	46.1	0	323.31	21.3017	24.0121	23.4616	23.0769	22.5239	24.7724	23.1863	22.6785	22.6938	24.3104	22.6189	23.5633	0.233918	-0.57233	0.0157937	-0.0397758	0.552072	-0.644629
fadE8	Probable acyl-CoA dehydrogenase FadE8	Function unknown, but involved in lipid degradation.	I6X9J0	Rv0672	Mb0691	lipid metabolism	58.534	26	63.8	0	323.31	29.4008	29.4999	29.1293	29.4237	29.4633	29.6602	29.0691	29.5204	29.4628	29.3432	28.5627	29.1009	0.59621	0.341059	0.995255	0.513446	0.572749	0.348495
mmpS5	Possible conserved membrane protein MmpS5	Unknown	P9WJS7	Rv0677c	Mb0696c	cell wall and cell processes	15.248	8	78.2	0	46.33	23.2195	23.3023	23.8972	24.0267	25.1184	23.0159	22.7627	23.8027	24.7836	24.0973	23.4556	23.0979	0.0749606	-0.0772419	0.304067	0.503423	0.131153	0.232787
vapC51	Possible conserved membrane protein with PIN domain	Unknown	L0T5V6	Rv0229c	Mb0234c	cell wall and cell processes	15.025	8	51.1	0	12.243	24.3873	25.6884	25.0897	24.9769	25.2714	24.7931	24.8714	24.6996	25.1388	25.1888	24.6332	25.3191	0.00614063	0.00806554	0.0450293	-0.0332451	0.228874	-0.143789
echA7	Probable enoyl-CoA hydratase EchA7 (enoyl hydrase) (unsaturated acyl-CoA hydratase) (crotonase)	Could possibly oxidize fatty acids using specific components [catalytic activity: (3S)-3-hydroxyacyl-CoA = trans-2(or 3)-enoyl-CoA + H(2)O].	P71540	Rv0971c	Mb0996c	lipid metabolism	27.604	10	36.4	0	26.993	26.4243	25.8866	26.7407	26.7178	26.3545	26.7326	26.2914	24.0831	26.4683	26.7598	26.0404	26.5776	0.120174	-0.108691	0.223417	0.142368	0.457348	-0.844998
Rv0976c	Conserved hypothetical protein	Function unknown	O86320	Rv0976c	Mb1001c	conserved hypotheticals	59.122	13	30.7	0	28.953	25.1448	25.1187	25.3642	25.6433	23.3451	25.4393	25.5522	25.4231	25.6657	23.0154	25.3757	25.5516	0.274371	0.561656	0.0505164	0.16164	0.475407	0.899419
rpsQ	30S ribosomal protein S17 RpsQ	Protein S17 binds specifically to the 5' end of 16S ribosomal RNA.	P9WH51	Rv0710	Mb0730	information pathways	14.741	11	61.5	0	89.529	25.8195	25.9255	26.1415	26.3608	27.7511	26.304	26.0179	26.2589	26.009	28.8465	26.1019	26.3551	0.575752	-1.13897	0.107288	-0.295824	0.499552	-1.00589
pepD	Probable serine protease PepD (serine proteinase) (MTB32B)	Function unknown; possibly hydrolyzes peptides and/or proteins (seems to cleave preferentially after serine residues).	A0A0H3M2W3	Rv0983	Mb1009	Intermediary metabolism and respiration	46.436	1	4.3	0	107.32	25.2163	25.4163	25.4149	24.99	24.8952	25.0741	25.0418	25.2785	25.0752	24.9403	25.1141	24.9194	1.77353	0.357936	0.0200329	-0.00484022	0.661038	0.14056
Rv0250c	Conserved protein	Function unknown. Possibly down-regulated by HSPR|Rv0353.	O53672	Rv0250c	Mb0256c	conserved hypotheticals	10.896	8	82.5	0	175.14	27.2353	27.4958	27.0515	27.7996	28.3096	27.3729	27.7012	27.4233	27.2781	27.3724	26.5471	27.2999	0.253916	0.187768	0.932714	0.754247	0.606279	0.394388
map-1	Methionine aminopeptidase MapA (map) (peptidase M) (MetAP)	Removes the amino-terminal methionine from nascent proteins [catalytic activity: L-methionylpeptide + H2O = L-methionine + peptide].	P9WK21	Rv0734	Mb0755	intermediary metabolism and respiration	27.277	8	52.3	0	151.36	24.1803	22.7309	23.853	24.7486	24.3217	23.1429	23.4311	25.0975	24.7337	23.8983	23.9094	24.62	0.482401	-0.554475	0.0455843	-0.0715052	0.190422	0.278217
oplA	Probable 5-oxoprolinase OplA (5-oxo-L-prolinase) (pyroglutamase) (5-OPASE)	Catalyzes the cleavage of 5-oxo-L-proline to form L-glutamate coupled to the hydrolysis of ATP to ADP and inorganic phosphate [catalytic activity: ATP + 5-oxo-L-proline + 2 H2O = ADP + phosphate + L-glutamate].	P95223	Rv0266c	Mb0272c	intermediary metabolism and respiration	129.65	29	32.6	0	60.554	26.9698	25.1499	24.4185	26.6947	23.6424	26.714	26.1588	25.1041	24.4955	27.2566	25.786	26.1969	0.441199	-0.900393	0.261846	-0.729452	0.821645	-1.16036
tatD	Probable deoxyribonuclease TatD (YJJV protein)	DNase involved in protein export. This sec-independent pathway is termed tat for twin-arginine translocation system. This system mainly transports proteins with bound cofactors that require folding prior to export.	O08343	Rv1008	Mb1035	cell wall and cell processes	29.083	13	60.2	0	99.178	26.72	26.4395	26.4783	27.0272	26.6838	26.2176	26.6717	26.3003	26.5487	27.1617	23.1954	26.9309	0.239544	0.783267	0.269658	0.880196	0.225544	0.744209
fadE6	Probable acyl-CoA dehydrogenase FadE6	Function unknown, but involved in lipid degradation.	P95228	Rv0271c	Mb0277c	lipid metabolism	78.476	38	70.9	0	323.31	29.8234	29.8033	29.7625	29.8905	28.7752	30.1432	29.9427	29.7333	30.1938	29.0331	29.922	29.81	0.302023	0.208024	0.00953345	0.0146135	0.522832	0.368217
mmsA	Probable methylmalonate-semialdehyde dehydrogenase MmsA (methylmalonic acid semialdehyde dehydrogenase) (MMSDH)	Plays a role in valine and pyrimidine metabolism. Binds fatty acyl-CoA [catalytic activity: 2-methyl-3-oxopropanoate + CoA + NAD+ = propanoyl-CoA + CO2 + NADH].	O53816	Rv0753c	Mb0775c	intermediary metabolism and respiration	54.453	31	75.3	0	323.31	31.1777	31.3206	31.1867	31.2629	31.6292	30.9315	30.5933	30.7015	30.72	31.0107	30.6539	30.4664	1.44819	0.517989	1.03063	0.564201	0.08333	-0.0387236
phoP	Possible two component system response transcriptional positive regulator PhoP	Involved in transcriptional mechanism. Part of the two component regulatory system PHOP/PHOQ. This protein is thought to be a positive regulator for the phosphate regulon, required for intracellular growth. Transcription of this operon is positively regulated by PHOB and PHOR|Rv0758 when phosphate is limited.	P71814	Rv0757	Mb0780	regulatory proteins	27.513	12	72.1	0	68.215	26.5102	25.6989	26.2582	24.5762	24.8795	26.6748	26.6346	26.373	26.082	26.5785	26.2707	27.0065	0.652194	-0.462784	0.836402	-1.24173	0.4065	-0.255309
lpqU	Probable conserved lipoprotein LpqU	Unknown	P96378	Rv1022	Mb1050	cell wall and cell processes	25.832	11	51.9	0	147.51	24.5884	24.5394	22.983	25.0178	24.2057	24.4139	23.0981	24.7277	22.8232	22.5148	23.2773	23.7358	0.606693	0.860985	1.47251	1.36982	0.208848	0.373723
Rv0762c	Conserved hypothetical protein	Function unknown	I6XW93	Rv0762c	Mb0785c	conserved hypotheticals	20.614	5	40.9	0	14.047	23.4118	24.5489	22.3966	24.5231	23.5598	24.6899	24.487	25.2571	23.817	23.6266	24.096	22.7024	0.00999791	-0.0225906	0.655835	0.782561	0.830357	1.04533
eccD3	ESX conserved component EccD3. ESX-3 type VII secretion system protein. Probable transmembrane protein.	Unknown	P9WNQ3	Rv0290	Mb0298	cell wall and cell processes	47.943	9	16.3	0	94.31	24.1918	23.6001	24.1249	24.2706	23.3831	23.9477	23.8197	24.7315	22.4171	23.9774	24.175	24.0302	0.170728	-0.0886008	0.29516	-0.193709	0.235535	-0.404799
purD	Probable phosphoribosylamine--glycine ligase PurD (GARS) (glycinamide ribonucleotide synthetase) (phosphoribosylglycinamide synthetase) (5'-phosphoribosylglycinamide synthetase)	Involved in de novo purine biosynthesis (at the second step) [catalytic activity: ATP + 5-phosphoribosylamine + glycine = ADP + phosphate + 5'-phosphoribosylglycinamide].	P9WHM9	Rv0772	Mb0795	intermediary metabolism and respiration	43.508	21	75.8	0	230.48	28.7061	28.7228	28.6951	28.4161	25.5725	28.7015	28.6502	28.5006	28.8569	27.6011	28.3771	28.637	0.74121	0.502932	0.242014	-0.641736	0.638627	0.464146
Rv0296c	Probable sulfatase	Function unknown; probably involved in cellular metabolism.	Q6MX51	Rv0296c	Mb0304c	intermediary metabolism and respiration	51.845	21	68.4	0	124.56	29.1029	29.3818	29.314	29.0846	29.433	29.0118	29.0499	28.8749	29.1653	29.4868	28.915	29.167	0.154433	0.0766315	0.0207932	-0.0131251	0.357787	-0.159549
purB	Probable adenylosuccinate lyase PurB (adenylosuccinase) (ASL) (ASASE)	Involved in de novo purine biosynthesis (at the eight step) [catalytic activity: 1-(5-phosphoribosyl)-4-(N-succino-carboxamide) -5-aminoimidazole = fumarate + 5'-phosphoribosyl-5-amino-4-imidazolecarboxamide (also catalyzes: N6-(1,2-dicarboxyethyl)AMP = fumarate + AMP)].	I6XWA1	Rv0777	Mb0800	intermediary metabolism and respiration	51.04	34	73.7	0	323.31	29.6474	29.7045	29.3973	29.4125	28.6245	29.8683	29.7151	29.4823	29.866	30.1978	29.1885	29.5509	0.0708393	-0.0627155	0.29828	-0.343988	0.0455817	0.0420774
purS	Conserved protein	Function unknown	I6Y8S6	Rv0787A	Mb0811	conserved hypotheticals	8.6217	3	44.3	0	14.224	27.0097	27.146	26.8341	27.2631	26.9599	26.4205	22.9296	26.532	27.0437	24.2784	22.8966	26.6428	1.02264	2.39067	0.949641	2.27525	0.204084	0.895854
Rv0311	Unknown protein	Unknown	O07238	Rv0311	Mb0319	conserved hypotheticals	44.61	6	28.6	0	15.091	23.3472	25.9247	25.1093	23.6944	24.5667	24.3658	25.5261	26.0553	26.0208	26.2774	23.1684	24.8694	0.00612546	0.0219892	0.236306	-0.562787	0.526921	1.09564
cfp29	29 KDa antigen CFP29	Unknown. Supposedly released from the envelope to the outside during growth.	I6WZG6	Rv0798c	Mb0821c	virulence, detoxification, adaptation	28.83	22	83.8	0	323.31	29.5745	29.3687	29.3425	29.4658	29.775	29.8519	29.8283	29.7111	29.1602	30.3413	29.1345	29.366	0.18799	-0.185379	0.0757782	0.0836589	0.037985	-0.0473855
Rv1056	Conserved protein	Function unknown	O53404	Rv1056	Mb1085	conserved hypotheticals	28.945	15	83.9	0	216.82	29.3136	29.1119	29.4407	29.0429	29.1545	29.109	29.3143	29.1321	29.3045	29.8007	29.2127	29.3998	0.387786	-0.182322	0.980027	-0.368926	0.530479	-0.220716
Rv1061	Conserved protein	Function unknown	O53409	Rv1061	Mb1090	conserved hypotheticals	32.037	17	76.7	0	152.47	25.4002	26.4011	26.4698	25.7038	26.2029	26.3333	26.3321	26.3767	26.4278	27.1378	26.404	26.4715	0.625961	-0.580739	0.911612	-0.591104	0.548288	-0.292238
echA9	Possible enoyl-CoA hydratase EchA9 (enoyl hydrase) (unsaturated acyl-CoA hydratase) (crotonase)	Could possibly oxidize fatty acids using specific components [catalytic activity: (3S)-3-hydroxyacyl-CoA = trans-2(or 3)-enoyl-CoA + H(2)O].	O53419	Rv1071c	Mb1100c	lipid metabolism	36.354	20	92.5	0	323.31	31.314	31.4846	31.4021	31.51	30.816	31.5233	31.5434	31.6062	31.5596	31.5116	31.4032	31.4915	0.504094	-0.0685438	0.322935	-0.185633	1.23913	0.10093
rmlA	Alpha-D-glucose-1-phosphate thymidylyltransferase RmlA (dTDP-glucose synthase) (dTDP-glucose pyrophosphorylase)	dTDP-L-rhamnose biosynthesis within the O antigen biosynthesis pathway of lipopolysaccharide biosynthesis [catalytic activity: dTTP + alpha-D-glucose 1-phosphate = diphosphate + dTDP-glucose].	P9WH13	Rv0334	Mb0341	intermediary metabolism and respiration	31.492	9	46.2	0	115.85	27.7289	26.7375	27.4462	28.7262	25.0504	27.8908	28.6925	24.0336	27.673	24.1895	27.5353	27.8231	0.261167	0.788218	0.165087	0.706472	0.0533062	0.283692
mca	Mycothiol conjugate amidase Mca (mycothiol S-conjugate amidase)	Mycothiol-dependent detoxification enzyme, involved in mycothiol biosynthesis.	P9WJN1	Rv1082	Mb1111	virulence, detoxification, adaptation	32.731	19	80.2	0	323.31	28.7472	28.4918	28.7231	28.8769	25.5269	28.6123	28.4044	28.7067	28.5516	24.1628	28.4845	28.482	0.48594	1.61093	0.128403	0.628923	0.450938	1.51112
Rv1109c	Conserved protein	Function unknown	P9WM59	Rv1109c	Mb1139c	conserved hypotheticals	22.987	9	56.6	0	323.31	24.172	27.0881	26.2071	23.5527	27.8216	25.7812	26.3992	22.1749	23.6071	27.4543	23.6072	26.848	0.0338096	-0.147472	0.0502892	-0.25134	0.481992	-1.90948
dnaJ1	Probable chaperone protein DnaJ1	Acts as a co-chaperone. Stimulates, jointly with GRPE|Rv0351, the ATPase activity of DNAK|Rv0350. Seems to be regulated negatively by HSPR (Rv0353 product).	P9WNV9	Rv0352	Mb0360	virulence, detoxification, adaptation	41.315	22	67.1	0	323.31	27.9155	27.3782	27.6724	27.7374	29.0172	28.0397	27.1937	27.6389	27.3557	29.0099	28.1172	27.959	0.910882	-0.706643	0.0670314	-0.097264	1.28636	-0.965915
rip2	Probable conserved integral membrane protein	Unknown	L0T550	Rv0359	Mb0366	cell wall and cell processes	28.151	3	10.4	0	2.6494	23.0729	24.2491	23.7831	23.4881	24.6482	22.999	24.0952	22.9243	24.5921	23.7044	23.4384	24.4	0.119161	-0.145933	0.0849219	-0.135841	0.0132419	0.0228901
narL	Possible nitrate/nitrite response transcriptional regulatory protein NarL	Involved in transcriptional mechanism and regulates nitrate/nitrite.	P9WGM5	Rv0844c	Mb0867c	regulatory proteins	22.916	10	54.6	0	80.66	25.9623	26.0319	26.28	23.9259	26.7107	24.262	26.2253	26.827	25.9907	26.5104	24.1524	26.1304	0.267778	0.493673	0.21484	-0.631523	0.412902	0.749951
Rv0364	Possible conserved transmembrane protein	Unknown	P9WP09	Rv0364	Mb0371	cell wall and cell processes	24.489	5	18.1	0	21.783	22.939	22.9694	23.713	24.261	24.0394	22.7704	22.6951	24.471	24.8506	25.1213	22.7924	23.7132	0.389908	-0.66847	0.0796222	-0.18533	0.04689	0.129953
far	Probable fatty-acid-CoA racemase Far	Function unknown, but involvement in lipid degradation (racemization).	I6Y8Y0	Rv0855	Mb0878	lipid metabolism	38.058	7	29.2	0	21.531	24.1585	24.6454	24.4303	23.7407	24.0906	24.3426	24.1586	23.7623	23.5576	24.3315	23.3877	24.3589	0.479602	0.385349	0.0295183	0.031929	0.212632	-0.199877
mcr	Probable alpha-methylacyl-CoA racemase Mcr (2-methylacyl-CoA racemase) (2-arylpropionyl-CoA epimerase )	Required for bile acid synthesis and for catabolism of branched-chain fatty acids	O06543	Rv1143	Mb1175	lipid metabolism	38.684	9	35.6	0	34.156	27.3876	27.1603	27.5154	27.5222	27.4696	27.4217	27.4069	27.2901	27.5252	27.6701	26.6513	27.4331	0.115131	0.102959	0.28688	0.219692	0.189255	0.155917
fadB	Probable fatty oxidation protein FadB	Involved in fatty acid degradation (probably in fatty acid beta-oxidation cycle).	O53872	Rv0860	Mb0883	lipid metabolism	76.133	63	71.5	0	323.31	32.5324	32.6823	32.614	32.8527	30.7595	32.636	32.7288	32.6759	32.8424	31.238	32.808	32.6693	0.299207	0.371127	0.0651003	-0.155685	0.433546	0.510574
Rv1155	Possible pyridoxamine 5'-phosphate oxidase (PNP/PMP oxidase) (pyridoxinephosphate oxidase) (PNPOX) (pyridoxine 5'-phosphate oxidase)	May be involved in biosynthesis of pyridoxine (vitamin B6) and pyridoxal phosphate. Oxidize PNP and PMP into pyridoxal 5'-phosphate (PLP) [catalytic activity: pyridoxamine 5'-phosphate + H2O + O2 = pyridoxal 5'-phosphate + NH3 + H2O2]	O06553	Rv1155	Mb1186	intermediary metabolism and respiration	16.31	6	56.5	0	13.758	25.4415	25.1064	24.4967	25.5411	25.1687	24.3098	25.3326	25.3401	24.3022	25.4465	25.5203	25.2255	0.588169	-0.382564	0.448164	-0.390874	0.497698	-0.405788
secE2	Possible protein transport protein SecE2	Thought to be involved in protein transport (export).	Q6MX43	Rv0379	Mb0386	cell wall and cell processes	7.9661	7	84.5	0	104.84	28.1491	28.6196	28.9606	28.2546	29.3087	29.0714	28.4771	28.6559	28.925	29.2193	28.1798	28.5015	0.0506829	-0.0570908	0.214547	0.244699	0.0542057	0.052475
mutT2	Probable mutator protein MutT2 (7,8-dihydro-8-oxoguanine-triphosphatase) (8-oxo-dGTPase)	Involved in the go system responsible for removing an oxidatively damaged form of guanine (7,8-dihydro-8-oxoguanine) from DNA and the nucleotide pool. 8-oxo-dGTP is inserted opposite DA and DC residues of template DNA with almost equal efficiency thus leading to A.T to G.C transversions. MUTT2 specifically degrades 8-oxo-dGTP to the monophosphate.	P9WIY1	Rv1160	Mb1192	information pathways	15.16	4	29.8	0	27.687	24.4225	24.2806	24.2191	24.8198	24.7276	23.6291	24.8256	24.5856	24.3375	25.2299	23.6435	25.6801	0.366147	-0.543753	0.250393	-0.458981	0.158779	-0.268228
mog	Probable molybdopterin biosynthesis Mog protein	Involved in molybdopterin biosynthesis; involved in the biosynthesis of a demolybdo-cofactor (molybdopterin), necessary for molybdo-enzymes.	I6Y8Y8	Rv0865	Mb0889	intermediary metabolism and respiration	16.188	4	33.1	0	52.639	26.4821	25.9877	26.6874	25.2787	26.8226	23.2361	22.9384	25.1347	23.6363	25.5664	25.5693	26.8697	0.328301	0.383902	0.324497	-0.889339	1.26292	-2.09866
Rv0870c	Possible conserved integral membrane protein	Unknown	I6Y8Z3	Rv0870c	Mb0894c	cell wall and cell processes	13.688	3	25.6	0	6.1728	24.808	24.3676	24.1099	23.3607	24.4675	23.7008	22.8312	22.9313	25.4539	24.4877	23.3479	24.1441	0.479404	0.435307	0.116133	-0.150218	0.0989397	-0.254421
metZ	Probable O-succinylhomoserine sulfhydrylase MetZ (OSH sulfhydrylase)	Involved in methionine biosynthesis. Converts O-succinylhomoserine into homocysteine.	P9WGB5	Rv0391	Mb0397	intermediary metabolism and respiration	43.345	21	75.9	0	309.87	29.6661	29.6126	29.6997	29.7817	30.3431	29.7639	29.3657	29.4747	29.5984	30.0762	29.3746	29.5994	0.039	-0.0239302	0.424604	0.279487	0.396018	-0.20381
Rv0880	Possible transcriptional regulatory protein (possibly MarR-family)	Thought to be involved in transcriptional mechanism.	P9WMF1	Rv0880	Mb0904	regulatory proteins	15.576	8	66.4	0	33.29	22.7518	25.2574	24.2773	23.4222	25.4574	25.7605	23.7777	25.2903	23.0457	26.0096	24.5907	25.3492	0.661372	-1.22103	0.199894	-0.436458	0.755725	-1.27862
Rv1209	Conserved protein	Function unknown	O05310	Rv1209	Mb1241	conserved hypotheticals	13.121	8	65.6	0	119.69	23.7847	24.5832	25.7343	23.8297	23.4807	23.6391	24.1188	25.0215	24.2725	23.3428	24.1136	24.9198	0.325537	0.575378	0.437136	-0.475575	0.25743	0.345506
gltA2	Probable citrate synthase I GltA2	Involved in tricarboxylic acid cycle (KREBS cycle) [catalytic activity: citrate + CoA = acetyl-CoA + H2O + oxaloacetate].	P9WPD5	Rv0896	Mb0920	intermediary metabolism and respiration	47.948	28	73.1	0	323.31	32.5146	32.6502	32.6513	32.569	32.7932	32.5162	32.5319	32.5866	32.6919	33.0593	32.5934	32.5635	0.329101	-0.133396	0.245077	-0.112617	0.333538	-0.135284
Rv1215c	Conserved protein	Function unknown	O05316	Rv1215c	Mb1247c	conserved hypotheticals	62.626	20	53.5	0	74.261	26.9659	26.6407	26.6313	26.013	26.6084	26.3086	26.5677	26.6342	26.6682	27.9397	27.1425	27.0155	0.936824	-0.61992	1.4572	-1.05591	1.20044	-0.742519
ackA	Probable acetate kinase AckA (acetokinase)	Involved at the first step (of two) in the conversion of acetate to acetyl-CoA [catalytic activity: ATP + acetate = ADP + acetyl phosphate].	P9WQH1	Rv0409	Mb0417	intermediary metabolism and respiration	41.318	16	58.2	0	280.14	25.5755	25.928	26.0736	25.5571	26.4876	25.77	26.2103	26.0699	26.4377	26.3595	25.8678	26.3343	0.685458	-0.32818	0.314589	-0.249018	0.0968186	0.0520624
sigE	Alternative RNA polymerase sigma factor SigE	The sigma factor is an initiation factor that promotes attachment of the RNA polymerase to specific initiation sites and then is released. Seems to be regulated by sigh (Rv3223c product). Seems to regulate the heat-shock response.	P9WGG7	Rv1221	Mb1253	information pathways	28.877	3	17.1	0	35.172	22.9451	23.5098	24.1485	24.996	24.2501	24.2378	23.5924	23.2663	23.1864	24.0158	24.2621	24.3201	0.858734	-0.664832	0.479483	0.295319	2.26752	-0.850941
accD3	Putative acetyl-coenzyme A carboxylase carboxyl transferase (subunit beta) AccD3 (accase beta chain)	This protein is a component of the acetyl coenzyme A carboxylase complex; first, biotin carboxylase catalyzes the carboxylation of the carrier protein and then the transcarboxylase transfers the carboxyl group to form malonyl-CoA [catalytic activity ATP + acetyl-CoA + HCO(3)(-) = ADP + phosphate + malonyl-CoA].	P9WQH9	Rv0904c	Mb0928c	lipid metabolism	51.772	14	41.4	0	191.54	25.8768	26.1094	26.1737	24.4857	25.2894	25.5915	25.6124	25.5741	25.4797	26.3031	25.5277	25.3307	0.46374	0.332795	0.603926	-0.598302	0.214123	-0.165071
xthA	Probable exodeoxyribonuclease III protein XthA (exonuclease III) (EXO III) (AP endonuclease VI)	Involved in base excision repair. Apurinic-apyrimidinic endonuclease. Supposed to remove the damaged DNA at cytosines and guanines by cleaving at the 3' side of the AP site by a beta-elimination reaction. Possibly exhibites 3'-5'-exonuclease, 3'-phosphomonoesterase, 3'-repair diesterase and ribonuclease H activities [catalytic activity: degradation of double-stranded DNA. It acts progressively in…	P96273	Rv0427c	Mb0435c	information pathways	32.108	14	48.5	0	104.86	27.5793	27.4288	27.5885	27.6103	23.8827	27.4988	27.754	27.4061	27.5791	26.8167	27.715	27.8476	0.0777834	0.0724277	0.373643	-1.12914	0.129976	0.119953
mntH	Divalent cation-transport integral membrane protein MntH (BRAMP) (MRAMP)	H(+)-stimulated, highly selective, divalent cation uptake system. Responsible for the translocation of the divalent metal across the membrane.	P9WIZ5	Rv0924c	Mb0948c	cell wall and cell processes	45.004	2	5.6	0	31.266	23.912	23.888	24.4168	23.2618	24.5413	23.717	23.8006	24.7466	24.3928	23.982	22.9249	24.5663	0.185377	0.247887	0.00844609	0.0156422	0.369294	0.488962
Rv1265	Unknown protein	Unknown. Seems to be expressed during macrophage infection.	P9WM49	Rv1265	Mb1296	conserved hypotheticals	25.229	11	55.3	0	27.53	24.3687	24.0085	24.3859	24.3581	24.8083	23.6427	24.0664	22.8778	24.8574	24.6339	24.0269	25.013	0.41314	-0.303583	0.257962	-0.288221	0.4126	-0.624084
lprA	Possible lipoprotein LprA	Unknown	P9WK55	Rv1270c	Mb1301c	cell wall and cell processes	24.874	15	65.2	0	323.31	24.3365	23.5557	23.605	23.0221	25.0717	24.2595	23.6971	23.8351	24.1335	25.6812	23.1644	23.9949	0.223542	-0.447793	0.059192	-0.162444	0.200776	-0.391602
lprC	Possible lipoprotein LprC	Unknown	O86337	Rv1275	Mb1306	cell wall and cell processes	18.87	12	78.3	0	267.12	23.6098	24.178	24.3808	23.4229	26.6857	24.5527	23.0694	25.7419	23.695	22.4143	23.067	24.3303	0.575471	0.785694	0.659772	1.61658	0.384236	0.898216
oppA	Probable periplasmic oligopeptide-binding lipoprotein OppA	Involved in active transport of oligopeptide across the membrane (import). This protein is a component of the oligopeptide permease, a binding protein-dependent transport system; it binds peptides up to five amino acids long with high affinity.	P9WGU5	Rv1280c	Mb1311c	cell wall and cell processes	63.476	28	70.7	0	323.31	23.623	22.6779	23.4825	23.5703	24.6917	23.25	23.6028	23.8148	23.8944	23.5245	23.8998	24.7498	0.787552	-0.796906	0.144298	-0.220709	0.315375	-0.287376
thrB	Probable homoserine kinase ThrB	Threonine biosynthesis from asparate (fourth step) [catalytic activity: ATP + L-homoserine = ADP + O-phospho-L-homoserine].	P9WKE7	Rv1296	Mb1328	intermediary metabolism and respiration	32.346	8	41.1	0	167.13	28.3757	28.4202	28.0955	28.3656	27.9493	28.2864	28.2108	28.1441	28.366	28.289	28.3794	28.4167	0.233829	-0.0645822	0.533978	-0.161289	0.73329	-0.121403
Rv0457c	Probable peptidase	Function unknown; hydrolyzes peptides and/or proteins.	O07178	Rv0457c	Mb0466c	intermediary metabolism and respiration	74.463	37	72.8	0	319.49	29.1584	29.1628	29.3224	29.3251	29.1322	28.8989	29.2316	29.3897	29.5054	29.3276	29.5645	29.4075	1.16739	-0.218653	1.04382	-0.314465	0.211772	-0.0576299
Rv1303	Conserved hypothetical transmembrane protein	Function unknown	P9WM31	Rv1303	Mb1335	cell wall and cell processes	16.895	2	26.1	0	102.6	24.0563	23.6939	23.5838	23.1922	24.4452	24.1481	23.8472	25.0279	24.4606	22.6904	23.9795	23.8866	0.231671	0.259208	0.295902	0.409733	0.796788	0.926421
Rv1314c	Conserved protein	Function unknown	P9WP99	Rv1314c	Mb1347c	conserved hypotheticals	20.694	9	82.9	0	323.31	27.6676	27.4097	27.0517	27.4703	27.7466	27.8747	27.4359	27.2823	26.9622	28.1531	27.0774	27.5892	0.255397	-0.230284	0.0975597	0.0906385	0.485153	-0.379759
lpdC	Dihydrolipoamide dehydrogenase LpdC (lipoamide reductase (NADH)) (lipoyl dehydrogenase) (dihydrolipoyl dehydrogenase) (diaphorase)	Involved in energy metabolism. Lipoamide dehydrogenase is the E3 component of pyruvate dehydrogenase and the alpha-ketoacid dehydrogenase complex [catalytic activity: dihydrolipoamide + NAD(+) = lipoamide + NADH]. Also involved in antioxidant defense; LPDC|Rv0462, DLAT|Rv2215, AHPD|Rv2429, and AHPC|Rv2428 constitute an NADH-dependent peroxidase and peroxynitrite reductase that provides protection…	P9WHH9	Rv0462	Mb0471	intermediary metabolism and respiration	49.239	34	93.3	0	323.31	32.9859	32.875	32.8413	32.9198	33.6855	32.9012	32.962	32.9158	32.9707	33.6258	32.9008	32.925	0.444009	-0.249825	0.0173199	0.0183131	0.350232	-0.20104
Rv0954	Probable conserved transmembrane protein	Unknown	P9WIR9	Rv0954	Mb0979	cell wall and cell processes	30.203	3	14.9	0	19.752	22.9962	23.4998	24.3827	23.3743	23.6892	23.5166	25.0301	24.2762	24.5218	23.8064	23.6596	23.9768	0.171123	-0.188005	1.04556	-0.28753	1.52815	0.795113
icl	Isocitrate lyase Icl (isocitrase) (isocitratase)	Involved in glyoxylate bypass (at the first step), an alternative to the tricarboxylic acid cycle (in bacteria, plants, and fungi) [catalytic activity: isocitrate = succinate + glyoxylate]. Involved in the persistence in the host.	P9WKK7	Rv0467	Mb0476	intermediary metabolism and respiration	47.086	29	80.8	0	323.31	32.2607	32.3972	32.2578	32.8637	31.7393	32.6056	32.3235	32.364	32.3538	31.922	32.2884	32.1868	0.660661	0.172865	0.308868	0.270457	0.912027	0.214705
fadA4	Probable acetyl-CoA acetyltransferase FadA4 (acetoacetyl-CoA thiolase)	Function unknown, but supposed involvement in lipid degradation [catalytic activity: 2 acetyl-CoA = CoA + acetoacetyl-CoA].	P9WG69	Rv1323	Mb1358	lipid metabolism	40.08	24	94.1	0	323.31	32.2614	32.263	32.169	32.3914	32.7813	32.0927	32.1275	32.2615	32.0912	32.5699	32.2778	32.123	0.275633	-0.0924466	0.153852	0.098203	0.508062	-0.163499
cysO	Sulfur carrier protein CysO	Probably involved in cysteine biosynthesis, as sulfur donor in thiocarboxylated form.	P9WP33	Rv1335	Mb1370	intermediary metabolism and respiration	9.5566	6	96.8	0	63.087	26.5102	27.0622	26.7551	23.3538	24.1437	26.8489	26.5663	26.6369	26.8972	26.4906	26.2411	26.3824	1.08496	0.404444	0.681069	-1.58925	1.24591	0.328733
Rv1342c	Conserved membrane protein	Unknown	P9WM19	Rv1342c	Mb1377c	cell wall and cell processes	13.382	4	46.7	0	20.783	23.1233	23.5823	23.1878	23.9508	24.4596	24.1715	25.0883	23.2629	22.8151	24.3241	23.9168	24.0485	1.88788	-0.798704	0.197251	0.097477	0.204994	-0.37439
fadE13	Probable acyl-CoA dehydrogenase FadE13	Function unknown, but involved in lipid degradation.	O86319	Rv0975c	Mb1000c	lipid metabolism	40.747	6	24.6	0	19.674	24.9041	24.719	23.4708	25.1535	24.7735	24.8739	25.11	25.142	25.2255	24.704	22.8771	24.6342	0.145431	0.292877	0.639158	0.8619	0.843231	1.08744
Rv1362c	Possible membrane protein	Function unknown	P9WM01	Rv1362c	Mb1397c	cell wall and cell processes	23.461	6	50	0	56.843	26.7577	23.2426	27.8974	23.3819	23.695	23.7816	23.8691	25.0902	23.8456	26.7923	27.3689	27.2803	0.346806	-1.18122	4.08064	-3.52765	2.51928	-2.87888
pyrC	Probable dihydroorotase PyrC (DHOase)	Involved in pyrimidine biosynthesis (third step) [catalytic activity: (S)-dihydroorotate + H(2)O = N-carbamoyl-L-aspartate]	A0A0H3M3Q3	Rv1381	Mb1416	Intermediary metabolism and respiration	45.24	1	3.5	0	260.39	27.6255	27.6641	27.411	27.2202	27.9633	27.2661	27.4288	28.0321	27.6938	28.37	27.2899	27.523	0.181335	-0.160756	0.236347	-0.244441	0.00832543	-0.00941149
Rv0484c	Probable short-chain type oxidoreductase	Function unknown; possibly involved in cellular metabolism.	P9WGR5	Rv0484c	Mb0494c	intermediary metabolism and respiration	26.416	13	71.3	0	323.31	28.9442	29.2669	29.2691	29.3536	29.0935	29.3432	29.4014	29.3915	29.4477	29.3141	29.0101	29.3366	0.148738	-0.0602214	0.115928	0.0431601	0.84061	0.193259
metG	Methionyl-tRNA synthetase MetS (MetRS) (methionine--tRNA ligase)	It is probably essential for cell survival, being required not only for elongation of protein synthesis but also for the initiation of all mRNA translation through initiator tRNA(fMet) aminoacylation [catalytic activity: ATP + L-methionine + tRNA(met) = AMP + diphosphate + L-methionyl-tRNA(met)]	P9WFU5	Rv1007c	Mb1034c	information pathways	57.993	28	75.1	0	323.31	28.4094	27.8244	28.1018	27.7587	28.5651	28.6312	28.2336	27.2808	28.2336	29.1003	28.3155	28.4149	0.767256	-0.498332	0.320369	-0.291882	0.797609	-0.69423
regX3	Two component sensory transduction protein RegX3 (transcriptional regulatory protein) (probably LuxR-family)	Transcriptional regulatory protein part of the two component regulatory system REGX3/SENX3.	P9WGL9	Rv0491	Mb0501	regulatory proteins	24.879	12	66.5	0	255.95	28.2685	27.7233	28.0946	28.2355	27.8497	28.0432	28.3911	28.5888	28.2837	28.4134	28.2113	28.2994	0.749573	-0.279246	0.988507	-0.265258	0.45717	0.11318
rplY	50S ribosomal protein L25 RplY	Binds to the 50S rRNA	P9WHB5	Rv1015c	Mb1043c	information pathways	22.441	10	49.3	0	323.31	29.9694	29.6105	29.5421	30.0583	30.1944	29.921	30.0623	29.5809	29.5955	30.4039	29.8995	30.14	1.05102	-0.440475	0.210406	-0.0899366	0.869353	-0.40156
proC	Probable pyrroline-5-carboxylate reductase ProC (P5CR) (P5C reductase)	Involved at the terminal (third) step in proline biosynthesis [catalytic activity: L-proline + NAD(P)+ = 1-pyrroline-5-carboxylate + NAD(P)H].	A0A0H3M3S0	Rv0500	Mb0511	Intermediary metabolism and respiration	30.157	1	5.4	0	216.43	29.1631	29.0704	29.0567	29.3519	29.4727	29.2913	29.3032	29.3538	29.1697	29.6811	29.1846	29.2016	0.712258	-0.259017	0.0318998	0.0161997	0.177227	-0.080176
mazG	Conserved protein	Function unknown	P96379	Rv1021	Mb1049	conserved hypotheticals	35.413	11	52	0	55.72	23.7463	24.2503	25.3065	23.3828	22.8127	25.4146	25.126	24.8514	23.6108	24.7184	23.5066	24.3008	0.168305	0.259117	0.129436	-0.305213	0.237879	0.354186
Rv1404	Probable transcriptional regulatory protein	Involved in transcriptional mechanism	P71672	Rv1404	Mb1439	regulatory proteins	17.521	9	49.4	0	81.964	28.0461	27.8269	27.6538	27.7325	27.9794	27.4917	27.5098	27.9052	27.5042	28.2296	26.3204	28.1151	0.173048	0.287273	0.101754	0.179511	0.0458133	0.0847181
Rv0504c	Conserved protein	Function unknown	P9WFK3	Rv0504c	Mb0516c	conserved hypotheticals	18.36	14	91	0	114.63	30.0149	29.9664	29.5591	29.6866	28.9369	29.4842	29.6018	29.627	29.6564	29.2275	29.7894	30.1833	0.133577	0.113406	0.438083	-0.364179	0.139881	-0.105003
lprG	Conserved lipoprotein LprG	Unknown	P9WK45	Rv1411c	Mb1446c	cell wall and cell processes	24.548	12	58.9	0	323.31	24.069	23.6619	23.954	23.6424	27.8317	27.942	24.915	22.6144	25.579	27.0882	23.0878	23.5323	0.204863	-0.674469	0.428252	1.9026	0.0439676	-0.199955
hemD	Probable uroporphyrin-III C-methyltransferase HemD (uroporphyrinogen III methylase) (urogen III methylase) (SUMT) (urogen III methylase) (UROM)	Possibly involved in the biosynthesis of siroheme and cobalamin [catalytic activity: 2 S-adenosyl-L-methionine + uroporphyrin III = 2 S-adenosyl-L-homocysteine + sirohydrochlorin].	Q6MX34	Rv0511	Mb0524	intermediary metabolism and respiration	58.835	6	16.1	0	12.487	23.7605	24.1799	23.8894	22.9685	23.9673	22.584	24.6955	23.1308	23.3826	25.9198	25.1684	25.7687	2.52027	-1.67567	2.18118	-2.44567	1.60714	-1.88266
Rv1417	Possible conserved membrane protein	Unknown	P9WLY1	Rv1417	Mb1452	cell wall and cell processes	16.383	5	41.6	0	39.498	23.9108	23.5047	24.2031	22.2155	22.9521	23.9518	22.5938	24.3081	23.2075	23.1435	23.4524	22.3467	1.08459	0.892017	0.033113	0.0589797	0.25794	0.388942
Rv1425	Possible triacylglycerol synthase (diacylglycerol acyltransferase)	May be involved in synthesis of triacylglycerol	P9WKC1	Rv1425	Mb1460	lipid metabolism	50.078	10	34.6	0	24.092	23.1895	23.8257	23.8575	24.4875	25.6453	22.8681	23.1107	23.2374	23.6981	24.2185	23.0677	22.4302	0.272658	0.385418	0.497648	1.09483	0.0695275	0.109945
Rv0528	Probable conserved transmembrane protein	Unknown	O06394	Rv0528	Mb0541	cell wall and cell processes	57.13	11	36.5	0	43.403	24.0735	22.4374	24.0638	22.4142	25.0966	23.4209	23.2842	22.8493	23.4568	22.7797	23.5241	23.9183	0.0641001	0.117559	0.0998044	0.236584	0.215629	-0.210555
menA	1,4-dihydroxy-2-naphthoate octaprenyltransferase MenA (DHNA-octaprenyltransferase)	Involved in menaquinone biosynthesis. Conversion of 1,4-dihydroxy-2-naphthoate (DHNA) to dimethylmenaquinone (DMK). Attaches octaprenylpyrophosphate, a membrane-bound 40-carbon side chain to DHNA. The conversion of DHNA to DMK proceeds in three stages: the removal of the carboxyl group of DHNA as CO2, the attachment of the isoprenoid side chain, and a quinol-to-quinone oxidation, which is thought…	P9WIP3	Rv0534c	Mb0548c	intermediary metabolism and respiration	30.014	3	9.9	0	11.734	25.0751	22.9571	22.9705	25.265	23.8664	23.9947	23.8067	22.3348	24.3065	23.3645	24.0153	24.0048	0.0599576	-0.127323	0.513669	0.58049	0.189748	-0.312215
bisC	Probable biotin sulfoxide reductase BisC (BDS reductase) (BSO reductase)	This enzyme may serve as a scavenger, allowing the cell to utilize biotin sulfoxide as a biotin source	O06817	Rv1442	Mb1477	intermediary metabolism and respiration	83.389	9	16.1	0	23.628	29.2201	29.822	30.0133	27.572	26.6037	29.6859	30.2114	29.8435	30.2328	30.1342	23.3027	29.0058	0.445213	2.20427	0.0719956	0.472967	0.545847	2.61502
zwf2	Probable glucose-6-phosphate 1-dehydrogenase Zwf2 (G6PD)	Involved in pentose phosphate pathway [catalytic activity: D-glucose 6-phosphate + NADP(+) = D-glucono- 1,5-lactone 6-phosphate + NADPH]	P9WN73	Rv1447c	Mb1482c	intermediary metabolism and respiration	57.342	30	69.3	0	254.84	28.4379	28.4376	28.5403	29.1721	24.0816	28.932	28.8985	28.5056	28.5121	22.8064	28.6521	28.6385	0.383082	1.77297	0.0975298	0.696292	0.424466	1.93976
qor	Probable quinone reductase Qor (NADPH:quinone reductase) (zeta-crystallin homolog protein)	Catalyzes the one electron reduction of certain quinones [catalytic activity: NADPH + quinone = NADP+ + semiquinone]	O53146	Rv1454c	Mb1489c	intermediary metabolism and respiration	34.046	22	84.1	0	323.31	30.4881	30.3131	30.468	30.353	29.4972	30.3779	30.4799	30.4625	30.3162	29.9001	30.3747	30.3882	0.523205	0.202052	0.164907	-0.144957	0.516416	0.198524
gpsA2	Probable glycerol-3-phosphate dehydrogenase [NAD(P)+] GpdA1 (NAD(P)H-dependent glycerol-3-phosphate dehydrogenase) (NAD(P)H-dependent dihydroxyacetone-phosphate reductase)	Involved in de novo phospholipid biosynthesis; glycerol-3 phosphate formation [catalytic activity: SN-glycerol 3-phosphate + NAD(P)+ = glycerone phosphate + NAD(P)H].	P9WN75	Rv0564c	Mb0579c	lipid metabolism	36.153	10	48.1	0	151.09	24.7818	23.6675	24.7992	24.5871	22.7741	25.3574	25.957	24.3367	24.9511	24.8026	24.7165	25.4207	0.577045	-0.563759	0.391908	-0.740364	0.0680427	0.101683
Rv1459c	Possible conserved integral membrane protein	Unknown	O53150	Rv1459c	Mb1494c	cell wall and cell processes	62.693	6	13.4	0	15.16	23.9169	24.1191	24.2165	24.2288	24.7907	23.3449	23.7668	24.3745	24.5711	23.674	23.7858	24.1657	0.532248	0.208984	0.214324	0.246269	0.56644	0.362279
csd	Probable cysteine desulfurase Csd	Catalyzes the removal of elemental sulfur and selenium atoms from L-cysteine, L-cystine, L-selenocysteine, and L-selenocystine to produce L-alanine	P9WQ69	Rv1464	Mb1499	intermediary metabolism and respiration	44.596	35	97.4	0	323.31	31.3913	31.6085	31.6851	31.3272	31.8713	31.44	31.6286	31.5826	31.5243	31.8687	31.1619	31.4601	0.104604	0.0647475	0.0650627	0.0492458	0.146493	0.0815913
Rv1060	Unknown protein	Unknown	O53408	Rv1060	Mb1089	conserved hypotheticals	16.866	10	79	0	155.52	24.067	23.2527	23.1842	23.2722	23.5263	24.622	23.8513	23.8965	23.7429	24.4504	22.8207	23.6186	0.0828123	-0.128599	0.101435	0.17695	0.158989	0.200371
Rv0580c	Conserved protein	Function unknown	O53777	Rv0580c	Mb0595c	conserved hypotheticals	18.035	19	84.7	0	323.31	26.2877	27.6119	27.3604	27.7366	27.895	28.8182	26.8467	27.0629	27.3506	28.0977	27.4655	28.0489	0.797943	-0.784028	0.286283	0.279241	1.45565	-0.783953
echA8	Probable enoyl-CoA hydratase EchA8 (enoyl hydrase) (unsaturated acyl-CoA hydratase) (crotonase)	Could possibly oxidize fatty acids using specific components [catalytic activity: (3S)-3-hydroxyacyl-CoA = trans-2(or 3)-enoyl-CoA + H(2)O].	P9WNN9	Rv1070c	Mb1099c	lipid metabolism	27.273	17	55.6	0	323.31	30.4538	30.4261	30.2832	30.4796	31.0076	30.219	30.3691	30.5668	30.3831	31.213	30.2408	30.5114	0.381684	-0.267385	0.0822343	-0.0863196	0.294162	-0.215392
inhA	NADH-dependent enoyl-[acyl-carrier-protein] reductase InhA (NADH-dependent enoyl-ACP reductase)	This isozyme is involved in mycolic acid biosynthesis. Second reductive step in fatty acid biosynthesis. Involved in the resistance against the antituberculosis drugs isoniazid and ethionamide [catalytic activity: acyl-[acyl-carrier protein] + NAD(+) = trans-2,3-dehydroacyl-[acyl-carrier protein] + NADH].	P9WGR1	Rv1484	Mb1520	lipid metabolism	28.528	15	90.3	0	182.7	27.9522	25.6749	26.6099	27.0246	26.1893	27.3358	27.7913	26.1678	27.1145	25.872	28.0361	28.1528	0.241414	-0.608	0.243534	-0.503733	0.138518	-0.329129
Rv1106c	3-beta-hydroxysteroid dehydrogenase	Oxidizes 3-beta-hydroxysterols using NAD+ as cofactor	P9WQP7	Rv1106c	Mb1136c	intermediary metabolism and respiration	40.741	7	31.6	0	108.87	26.8774	23.7038	23.1331	23.6652	23.8857	26.9076	26.4592	24.1416	26.4337	24.2644	26.4535	26.6972	0.369138	-1.23366	0.309025	-0.985568	0.0395521	-0.126898
galTb	Probable galactose-1-phosphate uridylyltransferase GalTb [second part]	Involved in galactose metabolism (leloir pathway) [catalytic activity: UTP + alpha-D-galactose 1-phosphate = diphosphate + UDP-galactose].	Q79FY3	Rv0619	Mb0635	intermediary metabolism and respiration	43.453	5	16	0	46.373	24.8401	24.9126	25.2378	24.905	23.6702	24.393	24.8006	23.6775	24.9291	25.45	24.6014	25.0712	0.0554345	-0.0440451	0.760773	-0.718172	0.5404	-0.57181
Rv1117	Conserved protein	Function unknown	O06569	Rv1117	Mb1148	conserved hypotheticals	12.049	7	86	0	31.498	25.0299	25.2183	24.7049	24.9954	24.9556	24.467	24.4558	24.7672	24.6191	24.6524	23.8681	23.972	1.33235	0.820198	1.00748	0.641839	0.793261	0.449852
gnd2	Probable 6-phosphogluconate dehydrogenase, decarboxylating Gnd2	Involved in hexose monophosphate shunt (pentose phosphate pathway). [catalytic activity: 6-phospho-D-gluconate + NADP+ = D-ribulose 5-phosphate + CO2 + NADPH]	O06574	Rv1122	Mb1153	intermediary metabolism and respiration	36.358	24	74.4	0	323.31	30.2054	30.3877	30.351	30.4194	31.0024	30.2638	30.2882	30.2225	30.4365	30.8358	30.0388	30.4128	0.184236	-0.11443	0.154223	0.132741	0.180679	-0.113379
Rv0634A	Unknown protein	Unknown	P9WKS5	Rv0634A	Mb0652	conserved hypotheticals	9.4264	6	65.1	0	95.321	28.0587	28.6327	28.6602	28.5144	29.0604	27.314	28.0192	28.5015	27.3532	27.2968	26.3551	27.1484	1.9015	1.51713	1.08061	1.36285	1.08728	1.02455
nusG	Probable transcription antitermination protein NusG	Influences transcription termination and antitermination. Acts as a component of the transcription complex, and interacts with the termination factor rho and RNA polymerase.	P9WIU9	Rv0639	Mb0658	information pathways	25.446	14	65.1	0	323.31	30.5476	30.724	30.5678	30.686	30.739	30.334	30.4517	30.6374	30.467	30.7969	30.5463	30.5526	0.0658625	-0.0188192	0.108779	-0.0455996	0.484072	-0.113232
Rv1132	Conserved membrane protein	Unknown	O06583	Rv1132	Mb1163	cell wall and cell processes	64.019	4	7.8	0	6.7129	23.2921	23.0878	23.35	24.9411	24.3312	24.2337	23.6424	23.7324	23.9671	23.9214	23.7541	23.7376	2.32276	-0.561056	1.4184	0.697628	0.0734577	-0.023702
rplL	50S ribosomal protein L7/L12 RplL (SA1)	Involved in translation mechanisms: seems to be the binding site for several of the factors involved in protein synthesis and appears to be essential for accurate translation.	P9WHE3	Rv0652	Mb0671	information pathways	13.44	20	63.1	0	323.31	31.5592	31.6934	31.3871	31.7737	32.9495	31.2762	31.3247	31.6543	31.4973	32.4666	31.1105	31.6438	0.182575	-0.193757	0.152909	0.259476	0.241232	-0.248205
echA5	Probable enoyl-CoA hydratase EchA5 (enoyl hydrase) (unsaturated acyl-CoA hydratase) (crotonase)	Could possibly oxidize fatty acids using specific components [catalytic activity: (3S)-3-hydroxyacyl-CoA = trans-2(or 3)-enoyl-CoA + H(2)O].	I6Y4E8	Rv0675	Mb0694	lipid metabolism	27.441	13	50.2	0	108.12	28.7691	28.4023	28.3037	28.4906	28.5294	28.5589	28.6198	28.4791	28.6464	28.966	28.1208	28.7054	0.13579	-0.105707	0.101959	-0.0711066	0.0204255	-0.0156473
mftD	Possible L-lactate dehydrogenase (cytochrome) LldD1	Involved in respiration; catalyzes conversion of lactate into pyruvate [catalytic activity: (S)-lactate + 2 ferricytochrome C = pyruvate + 2 ferrocytochrome C].	P9WND7	Rv0694	Mb0713	intermediary metabolism and respiration	42.161	14	58.1	0	54.934	25.9278	25.6712	25.4262	23.2559	24.7055	25.681	25.6376	25.0976	25.2763	24.1426	25.9846	25.6313	0.293459	0.422234	0.320362	-0.705372	0.0493634	0.0843563
hisH	Probable amidotransferase HisH	Histidine biosynthesis pathway (fifth step). Catalyzes an amidotransferase reaction that generates imidazole-glycerol phosphate and 5-aminoimidazol-4-carboxamide ribonucleotide, which is used for purine synthesis.	P9WMM1	Rv1602	Mb1628	intermediary metabolism and respiration	21.445	7	50.5	0	98.983	28.2055	28.3094	28.3358	27.8717	26.5453	28.4019	28.6431	28.3597	28.317	27.925	28.261	28.5431	0.0779956	0.0405293	0.475977	-0.636687	0.405528	0.196913
Rv0713	Probable conserved transmembrane protein	Unknown	I6WZ58	Rv0713	Mb0734	cell wall and cell processes	33.925	8	36.7	0	94.93	23.5501	24.0454	24.7247	23.6778	24.1499	22.6868	23.9936	22.8952	24.6468	23.008	24.0475	24.2733	0.253539	0.330455	0.177347	-0.271422	0.036326	0.0689208
fadD36	Probable fatty-acid-CoA ligase FadD36 (fatty-acid-CoA synthetase) (fatty-acid-CoA synthase)	Function unknown, but supposedly involved in lipid degradation.	O05295	Rv1193	Mb1225	lipid metabolism	49.52	18	57.5	0	318.45	29.7468	29.7193	29.7121	29.5935	24.1908	29.6021	29.6468	29.6263	29.782	27.0644	29.7503	29.6693	0.436244	0.898087	0.197919	-1.03253	0.412381	0.857081
Rv0730	GCN5-related N-acetyltransferase	Acetylation, substrate unknown	I6XW38	Rv0730	Mb0751	intermediary metabolism and respiration	25.98	24	88.4	0	323.31	30.1336	29.952	30.1927	29.9053	29.3611	30.2532	30.1203	30.2059	30.3092	29.9084	30.1749	30.3807	0.149039	-0.0619043	0.463866	-0.314817	0.144083	0.057148
Rv1610	Possible conserved membrane protein	Unknown	O06128	Rv1610	Mb1636	cell wall and cell processes	24.618	6	34.9	0	36.638	23.6423	23.8182	23.4905	23.5745	23.9336	23.4218	23.0353	23.3208	24.8127	23.7403	23.5786	23.2658	0.293647	0.122105	0.217403	0.115047	0.125403	0.194694
Rv0737	Possible transcriptional regulatory protein	Involved in transcriptional mechanism.	I6Y8K3	Rv0737	Mb0758	regulatory proteins	18.078	3	17.6	0	3.9159	23.5371	23.9517	23.4098	23.0269	23.689	22.6565	24.1544	24.1167	24.3634	23.9747	23.0752	24.3736	0.157021	-0.174971	0.630351	-0.683669	0.442698	0.403671
tesB1	Probable acyl-CoA thioesterase II TesB1	Involved in fatty acid metabolism.	O06135	Rv1618	Mb1644	lipid metabolism	33.148	9	60	0	60.162	26.0372	26.9792	26.5707	22.7516	22.9718	26.3585	26.6291	26.3263	26.6063	26.4139	26.3272	26.6922	0.0604376	0.0512702	0.979491	-2.45047	0.104902	0.0427888
Rv0760c	Conserved protein	Function unknown	I6WZD7	Rv0760c	Mb0783c	conserved hypotheticals	15.242	10	87.8	0	148.73	27.5711	27.8243	27.5833	27.383	27.3584	27.4123	27.6048	27.5686	27.4749	28.053	27.3554	27.6452	0.0388031	-0.0249666	0.67065	-0.299942	0.261344	-0.13507
Rv1231c	Probable membrane protein	Unknown	O86314	Rv1231c	Mb1263c	cell wall and cell processes	20.445	8	33.3	0	28.134	23.5714	24.1894	24.1523	23.5617	24.2897	23.218	25.2279	24.4893	23.7078	24.3923	24.6049	22.0746	0.122758	0.28042	0.000291543	-0.000778198	0.353958	0.784379
Rv0770	Probable dehydrogenase/reductase	Function unknown; 3-hydroxyisobutyrate dehydrogenase family protein probably involved in cellular metabolism.	P9WNY3	Rv0770	Mb0793	intermediary metabolism and respiration	30.445	14	66.4	0	199.95	28.3022	28.5267	28.4807	28.4033	28.7999	28.4144	28.4966	28.5509	28.6528	28.8078	28.5562	28.5556	0.873301	-0.203306	0.258286	-0.10066	0.312227	-0.0731144
relB	Antitoxin RelB	Function unknown	O50462	Rv1247c	Mb1279c	virulence, detoxification, adaptation	9.7669	3	36	0	13.65	22.7945	23.992	23.729	23.7579	24.518	22.9661	24.5352	24.6243	24.2618	23.6422	23.9879	22.9744	0.0210552	-0.0296555	0.146942	0.212461	1.38296	0.938929
cydA	Probable integral membrane cytochrome D ubiquinol oxidase (subunit I) CydA (cytochrome BD-I oxidase subunit I)	Involved in the respiratory chain (at the terminal step): aerobic respiration. Cytochrome D terminal oxidase complex is the component of the aerobic respiratory chain that is supposedly predominant when cells are grown at low aeration [catalytic activity: ubiquinol-8 + O(2) = ubiquinone-8 + H(2)O].	L7N662	Rv1623c	Mb1649c	intermediary metabolism and respiration	53.826	7	18.6	0	28.632	24.2093	23.5221	24.1428	24.4051	23.5027	23.3015	24.5032	24.0331	23.6965	24.2081	24.0882	23.8923	0.166431	-0.104818	0.391818	-0.326464	0.0194548	0.0146949
ptrBb	Probable protease II PtrBb [second part] (oligopeptidase B)	Cleaves peptide bonds on the C-terminal side of lysyl and argininyl residues [catalytic activity: hydrolysis of ARG-|-XAA and LYS-|-XAA bonds in oligopeptides, even when P1' residue is proline].	P71834	Rv0782	Mb0804	intermediary metabolism and respiration	80.381	40	62	0	237.53	29.069	29.2143	29.3595	28.1487	28.3978	28.911	29.1656	28.9792	29.2676	29.7405	28.8112	29.2755	0.076978	-0.0614707	1.0614	-0.789888	0.187949	-0.138266
Rv0786c	Conserved protein	Function unknown	P71839	Rv0786c	Mb0809c	conserved hypotheticals	13.949	2	32.6	0	4.2233	24.2196	23.6304	24.2922	24.28	23.582	24.2499	25.0935	23.1254	25.0075	25.3796	22.9243	23.2019	0.0942308	0.21214	0.0887864	0.202037	0.222123	0.573544
Rv1264	Adenylyl cyclase (ATP pyrophosphate-lyase) (adenylate cyclase)	Possibly involved in cAMP synthesis [catalytic activity: ATP = 3',5'-cyclic AMP + diphosphate]. Activity is PH-dependent. Inhibited by polyphosphates.	P9WMU9	Rv1264	Mb1295	intermediary metabolism and respiration	42.232	14	51.4	0	42.237	22.6474	23.355	24.1606	23.3963	23.9388	25.2217	24.3921	25.1637	23.702	24.2591	24.8152	23.5619	0.657113	-0.824375	0.0134235	-0.0264441	0.137583	0.207239
Rv1269c	Conserved probable secreted protein	Unknown	P9WM45	Rv1269c	Mb1300c	cell wall and cell processes	12.55	3	30.6	0	3.4122	23.7634	23.1661	24.0242	23.7189	23.8465	23.9131	24.356	23.9917	24.2016	24.0586	23.1506	24.4973	0.205961	-0.250937	0.0661328	-0.0760167	0.274748	0.280945
lprB	Possible lipoprotein LprB	Unknown	P9WK53	Rv1274	Mb1305	cell wall and cell processes	19.739	3	29.2	0	110.79	23.7763	21.8258	24.8748	24.4626	24.0447	24.4486	23.7602	23.756	24.6912	24.2432	23.4052	23.6797	0.111047	-0.283703	0.896864	0.542639	0.299929	0.293114
Rv0802c	Possible succinyltransferase in the GCN5-related N-acetyltransferase family	Succinylation, substrate unknown	P9WQG7	Rv0802c	Mb0825c	intermediary metabolism and respiration	24.983	11	50.9	0	106.28	26.5952	26.5161	26.309	26.33	23.5987	26.3312	26.3561	26.2428	26.348	24.0684	26.6898	26.5009	0.352959	0.720357	0.0959571	-0.333095	0.266067	0.56258
Rv1279	Probable dehydrogenase FAD flavoprotein GMC oxidoreductase	Function unknown; probably involved in cellular metabolism, probably electron-transfer-linked.	P9WMV5	Rv1279	Mb1310	intermediary metabolism and respiration	57.331	15	34.5	0	133.01	25.8239	25.7432	25.7176	25.6665	25.3016	26.0819	26.2411	25.5985	26.2287	26.2894	25.8374	25.996	0.960465	-0.279428	0.614252	-0.357649	0.0243394	-0.0181942
mtcA1	Beta-carbonic anhydrase	Catalyzes reversible dehydration of CO2 to form bicarbonate	P9WPJ7	Rv1284	Mb1315	intermediary metabolism and respiration	18.189	12	74.2	0	65.296	27.8852	28.1508	28.2389	28.19	29.0796	28.3181	27.7867	27.9885	27.8924	28.1817	27.2353	27.9442	0.429001	0.304555	0.869014	0.742139	0.129203	0.102112
sseC2	Conserved hypothetical protein SseC2	Thought to be involved in sulphur metabolism.	P0CG95	Rv0814c	Mb0837c	intermediary metabolism and respiration	10.165	7	94	0	323.31	30.7588	31.7027	31.356	31.1321	31.9168	31.0278	31.1526	31.2283	31.2223	31.4784	30.9573	31.1663	0.080646	0.0718409	0.190008	0.158269	0.000885478	0.000416438
thrC	Threonine synthase ThrC (ts)	Involved in threonine biosynthesis [catalytic activity: O-phospho-L-homoserine + H(2)O = L-threonine + phosphate]	P9WG59	Rv1295	Mb1327	intermediary metabolism and respiration	37.321	26	96.7	0	323.31	31.0087	31.1832	31.14	31.1773	31.7154	31.1176	31.1076	31.2352	31.1346	31.4304	30.9243	31.0282	0.0352858	-0.0170002	0.355354	0.209126	0.0691126	0.0314725
Rv0825c	Conserved protein	Function unknown	O53836	Rv0825c	Mb0848c	conserved hypotheticals	23.442	7	46.9	0	61.298	23.923	23.6519	23.6414	24.5401	23.8269	23.8204	24.0471	23.7302	23.756	24.1855	23.9399	24.2594	1.36317	-0.389493	0.0910166	-0.0658169	0.947288	-0.283818
Rv1683	Possible bifunctional enzyme; long-chain acyl-CoA synthase and lipase.	Supposed involvement in lipid biosynthesis and degradation	O33185	Rv1683	Mb1710	lipid metabolism	107.39	37	52	0	185.8	26.3526	24.8059	23.2669	26.0172	23.8164	27.5332	25.6815	24.468	25.9272	25.3903	26.4765	26.3165	0.586724	-1.25261	0.085318	-0.272167	0.551172	-0.702195
Rv0831c	Conserved protein	Function unknown	O53842	Rv0831c	Mb0854c	conserved hypotheticals	30.189	18	87.5	0	318.24	29.4696	28.8574	28.883	29.2129	29.8737	29.3349	29.2695	28.7443	29.1109	29.6956	29.1429	29.5056	0.665875	-0.378033	0.0335168	0.025781	0.839737	-0.4065
tyrS	Probable tyrosyl-tRNA synthase TyrS (TYRRS)	Involved in translation mechanism [catalytic activity: ATP + L-tyrosine + tRNA(TYR) = AMP + diphosphate + L-tyrosyl-tRNA(TYR)]	P9WFT1	Rv1689	Mb1715	information pathways	46.33	22	66.3	0	215.88	28.8376	27.4565	27.8069	28.3831	24.9394	28.0724	27.6816	27.3216	27.9137	28.0377	28.5623	28.0876	0.164735	-0.195548	0.420585	-1.09754	1.15635	-0.590234
Rv1322A	Conserved protein	Function unknown	L7N6B1	Rv1322A	Mb1357c	conserved hypotheticals	16.626	8	50	0	51.27	27.0935	24.6595	23.4305	27.8802	24.6663	24.0718	25.9885	23.4741	26.4564	23.3973	23.8187	26.8921	0.0822963	0.358444	0.199294	0.836748	0.157137	0.603649
Rv1700	NUDIX hydrolase	NUDIX hydrolases catalyze the hydrolysis of a variety of nucleoside diphoshate derivatives	I6X235	Rv1700	Mb1726	information pathways	22.893	9	65.7	0	36.479	26.766	26.8502	26.3437	26.5004	26.8925	26.9381	26.7041	26.7256	26.3213	26.1033	26.9568	26.6939	0.081636	0.0686264	0.266869	0.192333	0.00114502	-0.000998815
glgP	Probable glycogen phosphorylase GlgP	Phosphorylase is an important allosteric enzyme in carbohydrate metabolism. Enzymes from different sources differ in their regulatory mechanisms and in their natural substrates. However, all known phosphorylases share catalytic and structural properties [catalytic activity: {(1,4)-alpha-D-glucosyl}(N) + phosphate = {(1,4)-alpha-D-glucosyl}(N-1) + alpha-D-glucose 1-phosphate].	P9WMW1	Rv1328	Mb1363	intermediary metabolism and respiration	95.52	52	68.9	0	323.31	31.997	31.7103	31.5861	31.4302	30.3615	31.8358	31.7494	31.3282	31.6979	30.6935	31.9299	31.8127	0.278562	0.285718	0.17285	-0.269583	0.0974345	0.113122
mec	Possible hydrolase	Possibly involved in cysteine biosynthesis. Generates cysteine from hydrolysis of CysO-CYS.	P9WHS1	Rv1334	Mb1369	intermediary metabolism and respiration	16.529	7	66.4	0	138.23	25.0332	25.5676	25.0217	25.6707	26.1056	25.2544	25.2602	26.1251	25.2641	25.5917	25.5315	25.4711	0.817825	-0.323957	0.229671	0.145465	0.0211213	0.0183557
dapC	Probable N-succinyldiaminopimelate aminotransferase DapC (DAP-at)	Involved in biosynthesis of diaminopimelate and lysine from aspartate semialdehyde (at the fourth step) [catalytic activity: L-glutamate + N-succinyl-2-amino-6-ketopimelate = 2-oxoglutarate + N-succinyl-L,L-2,6-diaminopimelate	P9WPZ5	Rv0858c	Mb0881c	intermediary metabolism and respiration	42.209	10	37.5	0	34.271	25.63	25.8716	25.9382	25.8345	26.4496	25.7094	26.0072	25.7933	26.1147	26.4629	25.486	25.8013	0.125129	-0.103474	0.077678	0.0811011	0.0630694	0.054973
Rv1341	Conserved protein	Function unknown	P9WMR7	Rv1341	Mb1376	conserved hypotheticals	21.016	4	37.3	0	53.337	23.9042	23.5405	23.4117	23.7908	24.3078	24.7239	23.012	24.1932	24.4259	23.5996	23.2929	23.9069	0.0276794	0.019008	0.978878	0.674381	0.230117	0.277226
fadE10	Probable acyl-CoA dehydrogenase FadE10	Function unknown, but involved in lipid degradation.	P9WQF7	Rv0873	Mb0897	lipid metabolism	70.744	52	87.2	0	323.31	29.1417	28.5848	28.7884	29.0794	28.2539	29.4776	29.0732	28.6036	28.7328	29.1982	29.2733	29.6128	1.18984	-0.52317	0.482719	-0.424458	1.376	-0.55826
Rv1738	Conserved protein	Function unknown	P9WLS3	Rv1738	Mb1767	conserved hypotheticals	10.606	5	50	0	151.47	28.0272	27.9665	27.8776	27.6747	27.8505	27.7803	27.67	27.6663	28.4876	28.3032	27.4038	28.5306	0.129302	-0.122103	0.374521	-0.310696	0.113925	-0.137899
pknE	Probable transmembrane serine/threonine-protein kinase E PknE (protein kinase E) (STPK E)	Involved in signal transduction (via phosphorylation). Thought to be involved in membrane transport [catalytic activity: ATP + a protein = ADP + a phosphoprotein].	P9WI77	Rv1743	Mb1772	regulatory proteins	60.512	20	55.7	0	138.11	24.3186	24.5841	23.2975	24.6483	24.7286	24.7626	23.1755	23.6945	24.2348	23.6063	24.1629	24.3848	0.0111599	0.0154095	1.32387	0.661817	0.383513	-0.349722
Rv1762c	Unknown protein	Unknown	O06797	Rv1762c	Mb1793c	conserved hypotheticals	28.754	8	48.9	0	18.756	24.9089	24.674	23.33	24.418	24.9869	24.4422	24.9901	23.5522	24.2616	24.9173	24.4411	24.7526	0.320221	-0.39937	0.140135	-0.0879854	0.424683	-0.435706
prrB	Two component sensor histidine kinase PrrB	Sensor part of the two component regulatory system PRRA/PRRB. Thought to be involved in the environmental adaptation, specifically in an early phase of the intracellular growth.	P9WGK7	Rv0902c	Mb0926c	regulatory proteins	47.829	20	59.2	0	133.88	23.6977	25.0687	22.4692	23.8101	24.2233	23.174	24.5124	23.4228	22.8849	23.1201	24.1288	24.2189	0.0314657	-0.0774193	0.0648367	-0.0867945	0.133841	-0.215908
Rv1780	Conserved protein	Function unknown	O53931	Rv1780	Mb1809	conserved hypotheticals	20.456	10	65.2	0	40.87	25.3228	23.8864	24.6964	25.0135	22.4201	24.3037	25.5235	24.5916	23.8581	24.2347	25.7962	25.7422	0.399526	-0.622555	0.656333	-1.3453	0.355124	-0.60001
ribD	Probable bifunctional riboflavin biosynthesis protein RibG : diaminohydroxyphosphoribosylaminopyrimidine deaminase (riboflavin-specific deaminase) + 5-amino-6-(5-phosphoribosylamino) uracil reductase (HTP reductase)	Involved in riboflavin biosynthesis (at the second and third steps). Converts 2,5-diamino-6-(ribosylamino)-4(3H)-pyrimidinone 5'-phosphate into 5-amino-6-(ribosylamino)-2,4(1H,3H)-pyrimidinedione 5'-phosphate [catalytic activity 1: 2,5-diamino-6-hydroxy-4-(5-phosphoribosylamino)pyrimidine + H(2)O = 5-amino-6-(5-phosphoribosylamino)uracil + NH(3)] [catalytic activity 2: 5-amino-6-(5-phosphoribityl…	P9WPH1	Rv1409	Mb1444	intermediary metabolism and respiration	35.382	21	86.7	0	224.86	27.5081	26.8034	27.1029	27.3473	25.0866	28.114	28.1304	27.1566	27.5154	27.3904	27.8415	28.0236	1.038	-0.613692	0.413577	-0.902502	0.167043	-0.151027
mycP5	Probable proline rich membrane-anchored mycosin MycP5 (serine protease) (subtilisin-like protease) (subtilase-like) (mycosin-5)	Thought to have proteolytic activity.	O53945	Rv1796	Mb1824	intermediary metabolism and respiration	60.027	16	45.6	0	223.95	23.4249	24.0129	23.1283	24.5434	23.9584	24.2302	23.7361	22.8483	23.4025	24.007	23.9714	23.2901	0.268186	-0.234154	0.780923	0.487811	0.541381	-0.427195
Rv0927c	Probable short-chain type dehydrogenase/reductase	Function unknown; possibly involved in cellular metabolism.	P9WGQ5	Rv0927c	Mb0950c	intermediary metabolism and respiration	26.745	20	88.6	0	323.31	30.3609	30.3392	30.3619	30.2201	29.951	30.1761	30.3133	30.2834	30.178	30.2518	30.3648	30.2334	0.779922	0.0706298	0.837116	-0.167631	0.162653	-0.0251268
pknD	Transmembrane serine/threonine-protein kinase D PknD (protein kinase D) (STPK D)	Involved in signal transduction (via phosphorylation). Thought to regulate phosphate transport. Can phosphorylate the peptide substrate myelin basic protein (MBP) at serine and threonine residues. Can be autophosphorylated on threonine residues [catalytic activity: ATP + a protein = ADP + a phosphoprotein].	A0A0H3M4R9	Rv0931c	Mb0955c	Regulatory proteins	31.428	1	6.5	0	44.46	23.4278	22.6236	24.0683	24.6176	23.4189	24.6407	24.4602	23.9135	23.3914	24.0321	24.5184	24.7274	1.06179	-1.05272	0.166624	-0.200209	0.609708	-0.504283
Rv1424c	Possible membrane protein	Unknown	P9WLX7	Rv1424c	Mb1459c	cell wall and cell processes	27.427	5	18.2	0	31.086	23.0519	23.2	24.2744	24.3748	23.6698	23.9816	23.7012	22.1574	22.8629	23.1526	24.3443	24.4964	0.35468	-0.488987	0.00766077	0.0109882	0.819791	-1.09057
Rv0940c	Possible oxidoreductase	Function unknown; probably involved in cellular metabolism.	P9WKP1	Rv0940c	Mb0965c	intermediary metabolism and respiration	31.788	21	91.7	0	242.57	28.3342	28.349	28.4817	26.8995	25.1741	28.1736	27.7749	27.6968	28.27	22.935	28.7036	28.5632	0.363364	1.65437	0.00237424	0.0151876	0.24426	1.18
opcA	Putative OXPP cycle protein OpcA	May be involved in the functional assembly of glucose 6-phosphate dehydrogenase	O06813	Rv1446c	Mb1481c	intermediary metabolism and respiration	32.658	18	70.6	0	292.28	27.6693	24.355	27.4092	28.0085	23.2033	27.9064	27.763	26.1541	25.4089	23.4694	25.9785	27.6041	0.189112	0.793826	0.126886	0.688774	0.211679	0.758025
bacA	Probable drug-transport transmembrane ATP-binding protein ABC transporter BacA	Thought to be involved in active transport of drugs across the membrane (export): multidrugs resistance by an export mechanism. Responsible for energy coupling to the transport system and for the translocation of the substrate across the membrane.	P9WQI9	Rv1819c	Mb1850c	cell wall and cell processes	71.302	41	62	0	210.9	23.9762	24.3481	24.5272	23.463	24.2106	24.1226	23.1105	25.0453	24.8583	25.0639	23.6445	23.8062	0.0833105	0.112315	0.179638	-0.239466	0.0768701	0.166489
Rv1825	Conserved protein	Function unknown	P9WFG3	Rv1825	Mb1856	conserved hypotheticals	30.645	19	72.6	0	289.26	24.3351	23.9262	23.3025	23.807	24.0777	23.9983	24.299	23.9837	24.9509	24.7019	24.0216	24.2317	0.570799	-0.463794	0.758766	-0.357374	0.0951849	0.0928396
sucD	Probable succinyl-CoA synthetase (alpha chain) SucD (SCS-alpha)	Involved in tricarboxylic acid cycle [catalytic activity: ATP + succinate + CoA = ADP + succinyl-CoA + phosphate].	P9WGC7	Rv0952	Mb0977	intermediary metabolism and respiration	31.201	19	75.9	0	323.31	31.861	32.0122	32.0247	32.0437	31.516	31.9199	32.0698	32.314	32.0265	31.6058	32.0533	31.9953	0.209571	0.0811577	0.0982976	-0.0582663	0.688416	0.251948
Rv1458c	Probable unidentified antibiotic-transport ATP-binding protein ABC transporter	Thought to be involved in active transport of antibiotic across the membrane (export): unidentified antibiotic resistance by an export mechanism. Responsible for energy coupling to the transport system.	O53149	Rv1458c	Mb1493c	cell wall and cell processes	33.758	9	27.2	0	91.671	25.3026	24.4518	24.3988	25.1211	24.5696	25.8089	25.1747	25.3457	25.5282	25.7652	25.8312	25.5348	1.49956	-0.992661	0.66734	-0.543863	1.24623	-0.3609
Rv0958	Possible magnesium chelatase	Chelation, introducing a magnesium ion into specific substrate.	P71552	Rv0958	Mb0983	intermediary metabolism and respiration	49.581	13	44.2	0	170.93	23.9553	23.9227	24.1806	24.0876	23.3664	23.9952	23.5584	24.0287	23.4836	23.5826	23.4944	24.0614	0.723848	0.306707	0.132847	0.103559	0.031058	-0.022604
guaB1	Probable inosine-5'-monophosphate dehydrogenase GuaB1(imp dehydrogenase) (IMPDH) (IMPD)	Involved in GMP biosynthesis [catalytic activity: inosine 5'-phosphate + NAD+ + H2O = xanthosine 5'-phosphate + NADH]	P9WKI3	Rv1843c	Mb1874c	intermediary metabolism and respiration	49.964	31	78.3	0	323.31	30.1296	29.7145	29.8084	30.1391	29.6825	29.6724	29.8429	29.1857	30.028	30.2706	29.8029	30.0101	0.318819	-0.143703	0.406999	-0.196573	0.520041	-0.342394
sufC	Probable conserved ATP-binding protein ABC transporter	Thought to be involved in active transport across the membrane. Responsible for energy coupling to the transport system.	O53154	Rv1463	Mb1498	cell wall and cell processes	28.822	19	86.8	0	323.31	28.6481	27.8505	28.0583	28.4099	28.353	28.7151	28.5445	28.0352	28.0162	28.1769	28.1314	28.4257	0.0814971	-0.0590045	0.789742	0.247976	0.0831861	-0.0460135
Rv0968	Conserved protein	Function unknown	P9WKL9	Rv0968	Mb0993	conserved hypotheticals	10.264	7	74.5	0	139.42	22.6024	23.7034	24.0171	24.4265	24.71	24.2522	23.5918	22.8231	23.9296	22.994	22.4342	23.8844	0.217772	0.336773	1.42768	1.35874	0.255898	0.343976
Rv1864c	Conserved protein	Function unknown	P95151	Rv1864c	Mb1895c	conserved hypotheticals	27.24	9	54.6	0	44.158	25.4944	25.3079	25.3436	26.6153	24.3859	25.7287	25.611	25.8912	25.7179	24.9908	22.8392	25.2358	0.602238	1.02669	0.539231	1.22139	0.839237	1.38478
accA2	Probable acetyl-/propionyl-coenzyme A carboxylase alpha chain (alpha subunit) AccA2: biotin carboxylase + biotin carboxyl carrier protein (BCCP)	This protein carries two functions: biotin carboxyl carrier protein and biotin carboxyltransferase. Involved in the first step of long-chain fatty acid synthesis [catalytic activity: ATP + biotin-carboxyl-carrier protein + CO(2) = ADP + phosphate + carboxybiotin-carboxyl-carrier protein].	P71538	Rv0973c	Mb0998c	lipid metabolism	70.744	21	46.3	0	73.51	26.8413	26.8465	26.718	26.9567	23.191	26.8149	26.8784	26.8969	27.0568	26.9317	27.2297	26.8282	0.695528	-0.194565	0.469432	-1.3423	0.146714	-0.0524756
Rv1869c	Probable reductase	Function unknown; probably involved in cellular metabolism	P95146	Rv1869c	Mb1900c	intermediary metabolism and respiration	43.639	34	82	0	323.31	31.7342	31.749	31.8218	31.8193	32.4382	31.6913	31.7738	31.8038	32.0084	32.4524	31.6252	31.7628	0.278912	-0.17848	0.0354985	0.0361322	0.115694	-0.0847867
Rv1874	Unknown protein	Unknown	O07755	Rv1874	Mb1905	conserved hypotheticals	24.931	6	42.1	0	20.122	23.7612	24.7678	23.5905	24.1832	24.8805	23.8262	24.8438	24.6987	23.9866	24.1665	23.8591	23.5121	0.178357	0.193923	0.549909	0.450726	0.954807	0.663785
fabG1	3-oxoacyl-[acyl-carrier protein] reductase FabG1 (3-ketoacyl-acyl carrier protein reductase) (mycolic acid biosynthesis a protein)	Involved in the fatty acid biosynthesis pathway (first reduction step) (mycolic acid biosynthesis); reduces KASA/KASB products [catalytic activity: (3R)-3-hydroxyacyl-[acyl-carrier protein] + NADP+ = 3-oxoacyl-[acyl-carrier protein] + NADPH].	P9WGT3	Rv1483	Mb1519	lipid metabolism	25.697	12	70.9	0	323.31	28.8963	28.1203	28.2595	28.5184	27.2886	28.7094	28.7025	28.1727	28.4153	27.7703	28.5084	28.7534	0.0752091	0.0813249	0.117019	-0.171885	0.0922843	0.0861212
glnA3	Probable glutamine synthetase GlnA3 (glutamine synthase) (GS-I)	Involved in glutamine biosynthesis [catalytic activity: ATP + L-glutamate + NH(3) = ADP + glutamine + orthophosphate].	O07752	Rv1878	Mb1910	intermediary metabolism and respiration	46.72	8	31.6	0	88.77	26.2499	23.307	24.4356	24.2117	25.8069	25.5394	24.0794	26.5242	23.5608	26.7851	26.874	25.9198	0.958399	-1.8621	1.08722	-1.34027	0.872235	-1.8048
Rv0991c	Conserved serine rich protein	Function unknown	O05574	Rv0991c	Mb1018c	conserved hypotheticals	11.458	5	40.9	0	4.9626	25.8884	25.7488	25.7554	26.4856	27.1082	25.6591	23.8857	24.3016	25.7156	26.8429	25.1848	25.6817	0.0752215	-0.105617	0.327457	0.514485	0.791268	-1.26883
Rv1489	Conserved protein	Function unknown	L7N692	Rv1489	Mb1525	conserved hypotheticals	12.306	8	74.6	0	128.57	23.6647	23.9446	24.0238	23.8269	24.7342	23.1939	23.8631	24.3334	24.6931	24.7122	23.5058	24.7604	0.455297	-0.448392	0.268918	-0.407799	0.0207386	-0.0295919
Rv1883c	Conserved hypothetical protein	Function unknown	O07748	Rv1883c	Mb1915c	conserved hypotheticals	17.281	6	42.5	0	18.234	22.7758	22.4503	24.0641	25.2565	23.955	24.444	24.1471	22.9924	23.2167	24.0332	25.8025	23.3731	0.676682	-1.30622	0.0632263	0.148891	0.517252	-0.950867
mutB	Probable methylmalonyl-CoA mutase large subunit MutB (MCM)	Involved in propionic acid fermentation. Catalyzes the isomerization of succinyl-CoA to methylmalonyl-CoA during synthesis of propionate from tricarboxylic acid-cycle intermediates [catalytic activity : (R)-2-methyl-3-oxopropanoyl-CoA = succinyl- CoA.]	P9WJK5	Rv1493	Mb1530	lipid metabolism	80.603	25	54.7	0	323.31	29.2379	28.9161	28.8717	28.7389	25.2774	29.3673	29.2073	28.7322	29.1075	27.7572	29.3378	29.0028	0.247502	0.3093	0.26588	-0.904701	0.249607	0.316388
Rv1893	Conserved hypothetical protein	Function unknown	O07739	Rv1893	Mb1926	conserved hypotheticals	7.4671	2	34.7	0	7.8651	23.3143	24.8826	23.5305	24.2878	24.4348	22.7423	24.1472	23.937	22.5972	24.9831	24.2569	24.2972	0.481605	-0.603267	0.512977	-0.690805	0.816807	-0.95196
Rv0999	Unknown protein	Unknown	O05582	Rv0999	Mb1026	conserved hypotheticals	25.969	13	69.8	0	54.936	24.3122	24.8839	23.9077	25.4653	23.9836	23.7309	23.3772	24.6891	24.0268	23.741	22.8467	23.9997	0.867922	0.838787	0.600807	0.864113	0.414379	0.501887
lppD	Possible lipoprotein LppD	Unknown	P9WK29	Rv1899c	Mb1934c	cell wall and cell processes	36.405	8	29.6	0	114.71	25.8548	25.7797	25.6946	24.1947	25.901	26.195	25.9445	26.0403	26.1147	25.2964	26.5935	25.404	0.00921704	0.0117098	0.168459	-0.334434	0.254909	0.268527
aao	Probable D-amino acid oxidase Aao	Wide specificity for D-amino acids. Also acts on glycine [catalytic activity: a D-amino acid + H2O + O2 = a 2-oxo acid + NH3 + H2O2]	P9WP27	Rv1905c	Mb1940c	intermediary metabolism and respiration	34.112	15	70	0	89.516	25.947	25.8336	26.1238	26.2008	26.7468	26.4129	26.2743	25.5489	26.0342	26.3657	26.1599	26.3636	1.40858	-0.328287	0.381743	0.157057	0.700128	-0.343938
Rv1502	Hypothetical protein	Unknown	P9WLW7	Rv1502	Mb1540,Mb1541	unknown	33.472	7	39.5	0	16.951	23.2479	22.939	25.1826	23.0538	23.9914	23.7084	25.3138	25.5367	24.1057	23.8465	23.9236	24.4927	0.152035	-0.297754	0.661708	-0.503021	0.853115	0.897832
lppC	Probable lipoprotein LppC	Unknown	P9WFN3	Rv1911c	Mb1946c	cell wall and cell processes	19.798	3	29.4	0	49.209	23.4085	24.4154	23.2219	23.9393	24.0208	23.9225	23.7562	24.933	24.4103	24.1829	23.5865	23.4324	0.0406151	-0.0520109	0.418725	0.226912	0.70354	0.632575
Rv1019	Probable transcriptional regulatory protein (probably TetR-family)	Involved in transcriptional mechanism.	P96381	Rv1019	Mb1047	regulatory proteins	21.701	4	29.9	0	31.54	23.2532	23.8978	23.7665	22.9124	23.7484	23.652	23.9724	22.674	23.7789	23.4177	23.9254	22.9445	0.239972	0.209962	0.00716818	0.00845273	0.03135	0.0459283
Rv1025	Conserved protein	Function unknown	P96375	Rv1025	Mb1053	conserved hypotheticals	16.625	5	52.3	0	26.292	23.8381	23.6929	23.7502	25.2011	24.5551	23.1216	24.0286	24.4043	23.6509	24.3794	22.7042	22.9816	0.319386	0.405325	0.511002	0.937555	0.526652	0.672862
Rv1922	Probable conserved lipoprotein	Unknown	P95291	Rv1922	Mb1957	cell wall and cell processes	39.062	15	61.5	0	64.568	23.7612	23.0264	23.0398	23.657	23.9325	23.9375	22.9846	23.9028	24.8887	22.6505	23.3915	24.1025	0.0767883	-0.105702	0.4641	0.460861	0.322888	0.543865
kdpB	Probable potassium-transporting P-type ATPase B chain KdpB (potassium-translocating ATPase B chain) (ATP phosphohydrolase [potassium-transporting] B chain) (potassium binding and translocating subunit B)	One of the components of the high-affinity ATP-driven potassium transport (or KDP) system, which catalyzes the hydrolysis of ATP coupled with the exchange of hydrogen and potassium ions [catalytic activity:ATP + H(2)O + K(+)(out) = ADP + phosphate + K(+)(in)].	P9WPU3	Rv1030	Mb1059	cell wall and cell processes	74.633	14	31.3	0	13.213	22.7098	23.8593	23.4527	21.8197	24.4592	23.5939	23.3083	23.4089	23.7525	23.6028	23.9167	25.5158	0.668876	-1.0045	0.466905	-1.0542	0.634736	-0.855205
Rv1534	Probable transcriptional regulator	Possibly involved in a transcriptional mechanism	O08377	Rv1534	Mb1561	regulatory proteins	24.501	7	40	0	29.368	23.6487	23.0401	22.8902	23.3774	23.0021	24.834	23.961	24.2844	24.3712	23.145	23.4961	23.7183	0.382945	-0.260144	0.186464	0.284681	1.647	0.752416
tpx	Probable thiol peroxidase Tpx	Has antioxidant activity. Could remove peroxides or H(2)O(2)	P9WG35	Rv1932	Mb1967	virulence, detoxification, adaptation	16.896	9	91.5	0	237.81	31.5272	31.9607	31.6915	31.9216	32.7273	31.9133	31.769	31.8002	31.6504	32.1519	30.9025	31.5162	0.205119	0.202933	0.668363	0.663905	0.233679	0.216329
mazF5	Possible toxin MazF5	Function unknown	P95272	Rv1942c	Mb1977c	virulence, detoxification, adaptation	11.82	4	41.3	0	7.8504	23.7643	26.0163	26.0381	24.7352	26.0654	25.587	25.9873	23.9616	25.9944	23.7324	22.4439	23.5249	1.1235	2.03917	1.79143	2.2288	1.24369	2.08071
Rv1993c	Conserved protein	Function unknown	P9WLP5	Rv1993c	Mb2016c	conserved hypotheticals	9.3657	10	82.2	0	37.858	22.8915	25.0171	23.8622	24.5489	24.6661	24.2764	23.7105	22.9059	23.4698	23.4952	23.4234	22.2444	0.518434	0.869251	1.57311	1.44279	0.260692	0.307742
hisD	Probable histidinol dehydrogenase HisD (HDH)	Involved in histidine biosynthesis pathway (tenth step). This protein is considered as a bifunctional enzyme, possessing two active sites, one an alcohol dehydrogenase and the other an aldehyde dehydrogenase [catalytic activity: L-histidinol + 2 NAD(+) + H(2)O = L-histidine + 2 NADH].	P9WNW9	Rv1599	Mb1625	intermediary metabolism and respiration	45.378	14	40	0	209.25	28.9386	28.4306	28.329	28.6045	26.0094	28.636	28.3791	28.5891	28.6713	27.8631	28.5801	28.5462	0.323082	0.236263	0.255744	-0.579852	0.362801	0.216687
Rv1998c	Conserved protein	Function unknown	P9WLN9	Rv1998c	Mb2021c	conserved hypotheticals	27.322	9	48.1	0	37.438	27.1927	27.252	27.6884	27.333	26.5792	27.6163	28.2044	28.0729	27.7866	26.3657	27.1719	27.7309	0.271055	0.288227	0.059758	0.0867125	1.05505	0.931836
fadD14	Probable medium chain fatty-acid-CoA ligase FadD14 (fatty-acid-CoA synthetase) (fatty-acid-CoA synthase)	Involved in the fatty acid beta oxidation pathway (degradation).	O53406	Rv1058	Mb1087	lipid metabolism	59.624	24	45.5	0	160.66	28.3263	28.0853	27.9009	28.3917	24.8256	28.1255	28.1778	27.9864	28.2086	26.0182	27.3735	28.2833	0.586022	0.879171	0.0281303	-0.11074	0.609493	0.899265
Rv2003c	Conserved hypothetical protein	Unknown	P9WJZ5	Rv2003c	Mb2026c	conserved hypotheticals	31.049	6	36.8	0	24.488	23.7521	25.2499	23.7633	24.806	23.6686	24.4627	24.6596	24.9461	22.9806	25.3449	25.4089	24.9402	0.876489	-0.976235	1.17603	-0.918945	0.755389	-1.0359
trpE	Anthranilate synthase component I TrpE (glutamine amidotransferase)	Involved in tryptophan biosynthesis pathway (at the first step). Supposed tetramer of two components I and two components II: component I (Rv1609|trpE) catalyzes the formation of anthranilate using ammonia rather than glutamine, whereas component II (Rv0013|trpG) provides glutamine amidotransferase activity [catalytic activity: chorismate + L-glutamine = anthranilate + pyruvate + L-glutamate].	P9WFX3	Rv1609	Mb1635	intermediary metabolism and respiration	55.848	26	56.4	0	268.66	28.7771	28.8167	28.8995	28.6484	27.2793	28.8567	28.765	28.4497	28.8949	28.765	28.8127	28.9492	0.0588579	-0.0112108	0.51132	-0.580864	0.412894	-0.139116
pyk	Probable pyruvate kinase PykA	Produces phosphoenol pyruvate in glycolysis [catalytic activity: ATP + pyruvate = ADP + phosphoenolpyruvate]	P9WKE5	Rv1617	Mb1643	intermediary metabolism and respiration	50.699	41	88.1	0	323.31	31.8227	31.7792	31.7881	31.656	29.5326	31.7004	31.7778	31.6572	31.8112	30.339	31.6816	31.5917	0.61362	0.592573	0.103782	-0.241113	0.553519	0.544612
pra	Probable proline-rich antigen homolog Pra	Unknown	P9WIM7	Rv1078	Mb1107	conserved hypotheticals	25.064	7	26.2	0	323.31	24.1476	26.8898	26.3608	25.4815	27.2127	27.4232	25.7116	26.9116	25.9324	27.5562	24.8208	27.3865	0.257012	-0.788424	0.0371118	0.117982	0.157348	-0.402618
vapB45	Conserved protein	Unknown	O53464	Rv2018	Mb2041	conserved hypotheticals	25.976	15	83.7	0	168.31	25.664	25.6155	25.405	25.7928	25.7459	25.8172	25.3917	25.8495	25.6516	26.2365	25.5136	26.0198	0.724816	-0.361804	0.254743	-0.138014	0.508226	-0.292376
glyA1	Serine hydroxymethyltransferase 1 GlyA1	Interconversion of serine and glycine. Key enzyme in the biosynthesis of purines, lipids, hormones and other components [catalytic activity: 5,10-methylenetetrahydrofolate + glycine + H(2)O = tetrahydrofolate + L-serine.]	O53464	Rv1093	Mb1123	Intermediary metabolism and respiration	45.001	2	3.8	0	160.75	27.9608	28.2471	28.1451	27.9531	28.3923	28.1201	28.0885	27.2998	28.1181	28.3918	27.6941	28.142	0.0658616	0.0416985	0.119847	0.0791938	0.288463	-0.240497
fumC	Probable fumarase Fum (fumarate hydratase)	Involved in the tricarboxylic acid cycle. Catalyzes the reversible hydration of fumarate to L-malate [catalytic activity: (S)-malate = fumarate + H2O]	P9WN93	Rv1098c	Mb1128c	intermediary metabolism and respiration	50.14	29	57.4	0	323.31	31.9444	31.997	31.9891	31.8293	29.8605	31.7614	31.8887	31.8571	31.9954	30.0017	31.7825	31.785	0.591873	0.787106	0.0148646	-0.0393645	0.536254	0.724014
hspX	Heat shock protein HspX (alpha-crystallin homolog) (14 kDa antigen) (HSP16.3)	Stress protein induced by anoxia. Has a proposed role in maintenance of long-term viability during latent, asymptomatic infections, and a proposed role in replication during initial infection. Regulated by the two component regulatory system DEVR|Rv3133c/DEVS|Rv3132c, in response to a hypoxic signal.	P9WMK1	Rv2031c	Mb2057c	virulence, detoxification, adaptation	16.227	24	93.8	0	323.31	32.0414	32.2278	32.1251	31.4895	31.3925	32.5319	32.8407	33.081	33.2979	32.1555	32.546	32.8545	0.86019	-0.387236	0.790382	-0.714047	1.07925	0.554526
Rv2041c	Probable sugar-binding lipoprotein	Thought to be involved in active transport of sugar across the membrane (import).	O53485	Rv2041c	Mb2067c	cell wall and cell processes	47.876	18	55.6	0	150.68	23.383	25.1825	24.2163	24.1241	24.5864	24.464	23.4605	23.2435	23.8923	23.3575	25.0573	23.0963	0.202968	0.423568	0.367998	0.554513	0.18022	-0.30495
lppI	Probable lipoprotein LppI	Unknown	O53489	Rv2046	Mb2072	cell wall and cell processes	22.202	4	28.4	0	28.095	23.4766	25.1655	24.8231	24.1989	24.5131	23.9559	23.8581	23.3434	23.6847	24.6225	23.7474	22.9436	0.433992	0.717206	0.369743	0.451444	0.100726	-0.142448
ppm1	Polyprenol-monophosphomannose synthase Ppm1	Transfers mannose from GDP-mannose to all endogenous polyprenol-phosphates.	O53493	Rv2051c	Mb2077c	cell wall and cell processes	93.823	21	41.6	0	247.57	25.1771	23.1975	23.7158	24.857	25.0615	24.6285	24.5337	24.0425	24.6681	24.0339	23.3016	25.4567	0.0965698	-0.233944	0.381177	0.584905	0.0805515	0.150735
Rv1632c	Hypothetical protein	Unknown	O06149	Rv1632c	Mb1658c	conserved hypotheticals	16.63	7	68	0	55.669	25.0413	24.6305	23.4775	25.1002	24.1566	24.6762	25.0889	24.621	25.0259	23.8032	24.6288	24.691	0.00523575	0.00876617	0.273943	0.27	0.769989	0.537603
Rv1637c	Conserved protein	Function unknown	O06154	Rv1637c	Mb1663c	conserved hypotheticals	27.936	7	43.6	0	79.482	28.8815	28.7033	28.6584	28.7833	29.2006	28.7779	28.7462	28.7484	28.6302	29.1936	28.3376	28.723	0.00464113	-0.00363859	0.233723	0.169219	0.0596114	-0.0431143
pheT	Probable phenylalanyl-tRNA synthetase, beta chain PheT	Charging PHE-tRNA [catalytic activity: ATP + L-phenylalanine + tRNA(PHE) = AMP + diphosphate + L-phenylalanyl-tRNA(PHE)]	P9WFU1	Rv1650	Mb1677	information pathways	88.401	42	69	0	249.31	28.6651	28.1659	28.1818	28.4034	23.5378	28.9905	28.7038	28.102	28.5116	24.1483	28.8316	28.9575	0.256142	1.02513	0.0490695	-0.335209	0.285435	1.1267
Rv1152	Probable transcriptional regulatory protein	Involved in transcriptional mechanism	O06550	Rv1152	Mb1183	regulatory proteins	13.114	10	79.3	0	44.939	22.6442	23.3185	24.8351	24.0133	24.4563	23.6069	24.4377	23.446	23.1701	24.3288	24.2192	24.3734	0.472373	-0.707883	0.492002	-0.281635	0.736348	-0.622555
dsbF	Probable conserved lipoprotein DsbF	Unknown; possibly involved in thiol:disulfide interchange.	I6XYM2	Rv1677	Mb1704	cell wall and cell processes	19.238	6	38.5	0	83.508	24.0444	23.7308	24.3544	23.9717	25.4851	23.0724	24.3046	23.5325	23.9582	25.0878	23.9574	24.0483	0.326236	-0.321296	0.0841121	-0.188082	0.435321	-0.432716
pepE	Dipeptidase PepE	Hydrolysis of peptide bonds	P9WHS7	Rv2089c	Mb2116c	intermediary metabolism and respiration	39.439	12	49.6	0	120.66	26.1874	25.883	25.8433	25.9644	25.838	25.9873	25.7993	26.117	25.7101	26.263	25.8701	25.9096	0.0925881	-0.0429802	0.250923	-0.0843347	0.324422	-0.13873
pafC	Proteasome accessory factor C PafC	Unknown	P9WIL9	Rv2095c	Mb2122c	intermediary metabolism and respiration	33.764	13	58.9	0	97.319	26.8666	26.6645	27.0128	26.5875	24.7021	27.0168	27.0514	26.6068	27.1008	25.4208	26.6074	27.0829	0.400786	0.477554	0.112296	-0.268264	0.456898	0.549295
Rv1178	Probable aminotransferase	Function unknown; probably involved in cellular metabolism.	O50434	Rv1178	Mb1211	intermediary metabolism and respiration	37.762	19	59.4	0	205.91	28.9257	29.1533	29.3192	28.9342	28.6072	29.3427	29.161	29.2202	29.4547	28.3135	28.8415	29.2225	0.520422	0.340228	0.190898	0.168834	0.807678	0.486113
Rv1693	Conserved hypothetical protein	Unknown	O33195	Rv1693	Mb1719	conserved hypotheticals	6.0947	4	98.3	0	31.974	25.209	23.3089	24.0052	25.2968	23.1849	23.3676	25.1507	24.6808	23.8865	24.4471	23.2109	22.5981	0.413588	0.755676	0.241538	0.531055	0.812733	1.15394
mctB	Outer membrane protein MctB	Outer membrane channel	P9WJ83	Rv1698	Mb1724	cell wall and cell processes	32.391	14	69.7	0	255.6	21.4531	23.1563	23.874	23.0129	24.7447	24.5981	24.4564	23.7896	24.9606	23.7542	24.4143	24.6626	0.879517	-1.44923	0.091484	-0.158438	0.103802	0.125175
dop	Deamidase of pup Dop	Deamidates the C-terminal glutamine of pup	P9WNU9	Rv2112c	Mb2136c	intermediary metabolism and respiration	58.315	30	62.8	0	323.31	28.9926	28.433	28.386	28.3253	24.2512	29.0513	28.4258	28.0248	28.8945	23.8297	28.5261	28.3816	0.471514	1.69136	0.0473366	0.296776	0.418825	1.53589
trmI	RNA methyltransferase	Involved in transfer of methyl group (from S-adenosyl-L-methionine to the substrate).	P9WFZ1	Rv2118c	Mb2142c	intermediary metabolism and respiration	30.122	9	48.6	0	42.396	25.2694	25.5402	25.4272	23.5486	26.1249	25.6653	25.8691	25.4493	25.2797	26.7853	26.2175	25.8088	1.3645	-0.858245	0.617368	-1.15758	1.04092	-0.737834
dapD	Tetrahydrodipicolinate N-succinyltransferase DapD	Involved in biosynthesis of diaminopimelate and lysine from aspartate semialdehyde (at the third step) [catalytic activity: tetrahydrodipicolinate + succinyl-CoA + H2O = N-succinyl-2-amino-6-ketopimelate + coenzyme A]	P9WP21	Rv1201c	Mb1233c	intermediary metabolism and respiration	32.642	27	89	0	323.31	30.7761	30.9225	31.0379	30.9183	31.2169	30.9073	30.9179	30.9845	31.1391	31.1609	30.8658	30.9292	0.246296	-0.0731233	0.0748295	0.0288391	0.0915858	0.028546
cysQ	Monophosphatase CysQ	Can dephosphorylate a broad range of substrates. Likely involved in sulfur metabolism, controlling the pool of 3'-phosphoadenosine 5'-phosphate (pap) and 3'-phosphoadenoside 5'-phosphosulfate (PAPS) [catalytic activity: adenosine 3',5'-bisphosphate + H2O = adenosine 5'-phosphate + phosphate]. Has also been shown to have myo-inositol 1-phosphatase [catalytic activity: myo-inositol 1-phosphate + H(…	P9WKJ1	Rv2131c	Mb2155c	intermediary metabolism and respiration	28.447	7	37.1	0	44.051	24.5998	23.5203	23.3687	22.3951	23.922	25.7908	26.0035	23.6023	23.0718	25.0519	24.4545	23.5248	0.364094	-0.514115	0.102705	-0.307758	0.0398554	-0.117884
fadD6	Probable fatty-acid-CoA ligase FadD6 (fatty-acid-CoA synthetase) (fatty-acid-CoA synthase)	Function unknown, but supposed involvement in lipid degradation.	O05307	Rv1206	Mb1238	lipid metabolism	64.336	17	35.5	0	57.955	23.9474	23.2418	24.5728	24.5708	24.1756	24.7059	24.5872	23.8919	24.5927	23.2787	24.4039	24.9727	0.180114	-0.297813	0.195236	0.265666	0.0899471	0.138859
Rv1217c	Probable tetronasin-transport integral membrane protein ABC transporter	Thought to be involved in active transport of tetronasin across the membrane (export): tetronasin resistance by an export mechanism. Responsible for the translocation of the substrate across the membrane.	O05318	Rv1217c	Mb1249c	cell wall and cell processes	56.65	6	15.7	0	15.852	24.1794	23.7273	24.0541	25.767	23.5148	23.1194	23.6635	23.4359	24.7205	24.1858	22.8334	23.1582	0.622784	0.594479	0.332114	0.741312	0.409206	0.547504
htrA	Probable serine protease HtrA (DEGP protein)	Possibly hydrolyzes peptides and/or proteins (seems to cleave preferentially after serine residue).	O06291	Rv1223	Mb1255	intermediary metabolism and respiration	54.182	33	73.3	0	323.31	26.532	27.4595	27.3388	26.2128	28.5944	27.5061	26.2534	26.862	26.7505	28.7004	27.2591	27.7442	0.702257	-0.79115	0.223992	-0.463437	1.29533	-1.27929
Rv1732c	Conserved protein	Function unknown	P71990	Rv1732c	Mb1761c	conserved hypotheticals	19.399	8	62.6	0	209.53	28.5679	28.4731	28.3201	28.3516	28.7734	28.4308	28.1928	28.4775	28.3029	28.0484	27.7146	28.1182	1.57488	0.493305	1.44403	0.558179	1.14415	0.364
yfiH	Conserved protein YfiH	Unknown	P9WKD5	Rv2149c	Mb2173c	conserved hypotheticals	25.964	8	52.8	0	61.129	26.037	26.06	26.1234	25.9239	25.9603	26.1594	26.5176	26.2135	26.219	26.3961	26.0405	26.6413	0.743951	-0.285819	0.846368	-0.344738	0.0742365	-0.042558
mrp	Probable Mrp-related protein Mrp	Unknown: thought to be a ATP-binding protein.	P9WJN7	Rv1229c	Mb1261c	intermediary metabolism and respiration	40.084	6	23.4	0	4.5373	23.2139	23.4265	24.0843	23.27	23.9568	23.5347	22.0782	23.7692	22.6995	25.0186	24.553	22.5122	0.216757	-0.453061	0.215425	-0.440758	0.573779	-1.17898
murE	Probable UDP-N-acetylmuramoylalanyl-D-glutamate-2,6-diaminopimelate ligase MurE	Involved in cell wall formation; peptidoglycan biosynthesis.	P9WJL3	Rv2158c	Mb2182c	cell wall and cell processes	55.34	12	34.4	0	38.037	25.0199	22.7185	23.7711	24.8459	24.8655	23.7779	24.3081	22.9605	24.0682	23.6091	24.9528	24.2114	0.212144	-0.421256	0.17044	0.238659	0.349575	-0.478804
Rv1234	Probable transmembrane protein	Unknown	O50451	Rv1234	Mb1266	cell wall and cell processes	18.604	12	56	0	103.58	23.5161	25.0312	22.897	22.937	24.4093	23.6798	23.8119	23.77	23.9971	25.4205	24.1299	24.1266	0.412813	-0.744208	0.661493	-0.883607	0.734532	-0.69933
corA	Possible magnesium and cobalt transport transmembrane protein CorA	Thought to be involved in transport of magnesium and cobalt ions across the membrane. Responsible for the translocation of the substrate across the membrane.	O50455	Rv1239c	Mb1271c	cell wall and cell processes	41.5	13	37.7	0	221.19	24.504	24.0167	23.7998	23.4069	23.7524	23.7666	23.3997	23.8421	24.7924	24.208	23.0916	25.0186	0.00043304	0.000792185	0.335493	-0.464084	0.046705	-0.0946363
Rv1748	Unknown protein	Unknown	P72005	Rv1748	Mb1777	conserved hypotheticals	27.084	13	57.2	0	91.556	23.3114	23.9418	24.2606	24.1558	24.3619	23.0033	24.2702	23.6426	23.8479	23.1024	24.0979	24.7707	0.0976184	-0.152377	0.0824752	-0.149975	0.0462251	-0.0700823
Rv1245c	Probable short-chain type dehydrogenase/reductase	Function unknown; supposedly involved in cellular metabolism.	O50460	Rv1245c	Mb1277c	intermediary metabolism and respiration	29.215	19	75	0	242.57	27.9546	28.0984	28.1362	27.8516	27.3109	28.4322	28.4161	28.0207	28.2902	28.373	27.7351	28.4657	0.21035	-0.128213	0.339974	-0.326393	0.0692994	0.0510635
Rv2172c	Conserved protein	Unknown	O53506	Rv2172c	Mb2194c	conserved hypotheticals	33.039	14	60.8	0	323.31	29.4641	29.2677	29.4459	29.541	28.8349	29.7435	29.7156	29.482	29.621	29.6295	29.6903	29.616	1.71463	-0.252707	0.419716	-0.272151	0.211402	-0.0390345
mmpL14	PROBABLE CONSERVED TRANSMEMBRANE TRANSPORT PROTEIN MMPL14	Unknown	A0A0H3M5L6		Mb1787	cell wall and cell processes	99.477	22	33.5	0	203.69	25.1345	23.9117	23.4526	24.6446	24.6206	25.7944	23.9408	23.785	23.3811	23.9977	23.6771	23.5037	0.349761	0.440104	1.45305	1.29368	0.0366148	-0.0238609
Rv1761c	Possible exported protein	Unknown	O06796	Rv1761c	Mb1792c	cell wall and cell processes	13.487	5	63.8	0	52.828	23.0836	23.3417	24.9999	22.8347	24.2421	24.5252	24.5784	23.3276	24.2107	22.9854	24.8427	23.7123	0.0157494	-0.0383752	0.00899287	0.0205472	0.105661	0.192118
Rv1262c	Hypothetical hit-like protein	Unknown	P9WML1	Rv1262c	Mb1293c	conserved hypotheticals	15.74	7	62.5	0	53.943	25.6288	26.1913	25.9442	26.267	25.6805	25.7219	26.081	25.2818	26.0093	26.2651	25.649	25.9402	0.0424213	-0.0300198	0.0840936	-0.061636	0.198804	-0.160743
Rv1774	Probable oxidoreductase	Function unknown; probably involved in cellular metabolism	O33177	Rv1774	Mb1803	intermediary metabolism and respiration	48.34	29	72	0	323.31	32.012	32.1139	32.2313	32.1663	32.5963	32.2182	32.222	32.275	32.4017	32.6408	32.0266	32.1655	0.332685	-0.158576	0.0752834	0.0492973	0.0384172	0.0218964
Rv2197c	Probable conserved transmembrane protein	Unknown	P9WLI9	Rv2197c	Mb2220c	cell wall and cell processes	22.48	5	26.6	0	77.134	22.7681	23.0867	23.764	23.7541	23.5023	24.342	23.7452	24.3098	25.0118	24.5291	25.1382	23.6467	1.10721	-1.23177	0.500369	-0.571894	0.0498981	-0.0824394
eccD5	ESX conserved component EccD5. ESX-5 type VII secretion system protein. Probable membrane protein.	Unknown	P9WNP9	Rv1795	Mb1823	cell wall and cell processes	53.435	15	24.7	0	148.2	23.9955	24.5668	23.0968	23.3622	24.4451	24.8545	25.3641	23.8626	22.5751	24.1819	25.606	24.793	0.75304	-0.973951	0.454294	-0.639695	0.438843	-0.926347
lysA	Diaminopimelate decarboxylase LysA (DAP decarboxylase)	Involved in biosynthesis of lysine (last step) [catalytic activity: MESO-2,6-diaminoheptanedioate = L-lysine + CO(2)].	P9WIU7	Rv1293	Mb1325	intermediary metabolism and respiration	47.457	27	78.3	0	293.41	28.915	29.2535	28.8231	28.7818	26.7664	28.5959	28.8404	28.7611	28.6551	27.3346	28.3236	29.2848	0.518741	0.682876	0.112986	-0.266301	0.316966	0.437892
Rv1312	Conserved hypothetical secreted protein	Unknown	P9WM29	Rv1312	Mb1344	cell wall and cell processes	16.13	6	38.2	0	8.4932	24.843	23.3339	24.2225	23.9307	24.0843	22.002	23.7775	25.2212	23.8663	24.3365	23.7487	23.4456	0.221395	0.28953	0.28265	-0.504575	0.34405	0.444735
adoK	Adenosine kinase	Adenosine phosphorylation	P9WID5	Rv2202c	Mb2225c	intermediary metabolism and respiration	34.472	22	96	0	323.31	32.9509	33.1085	33.0185	33.2311	33.3326	33.1614	32.8882	32.7961	32.9382	33.2378	32.2521	33.0161	0.250074	0.190606	0.601089	0.406335	0.0439759	0.03884
Rv1830	Conserved hypothetical protein	Function unknown	P9WME5	Rv1830	Mb1861	conserved hypotheticals	24.02	6	30.7	0	42.883	25.157	24.389	24.3917	23.382	23.5318	24.7858	24.8529	24.4456	24.646	23.8381	24.5873	24.7444	0.270572	0.255929	0.393716	-0.490067	0.354022	0.258214
Rv1836c	Conserved protein	Function unknown	P9WLQ9	Rv1836c	Mb1867c	conserved hypotheticals	69.604	25	58.8	0	323.31	25.9993	27.0271	26.3278	26.5865	26.7037	27.5587	25.4141	26.473	27.176	27.5466	26.599	27.4449	0.808177	-0.745472	0.225208	-0.247212	0.640449	-0.842485
Rv1332	Probable transcriptional regulatory protein	Involved in transcriptional mechanism.	P9WM25	Rv1332	Mb1367	regulatory proteins	24.054	7	54.1	0	68.492	24.2489	24.4842	25.0916	23.518	24.5845	23.9429	23.222	23.4684	24.7103	23.9964	22.977	23.3331	1.40096	1.17278	0.603112	0.579641	0.265388	0.364737
dlaT	DlaT, dihydrolipoamide acyltransferase, E2 component of pyruvate dehydrogenase	Involved in tricarboxylic acid cycle; converts pyruvate to acetyl-CoA and CO2. Also involved in antioxidant defense; LPDC|Rv0462, DLAT|Rv2215, AHPD|Rv2429, and AHPC|Rv2428 constitute an NADH-dependent peroxidase and peroxynitrite reductase that provides protection against oxidative stress.	P9WIS7	Rv2215	Mb2238	intermediary metabolism and respiration	57.073	38	72.3	0	323.31	32.1033	31.5797	31.4891	31.8636	31.3915	31.9668	31.7964	31.4772	31.6972	30.9918	32.1308	31.9388	0.0310158	0.0368945	0.0464144	0.0534655	0.0278472	-0.0302264
Rv1847	Conserved protein	Function unknown	P9WIM3	Rv1847	Mb1878	conserved hypotheticals	15.098	4	35.7	0	15.028	25.5025	25.4475	25.4252	25.6777	25.0537	25.5559	25.6101	25.0974	25.3452	25.1092	25.834	25.6384	0.114795	-0.0688197	0.124337	-0.0981197	0.268963	-0.176277
Rv2237	Conserved protein	Unknown	P9WLH1	Rv2237	Mb2261	conserved hypotheticals	29.067	12	54.5	0	92.17	23.5827	24.7271	24.8343	23.8171	23.956	23.1763	24.7589	25.003	23.4826	24.1194	23.7058	23.6663	0.575923	0.55092	0.256077	-0.180664	0.520468	0.584356
accD6	Acetyl/propionyl-CoA carboxylase (beta subunit) AccD6	Involved in fatty acid biosynthesis (mycolic acids synthesis) [catalytic activity: ATP + propionyl-CoA + CO(2) + H(2)O = ADP + orthophosphate + methylmalonyl-CoA].	P9WQH5	Rv2247	Mb2271	lipid metabolism	50.135	24	53.3	0	273.21	26.6418	25.8104	25.8955	25.9405	23.9332	27.0037	26.1682	25.7154	25.7651	25.5893	26.0398	26.239	0.186991	0.159868	0.131994	-0.330239	0.110397	-0.0731398
Rv2251	Possible flavoprotein	Electron acceptor	L0TBR2	Rv2251	Mb2275	intermediary metabolism and respiration	55.769	24	61.2	0	218.76	29.6076	29.8164	29.7888	29.7302	29.9232	29.6558	29.7113	29.7416	29.8315	30.2465	29.972	29.7594	0.753967	-0.255044	0.618454	-0.222893	0.727393	-0.23119
Rv1888c	Possible transmembrane protein	Unknown	O07744	Rv1888c	Mb1920c	cell wall and cell processes	27.442	11	45.2	0	36.639	22.1718	24.3098	23.6181	23.3517	24.7647	23.8526	23.3254	22.64	23.8581	25.1773	24.4268	23.1151	0.428048	-0.873117	0.12521	-0.250003	0.621599	-0.965199
carA	Probable carbamoyl-phosphate synthase small chain CarA (carbamoyl-phosphate synthetase glutamine chain)	Involved in both arginine and pyrimidine biosynthesis [catalytic activity: 2 ATP + L-glutamine + CO(2) + H(2)O = 2 ADP + phosphate + glutamate + carbamoyl phosphate]	P9WPK5	Rv1383	Mb1418	intermediary metabolism and respiration	39.766	7	27.9	0	16.676	24.8261	23.9644	24.1232	22.8374	24.1078	24.9721	24.8927	23.9019	23.8207	23.7473	24.7376	24.555	0.0353037	-0.0420837	0.209946	-0.374224	0.111536	-0.141561
Rv2272	Probable conserved transmembrane protein	Unknown	P9WLF5	Rv2272	Mb2295	cell wall and cell processes	12.994	3	18.9	0	94.921	22.3869	24.2338	24.2987	25.0216	24.5626	24.3715	24.2075	24.8844	24.9945	24.3206	23.6556	24.2558	0.264002	-0.437555	0.9381	0.574553	0.887384	0.618118
Rv2277c	Possible glycerolphosphodiesterase	Unknown	P9WLF1	Rv2277c	Mb2300c	intermediary metabolism and respiration	31.846	9	42.5	0	96.307	27.4217	27.4499	27.4488	27.5822	26.1904	27.0235	27.5044	27.6193	28.1042	27.3692	27.5471	28.0144	0.45543	-0.203468	0.727524	-0.711539	0.13755	0.0990715
aceAa	Probable isocitrate lyase AceAa [first part] (isocitrase) (isocitratase) (Icl)	Involved in glyoxylate bypass, an alternative to the tricarboxylic acid cycle [catalytic activity: isocitrate = succinate + glyoxylate].	O07718	Rv1915	Mb1950	Intermediary metabolism and respiration	85.319	69	87.7	0	323.31	33.0767	33.1654	33.0966	33.1302	33.4203	33.1104	33.1088	33.1349	33.2493	33.2133	33.2242	33.2174	1.75396	-0.10539	0.00644927	0.00196965	0.552907	-0.0539958
lipM	Probable esterase LipM	Hydrolysis of lipids (bound ester).	Q50681	Rv2284	Mb2305	intermediary metabolism and respiration	46.681	11	45.9	0	25.895	23.7734	25.2733	24.2087	24.1211	24.9806	23.9786	23.078	22.9484	23.8864	23.9993	25.4289	25.5601	0.359558	-0.57763	0.466535	-0.635967	1.36358	-1.69184
lppF	Probable conserved lipoprotein LppF	Unknown	O53963	Rv1921c	Mb1956c	cell wall and cell processes	44.995	22	79.9	0	252.88	23.6349	21.3523	23.0788	24.3222	24.2713	22.5639	24.0982	24.2741	24.3137	23.891	23.4047	23.2765	0.514414	-0.835377	0.116826	0.195083	1.62304	0.704582
mpt63	Immunogenic protein Mpt63 (antigen Mpt63/MPB63) (16 kDa immunoprotective extracellular protein)	Unknown	P9WIP1	Rv1926c	Mb1961c	cell wall and cell processes	16.514	5	57.2	0	44.053	26.1778	26.6377	26.5098	26.2165	28.2214	24.2257	26.7571	27.1981	26.8136	27.8303	26.374	26.7575	0.525131	-0.545473	0.245581	-0.766031	0.048197	-0.0643107
Rv2294	Probable aminotransferase	Unknown	P9WQ83	Rv2294	Mb2316	intermediary metabolism and respiration	44.283	26	82.6	0	234.22	28.5867	28.5408	28.6308	28.308	28.4965	29.0341	28.6739	28.5764	28.8236	28.998	28.5398	29.034	0.775241	-0.271152	0.381127	-0.244359	0.40274	-0.165944
Rv1419	Unknown protein	Unknown	P9WLX9	Rv1419	Mb1454	conserved hypotheticals	16.853	6	63.7	0	33.08	23.7405	24.2069	23.8269	22.9665	24.409	23.439	24.431	24.0238	24.1266	23.2312	22.8144	24.4363	0.35327	0.430783	0.0594947	0.110872	0.628372	0.699816
Rv2300c	Conserved protein	Function unknown	P9WLD7	Rv2300c	Mb2322c	conserved hypotheticals	34.352	4	12.6	0	7.3889	24.2456	24.7031	23.8259	24.0231	23.6447	24.5537	24.3498	25.224	24.6945	23.7003	22.991	23.8685	0.934307	0.738236	0.667018	0.553892	1.54025	1.23614
fadD12	Possible long-chain-fatty-acid--CoA ligase FadD12 (fatty-acid-CoA synthetase) (fatty-acid-CoA synthase)	Function unknown, but supposed involvement in lipid degradation.	O06831	Rv1427c	Mb1462c	lipid metabolism	58.063	11	30.3	0	52.87	24.5439	24.7711	24.158	24.2479	24.0046	24.4975	24.769	23.9494	24.2994	24.0278	25.2964	24.8416	0.218269	-0.230945	0.521887	-0.471945	0.362481	-0.382662
Rv2305	Unknown protein	Unknown	A0A0H3M5Z7	Rv2305	Mb2327	Conserved hypotheticals	46.181	1	4.2	0	25.378	24.7433	22.3205	24.6435	23.6325	24.2893	24.5813	23.9312	22.7968	22.892	25.3281	23.0244	24.0469	0.0785982	-0.230747	0.0158349	0.0345351	0.538748	-0.926517
Rv2315c	Conserved protein	Function unknown	P71897	Rv2315c	Mb2342c	conserved hypotheticals	54.577	28	74.9	0	278.83	29.3277	29.0119	29.1174	28.9215	29.2137	29.0955	28.9331	28.6667	28.995	29.7656	28.8555	29.2821	0.206248	-0.148743	0.334811	-0.224189	0.707183	-0.436153
lppP	Probable lipoprotein LppP	Unknown	P9WK69	Rv2330c	Mb2357c	cell wall and cell processes	18.844	5	40.6	0	28.12	24.8631	23.4933	24.3086	24.016	25.0916	23.0036	24.5737	23.7324	23.1133	24.0395	23.3531	24.1111	0.344506	0.387081	0.113083	0.202515	0.0191905	-0.0281054
Rv1461	Conserved protein	Function unknown	P9WFP7	Rv1461	Mb1496	conserved hypotheticals	94.17	21	34	0	57.143	26.4722	25.5083	26.7764	26.6919	22.8794	26.4557	26.498	26.8076	26.2576	24.5883	27.2226	26.8865	0.00714702	0.0198447	0.235596	-0.890108	0.125344	0.28861
cysK1	Cysteine synthase a CysK1 (O-acetylserine sulfhydrylase A) (O-acetylserine (thiol)-lyase A) (CSASE A)	Involved in cysteine biosynthesis [catalytic activity: O3-acetyl-L-serine + H(2)S = L-cysteine + acetate].	P9WP55	Rv2334	Mb2362	intermediary metabolism and respiration	32.752	21	87.1	0	323.31	30.4733	30.716	30.3807	30.56	31.2093	30.4925	30.5286	30.5064	30.6273	31.1083	30.5964	30.549	0.483079	-0.22787	0.00303928	0.00269953	0.466375	-0.197147
Rv1466	Conserved protein	Function unknown	O53157	Rv1466	Mb1501	conserved hypotheticals	12.384	6	47.8	0	146.69	28.6497	28.7216	28.306	29.0914	29.5118	28.4392	28.8461	28.7498	28.4363	28.7242	27.9664	28.736	0.105617	0.0835177	0.598437	0.538598	0.288038	0.201854
trxB1	Probable thioredoxin TrxB1	Thioredoxin participates in various redox reactions through the reversible oxidation of its active center dithiol, to a disulfide, & catalyzes dithiol-disulfide exchange reactions.	L7N664	Rv1471	Mb1506	intermediary metabolism and respiration	13.341	4	53.7	0	24.676	25.8369	25.8472	25.4356	25.3945	25.719	24.2456	23.6461	24.0065	24.5019	25.5325	24.0447	24.6497	0.999112	0.964308	0.239197	0.377419	0.623835	-0.690821
smtB	Probable transcriptional regulatory protein SmtB (probably ArsR-family)	Involved in transcriptional mechanism.	P9WMI5	Rv2358	Mb2379	regulatory proteins	14.421	4	51.9	0	29.014	24.3491	23.9127	24.395	24.4396	25.1862	24.1818	24.2493	24.5004	23.848	24.7593	24.3237	24.2722	0.461519	-0.232822	0.168116	0.150782	0.442854	-0.252505
acn	Probable iron-regulated aconitate hydratase Acn (citrate hydro-lyase) (aconitase)	Involved in tricarboxylic acid cycle [catalytic activity: citrate = cis-aconitate + H2O]	O53166	Rv1475c	Mb1511c	intermediary metabolism and respiration	102.45	63	82.2	0	323.31	33.8497	34.0135	33.9145	33.9423	33.8798	33.8261	33.845	33.9223	33.8662	33.715	33.9166	33.7624	0.761155	0.127886	0.538004	0.0847499	0.54179	0.0798416
fabG3	Possible 20-beta-hydroxysteroid dehydrogenase FabG3 (cortisone reductase) ((R)-20-hydroxysteroid dehydrogenase)	Not really known; thought to be involved in lipid biosynthesis [catalytic activity: androstan-3-alpha,17-beta-DIOL + NAD+ = 17-beta-hydroxyandrostan-3-one + NADH].	P9WGT1	Rv2002	Mb2025	lipid metabolism	27.029	7	33.1	0	73.511	26.5359	26.2632	26.133	26.3636	22.6705	26.5916	26.6611	26.528	26.5332	26.3996	26.5855	26.5597	0.705088	-0.204247	0.440713	-1.30638	0.336315	0.0591628
Rv1480	Conserved protein	Function unknown	P9WLX5	Rv1480	Mb1516	conserved hypotheticals	34.333	12	49.8	0	44.649	25.5502	25.4773	25.8439	25.7114	24.6921	25.8721	26.4446	26.162	26.0411	24.2916	25.5951	26.3091	0.138484	0.225201	0.0126064	0.0265846	0.608117	0.817279
Rv1487	Conserved membrane protein	Unknown	P71767	Rv1487	Mb1523	cell wall and cell processes	15.159	4	36.1	0	10.356	23.9613	24.0251	24.7406	23.3689	23.8224	24.6444	23.5236	23.7003	23.5976	24.677	23.516	22.6618	0.418538	0.624044	0.179333	0.32694	0.00621975	-0.0111148
fdxA	Ferredoxin FdxA	Involved in electron transfer.	P9WNE7	Rv2007c	Mb2030c	intermediary metabolism and respiration	12.064	4	81.6	0	34.711	29.6621	29.5077	30.1529	27.9037	28.67	29.3557	29.7228	29.8067	30.3258	30.0421	29.545	29.6683	0.030815	0.0224419	1.17089	-1.10863	0.344299	0.200006
Rv2387	Conserved protein	Function unknown	P71757	Rv2387	Mb2408	conserved hypotheticals	45.008	7	18.5	0	84.888	24.0445	23.0658	24.009	23.4688	22.664	24.2654	23.6795	23.6953	23.9779	23.9186	22.3744	24.6591	0.0250411	0.0557493	0.0797767	-0.184622	0.0686224	0.133565
cysA	Sulfate-transport ATP-binding protein ABC transporter CysA1	Involved in the active transport across the membrane of multiple sulfur-containing compounds, including sulfate and thiosulfate (import). Responsible for energy coupling to the transport system.	P9WQM1	Rv2397c	Mb2419c	cell wall and cell processes	37.443	12	65.8	0	90.128	23.7286	22.3353	23.564	23.8289	23.4131	24.0335	23.4532	23.1026	23.3154	23.037	24.03	24.0831	0.38407	-0.507403	0.0366808	0.0417945	0.528365	-0.426333
Rv2030c	Conserved protein	Unknown	P9WLM1	Rv2030c	Mb2055c,Mb2056c	conserved hypotheticals	74.929	40	65.1	0	323.31	28.7758	28.7509	28.4824	27.9958	27.4531	29.0274	29.2002	28.7539	29.7721	28.7357	29.1393	29.147	0.957155	-0.337619	0.81631	-0.848555	0.292935	0.234752
pks5	Probable polyketide synthase Pks5	Involved in polyketide metabolism.	O53901	Rv1527c	Mb1554c	lipid metabolism	223.86	75	53	0	323.31	30.1547	29.5475	29.61	29.6849	25.2098	29.903	29.9238	29.1421	29.5402	28.1082	30.0888	29.8785	0.248423	0.412256	0.26375	-1.09262	0.0946884	0.17686
Rv1543	Possible fatty acyl-CoA reductase	Thought to reduce acyl-CoA esters of fatty acids to fatty aldehydes.	P9WGS1	Rv1543	Mb1570	lipid metabolism	36.82	17	73.6	0	233.8	27.6216	27.0433	27.1713	27.7135	26.5097	28.3235	28.0053	27.4349	27.6853	27.5942	27.6578	28.0169	1.0225	-0.477522	0.165196	-0.240733	0.0798972	-0.0477975
rbpA	Conserved protein	Unknown	P9WHJ5	Rv2050	Mb2076	conserved hypotheticals	12.972	11	78.4	0	205.41	27.1985	27.1992	24.1382	26.3672	27.5799	26.1028	26.6309	23.3134	26.3454	26.727	23.1043	24.4068	0.41431	1.43259	0.774163	1.93721	0.1726	0.683865
rne	Possible ribonuclease E Rne	Thought to be involved in several cellular process.	P71905	Rv2444c	Mb2471c	information pathways	103.39	13	17.6	0	82.793	25.3082	23.6362	23.2121	22.6933	23.835	24.9495	24.9269	24.2805	24.6093	25.9205	25.8751	24.0792	0.63369	-1.23943	0.75723	-1.46567	0.468027	-0.685998
ilvA	Probable threonine dehydratase IlvA	Involved in isoleucine biosynthesis (first step). Catalyzes the formation of alpha-ketobutyrate from threonine in a two step reaction. The first step is a dehydration of threonine, followed by rehydration and liberation of ammonia [catalytic activity: L-threonine + H(2)O = 2-oxobutanoate + NH(3) + H(2)O].	P9WG95	Rv1559	Mb1585	intermediary metabolism and respiration	45.04	14	54.3	0	112.1	27.983	27.1633	27.0547	26.9846	24.9206	27.2124	27.4495	26.4942	27.3031	26.8976	27.8601	27.832	0.108595	-0.129558	0.659617	-1.15734	0.443048	-0.447605
blaC	Class a beta-lactamase BlaC	Hydrolyses beta-lactams to generate corresponding beta-amino acid [catalytic activity: a beta-lactam + H(2)O = a substituted beta-amino acid].	P9WKD3	Rv2068c	Mb2094c	intermediary metabolism and respiration	32.567	14	68.1	0	149.64	24.1775	23.4996	24.3193	23.3804	24.0987	24.564	24.8736	22.7958	24.6129	24.9504	24.4831	24.3351	0.877006	-0.590743	0.666972	-0.575145	0.295657	-0.495416
bioA	Adenosylmethionine-8-amino-7-oxononanoate aminotransferase BioA	Involved in bioconversion of pimelate into dethiobiotin [catalytic activity: S-adenosyl-L-methionine + 8-amino-7- oxononanoate = S-adenosyl-4-methylthio-2-oxobutanoate + 7,8- diaminononanoate]. Supposedly involved in stationary-phase survival.	P9WQ81	Rv1568	Mb1595	intermediary metabolism and respiration	46.319	9	43.5	0	90.492	27.1688	27.2034	27.1411	27.2381	27.8916	27.0909	27.1646	27.8686	27.2911	27.2058	27.7144	27.0368	0.292971	-0.147921	0.0985908	0.0878455	0.153854	0.1224
Rv1591	Probable transmembrane protein	Function unknown	P9WLT5	Rv1591	Mb1617	cell wall and cell processes	20.298	4	30.6	0	99.531	23.3929	23.8021	23.6039	24.0562	24.4556	24.5784	24.0215	23.7631	24.7123	24.3748	23.6572	23.4414	0.298394	-0.224843	0.767697	0.538932	0.355005	0.341192
Rv1597	Hypothetical protein	Unknown	O06593	Rv1597	Mb1623	conserved hypotheticals	28.038	11	58.3	0	160.08	24.0974	24.5601	23.5003	23.0003	25.0281	23.899	26.3449	25.9216	23.3301	24.7142	24.0009	25.0416	0.542267	-0.532961	0.388008	-0.60978	0.244473	0.613337
chaA	Probable ionic transporter integral membrane protein ChaA	Involved in transport of ions (presumably calcium) across the membrane. Responsible for the translocation of the substrate across the membrane.	O53910	Rv1607	Mb1633	cell wall and cell processes	36.771	3	7.2	0	65.452	23.9326	22.8275	25.8915	24.1701	25.2831	23.4732	23.2041	24.3778	24.0958	23.8364	23.1947	23.6907	0.282707	0.64324	0.583552	0.734863	0.324218	0.318583
Rv2468c	Conserved protein	Function unknown	P9WLA7	Rv2468c	Mb2495c	conserved hypotheticals	17.288	9	85	0	228.07	27.9861	27.6705	27.7413	23.2621	27.82	27.5634	27.8865	27.6816	27.62	27.9488	27.7705	28.2248	0.485529	-0.182056	0.523062	-1.7662	0.747668	-0.252032
Rv1615	Probable membrane protein	Unknown	O06132	Rv1615	Mb1641	cell wall and cell processes	15.442	4	15.8	0	93.369	23.9669	24.6543	24.1678	24.1577	23.859	23.0771	24.0048	24.159	23.8324	23.3396	23.7657	23.6226	1.34228	0.687031	0.12963	0.121993	1.26572	0.422803
Rv2473	Possible alanine and proline rich membrane protein	Unknown	O53200	Rv2473	Mb2500	cell wall and cell processes	25.133	9	45	0	248.48	22.9685	23.7254	23.8802	23.8621	24.6241	24.3913	22.4267	24.2482	23.4126	25.4789	23.8868	23.257	0.402505	-0.682864	0.0414081	0.0849616	0.42721	-0.845066
metH	5-methyltetrahydrofolate--homocystein methyltransferase MetH (methionine synthase, vitamin-B12 dependent isozyme) (ms)	Involved in biosynthesis of methionine (at the terminal step) [catalytic activity: 5-methyltetrahydrofolate + L-homocysteine = tetrahydrofolate + L-methionine].	O33259	Rv2124c	Mb2148c	intermediary metabolism and respiration	130.32	19	20.3	0	66.232	23.8139	23.447	23.6624	24.6165	23.4621	24.4772	24.0182	23.0683	23.148	23.8587	25.4533	24.6029	0.988902	-0.997209	0.31578	-0.453031	1.04393	-1.22681
Rv2129c	Probable oxidoreductase	Unknown	O33263	Rv2129c	Mb2153c	intermediary metabolism and respiration	31.331	15	58.4	0	45.699	25.9425	25.4848	25.6819	25.7811	25.0962	25.8203	26.1533	25.8798	26.0456	26.6991	25.9871	26.6057	1.31191	-0.727556	1.25175	-0.864759	0.786961	-0.404395
Rv2135c	Conserved protein	Unknown	O06240	Rv2135c	Mb2159c	conserved hypotheticals	25.122	12	58.5	0	32.305	26.3212	26.326	26.4487	26.5087	26.8154	26.3534	26.3608	26.4741	26.4944	26.491	25.9155	26.4475	0.159562	0.0806561	0.526278	0.274518	0.346363	0.15844
parE2	Possible toxin ParE2	Unknown	P9WHG5	Rv2142c	Mb2166c	virulence, detoxification, adaptation	12.313	4	45.7	0	8.2354	23.3752	24.217	23.7874	24.0209	23.7069	23.6434	24.2218	23.2449	23.5551	24.0059	21.8551	24.0218	0.261927	0.498941	0.272841	0.496089	0.187121	0.379646
bkdC	Probable branched-chain keto acid dehydrogenase E2 component BkdC	Involved in energy metabolism. The branched-chain alpha-keto acid dehydrogenase complex catalyzes the overall conversion of branched chain alpha-keto acids to acyl-CoA and CO2. It contains multiple copies of three enzymatic components: branched-chain alpha-keto acid decarboxylase (E1), lipoamide acyltransferase (E2) and lipoamide dehydrogenase (E3).	O06159	Rv2495c	Mb2523c	intermediary metabolism and respiration	41.061	11	35.4	0	10.979	26.0196	25.0736	24.4937	24.8078	24.0253	25.3644	25.2096	24.7639	24.7646	23.3356	25.0417	25.3492	0.332796	0.620119	0.0748432	0.15701	0.202009	0.337182
murF	Probable UDP-N-acetylmuramoylalanyl-D-glutamyl-2,6-diaminopimelate-D-alanyl-D-alanyl ligase MurF	Involved in cell wall formation; peptidoglycan biosynthesis.	P9WJL1	Rv2157c	Mb2181c	cell wall and cell processes	51.632	11	41.8	0	56.54	25.7854	24.5283	23.1684	24.9943	24.6359	26.2849	24.2132	23.4293	26.264	24.6596	26.4021	25.7678	0.540712	-1.11579	0.160209	-0.304801	0.42103	-0.974335
rpsA	30S ribosomal protein S1 RpsA	Binds mRNA; thus facilitating recognition of the initiation point. It is needed to translate mRNA with a short shine-dalgarno (SD) purine-rich sequence.	P9WH43	Rv1630	Mb1656	information pathways	53.231	52	80	0	323.31	32.9419	32.9057	32.7769	32.7263	32.7874	32.6694	32.7126	32.5517	32.7828	32.9774	32.7669	32.8043	0.111947	0.0253105	0.765505	-0.121827	0.821466	-0.167132
fadE19	Possible acyl-CoA dehydrogenase FadE19 (MMGC)	Function unknown, but seems involved in metabolism of small branched-chain fatty acids and macrolide antibiotic production. Catalyses the alpha, beta-dehydrogenation of acyl-CoA esters and transfer electrons to ETF, the electron transfer protein.	I6Y0W5	Rv2500c	Mb2528c	lipid metabolism	41.916	11	41.6	0	35.427	24.3158	24.3395	23.5551	24.2348	22.8542	24.4857	24.4425	23.5077	25.0947	24.0344	24.9431	24.3967	0.453069	-0.387942	0.45176	-0.599869	0.072462	-0.109748
Rv2510c	Conserved protein	Function unknown	I6Y0X6	Rv2510c	Mb2538c	conserved hypotheticals	56.546	9	19.7	0	74.83	23.3547	24.2296	24.2898	23.7151	24.0135	23.0278	23.7822	24.069	23.9422	23.5077	23.7835	23.9254	0.268973	0.219186	0.184862	-0.153377	0.5787	0.1923
lppM	Probable conserved lipoprotein LppM	Unknown	O53505	Rv2171	Mb2193	cell wall and cell processes	23.846	8	45.4	0	49.918	24.2216	24.0217	23.95	22.9935	23.4816	25.2994	23.6324	23.4828	23.0918	24.265	23.6791	22.0189	0.47601	0.743401	0.245595	0.603848	0.0399644	0.081316
Rv2520c	Possible conserved membrane protein	Unknown	I6XEI0	Rv2520c	Mb2549c	cell wall and cell processes	8.3737	3	38.7	0	69.101	26.2951	26.1428	26.098	26.0047	23.9504	23.2011	26.3192	26.5815	27.5155	26.8989	26.2495	26.6352	0.985842	-0.41589	1.20856	-2.20911	0.198318	0.210868
argD	Probable acetylornithine aminotransferase ArgD	Arginine biosynthesis (fourth step) [catalytic activity: N2-acetyl-L-ornithine + 2-oxoglutarate = N-acetyl-L-glutamate 5-semialdehyde + L-glutamate]	P9WPZ7	Rv1655	Mb1683	intermediary metabolism and respiration	40.909	18	64.5	0	323.31	30.3558	30.3925	30.2925	29.8833	30.6946	30.2359	30.1178	30.2565	30.2575	30.3571	30.1077	30.0064	0.811993	0.189894	0.167688	0.114206	0.178379	0.0535577
vapB17	Possible antitoxin VapB17	Unknown	P9WJ49	Rv2526	Mb2555	virulence, detoxification, adaptation	8.2422	3	42.7	0	34.26	23.6116	23.1538	23.5804	24.4659	22.0528	24.0594	22.4409	23.4938	22.9227	24.8927	24.5596	24.2058	1.95411	-1.10409	0.59474	-1.02664	1.934	-1.60021
aroB	3-dehydroquinate synthase AroB	Involved at the second step in the biosynthesis of chorismate within the biosynthesis of aromatic amino acids (the shikimate pathway) [catalytic activity: 7-phospho-3-deoxy-arabino-heptulosonate = 3-dehydroquinate + orthophosphate].	P9WPX9	Rv2538c	Mb2567c	intermediary metabolism and respiration	38.119	7	40.1	0	72.638	25.2584	24.7491	23.3441	25.4208	23.345	25.3106	25.7704	23.2005	25.8303	24.1759	25.5123	25.8573	0.40322	-0.731325	0.226065	-0.489696	0.0874917	-0.248095
Rv2190c	Conserved hypothetical protein	Unknown	P9WHU3	Rv2190c	Mb2213c	virulence, detoxification, adaptation	39.756	7	19.2	0	12.145	24.7677	23.0511	23.3339	24.7544	22.8134	22.6303	22.8871	24.7873	24.5803	24.0247	23.7505	23.9578	0.132364	-0.193405	0.304198	-0.511642	0.102982	0.173911
qcrB	Probable ubiquinol-cytochrome C reductase QcrB (cytochrome B subunit)	Respiration	P9WP37	Rv2196	Mb2219	intermediary metabolism and respiration	61.014	23	35.9	0	323.31	28.0526	27.0566	27.5453	26.5603	26.9344	28.2814	27.8893	27.7488	27.2328	28.225	27.9725	28.593	0.983575	-0.711975	0.843879	-1.00483	1.11926	-0.639884
Rv1680	Hypothetical protein	Unknown	O33182	Rv1680	Mb1707	conserved hypotheticals	30.214	19	72.6	0	149.52	28.4182	28.3319	28.6505	28.3399	27.0397	28.6031	28.7539	28.8174	28.9491	28.5624	28.532	28.6851	0.523537	-0.126264	0.5453	-0.598929	1.53667	0.246949
Rv2571c	Probable transmembrane alanine and valine and leucine rich protein	Unknown	P9WL89	Rv2571c	Mb2601c	cell wall and cell processes	36.79	5	26.2	0	70.824	23.6779	24.3099	25.0207	23.9626	23.9736	23.5738	22.7168	23.6042	23.4304	23.7717	24.6331	23.7224	0.237	0.293766	0.252229	-0.205758	0.921565	-0.791931
Rv1728c	Conserved hypothetical protein	Function unknown	P71986	Rv1728c	Mb1757c	conserved hypotheticals	27.197	7	62.1	0	40.762	24.9792	23.3918	23.5061	24.2443	24.1551	24.4201	24.6668	23.6253	22.4891	25.0144	24.4186	23.8645	0.318167	-0.47347	0.177414	-0.159339	0.517763	-0.838783
gabT	4-aminobutyrate aminotransferase GabT (gamma-amino-N-butyrate transaminase) (GABA transaminase) (glutamate:succinic semialdehyde transaminase) (GABA aminotransferase) (GABA-at)	Involved in 4-aminobutyrate (GABA) degradation pathway [catalytic activity: 4-aminobutanoate + 2-oxoglutarate = succinate semialdehyde + L-glutamate].	P9WQ79	Rv2589	Mb2620	intermediary metabolism and respiration	46.812	25	66.4	0	189.41	28.5153	28.6449	28.5711	28.4442	28.9919	28.544	28.5709	28.5436	28.5384	29.0318	28.3825	28.6516	0.227311	-0.111549	0.0384345	-0.0286109	0.295864	-0.137643
Rv2597	Probable membrane protein	Unknown	P9WL73	Rv2597	Mb2628	cell wall and cell processes	21.943	8	62.1	0	52.657	23.6264	24.0359	23.33	23.8006	23.8314	26.0342	24.6807	25.2371	24.1332	24.3074	24.2567	23.9527	1.02526	-0.508173	0.196981	0.383131	0.69002	0.511363
pknF	Anchored-membrane serine/threonine-protein kinase PknF (protein kinase F) (STPK F)	Involved in signal transduction (via phosphorylation). Thought to be involved in membrane transport. Phosphorylates the peptide substrate myelin basic protein (MBP) at serine and threonine residues [catalytic activity: ATP + a protein = ADP + a phosphoprotein].	P9WI75	Rv1746	Mb1775	regulatory proteins	50.668	14	32.1	0	94.37	23.6281	23.87	23.5578	23.4077	23.7269	23.7854	23.0766	25.3145	23.898	24.1159	23.499	23.8007	0.233623	-0.119943	0.317191	-0.165231	0.161495	0.291182
glnA1	Glutamine synthetase GlnA1 (glutamine synthase) (GS-I)	Involved in glutamine biosynthesis [catalytic activity: ATP + L-glutamate + NH(3) = ADP + glutamine + orthophosphate].	P9WN39	Rv2220	Mb2244	intermediary metabolism and respiration	53.569	37	83.7	0	323.31	33.6582	33.5835	33.6397	33.7216	34.1525	33.6685	33.6843	33.9725	33.7142	34.2058	33.6189	33.4069	0.185711	-0.116753	0.134623	0.103663	0.0630721	0.04643
Rv2609c	Probable conserved membrane protein	Unknown	I6YDV4	Rv2609c	Mb2641c	cell wall and cell processes	38.096	14	53.6	0	44.196	23.7411	22.9728	23.0036	25.7007	24.4485	23.7931	23.677	24.4508	22.6969	24.3732	23.2801	23.1427	0.317774	-0.359491	0.701686	1.0488	0.00491412	0.00959587
Rv2226	Conserved protein	Unknown	P9WLH9	Rv2226	Mb2250	conserved hypotheticals	56.332	26	69.4	0	323.31	29.2551	28.6837	28.6979	29.1306	27.3906	29.3529	29.3083	28.8321	29.0653	28.0199	29.3574	29.2112	0.0114446	0.0160751	0.115149	-0.238124	0.175203	0.205767
Rv2230c	Conserved protein	Unknown	P9WFM1	Rv2230c	Mb2255c	conserved hypotheticals	39.597	12	31.7	0	80.799	28.0924	28.3074	28.2277	28.1369	28.2578	27.6886	28.1088	28.1932	28.2795	28.3309	27.8862	27.987	0.402743	0.141197	0.0638115	-0.0402374	0.366859	0.125813
TB31.7	Universal stress protein family protein TB31.7	Function unknown	P9WFD7	Rv2623	Mb2656	virulence, detoxification, adaptation	31.652	16	64.3	0	323.31	30.3891	30.2828	30.6513	31.3552	30.4378	31.0736	31.1335	30.7078	31.3279	30.1402	30.7807	30.9696	0.277517	-0.189104	0.36812	0.325365	0.616202	0.426231
kasB	3-oxoacyl-[acyl-carrier protein] synthase 2 KasB (beta-ketoacyl-ACP synthase) (KAS I)	Involved in fatty acid biosynthesis (mycolic acids synthesis); involved in meromycolate extension. Catalyzes the condensation reaction of fatty acid synthesis by the addition to an acyl acceptor of two carbons from malonyl-ACP [catalytic activity: acyl-[acyl-carrier protein] + malonyl-[acyl-carrier protein] = 3-oxoacyl-[acyl-carrier protein] + [acyl-carrier protein] + CO(2)].	P9WQD7	Rv2246	Mb2270	lipid metabolism	44.277	27	89	0	323.31	32.3845	32.4151	32.3785	31.9174	30.4408	32.5545	32.1899	32.2098	32.193	30.0688	32.266	32.2934	0.504336	0.849936	0.0331099	0.0948296	0.372131	0.654823
eccB5	ESX conserved component EccB5. ESX-5 type VII secretion system protein. Probable membrane protein.	Function unknown	P9WNQ9	Rv1782	Mb1811	cell wall and cell processes	53.721	20	59.9	0	257.08	25.9766	25.2365	25.4234	22.4467	23.4639	25.9575	25.6349	25.7939	26.1837	25.231	26.2732	26.2332	0.37871	-0.367011	0.826374	-1.95643	0.0373419	-0.0416171
Rv2260	Conserved hypothetical protein	Unknown	O53534	Rv2260	Mb2284	conserved hypotheticals	22.137	3	40.3	0	29.631	26.7585	26.7501	23.9694	26.8688	25.0421	27.0844	26.9903	26.8898	27.0645	26.7691	26.7406	26.8056	0.436547	-0.945786	0.272118	-0.440018	1.7505	0.209749
Rv2271	Conserved hypothetical protein	Unknown	P9WLF7	Rv2271	Mb2294	conserved hypotheticals	11.535	2	32.3	0	102.99	26.5414	27.0455	26.4677	27.1396	27.7054	26.2458	26.6291	26.7142	26.0846	26.7251	25.5963	26.766	0.310298	0.322428	0.511418	0.667785	0.0940678	0.113535
esxN	Putative ESAT-6 like protein EsxN (ESAT-6 like protein 5)	Function unknown	P9WNJ3	Rv1793	Mb1821	Cell wall and cell processes	9.9418	2	43.6	0	323.31	25.9297	26.2986	26.2012	26.7972	26.6948	26.2175	26.3718	26.4677	26.2624	25.5678	25.743	25.9142	1.26487	0.401484	1.80883	0.828218	2.23931	0.625615
Rv1812c	Probable dehydrogenase	Function unknown; probably involved in cellular metabolism	P9WJJ1	Rv1812c	Mb1842c	intermediary metabolism and respiration	41.94	15	56.8	0	143.83	26.3624	26.066	27.3987	24.5516	25.6878	26.8186	28.2682	27.0874	27.0475	22.9617	26.9887	27.1737	0.249129	0.900981	0.00473869	-0.0220242	0.543174	1.75966
aftC	Possible arabinofuranosyltransferase AftC	Involved in the biosynthesis of the mycobacterial cell wall arabinan	P9WMZ7	Rv2673	Mb2692	cell wall and cell processes	48.914	10	27	0	126.15	22.4541	24.2635	23.6953	23.182	22.1197	24.9388	23.4871	25.1637	24.1956	24.3612	23.7022	25.3247	0.626679	-0.991784	0.481223	-1.04923	0.0954049	-0.180601
echA15	Probable enoyl-CoA hydratase EchA15 (enoyl hydrase) (unsaturated acyl-CoA hydratase) (crotonase)	Could possibly oxidize fatty acids using specific components [catalytic activity: (3S)-3-hydroxyacyl-CoA = trans-2(or 3)-enoyl-CoA + H(2)O].	I6YA03	Rv2679	Mb2698	lipid metabolism	29.635	11	59.1	0	234.66	29.2985	29.5369	29.6134	29.6541	29.9258	29.5592	29.5838	29.5411	29.5834	29.8726	29.4882	29.5219	0.393413	-0.144644	0.199575	0.0854505	0.178508	-0.0581328
Rv2298	Conserved protein	Unknown	P9WQA7	Rv2298	Mb2320	conserved hypotheticals	34.986	18	70.6	0	160.37	26.5646	26.7892	27.0121	27.1246	26.1713	27.1669	26.9891	26.4994	27.1928	26.7272	26.464	27.0105	0.0960164	0.0547396	0.0853884	0.0870253	0.243445	0.159878
pgsA1	Probable CDP-diacylglycerol--glycerol-3-phosphate 3-phosphatidyltransferase PgsA2 (PGP synthase) (phosphatidylglycerophosphate synthase) (3-phosphatidyl-1'-glycerol-3'phosphate synthase)	Thought to be involved in cardiolipin biosynthesis; generates cardiolipin from phosphatidylglycerol and CDP-diacylglycerol [catalytic activity: may be: phosphatidylglycerol + phosphatidylglycerol -> cardiolipin + glycerol, or: CDP-diacylglycerol + glycerol 3-phosphate = CMP + 3-(3-phosphatidyl)-glycerol 1-phosphate].	P9WPG5	Rv1822	Mb1853	lipid metabolism	22.911	4	23.4	0	59.535	23.9942	24.4703	23.8451	25.558	24.1216	24.3093	23.6889	25.21	24.5209	23.9095	23.8948	24.233	0.15547	0.0907758	0.631485	0.650561	0.435407	0.46081
arsB1	Probable arsenic-transport integral membrane protein ArsB1	Thought to be involved in transport of arsenical compounds across the membrane (export): arsenic resistance by an export mechanism. Responsible for the translocation of the substrate across the membrane.	P9WPD7	Rv2685	Mb2704	cell wall and cell processes	45.237	2	4.4	0	8.4413	23.5286	23.7779	22.84	24.9782	23.6677	24.0822	23.8038	23.0088	24.1786	22.5485	23.3113	22.5395	0.69952	0.582387	1.44611	1.44293	0.941138	0.863953
Rv2314c	Conserved protein	Function unknown	P71898	Rv2314c	Mb2341c	conserved hypotheticals	48.711	28	76.4	0	222.66	28.9254	29.042	28.8265	28.6429	29.2379	28.9991	29.0663	28.9851	29.1077	29.5145	29.1245	28.6709	0.274254	-0.171967	0.182737	-0.143321	0.0714056	-0.0502377
Rv1855c	Possible oxidoreductase	Function unknown; probably involved in cellular metabolism	P95159	Rv1855c	Mb1886c	intermediary metabolism and respiration	33.22	15	54.4	0	234.65	29.7515	29.6047	29.4585	29.5888	28.4229	29.3667	29.433	29.4375	29.5713	29.782	29.3092	29.7202	0.00212739	0.00111262	0.545712	-0.477663	0.326326	-0.123164
suhB	Inositol-1-monophosphatase SuhB	Involved in inositol phosphate metabolism. It is responsible for the provision of inositol required for synthesis of phosphatidylinositol and polyphosphoinositides. Key enzyme of the phosphatidyl inositol signaling pathway. [catalytic activity: myo-inositol 1-phosphate + H(2)O = myo-inositol + phosphate]	P9WKI9	Rv2701c	Mb2720c	intermediary metabolism and respiration	30.027	11	57.9	0	197.04	24.92	22.8166	25.4548	24.208	23.3491	25.6396	24.0704	25.4717	25.2241	23.4408	25.991	25.6059	0.211017	-0.615413	0.232103	-0.613654	0.0338486	-0.0905202
Rv2342	Conserved hypothetical protein	Function unknown	P95238	Rv2342	Mb2371	conserved hypotheticals	9.2055	6	77.6	0	27.88	22.9284	23.4862	22.2425	24.0301	23.5419	23.8911	23.3274	23.3253	23.3686	24.7347	24.6325	24.605	2.09359	-1.77174	2.2897	-0.836364	5.21414	-1.31698
glyQS	Probable glycyl-tRNA synthetase GlyS (glycine--tRNA ligase) (GLYRS)	Involved in translation mechanisms [catalytic activity: ATP + L-glycine + tRNA(GLY) = AMP + pyrophosphate + L-glycyl-tRNA(GLY)].	P9WFV7	Rv2357c	Mb2378c	information pathways	52.937	14	41.3	0	41.336	26.2726	25.3776	25.5631	25.9025	23.0103	26.1293	25.8149	24.3388	25.4367	26.8447	25.9866	26.1061	0.683023	-0.574722	0.553428	-1.29847	1.01145	-1.11569
amiA2	Probable amidase AmiA2 (aminohydrolase)	Generates monocarboxylate from monocarboxylic acid amide [catalytic activity: a monocarboxylic acid amide + H(2)O = a monocarboxylate + NH(3)].	P9WQ99	Rv2363	Mb2384	intermediary metabolism and respiration	50.883	17	46.3	0	234.58	24.7857	23.5508	23.4088	23.4896	23.278	24.6126	24.3605	23.7335	24.3905	24.5617	23.6405	24.3755	0.20636	-0.277479	0.328021	-0.399173	0.0295869	-0.0310904
ideR	Iron-dependent repressor and activator IdeR	Transcriptional regulatory protein (repressor and activator), iron-binding repressor of siderophore biosynthesis and iron uptake. Seems to regulate a variety of genes encoding a variety of proteins e.g. transporters, proteins involved in siderophore synthesis and iron storage, members of the PE/PPE family, enzymes involved in lipid metabolism, transcriptional regulatory proteins, etc. Also activa…	P9WMH1	Rv2711	Mb2730	regulatory proteins	25.233	22	95.2	0	323.31	30.5749	30.3591	30.3909	30.9266	31.3108	30.4923	30.5984	30.7229	30.6532	31.0492	30.0995	30.6724	0.227882	-0.165424	0.34523	0.30285	0.0638486	0.0511144
Rv1871c	Conserved protein	Function unknown	P95144	Rv1871c	Mb1902c	conserved hypotheticals	14.681	5	38.8	0	24.714	22.6034	23.2838	24.1606	22.5818	25.0411	24.0733	24.4939	23.3143	24.8782	24.0333	23.5604	22.483	0.00490923	-0.00963847	0.251994	0.539828	0.591503	0.869905
sir	Ferredoxin-dependent sulfite reductase SirA	Catalyzes the reduction of sulfite to sulfide, in the biosynthesis of sulfur-containing amino acids and co-factors	P9WJ03	Rv2391	Mb2412	intermediary metabolism and respiration	62.111	40	65.8	0	323.31	30.5997	30.6104	30.567	30.6413	31.3451	30.4408	30.5606	30.5279	30.4657	31.166	30.1764	30.5445	0.0431677	-0.0365906	0.171017	0.180106	0.141719	-0.110959
pknB	Transmembrane serine/threonine-protein kinase B PknB (protein kinase B) (STPK B)	Involved in signal transduction (via phosphorylation). Thought to regulate cell division/differentiation. Can phosphorylate the peptide substrate myelin basic protein (MBP) [catalytic activity: ATP + a protein = ADP + a phosphoprotein].	P9WI81	Rv0014c	Mb0014c	regulatory proteins	66.509	33	72.5	0	323.31	23.8217	21.739	22.4498	23.853	24.4483	23.9708	23.2864	23.857	22.8978	24.2805	24.7843	22.4713	0.560028	-1.17526	0.123637	0.245318	0.263154	-0.498303
bfr	Probable bacterioferritin BfrA	Involved in iron storage (may perform analogous functions in iron detoxification and storage as that of animal ferritins); ferritin is an intracellular molecule that stores iron in a soluble, nontoxic, readily available form. The functional molecule, which is composed of 24 chains, is roughly spherical and contains a central cavity in which the polymeric ferric iron core is deposited.	P9WPQ9	Rv1876	Mb1907	intermediary metabolism and respiration	18.34	15	96.9	0	323.31	31.1282	31.7205	31.6058	31.6525	31.7697	31.2813	31.2311	31.9695	31.1136	31.6898	31.0241	31.0098	0.350741	0.243636	0.537029	0.32661	0.219474	0.196824
fhaA	Conserved protein with FHA domain, FhaA	Signal transduction	P71590	Rv0020c	Mb0020c	regulatory proteins	56.003	26	75.6	0	216.42	27.9289	28.7084	28.6936	28.729	29.8561	28.1351	28.5675	28.8248	28.7364	29.3971	27.5337	27.8674	0.101468	0.177558	0.347809	0.640648	0.31328	0.443511
Rv0025	Conserved hypothetical protein	Function unknown	P9WMA1	Rv0025	Mb0026	conserved hypotheticals	13.116	7	64.2	0	43.978	23.3947	23.4571	22.2273	23.9913	23.3357	24.2895	23.1629	24.0597	23.632	23.5304	24.172	24.3054	0.981833	-0.976231	0.129623	-0.130431	0.472507	-0.384362
Rv2732c	Probable conserved transmembrane protein	Unknown	O33237	Rv2732c	Mb2751c	cell wall and cell processes	21.989	7	30.9	0	90.646	24.0888	24.8601	23.119	23.4763	23.756	23.7437	23.4485	23.7859	24.1841	23.8332	24.498	23.411	0.0634973	0.108627	0.317573	-0.255369	0.101681	-0.107851
Rv2413c	Conserved hypothetical protein	Function unknown	P71730	Rv2413c	Mb2436c	conserved hypotheticals	33.131	5	22.5	0	33.177	24.1553	23.3877	23.7083	24.5856	23.4456	23.5326	23.8104	23.0021	24.0162	24.1028	23.257	23.8791	0.00402881	0.00414912	0.0862966	0.108292	0.125215	-0.136733
Rv1885c	Chorismate mutase	Involved in the shikimate pathway. Converts chorismate to prephenate in the biosynthesis of tyrosine and phenylalanine.	P9WIB9	Rv1885c	Mb1917c	intermediary metabolism and respiration	21.945	11	55.8	0	37.438	23.0182	23.97	24.4911	23.032	24.3923	22.8491	24.7753	24.629	25.158	24.95	22.5767	22.7767	0.169438	0.391968	0.00361885	-0.00998561	0.849584	1.41963
gpgP	Glucosyl-3-phosphoglycerate phosphatase GpgP	Involved in the biosynthesis of methylglucose lipopolysaccharide (MGLP). Catalyzes the dephosphorylation of glucosyl-3-phosphoglycerate (GPG) to glucosylglycerate (GG). [Catalytic activity: glucosyl-3-phosphoglycerate + H2O = glucosylglycerate + phosphate]	P9WIC7	Rv2419c	Mb2442c	intermediary metabolism and respiration	24.174	12	59.2	0	173.87	28.4387	28.5751	28.5205	28.4271	28.7581	28.5482	28.4634	28.6181	28.4409	28.7774	28.1493	28.5502	0.0344061	0.019118	0.154029	0.0855134	0.0264297	0.0151246
PE25	PE family protein PE25	Function unknown	I6X486	Rv2431c	Mb2457c	PE/PPE	10.687	7	88.9	0	127.53	24.4499	23.3779	24.535	23.7201	22.4371	24.0873	23.6883	24.48	22.1469	23.9063	22.7446	23.1261	0.786857	0.861906	0.0916467	0.155801	0.0829057	0.179412
Rv0052	Conserved protein	Function unknown	I6Y6S3	Rv0052	Mb0053	conserved hypotheticals	20.387	9	65.8	0	55.094	25.394	25.5675	25.0094	25.5642	25.642	25.7797	25.4644	24.9073	25.5738	25.7609	25.6529	25.6291	0.986435	-0.357328	0.0903233	-0.0190093	0.804155	-0.365783
Rv0060	Conserved hypothetical protein	Function unknown	O53605	Rv0060	Mb0061	conserved hypotheticals	38.563	7	22.2	0	16.541	24.9195	24.0965	24.2296	24.0931	23.0198	24.4671	23.9115	22.7404	22.7034	23.3711	27.4413	23.3195	0.0747019	-0.29542	0.233117	-0.850616	0.487457	-1.59219
vapC1	Possible toxin VapC1	Unknown	P9WFC1	Rv0065	Mb0066	virulence, detoxification, adaptation	14.371	9	60.9	0	65.939	26.4709	26.0129	26.293	26.5454	26.2826	26.7389	26.3874	26.4262	26.2418	26.8478	26.1372	26.6826	0.515462	-0.296934	0.045479	-0.0335477	0.387466	-0.204084
glyA2	Serine hydroxymethyltransferase GlyA2 (serine methylase 2) (SHMT 2)	Key enzyme in the biosynthesis of purines, lipids, other components. Interconversion of serine and glycine [catalytic activity: 5,10-methylenetetrahydrofolate + glycine + H2O = tetrahydrofolate + L-serine].	P9WGI7	Rv0070c	Mb0071c	intermediary metabolism and respiration	45.525	5	16.5	0	41.666	24.1601	24.136	24.7681	23.7355	24.9108	24.2117	23.7671	23.6826	22.9644	23.5088	24.2869	23.5592	0.809667	0.569727	0.518948	0.501008	0.366269	-0.313628
Rv2449c	Conserved protein	Unknown	O53176	Rv2449c	Mb2476c	conserved hypotheticals	44.378	6	22.9	0	15.595	25.0098	23.9881	24.3602	23.6886	24.0623	24.8674	25.068	25.3993	24.7485	23.4409	24.497	22.9122	0.68753	0.835988	0.434142	0.589383	1.35413	1.45524
korA	Probable oxidoreductase (alpha subunit)	Function unknown; probably involved in cellular metabolism.	O53182	Rv2455c	Mb2482c	intermediary metabolism and respiration	69.182	36	73.2	0	323.31	29.8064	28.9491	29.1385	29.6268	26.6547	30.1294	30.0176	29.2603	29.735	27.166	30.0213	29.9546	0.0915336	0.250719	0.0587563	-0.243651	0.256586	0.623664
clpP1	Probable ATP-dependent CLP protease proteolytic subunit 1 ClpP1 (endopeptidase CLP)	CLP cleaves peptides in various proteins in a process that requires ATP hydrolysis. CLP may be responsible for a fairly general and central housekeeping function rather than for the degradation of specific substrates.	P9WPC5	Rv2461c	Mb2488c	intermediary metabolism and respiration	21.707	12	63	0	323.31	30.0719	29.8165	29.6642	30.5583	29.2848	30.4311	30.3502	30.1183	29.8447	29.394	29.9024	30.5048	0.0858418	-0.0828679	0.110386	0.157639	0.184532	0.17064
Rv0083	Probable oxidoreductase	Function unknown; probably involved in cellular metabolism.	P9WIW3	Rv0083	Mb0086	intermediary metabolism and respiration	65.627	11	16.6	0	101.73	22.9844	24.2699	23.4822	24.6666	24.3663	24.959	23.3059	23.996	24.9892	24.6801	23.702	23.8423	0.440614	-0.49593	0.775631	0.589155	0.012762	0.0222518
pepN	Probable aminopeptidase N PepN (Lysyl aminopeptidase) (LYS-AP) (alanine aminopeptidase)	Aminopeptidase with broad substrate specificity to several peptides (could preferentially cleave leucine, arginine and lysine in peptide-bond-containing substrates).	L7N655	Rv2467	Mb2494	intermediary metabolism and respiration	94.284	52	71.1	0	323.31	31.193	31.2274	31.2858	31.1269	31.1786	31.2935	31.2768	31.2728	31.3976	31.0256	31.3673	31.2779	0.037807	0.0117925	0.0740026	-0.0239334	0.346695	0.092137
Rv0088	Possible polyketide cyclase/dehydrase	Unknown	P9WM73	Rv0088	Mb0091	lipid metabolism	24.649	14	54.9	0	254.71	29.3316	29.4318	29.3815	29.156	28.822	29.6012	29.8053	29.2699	29.4637	29.4933	29.5695	29.5531	1.87623	-0.15699	0.693816	-0.345587	0.0560874	-0.0256958
Rv1919c	Conserved protein	Function unknown	O53961	Rv1919c	Mb1954c	conserved hypotheticals	16.803	15	73.4	0	178.9	25.5703	25.1158	25.932	26.5351	25.5602	26.1224	26.2435	26.3525	26.3315	26.424	25.5055	26.2047	0.624834	-0.505409	0.0235156	0.0278308	0.401445	0.264446
Rv0093c	Probable conserved membrane protein	Unknown	P9WM69	Rv0093c	Mb0096c	cell wall and cell processes	29.631	8	28.4	0	5.7247	24.9278	23.1324	23.3339	24.4823	23.9874	23.2576	23.6131	24.2358	24.3688	25.0947	24.2489	24.0722	0.445946	-0.673949	0.519893	-0.562836	0.43637	-0.399366
ettA	Probable macrolide-transport ATP-binding protein ABC transporter	Thought to be involved in active transport of macrolide across the membrane (export): macrolide antibiotics resistance by an export mechanism. Responsible for energy coupling to the transport system.	P9WQK3	Rv2477c	Mb2504c	cell wall and cell processes	61.919	38	67.7	0	323.31	30.8265	30.1285	30.2506	30.6252	28.1017	30.6591	30.5825	29.7354	30.3074	29.29	30.7624	30.4977	0.163886	0.218482	0.15064	-0.388016	0.0160704	0.0250689
Rv1924c	Unknown protein	Unknown	P95289	Rv1924c	Mb1959c	conserved hypotheticals	14.166	3	22.2	0	7.8529	23.958	23.5648	23.9779	24.4708	22.4725	23.3843	22.906	24.4948	24.8118	23.646	23.5389	24.159	0.0787652	0.0522671	0.216549	-0.338767	0.177353	0.289539
fadD7	Probable fatty-acid-CoA ligase FadD7 (fatty-acid-CoA synthetase) (fatty-acid-CoA synthase)	Function unknown, but involved in lipid degradation.	O07169	Rv0119	Mb0123	lipid metabolism	55.158	21	57.9	0	282.34	27.9273	27.3831	26.8834	26.8369	25.0007	27.7637	27.4614	27.0618	27.8064	23.2272	27.6745	27.423	0.365683	1.28972	0.0916263	0.425524	0.385346	1.33496
scoA	Probable succinyl-CoA:3-ketoacid-coenzyme A transferase (alpha subunit) ScoA (3-oxo acid:CoA transferase) (OXCT A) (succinyl-CoA:3-oxoacid-coenzyme A transferase)	Involved in fatty acid degradation/synthesis [catalytic activity: succinyl-CoA + a 3-oxo acid = succinate + a 3-oxo-acyl-CoA].	P9WPW5	Rv2504c	Mb2532c	lipid metabolism	26.275	13	64.5	0	157.5	26.8881	26.9959	27.0548	26.8525	27.5432	26.7656	26.9354	26.7708	26.8912	27.0068	26.2457	26.6334	0.712385	0.350956	0.5736	0.425108	0.453949	0.237159
Rv2509	Probable short-chain type dehydrogenase/reductase	Function unknown; possibly involved in cellular metabolism.	I6Y9I3	Rv2509	Mb2537	intermediary metabolism and respiration	28.013	13	58.6	0	79.148	23.5218	23.1979	24.5937	23.546	24.28	23.6465	24.896	24.5994	24.9138	24.1773	24.6977	24.6704	0.752244	-0.744004	1.13905	-0.69094	0.660463	0.287945
Rv1944c	Conserved protein	Function unknown	P95270	Rv1944c	Mb1979c	conserved hypotheticals	20.795	5	61.2	0	23.081	23.0733	27.3598	24.1712	23.8288	24.1918	26.813	24.9395	27.4634	27.1587	23.4042	26.7229	26.8608	0.17612	-0.794542	0.186592	-0.718082	0.245412	0.857913
Rv0130	Probable 3-hydroxyl-thioester dehydratase	Unknown	P9WNP3	Rv0130	Mb0135	intermediary metabolism and respiration	16.007	7	66.2	0	125.21	27.4682	27.6193	27.7872	27.144	27.3043	27.656	27.4445	27.4423	27.6722	27.4593	27.3411	27.3287	1.15627	0.248529	0.0174952	-0.00826073	0.75838	0.143309
Rv0149	Possible quinone oxidoreductase (NADPH:quinone oxidoreductase) (zeta-crystallin)	Possibly binds NADP and acts through a one-electron transfer process. Quinones are supposed to be the best substrates. May act in the detoxification of xenobiotics [catalytic activity: NADPH + quinone = NADP+ + semiquinone]	P96826	Rv0149	Mb0154	intermediary metabolism and respiration	33.278	11	67.1	0	79.018	26.8134	27.1653	26.8754	26.4901	24.2535	26.4175	27.1417	26.9012	27.0777	26.4767	27.4862	27.2294	0.128639	-0.112776	0.780518	-1.34372	0.0257662	-0.0239417
fadE2	Probable acyl-CoA dehydrogenase FadE2	Function unknown, but involved in lipid degradation.	P96831	Rv0154c	Mb0159c	lipid metabolism	44.343	23	65.3	0	323.31	29.0581	28.8928	28.8989	29.1977	28.516	28.9706	28.9451	28.8956	28.994	28.913	28.8719	29.1438	0.0933313	-0.026268	0.138404	-0.0814482	0.128649	-0.0312881
Rv2536	Probable conserved transmembrane protein	Unknown	P95017	Rv2536	Mb2565	cell wall and cell processes	24.626	8	39.6	0	265.27	22.3945	23.8717	24.2997	22.0562	24.6564	23.4844	24.6399	24.0405	24.0441	24.5885	23.7334	22.9237	0.109084	-0.226622	0.145553	-0.349553	0.401094	0.492899
TB18.5	Conserved protein TB18.5	Function unknown	L7N657	Rv0164	Mb0169	conserved hypotheticals	17.738	9	70.8	0	238.15	29.7806	29.642	29.377	29.4376	30.4417	29.7353	29.6618	30.8881	29.4957	30.3729	29.9188	29.9783	1.24226	-0.490116	0.264143	-0.218426	0.0559541	-0.0748094
mce1A	Mce-family protein Mce1A	Unknown, but thought to be involved in host cell invasion (entry and survival inside macrophages).	Q79FZ9	Rv0169	Mb0175	virulence, detoxification, adaptation	47.786	10	35.9	0	29.738	23.9848	23.3162	24.8387	23.7046	23.8212	23.8397	23.7852	24.3989	24.4683	24.0175	22.2648	24.1685	0.304187	0.562967	0.190625	0.304884	0.493538	0.733831
mce1F	Mce-family protein Mce1F	Unknown, but thought involved in host cell invasion.	L0T2W6	Rv0174	Mb0180	virulence, detoxification, adaptation	54.021	18	49.3	0	172.66	24.1777	23.2671	23.6716	23.4506	24.3875	24.0331	23.5776	24.7279	24.8372	25.3321	23.1354	23.3437	0.112212	-0.231608	0.00875316	0.019996	0.213291	0.443804
Rv2553c	Probable conserved membrane protein	Unknown	I6XEK6	Rv2553c	Mb2583c	cell wall and cell processes	45.473	10	30.5	0	64.318	25.0145	23.5771	24.2953	24.569	23.8787	23.4244	22.9711	23.3654	23.869	23.6249	24.766	23.4678	0.230627	0.342745	0.00274702	0.00443331	0.496217	-0.551084
Rv2560	Probable proline and glycine rich transmembrane protein	Unknown	P9WLA1	Rv2560	Mb2590	cell wall and cell processes	33.124	4	10.8	0	2.8309	23.1094	23.8182	22.649	25.586	24.5679	23.8272	23.6969	23.7609	25.2248	23.2862	22.4594	23.4395	0.102913	0.130559	1.26347	1.59874	0.932498	1.16589
Rv1995	Unknown protein	Unknown	P9WLP3	Rv1995	Mb2018	conserved hypotheticals	28.072	13	63.9	0	67.12	24.1093	24.736	23.8279	24.5912	24.6879	22.4578	24.4156	23.4129	22.6821	23.6484	24.6521	23.8137	0.17168	0.186343	0.0548146	-0.125767	0.380153	-0.534548
lppU	Probable lipoprotein LppU	Unknown	I6XFA6	Rv2784c	Mb2807c	cell wall and cell processes	18.133	5	47.4	0	127.7	23.4584	24.1672	23.6295	23.1849	25.1402	23.4465	23.2749	23.9776	24.0874	24.0786	23.7394	22.7176	0.200195	0.239823	0.217601	0.41197	0.216417	0.268082
ilvD	Probable dihydroxy-acid dehydratase IlvD (dad)	Involved in valine and isoleucine biosynthesis (at the fourth step) [catalytic activity: 2,3-dihydroxy-3-methylbutanoate = 3-methyl-2- oxobutanoate + H(2)O].	P9WKJ5	Rv0189c	Mb0195c	intermediary metabolism and respiration	59.351	30	75.5	0	323.31	30.8887	30.8061	30.8711	30.6683	30.9839	30.7821	30.7978	30.8602	30.8318	30.9854	30.6329	30.8847	0.06776	0.0209287	0.05661	-0.0228869	0.0136165	-0.00437991
ltp1	Probable lipid-transfer protein Ltp1	Possibly catalyzes the transfer of a great variety of lipids between membranes.	O33332	Rv2790c	Mb2813c	cell wall and cell processes	42.904	19	63.8	0	295.05	28.8577	29.2047	29.1425	29.2841	29.5529	29.0804	29.1859	29.3282	29.2896	29.4919	29.3589	29.1618	0.87298	-0.2692	0.066144	-0.031709	0.265113	-0.0696189
Rv2005c	Universal stress protein family protein	Unknown	P9WLN1	Rv2005c	Mb2028c	virulence, detoxification, adaptation	30.985	4	18	0	24.981	24.543	24.208	23.4163	24.0779	23.8454	24.5447	24.7479	24.5875	24.6537	24.5905	24.4967	25.3733	0.814262	-0.764411	0.895976	-0.664191	0.216989	-0.157152
Rv2575	Possible conserved membrane glycine rich protein	Unknown	P9WL85	Rv2575	Mb2605	cell wall and cell processes	30.806	5	33.4	0	84.281	25.6212	25.6309	25.9867	25.9529	24.4103	24.7218	26.2814	23.5065	24.4721	26.5635	26.1633	25.8771	0.913505	-0.455043	1.07847	-1.173	0.799112	-1.44794
ppiB	Probable peptidyl-prolyl cis-trans isomerase B PpiB (cyclophilin) (PPIase) (rotamase) (peptidylprolyl isomerase)	PPIases accelerate the folding of proteins [catalytic activity: cis-trans isomerization of proline imidic peptide bonds inoligopeptides].	P9WHW1	Rv2582	Mb2613	information pathways	32.371	10	46.1	0	77.362	26.7403	26.1489	26.7086	26.4802	23.82	26.6148	26.9809	26.6748	26.9919	24.0065	26.3974	27.0799	0.301029	0.704689	0.0499714	-0.189584	0.490003	1.05461
lppV	Probable conserved lipoprotein LppV	Unknown	P71655	Rv2796c	Mb2819c	cell wall and cell processes	20.197	10	61.5	0	149.99	23.5874	22.8366	24.5198	24.4151	23.6028	23.6353	23.7577	23.1867	22.2849	25.1515	22.7775	23.2514	0.0304054	-0.0788943	0.0714566	0.157602	0.31584	-0.650398
Rv0200	Possible conserved transmembrane protein	Unknown	O53651	Rv0200	Mb0206	cell wall and cell processes	24.029	11	59	0	147.56	23.5603	24.053	24.6272	24.104	24.6252	24.9464	24.1025	24.8361	24.8463	23.8509	23.8481	21.8579	0.539448	0.894513	0.905087	1.37288	0.930308	1.4093
Rv2588c	Probable conserved membrane protein secretion factor YajC	Thought to be involved in secretion apparatus.	P9WL75	Rv2588c	Mb2619c	cell wall and cell processes	12.966	9	69.6	0	323.31	26.6264	27.1526	25.5793	23.7094	27.1119	26.8508	25.9904	27.5101	26.1454	26.7918	26.9096	27.29	0.487359	-0.544365	0.428565	-1.10647	0.371369	-0.448487
Rv0205	Probable conserved transmembrane protein	Unknown	P9WFM5	Rv0205	Mb0211	cell wall and cell processes	38.038	8	13.9	0	59.38	23.2392	23.7566	23.7893	24.7725	23.9871	24.7534	23.3269	22.3147	23.1088	25.8995	24.246	24.6769	1.20181	-1.34574	0.320264	-0.436448	1.5928	-2.02398
lipW	Possible esterase LipW	Function unknown; lipolytic enzyme probably involved in cellular metabolism.	P96399	Rv0217c	Mb0223c	intermediary metabolism and respiration	32.216	8	37.1	0	74.484	23.2452	24.8023	24.7468	24.9786	23.5321	25.1101	24.1683	23.6745	23.6806	23.0723	23.9267	24.1849	0.367417	0.536832	0.598792	0.812301	0.10946	0.113173
Rv2613c	Conserved protein	Function unknown; but could be involved in lipid metabolism.	P9WMK9	Rv2613c	Mb2645c	lipid metabolism	21.869	13	88.2	0	80.987	27.1397	26.906	26.8676	27.2573	24.8165	27.0598	27.2718	27.6956	27.0104	26.5172	26.9938	27.2901	0.0535296	0.0373942	0.273723	-0.555813	0.581135	0.392253
Rv2617c	Probable transmembrane protein	Unknown	I6XER9	Rv2617c	Mb2650c	cell wall and cell processes	15.584	4	35.6	0	28.084	22.8252	24.3897	24.2648	23.9468	24.5142	23.384	22.7778	24.8383	24.0812	23.6549	24.3062	24.4873	0.224478	-0.322886	0.186079	-0.201128	0.142205	-0.250386
Rv0235c	Probable conserved transmembrane protein	Unknown	P96418	Rv0235c	Mb0240c	cell wall and cell processes	54.837	6	17.4	0	7.2402	22.8188	23.3557	21.9018	23.799	24.3427	23.6708	24.525	23.1529	24.3743	23.8065	22.312	24.1809	0.448102	-0.741044	0.34423	0.504377	0.336209	0.584279
Rv2622	Possible methyltransferase (methylase)	Causes methylation	I6XES4	Rv2622	Mb2655	intermediary metabolism and respiration	29.542	7	37	0	9.7336	25.5025	22.643	25.3594	22.6718	23.6119	25.9109	25.8063	25.5621	25.3385	25.5446	25.7791	26.0094	0.608893	-1.27607	0.81634	-1.71282	0.475589	-0.208743
echA16	Probable enoyl-CoA hydratase EchA16 (enoyl hydrase) (unsaturated acyl-CoA hydratase) (crotonase)	Could possibly oxidize fatty acids using specific components [catalytic activity: (3S)-3-hydroxyacyl-CoA = trans-2(or 3)-enoyl-CoA + H(2)O].	I6YEH6	Rv2831	Mb2855	lipid metabolism	26.63	14	54.2	0	323.31	29.9982	30.0779	29.9852	30.0288	29.9399	30.1305	29.8896	29.9137	30.0647	29.8043	29.8498	29.9313	1.55111	0.158646	1.21139	0.171269	0.642654	0.0942313
fadE5	Probable acyl-CoA dehydrogenase FadE5	Function unknown, but involved in lipid degradation.	A0A0H3M7K8	Rv0244c	Mb0250c	lipid metabolism	66.014	1	4.6	0	323.31	31.9683	31.9889	31.9599	32.3464	30.9313	31.9845	31.9052	32.0448	31.9096	31.181	32.0622	31.7995	0.485127	0.291442	0.0504032	0.0731386	0.440625	0.272282
Rv2632c	Conserved protein	Function unknown	P9WL61	Rv2632c	Mb2665c	conserved hypotheticals	10.083	3	62.4	0	178.38	26.7808	24.0608	23.1249	23.993	24.6055	26.4913	27.0044	23.5959	24.0408	22.1668	24.5193	27.0891	0.0117248	0.0637722	0.0976125	0.438218	0.0560231	0.288641
Rv0249c	Probable succinate dehydrogenase [membrane anchor subunit] (succinic dehydrogenase)	Could be involved in interconversion of fumarate and succinate (aerobic respiration). This hydrophobic component may be required to anchor the catalytic components of the succinate dehydrogenase complex to the cytoplasmic membrane.	O53671	Rv0249c	Mb0255c	intermediary metabolism and respiration	31.077	5	22.7	0	26.78	26.9207	26.793	26.1325	26.0348	24.0871	26.8528	26.6022	26.2232	26.5812	26.4286	27.2072	27.1541	0.376756	-0.314581	0.672914	-1.27174	0.758233	-0.461154
pks12	Polyketide synthase Pks12	Involved in biosynthesis of mannosyl-beta-1-phosphomycoketide (MPM)	I6XD69	Rv2048c	Mb2074c	lipid metabolism	431.54	47	25.5	0	263.66	27.2059	25.1761	26.0213	23.8114	23.7373	28.0032	27.8062	25.4516	27.1888	22.8749	28.509	28.1461	0.0685622	-0.375552	0.225088	-1.32603	0.053934	0.305541
Rv2844	Conserved alanine rich protein	Function unknown	I6Y1V1	Rv2844	Mb2869	conserved hypotheticals	16.94	7	64.2	0	61.095	23.7859	23.7909	24.4372	23.549	24.4296	24.3345	24.6087	23.6388	24.9157	23.9038	23.1851	23.465	0.742126	0.486658	0.774781	0.586374	0.928109	0.869725
Rv0265c	Probable periplasmic iron-transport lipoprotein	Thought to be involved in iron transport across the membrane (import).	L7N6B2	Rv0265c	Mb0271c	cell wall and cell processes	35.284	11	38.8	0	245.56	24.1447	23.2614	24.0351	24.261	23.6261	23.5875	23.0153	23.861	22.8206	23.3612	23.4437	24.9545	0.0626969	-0.106066	0.0584595	-0.0949402	0.492607	-0.687513
Rv2061c	Conserved protein	Unknown	O86340	Rv2061c	Mb2087c	conserved hypotheticals	14.814	13	76.9	0	323.31	25.0025	24.9864	23.5158	23.8217	23.9879	26.431	25.2813	25.6764	25.5681	26.3484	24.3364	25.7987	0.56815	-0.992942	0.292275	-0.747621	0.0075765	0.0141106
clpC2	Possible ATP-dependent protease ATP-binding subunit ClpC2	Function unknown; possibly hydrolyzes peptides and/or proteins in presence of ATP.	P9WPC7	Rv2667	Mb2686	intermediary metabolism and respiration	26.627	10	44	0	146.11	22.5163	23.0154	24.2277	23.5562	24.3752	23.5942	22.6519	23.7897	22.7991	24.4754	23.9105	23.325	0.463138	-0.650525	0.0497432	-0.0617485	0.778105	-0.823406
fadD2	Probable fatty-acid-CoA ligase FadD2 (fatty-acid-CoA synthetase) (fatty-acid-CoA synthase)	Function unknown, but involved in lipid degradation.	P95227	Rv0270	Mb0276	lipid metabolism	59.906	38	74.8	0	323.31	28.6972	27.9867	27.76	28.5005	27.4864	28.7844	28.4719	27.9101	28.5917	27.7826	28.6765	28.8171	0.256742	-0.277445	0.12033	-0.168292	0.0931722	-0.100814
Rv2859c	Possible amidotransferase	Function unknown; probably involved in cellular metabolism.	O33341	Rv2859c	Mb2884c	intermediary metabolism and respiration	32.441	9	41.9	0	55.369	27.0482	27.2355	26.922	26.9675	26.1439	26.9364	27.4108	26.9821	27.0049	26.5709	27.1025	27.1331	0.259824	0.133066	0.318252	-0.252895	0.35747	0.197064
Rv2672	Possible secreted protease	Function unknown; possibly hydrolyzes peptides and/or proteins.	P71969	Rv2672	Mb2691	intermediary metabolism and respiration	54.015	21	56.8	0	323.31	22.6313	24.1617	23.8627	23.8608	24.1633	24.864	22.1699	23.1879	22.5945	23.5192	23.6059	25.8447	0.359789	-0.771387	0.0110004	-0.0272541	0.95921	-1.67254
hemY	Probable protoporphyrinogen oxidase HemY (protoporphyrinogen-IX oxidase) (protoporphyrinogenase) (PPO)	Involved in heme and porphyrin biosynthesis (at the penultimate step). Catalyzes the 6-electron oxidation of protoporphyrinogen IX to form protoporphyrin IX [catalytic activity: protoporphyrinogen-IX + O(2) = protoporphyrin-IX + H(2)O(2)].	P9WMP1	Rv2677c	Mb2696c	intermediary metabolism and respiration	46.846	16	64.4	0	165.09	26.8819	27.2067	26.7	26.0584	26.5905	26.7093	27.7221	26.7674	27.3306	27.4693	26.5933	27.3962	0.283835	-0.223436	0.950831	-0.700257	0.110464	0.120367
eccC3	ESX conserved component EccC3. ESX-3 type VII secretion system protein. Possible membrane protein.	Unknown	A0A0H3M7P2	Rv0284	Mb0292	Cell wall and cell processes	145.2	1	1.5	0	162.91	23.2856	22.7654	23.3095	25.4143	24.0988	23.7146	23.6004	23.9631	23.8428	25.3925	23.3577	25.356	1.06932	-1.58192	0.126753	-0.292819	0.59065	-0.899973
Rv0315	Possible beta-1,3-glucanase precursor	Possibly hydrolyzes specific sugar (hydrolyzation of glycosidic bond) and could be involved in exopolysaccharide biosynthesis/degradation. Could also have a LYTIC activity against cell WALLS.	O07242	Rv0315	Mb0323	intermediary metabolism and respiration	32.186	9	29.9	0	85.687	29.9443	29.9422	30.1919	29.9877	29.0493	29.6304	29.9628	29.9235	30.1055	30.5585	29.801	30.1188	0.221417	-0.133252	0.79494	-0.603622	0.289387	-0.162142
Rv2091c	Probable membrane protein	Unknown	P9WLJ5	Rv2091c	Mb2118c	cell wall and cell processes	26.019	11	23.4	0	323.31	23.3167	23.1035	23.4173	23.5319	25.6706	25.5001	24.2289	24.6704	23.8491	25.6156	23.8615	23.7929	0.883022	-1.14415	0.202588	0.477537	0.096944	-0.173845
Rv2700	Possible conserved secreted alanine rich protein	Unknown	I6Y1I5	Rv2700	Mb2719	cell wall and cell processes	22.659	12	81.9	0	73.924	24.518	23.2868	23.2409	22.6021	24.2275	24.7285	23.8874	23.5392	25.1269	23.2035	24.5053	23.2856	0.00948065	0.0170873	0.0869048	0.187905	0.335169	0.519675
Rv0328	Possible transcriptional regulatory protein (possibly TetR/AcrR-family)	Possibly involved in a transcriptional mechanism.	O07252	Rv0328	Mb0335	regulatory proteins	21.411	5	26	0	17.415	23.0489	23.702	23.0623	25.3373	23.0398	23.0989	24.1369	22.6868	23.0477	24.4945	24.1763	22.479	0.269502	-0.44551	0.0375784	0.108741	0.217494	-0.426119
Rv2908c	Conserved hypothetical protein	Function unknown	P9WFM7	Rv2908c	Mb2932c	conserved hypotheticals	8.5206	6	66.2	0	41.692	27.4581	27.5921	27.7574	27.722	28.3896	26.8367	27.2471	27.4006	27.7208	28.3722	26.5983	27.6932	0.0308109	0.0479279	0.0474182	0.0948582	0.0639759	-0.0984427
Rv0333	Unknown protein	Unknown	O33273	Rv0333	Mb0340	conserved hypotheticals	13.074	6	55.6	0	182.47	28.2621	28.4625	28.3393	28.3413	29.0793	28.0563	28.0355	27.9263	28.2778	28.6367	27.4959	28.1826	0.301254	0.249554	0.358155	0.387273	0.0242399	-0.0251789
Rv2915c	Conserved protein	Function unknown	P9WL23	Rv2915c	Mb2939c	conserved hypotheticals	39.769	10	33	0	59.66	24.8246	24.7308	25.1592	25.074	24.962	24.6705	25.0226	25.1164	25.7094	25.3468	24.2538	25.1504	0.0110877	-0.012125	0.0137409	-0.0148411	0.385727	0.365794
sigB	RNA polymerase sigma factor SigB	The sigma factor is an initiation factor that promotes attachment of the RNA polymerase to specific initiation sites and then is released. May control the regulons of stationary phase and general stress resistance. Seems to be regulated by sigh (Rv3223c product) and SIGE (Rv1221 product). Seems to regulate KATG|Rv1908c and the heat-shock response.	P9WGI5	Rv2710	Mb2729	information pathways	36.343	5	22.6	0	15.465	23.1429	23.192	23.2057	25.6494	24.5857	24.168	24.4172	22.8051	23.9836	24.51	22.5062	24.6554	0.439223	-0.710336	0.481488	0.910541	0.0639553	-0.155233
lpqJ	Probable lipoprotein LpqJ	Unknown	O06295	Rv0344c	Mb0351c	cell wall and cell processes	19.309	4	25.3	0	139.68	23.4456	23.8473	23.274	22.9922	22.6393	24.487	23.251	23.2958	24.197	24.2077	23.6943	23.6985	0.64689	-0.344547	0.346262	-0.493996	0.334575	-0.285597
Rv2716	Conserved protein	Function unknown	P9WL43	Rv2716	Mb2735	conserved hypotheticals	24.574	10	73.2	0	152.59	27.6997	27.5076	27.6638	27.8753	28.2339	27.6857	27.5301	27.8025	27.6804	28.1133	27.3753	27.5073	0.061499	-0.0415948	0.405852	0.266331	0.00776695	0.0056839
Rv2114	Conserved protein	Unknown	O33249	Rv2114	Mb2138	conserved hypotheticals	22.774	9	61.4	0	51.919	26.9209	26.8193	26.9444	26.9317	27.2479	26.9088	27.1653	26.9534	27.1104	27.6965	26.5197	26.9	0.154152	-0.143854	0.00837212	-0.009257	0.0361403	0.0376167
Rv2926c	Conserved protein	Function unknown	P9WL17	Rv2926c	Mb2951c	conserved hypotheticals	22.41	2	14	0	11.976	23.634	23.4633	22.8292	23.2545	24.0728	23.6632	24.8659	24.1478	23.3428	24.3836	24.7288	22.1317	0.198778	-0.439202	0.0336772	-0.0845261	0.149243	0.370778
Rv2120c	Probable conserved integral membrane protein	Unknown	O33255	Rv2120c	Mb2144c	cell wall and cell processes	16.403	3	23.8	0	76.621	24.3687	23.6527	25.4743	23.9412	24.3358	24.4167	22.866	24.733	24.0293	24.3943	24.3776	23.0623	0.33081	0.553836	0.243224	0.286496	0.0330608	-0.0686226
fba	Probable fructose-bisphosphate aldolase Fba	Involved in glycolysis (at the sixth step) [catalytic activity: D-fructose 1,6-bisphosphate = glycerone phosphate + D-glyceraldehyde 3-phosphate].	P9WQA3	Rv0363c	Mb0370c	intermediary metabolism and respiration	36.544	25	82.3	0	323.31	32.9021	33.0874	33.019	33.0046	33.4156	32.73	32.8073	32.8281	32.8393	33.3924	32.5509	32.9554	0.0504311	0.0365499	0.0953844	0.0838292	0.227574	-0.141375
ppsA	Phenolpthiocerol synthesis type-I polyketide synthase PpsA	Involved in phenolpthiocerol and phthiocerol dimycocerosate (dim) biosynthesis: extension of C18 with malony CoA (partial reduction).	A0A0H3M7U0	Rv2931	Mb2956	lipid metabolism	198.85	2	2.5	0	323.31	27.2454	25.2398	26.2191	25.7912	24.7776	27.4115	27.7475	26.4584	27.4596	25.6498	27.8422	28.081	0.422053	-0.956275	0.477074	-1.1976	0.0117336	0.0308119
Rv2731	Conserved alanine and arginine rich protein	Function unknown	I6XF60	Rv2731	Mb2750	conserved hypotheticals	49.795	25	63.6	0	135.17	24.9441	24.7654	24.9626	25.1073	25.3632	25.3715	25.4977	25.1327	25.1618	25.7232	24.8342	25.0125	0.464153	-0.29927	0.115634	0.090711	0.0891074	0.0740986
ansP1	L-asparagine permease AnsP1	Involved in L-asparagine transport.	A0A0H3M7U4	Rv2127	Mb2151	Cell wall and cell processes	52.534	1	2.5	0	50.738	22.0845	23.912	22.443	24.3024	22.9648	24.2555	25.3673	22.6927	21.7831	24.3429	23.2395	24.2998	0.796762	-1.14756	0.074095	-0.119822	0.235525	-0.679702
drrA	Daunorubicin-dim-transport ATP-binding protein ABC transporter DrrA	Probably involved in active transport of antibiotic and phthiocerol dimycocerosate (dim) across the membrane (export). DRRA, DRRB|Rv2936|MTCY19H9.05 and DRRC|Rv2938|MTCY19H9.06 may act jointly to confer daunorubicin and doxorubicin resistance by an export mechanism. Responsible for energy coupling to the transport system.	P9WQL9	Rv2936	Mb2961	cell wall and cell processes	35.818	6	26	0	25.81	24.6369	24.0274	22.8127	23.8577	24.074	22.9048	23.9774	22.7269	24.6485	25.1421	24.8057	24.0333	0.593525	-0.834702	1.011	-1.04818	0.601992	-0.876092
mmpL7	Conserved transmembrane transport protein MmpL7	Involved in translocation of phthiocerol dimycocerosate (dim) in the cell wall.	P9WJU7	Rv2942	Mb2967	cell wall and cell processes	95.121	21	33.6	0	323.31	24.5138	22.9393	24.0506	26.0465	24.0278	24.8048	23.7263	24.5876	23.5487	24.4809	22.6145	24.4755	0.00949945	-0.0224272	0.573805	1.10269	0.0476208	0.0972048
TB18.6	Conserved protein TB18.6	Unknown	P9WFN1	Rv2140c	Mb2164c	conserved hypotheticals	18.634	13	99.4	0	323.31	31.8214	31.8507	31.7342	31.816	32.354	31.4888	31.757	32.0049	31.6189	32.2792	31.5327	31.7692	0.0932378	-0.058267	0.025958	0.0259361	0.0964861	-0.0667375
fadD22	P-hydroxybenzoyl-AMP ligase FadD22	Involved in biosynthesis of phenolic glycolipids (PGLs)	P9WQ61	Rv2948c	Mb2972c	lipid metabolism	75.197	14	32.2	0	189.75	26.3767	24.3416	25.9757	22.7817	22.9433	26.9077	26.4899	26.5751	26.6964	22.9624	26.528	26.8427	0.0290762	0.120317	0.268916	-1.23348	0.386311	1.14281
Rv2750	Probable dehydrogenase	Function unknown; possibly involved in cellular metabolism.	P9WGS5	Rv2750	Mb2771	intermediary metabolism and respiration	28.223	5	20.2	0	49.145	25.4502	25.4034	25.2142	25.4354	23.7749	25.4069	25.4407	25.6622	25.7745	25.5376	25.2347	25.6736	0.352958	-0.126031	0.46781	-0.609559	0.370193	0.143826
wag31	Diviva family protein Wag31	Unknown	P9WMU1	Rv2145c	Mb2169c	cell wall and cell processes	28.277	23	78.8	0	323.31	31.0567	31.6618	32.0605	31.6678	32.5349	31.1021	31.3881	32.2203	31.9553	32.0113	30.84	31.2449	0.193747	0.227592	0.303588	0.402858	0.507212	0.489151
ftsQ	Possible cell division protein FtsQ	This protein may be involved in septum formation.	P9WNA1	Rv2151c	Mb2175c	cell wall and cell processes	33.933	7	37.9	0	57.162	22.3037	25.276	23.6341	23.4378	22.4382	23.5512	23.8334	24.104	24.0234	23.4665	23.7983	23.5778	0.0490427	0.123695	0.572262	-0.471813	1.3783	0.372744
clpB	Probable endopeptidase ATP binding protein (chain B) ClpB (ClpB protein) (heat shock protein F84.1)	Thought to be an ATPase subunit of an intracellular ATP-dependent protease. Seems to be regulated positively by sigh (Rv3223c product) and negatively by HSPR (Rv0353 product).	P9WPD1	Rv0384c	Mb0391c	virulence, detoxification, adaptation	92.567	75	82.3	0	323.31	31.1004	30.3451	30.2667	30.4607	30.6557	30.996	30.1397	29.9528	30.3237	30.6006	30.4152	30.7321	0.0139939	-0.0118942	0.267812	0.121488	1.46032	-0.443899
Rv0390	Conserved protein	Function unknown	P95198	Rv0390	Mb0396	conserved hypotheticals	15.392	6	72.9	0	113.87	27.6505	27.9799	27.6867	27.5525	28.2467	27.5912	27.3493	27.7877	27.3789	27.8812	27.2863	27.531	0.438422	0.206205	0.335411	0.230654	0.0977101	-0.0608819
hup	DNA-binding protein HU homolog HupB (histone-like protein) (HLP) (21-kDa laminin-2-binding protein)	This protein belongs to the histone like family of prokaryotic DNA-binding proteins which are capable of wrapping DNA to stabilize it, and prevent its denaturation under extreme environmental conditions.	P9WMK7	Rv2986c	Mb3010c	information pathways	21.292	7	35.1	0	142.37	26.9626	25.7898	25.2935	24.8499	28.4058	27.4725	26.7227	27.0105	26.5591	27.4507	23.7665	26.0569	0.0765251	0.257222	0.310848	1.15134	0.392419	1.00607
Rv2179c	Conserved hypothetical protein	Unknown	P9WJ73	Rv2179c	Mb2201c	conserved hypotheticals	19.52	4	32.7	0	36.763	24.1269	24.2109	24.6713	24.8653	24.8101	24.2897	24.002	24.1155	24.0723	24.1139	24.0103	24.2975	0.445545	0.195803	1.19911	0.514507	0.35644	-0.0772794
fadE7	Acyl-CoA dehydrogenase FadE7	Function unknown, but involved in lipid degradation.	P95208	Rv0400c	Mb0406c	lipid metabolism	42.297	20	69.1	0	89.058	28.073	27.7222	27.8922	28.1337	27.655	28.0422	28.1275	27.8297	28.0346	28.5423	28.4094	28.2319	1.67456	-0.498732	1.23078	-0.450904	1.46543	-0.39729
lppY	Probable conserved lipoprotein LppY	Unknown	O53246	Rv2999	Mb3024	cell wall and cell processes	33.931	16	79.8	0	323.31	24.2283	24.1663	23.3984	24.5962	23.2961	23.9782	23.9224	23.963	23.3158	23.5569	23.5208	23.3328	0.769509	0.46085	0.566334	0.486689	0.52577	0.263556
Rv3005c	Conserved hypothetical protein	Function unknown	I6YAV3	Rv3005c	Mb3030c	conserved hypotheticals	28.859	6	31.5	0	37.671	23.9375	24.1913	23.3793	23.1904	25.5519	23.2781	23.0791	24.8616	23.3651	24.2224	23.5841	22.942	0.224556	0.253225	0.189336	0.424004	0.100317	0.185813
pta	Probable phosphate acetyltransferase Pta (phosphotransacetylase)	Involved at the last step (of two) in the conversion of acetate to acetyl-CoA [catalytic activity: acetyl-CoA + phosphate = CoA + acetyl phosphate].	P9WHP1	Rv0408	Mb0416	intermediary metabolism and respiration	72.948	17	36.1	0	136.29	26.8546	26.2342	25.7797	26.5697	23.3515	27.643	27.2374	26.3492	26.8695	26.1852	27.3339	26.882	0.486701	-0.510853	0.286562	-0.945635	0.0143733	0.0183207
qcrC	Probable ubiquinol-cytochrome C reductase QcrC (cytochrome C subunit)	Respiration	P9WP35	Rv2194	Mb2217	intermediary metabolism and respiration	29.138	10	37.5	0	86.774	23.5089	25.5988	25.2449	25.3122	24.798	26.034	25.0747	25.6192	25.4967	26.0761	24.3293	25.8433	0.303748	-0.632025	0.0176931	-0.0348593	0.0111725	-0.0193717
Rv2772c	Probable conserved transmembrane protein	Unknown	I6YA75	Rv2772c	Mb2794c	cell wall and cell processes	17.326	2	14.6	0	40.877	24.5071	23.1647	24.0859	24.3153	23.5218	23.639	22.9773	24.5597	23.3609	23.8659	23.303	23.8695	0.211952	0.239773	0.178314	0.145862	0.0307796	-0.046826
iscS	Cysteine desulfurase IscS (NIFS protein homolog) (nitrogenase metalloclusters biosynthesis protein NIFS)	Catalyzes the removal of elemental sulfur from cysteine to produce alanine.	P9WQ71	Rv3025c	Mb3051c	intermediary metabolism and respiration	40.947	9	39.2	0	86.962	26.9427	27.0119	27.0555	27.077	26.9077	26.4371	26.6959	26.6656	26.851	27.032	26.3413	26.4912	0.834151	0.381846	0.260658	0.185774	0.206187	0.116001
Rv2778c	Conserved protein	Function unknown	I6Y1P2	Rv2778c	Mb2800c	conserved hypotheticals	17.268	6	38.5	0	18.775	25.0987	24.8299	24.7462	24.191	25.5253	25.2777	24.7139	24.6814	24.4917	24.676	25.4583	25.2339	0.379586	-0.231091	0.0945611	-0.124708	0.952254	-0.493741
adhC	Probable NADP-dependent alcohol dehydrogenase AdhC	Generates aldehyde or ketone from alcohol [catalytic activity: alcohol + NADP(+) = aldehyde or ketone + NADPH].	P9WQC5	Rv3045	Mb3071	intermediary metabolism and respiration	37.075	19	65	0	323.31	32.552	32.6658	32.6356	32.7924	33.2338	32.6353	32.7633	32.834	32.6647	33.0912	32.6945	32.5049	0.342625	-0.145721	0.190247	0.123664	0.0176211	-0.0095253
Rv3050c	Probable transcriptional regulatory protein (probably AsnC-family)	Involved in transcriptional mechanism	I6XG13	Rv3050c	Mb3076c	regulatory proteins	27.618	9	39.4	0	47.806	25.3668	25.3043	25.7806	25.3847	25.8902	25.7309	26.1128	24.1274	25.9245	25.5546	25.4825	26.1056	0.393584	-0.230326	0.0642661	-0.0456142	0.188082	-0.325998
Rv0426c	Possible transmembrane protein	Unknown	P96272	Rv0426c	Mb0434c	cell wall and cell processes	13.93	3	37.4	0	4.388	23.4202	23.8643	23.9649	23.7677	24.6563	24.2373	23.5288	23.5392	23.4807	23.6022	23.2259	22.3744	0.787409	0.682271	1.21809	1.15291	0.545561	0.44871
sodC	Periplasmic superoxide dismutase [Cu-Zn] SodC	Destroys radicals which are normally produced within the cells and are toxic to biological systems [catalytic activity: 2 superoxide + 2 H+ = O2 + H2O2].	P9WGE9	Rv0432	Mb0440	virulence, detoxification, adaptation	23.844	9	63.3	0	306.2	22.0657	25.2145	24.945	25.1249	26.8498	27.222	23.5916	23.0678	22.9407	27.3223	22.6691	25.7247	0.275307	-1.16363	0.314091	1.1602	0.67056	-2.03869
Rv2204c	Conserved protein	Unknown	P9WMN5	Rv2204c	Mb2227c	conserved hypotheticals	12.544	8	69.5	0	274.19	29.8966	30.1381	29.5138	29.7864	29.8969	29.4081	29.4876	29.8677	29.4531	29.7209	29.2105	29.7367	0.512931	0.293439	0.245097	0.141113	0.0753914	0.0467567
Rv0439c	Probable dehydrogenase/reductase	Function unknown; possibly involved in cellular metabolism.	O53726	Rv0439c	Mb0447c	intermediary metabolism and respiration	33.65	12	65.9	0	209.03	25.4019	25.469	25.7366	26.019	24.1427	26.5889	26.491	25.0452	25.9414	23.5864	23.7268	26.9005	0.297954	0.79795	0.256627	0.845657	0.395945	1.08794
csm3	Conserved hypothetical protein	Function unknown	P9WJF9	Rv2821c	Mb2845c	conserved hypotheticals	25.773	8	36	0	21.616	26.064	26.2915	26.1961	25.9027	24.6652	26.0146	26.2069	26.2291	26.2216	26.3236	26.2616	26.3361	0.816811	-0.123231	0.835255	-0.779624	1.67027	-0.0879084
Rv2219	Probable conserved transmembrane protein	Unknown	P9WLI1	Rv2219	Mb2242	cell wall and cell processes	26.863	6	27.6	0	27.428	23.0422	22.2529	23.753	24.8642	24.2932	25.1874	23.4977	24.666	25.4169	24.0726	24.9877	23.707	1.00842	-1.23973	0.496828	0.525852	0.149461	0.271129
Rv0461	Probable transmembrane protein	Unknown	I6X961	Rv0461	Mb0470	cell wall and cell processes	18.621	5	36.2	0	40.432	23.1067	23.2931	23.9335	24.3678	25.0156	23.4319	24.7164	24.3313	24.0127	24.0308	23.8258	24.0555	0.944147	-0.526262	0.257306	0.301071	0.820335	0.38274
Rv2843	Probable conserved transmembrane alanine rich protein	Unknown	I6YAE2	Rv2843	Mb2868	cell wall and cell processes	17.767	5	34.3	0	63.471	23.8167	24.3605	23.3135	22.6073	24.7736	24.2639	24.9741	24.2893	24.8532	23.8035	23.9268	23.1458	0.204084	0.204846	0.135522	0.256219	1.54846	1.08016
Rv2239c	Conserved hypothetical protein	Unknown	P9WLG9	Rv2239c	Mb2263c	conserved hypotheticals	16.963	3	52.5	0	44.795	27.6088	27.8326	27.7925	27.6611	28.2383	27.1907	27.5599	27.9546	27.668	27.8285	27.3104	27.4632	0.553869	0.210588	0.182427	0.162673	0.426803	0.193453
Rv0466	Conserved protein	Function unknown	O53751	Rv0466	Mb0475	conserved hypotheticals	30.185	11	71.6	0	89.803	29.0324	28.2624	28.3937	28.4603	25.4964	28.4961	28.1493	27.4337	28.1195	24.8576	28.1593	28.2162	0.583425	1.48512	0.0977415	0.406596	0.293894	0.823163
acpM	Meromycolate extension acyl carrier protein AcpM	Involved in fatty acid biosynthesis (mycolic acids synthesis); involved in meromycolate extension.	P9WQF3	Rv2244	Mb2268	lipid metabolism	12.524	11	80	0	323.31	33.6725	34.0823	33.891	34.1964	34.5602	33.6797	33.7364	33.8038	33.7639	34.0784	32.9816	33.991	0.206478	0.198289	0.458187	0.461735	0.0847886	0.0843404
mtr	NADPH-dependent mycothiol reductase Mtr	Involved in reduction of mycothiol.	P9WHH3	Rv2855	Mb2880	intermediary metabolism and respiration	49.945	18	53.2	0	255.06	29.0259	28.8313	28.9012	28.6659	29.317	29.1758	29.5734	29.3392	29.5637	29.9258	29.3545	29.1977	1.17972	-0.573191	0.6728	-0.439809	0.000823502	-0.000591278
aldC	Probable aldehyde dehydrogenase AldC	Oxidizes a wide variety of aldehydes [catalytic activity: aldehyde + NAD(+) + H(2)O = acid + NADH].	O33340	Rv2858c	Mb2883c	intermediary metabolism and respiration	48.258	24	59.6	0	323.31	29.2836	29.2874	29.3694	29.326	28.5935	29.3706	29.1554	29.4587	29.3927	29.6943	29.2521	29.1031	0.0708771	-0.0363884	0.339564	-0.253139	0.0238227	-0.0142473
ftsE	Putative cell division ATP-binding protein FtsE (septation component-transport ATP-binding protein ABC transporter)	Involved in growth. Thought to be involved in active transport of septation component across the membrane. Responsible for energy coupling to the transport system. Is coded in an operon essential for cell division.	O05779	Rv3102c	Mb3129c	cell wall and cell processes	25.596	12	59	0	60.94	25.3856	24.0918	25.4262	25.142	23.8126	25.6231	25.5151	24.2724	25.4483	25.4392	25.3981	25.9077	0.585692	-0.613796	0.567704	-0.722421	0.505502	-0.503069
Rv2258c	Possible transcriptional regulatory protein	Possibly involved in transcriptional regulation	O53532	Rv2258c	Mb2282c	regulatory proteins	37.513	15	59.8	0	323.31	30.5961	30.747	30.7054	30.6779	31.0019	30.2123	30.5132	30.5865	30.4447	31.1802	30.5735	30.6405	0.228902	-0.115264	0.217887	-0.167358	0.652478	-0.283267
agpS	Possible alkyldihydroxyacetonephosphate synthase AgpS (alkyl-DHAP synthase) (alkylglycerone-phosphate synthase)	Involved in ether lipid biosynthesis [catalytic activity: 1-acyl-glycerone 3-phosphate + a long-chain alcohol = 1-alkyl-glycerone 3-phosphate + a long-chain acid anion].	O05784	Rv3107c	Mb3134c	lipid metabolism	56.52	13	44.2	0	189.2	25.4278	25.7472	25.4266	25.3476	24.6515	25.3408	25.6007	25.5579	25.7893	25.1361	25.5539	25.5737	0.250642	0.112636	0.494882	-0.307934	0.646497	0.228065
lprQ	Probable conserved lipoprotein LprQ	Unknown	P9WKV3	Rv0483	Mb0493	cell wall and cell processes	47.89	11	41.5	0	100.51	24.7885	23.4745	23.8817	24.1741	23.6335	23.3739	25.6598	23.876	23.7823	25.2242	24.7552	24.4612	0.789513	-0.765285	1.54573	-1.08638	0.225001	-0.374177
Rv2913c	Possible D-amino acid aminohydrolase (D-amino acid hydrolase)	Hydrolyzes specific D-amino acid.	P9WJH9	Rv2913c	Mb2937c	intermediary metabolism and respiration	67.204	10	26.8	0	107.77	24.8192	23.457	23.7819	23.5753	24.7347	24.5114	23.564	24.3598	22.7391	23.6943	23.5901	24.5375	0.0533371	0.0787671	0.289751	0.333192	0.279626	-0.386316
glnB	Probable nitrogen regulatory protein P-II GlnB	In nitrogen-limiting conditions, when the ratio of GLN to 2-ketoglutarate decreases, P-II is uridylylated to P-II-UMP by GLND|Rv2918c. P-II-UMP allows the deadenylylation of glutamine synthetase (gs), thus activating the enzyme. Converserly, in nitrogen excess P-II is deuridylated and promotes the adenylation of gs. P-II indirectly controls the transcription of the gs gene (GLNA: four copies in t…	P9WN31	Rv2919c	Mb2943c	regulatory proteins	12.227	3	42	0	38.699	25.9662	25.9059	25.8296	26.2595	24.0958	24.486	24.0541	25.8414	23.4191	26.5773	23.6699	26.0833	0.195226	0.457087	0.167478	-0.496387	0.363526	-1.00529
fadB4	Probable NADPH quinone oxidoreductase FadB4 (NADPH:quinone reductase) (zeta-crystallin)	Involved in lipid degradation [catalytic activity: NADPH + quinone = NADP(+) + semiquinone].	P95185	Rv3141	Mb3165	lipid metabolism	33.852	15	76.5	0	140.34	28.4573	28.3894	28.6866	28.8502	25.2939	28.8858	28.7672	28.5399	28.8752	27.8436	28.4339	28.8573	0.162469	0.132837	0.223238	-0.701632	0.490587	0.349176
dhmA1	Probable haloalkane dehalogenase	Converts haloalkanes to corresponding alcohol and halides [catalytic activity: 1-haloalkane + H2O = a primary alcohol + halide].	P9WMS3	Rv2296	Mb2318	intermediary metabolism and respiration	33.357	24	81.7	0	323.31	28.5432	28.8354	29.0025	28.7019	28.6	29.2689	29.0368	28.599	29.0591	29.3161	28.7815	29.2209	0.667113	-0.312488	0.397099	-0.249217	0.394479	-0.207893
rnc	Probable ribonuclease III Rnc (RNase III)	Digests double-stranded RNA. Involved in the processing of ribosomal RNA precursors and of some mRNAs [catalytic activity: endonucleolytic cleavage to 5'-phosphomonoester].	P9WH03	Rv2925c	Mb2950c	information pathways	25.399	8	60	0	72.441	26.5464	26.3693	26.0729	26.3456	23.4494	26.4447	26.7005	25.9192	26.7789	23.4153	23.9185	26.5363	0.807543	1.70619	0.223758	0.789899	0.851375	1.84286
Rv2302	Conserved protein	Function unknown	P9WLD5	Rv2302	Mb2324	conserved hypotheticals	8.5904	5	82.5	0	139.42	26.6356	27.0217	26.8157	26.5774	27.347	26.2438	26.7728	26.6154	26.9252	26.4429	25.602	26.4135	1.06166	0.671531	0.596562	0.569933	1.00132	0.618354
nuoE	Probable NADH dehydrogenase I (chain E) NuoE (NADH-ubiquinone oxidoreductase chain E)	Involved in aerobic|anaerobic respiration [catalytic activity: NADH + ubiquinone = NAD(+) + ubiquinol].	P9WIV5	Rv3149	Mb3173	intermediary metabolism and respiration	27.197	11	55.6	0	215.03	29.5372	29.6739	29.7456	29.6986	30.3358	29.4167	29.6305	29.9238	29.8553	30.0065	29.5533	29.4857	0.0586071	-0.0295595	0.159954	0.135202	0.259976	0.121384
fadD26	Fatty-acid-AMP ligase FadD26 (fatty-acid-AMP synthetase) (fatty-acid-AMP synthase)	Involved in phthiocerol dimycocerosate (dim) biosynthesis, possibly by activating substrates for the PPS polyketides synthase.	P9WQ43	Rv2930	Mb2955	lipid metabolism	63.011	33	73.1	0	312.74	29.5574	29.3602	29.9435	28.4291	23.8206	29.904	30.4977	29.7496	29.8625	27.1805	29.9951	30.1513	0.201011	0.511368	0.345022	-1.72445	0.394593	0.927615
ppsE	Phenolpthiocerol synthesis type-I polyketide synthase PpsE	Involved in phenolpthiocerol and phthiocerol dimycocerosate (dim) biosynthesis: extension with malony CoA (partial reduction, decarboxylation).	P9WQE1	Rv2935	Mb2960	lipid metabolism	158.74	79	66.2	0	323.31	31.3472	31.1245	31.3657	30.3993	27.4874	31.3898	31.5091	31.2402	31.3343	29.0647	31.5718	31.6368	0.241928	0.521396	0.277815	-0.99893	0.286415	0.60346
cmaA2	Cyclopropane-fatty-acyl-phospholipid synthase 2 CmaA2 (cyclopropane fatty acid synthase) (CFA synthase) (cyclopropane mycolic acid synthase 2) (mycolic acid trans-cyclopropane synthetase)	Essential for the cyclopropanation function. Transfers a methylene group from S-adenosyl-L-methionine to the cis double bond of an unsaturated fatty acid chain resulting in the replacement of the double bond with a methylene bridge. Mycolic acids, which represent the major constituent of mycobacterial cell wall complex, act as substrates [catalytic activity: S-adenosyl-L-methionine + phospholipid…	P9WPB5	Rv0503c	Mb0515c	lipid metabolism	34.66	26	85.8	0	323.31	30.2049	29.9041	29.9178	29.4396	27.2124	30.0897	30.0413	29.8271	30.055	30.1116	29.9562	30.0271	0.0737516	-0.0226669	0.569711	-1.11772	0.264033	-0.0571524
nuoM	Probable NADH dehydrogenase I (chain M) NUOK (NADH-ubiquinone oxidoreductase chain M)	Involved in aerobic|anaerobic respiration [catalytic activity: NADH + ubiquinone = NAD(+) + ubiquinol].	P9WIW5	Rv3157	Mb3181	intermediary metabolism and respiration	59.22	8	21.2	0	52.079	25.1537	24.7061	23.8356	23.3711	24.549	23.0749	23.8424	23.3493	24.0196	23.6843	22.4531	23.1518	1.30763	1.46872	0.422342	0.568619	0.715978	0.640725
fadD28	Fatty-acid-AMP ligase FadD28 (fatty-acid-AMP synthetase) (fatty-acid-AMP synthase)	Involved in phthiocerol dimycocerosate (dim) biosynthesis. Thought to be involved in the release and transfer of mycoserosic acid from mas onto the DIOLS.	P9WQ59	Rv2941	Mb2966	lipid metabolism	62.668	21	47.8	0	323.31	31.8934	32.0541	32.2156	31.6868	29.9971	31.979	32.0744	32.1058	32.1176	30.319	32.178	31.9648	0.404195	0.567075	0.113306	-0.266265	0.448143	0.61203
Rv0508	Conserved hypothetical protein	Function unknown	P9WKS9	Rv0508	Mb0520	conserved hypotheticals	10.71	5	47.4	0	19.594	24.9588	22.4437	22.8485	24.7579	24.0314	23.8385	24.2665	23.3771	23.7736	23.6538	23.2753	24.5623	0.181282	-0.413478	0.329261	0.378788	0.0178457	-0.0247307
Rv3161c	Possible dioxygenase	Function unknown; involved in cellular metabolism.	O53311	Rv3161c	Mb3186c	intermediary metabolism and respiration	42.518	17	57.9	0	135.82	27.7646	27.545	27.0351	27.5919	28.1354	28.029	27.9237	27.6026	27.816	28.4929	27.9325	27.8592	1.03099	-0.646673	0.271146	-0.176136	0.640713	-0.314137
pks1	Probable polyketide synthase Pks1	Polyketide synthase possibly involved in lipid synthesis	P96285	Rv2946c	Mb2971c	lipid metabolism	218.3	52	37.6	0	323.31	28.6242	26.768	26.8915	25.621	24.6292	28.54	29.1606	28.3318	28.2806	26.6363	29.5043	29.2762	0.402901	-1.04442	0.67214	-2.20889	0.0419704	0.118718
Rv2955c	Conserved protein	Function unknown	P95137	Rv2955c	Mb2979c	conserved hypotheticals	35.95	13	54.5	0	279.3	23.98	23.5014	23.1095	23.271	23.1503	25.7752	24.2367	23.3015	23.7426	24.2396	23.239	26.0306	0.496916	-0.972795	0.136587	-0.437579	0.360007	-0.742774
purU	Probable formyltetrahydrofolate deformylase PurU (formyl-FH(4) hydrolase)	Involved in de novo purine biosynthesis [catalytic activity: 10-formyltetrahydrofolate + H(2)O = formate + tetrahydrofolate].	P9WHM3	Rv2964	Mb2988	intermediary metabolism and respiration	34.006	7	42.6	0	104.86	25.781	25.8381	23.8763	25.6926	26.3186	25.6745	26.3133	26.0604	26.3026	26.455	26.1073	24.1568	0.158901	-0.407939	0.162385	0.322178	0.380826	0.652407
Rv2327	Conserved protein	Function unknown	P71885	Rv2327	Mb2354	conserved hypotheticals	17.208	9	55.8	0	36.668	23.1969	22.9325	24.6885	23.6796	23.8666	23.7841	24.4227	24.7218	23.6462	24.6754	24.8472	25.3524	1.09035	-1.35241	2.30717	-1.1816	0.850431	-0.694778
Rv0538	Possible conserved membrane protein	Unknown	O06404	Rv0538	Mb0552	cell wall and cell processes	55.075	4	9.9	0	26.961	24.8488	23.5828	23.1037	23.5067	24.7207	22.8206	22.3245	24.2199	23.9711	23.7086	23.4483	24.6784	0.0537507	-0.100022	0.145578	-0.262441	0.247797	-0.439951
Rv0543c	Conserved protein	Function unknown	O06409	Rv0543c	Mb0557c	conserved hypotheticals	11.312	5	64	0	110.41	27.1112	27.0633	26.9607	27.2734	27.6191	27.2252	26.6744	26.7969	27.2353	26.9526	26.5177	27.2535	0.24894	0.137119	0.875795	0.464614	0.00690316	-0.00574366
menB	Naphthoate synthase MenB (dihydroxynaphthoic acid synthetase) (DHNA synthetase)	Involved in menaquinone biosynthesis. Convert O-succinylbenzoyl-CoA (OSB-CoA) to 1,4-dihydroxy-2-naphthoic acid (DHNA) [catalytic activity: O-succinylbenzoyl-CoA = 1,4-dihydroxy-2-naphthoate + CoA].	P9WNP5	Rv0548c	Mb0562c	intermediary metabolism and respiration	34.689	15	66.6	0	323.31	29.8316	29.9787	30.048	29.9156	30.3242	30.1216	29.9806	29.8634	30.1446	30.326	29.9263	30.0706	0.509474	-0.154867	0.0258456	0.0128072	0.320852	-0.111493
bpoC	Possible peroxidase BpoC (non-haem peroxidase)	Supposedly involved in detoxification reactions.	P9WNH1	Rv0554	Mb0569	virulence, detoxification, adaptation	28.381	8	56.5	0	61.041	26.284	25.4434	25.8657	25.8567	25.3882	27.1686	26.317	24.0751	26.4461	26.5228	26.3884	26.1227	0.825511	-0.480311	0.140279	-0.206784	0.397469	-0.731929
grcC1	Probable polyprenyl-diphosphate synthase GrcC1 (polyprenyl pyrophosphate synthetase)	Possibly supplies polyprenyl diphosphate.	O06428	Rv0562	Mb0577	intermediary metabolism and respiration	35.56	18	71.6	0	323.31	25.9027	24.0867	24.4964	23.8931	23.8271	26.226	22.8489	25.8595	23.3758	26.5643	25.3721	26.0593	0.835693	-1.16999	0.716471	-1.34983	0.929878	-1.9705
Rv3194c	Possible conserved secreted protein	Function unknown	O53340	Rv3194c	Mb3216c	cell wall and cell processes	35.472	14	44.4	0	177.13	25.5036	25.3709	25.6471	25.2114	23.0535	25.3611	25.0459	24.6118	25.4033	25.2453	25.1074	25.385	1.08672	0.261332	0.396848	-0.70388	0.392713	-0.225567
Rv0569	Conserved protein	Function unknown	P9WM83	Rv0569	Mb0584	conserved hypotheticals	9.5226	5	76.1	0	28.787	27.0296	26.8165	26.6484	26.495	27.2977	25.9014	26.428	26.5659	27.1836	26.1225	25.5948	26.5757	1.13476	0.733861	0.400158	0.467051	0.791359	0.62816
lipN	Probable lipase/esterase LipN	Function unknown; lipolytic enzyme involved in cellular metabolism.	P95125	Rv2970c	Mb2994c	intermediary metabolism and respiration	40.134	17	69.9	0	185.24	24.6114	23.4853	24.0049	23.3822	24.0374	27.1531	26.5686	23.3242	23.6604	24.144	26.2933	26.5968	0.916491	-1.64417	0.230386	-0.820459	0.378458	-1.16027
thiL	Probable thiamine-monophosphate kinase ThiL (thiamine-phosphate kinase)	Involved in thiamine biosynthesis [catalytic activity: ATP + thiamine phosphate = ADP + thiamine diphosphate].	P9WG71	Rv2977c	Mb3001c	intermediary metabolism and respiration	34.33	11	52.6	0	21.567	23.6871	23.4347	24.3635	23.5573	24.2111	23.2888	24.8729	24.8255	23.2326	24.5248	23.3153	23.5527	0.0222818	0.0308609	0.086202	-0.111856	0.321712	0.512739
moeZ	Probable molybdenum cofactor biosynthesis protein MoeB1 (MPT-synthase sulfurylase) (molybdopterin synthase sulphurylase)	Possibly involved in molybdopterin metabolism (synthesis)	P9WMN7	Rv3206c	Mb3231c	intermediary metabolism and respiration	42.173	11	40.6	0	19.071	26.4986	26.4294	26.0051	23.1757	23.7283	26.1217	26.0802	22.5825	23.1646	25.4441	25.9985	26.4263	0.475734	0.354723	0.785946	-1.6144	0.835025	-2.01392
Rv3210c	Conserved protein	Function unknown	O05856	Rv3210c	Mb3236c	conserved hypotheticals	25.121	7	47.6	0	125.8	25.6304	24.5079	24.0064	25.6738	24.6623	25.9484	25.543	25.0435	25.6108	25.2628	24.2701	26.2548	0.297246	-0.547672	0.0845686	0.165591	0.0802995	0.136549
Rv3231c	Conserved protein	Function unknown	O05876	Rv3231c	Mb3260c	conserved hypotheticals	17.797	6	46.2	0	8.8512	25.7695	23.2795	25.3079	24.097	24.5655	23.9436	23.8023	23.9825	25.418	25.8034	22.3759	25.4071	0.0676313	0.256833	0.107391	-0.326779	0.0361857	-0.12791
lpqO	Probable conserved lipoprotein LpqO	Unknown	I6X9E2	Rv0604	Mb0620	cell wall and cell processes	32.897	15	87	0	254.26	22.6944	24.8376	22.2759	25.2308	23.8966	23.0407	23.85	23.5967	24.6977	24.1205	24.2279	24.1129	0.484319	-0.884487	0.0527264	-0.0977764	0.114504	-0.105648
Rv2993c	Possible 2-hydroxyhepta-2,4-diene-1,7-dioate isomerase (HHDD isomerase)	Isomerizes HHDD (2-hydroxy-hept-2,4-diene-1,7-dioate) to OHED (2-oxo-hept-3-ene-1,7-dioate).	I6Y276	Rv2993c	Mb3017c	intermediary metabolism and respiration	25.341	9	57.7	0	84.663	28.3685	28.4017	28.3095	28.6495	28.7369	28.0941	28.0597	28.246	28.3214	28.8082	28.6636	28.3337	0.780073	-0.241927	0.166451	-0.108374	1.15083	-0.392839
dnaJ2	Probable chaperone protein DnaJ2	Acts as a co-chaperone. Stimulates, jointly with GRPE, the ATPase activity of DNAK|Rv0350.	P9WNV7	Rv2373c	Mb2394c	virulence, detoxification, adaptation	40.488	13	42.4	0	204.42	27.3844	25.3267	25.8864	24.0851	25.9503	27.0431	25.2548	24.7861	25.2554	26.535	26.7154	27.1321	0.392968	-0.595029	0.55343	-1.10137	2.70133	-1.69541
pfkA	Probable 6-phosphofructokinase PfkA (phosphohexokinase) (phosphofructokinase)	Involved in glycolysis; converts sugar-1-P to sugar-1,6-P [catalytic activity: ATP + D-fructose 6-phosphate = ADP + D-fructose 1,6-bisphosphate].	P9WID7	Rv3010c	Mb3035c	intermediary metabolism and respiration	36.88	20	62.1	0	185.71	29.353	29.7039	29.689	29.4545	29.8673	29.6039	29.5391	29.3129	29.3992	29.9489	29.0476	29.4554	0.126162	0.0980371	0.213579	0.157967	0.0884575	-0.0668933
manA	Probable mannose-6-phosphate isomerase ManA (phosphomannose isomerase) (phosphomannoisomerase) (PMI) (phosphohexoisomerase) (phosphohexomutase)	This enzyme converts D-mannose 6-phosphate to D-fructose 6-phosphate [catalytic activity: D-mannose 6-phosphate = D-fructose 6-phosphate].	O05898	Rv3255c	Mb3283c	intermediary metabolism and respiration	43.371	16	47.1	0	323.31	28.9609	28.9949	29.0625	28.9861	29.2936	28.9967	28.989	28.9239	28.9974	29.3769	28.9532	28.9292	0.209662	-0.0803305	0.0106047	0.00569089	0.324449	-0.116304
Rv0634c	Possible glyoxalase II (hydroxyacylglutathione hydrolase) (GLX II)	Thought to be involved in glyoxal pathway. Thiolesterase that catalyses the hydrolysis of S-D-lactoyl-glutathione to form glutathione and D-lactic acid [catalytic activity: (S)-(2-hydroxyacyl)glutathione + H2O = glutathione + a 2-hydroxy acid anion].	I6Y4A5	Rv0634c	Mb0651c	virulence, detoxification, adaptation	25.928	9	53.6	0	134.03	25.6155	23.7961	24.8448	24.8191	23.7737	24.229	26.1378	25.7946	23.9683	25.7252	23.4846	26.3154	0.156708	-0.422934	0.420326	-0.901114	0.0388619	0.125193
secE	Probable preprotein translocase SecE1	Essential for protein export.	P9WGN7	Rv0638	Mb0657	cell wall and cell processes	16.956	10	65.2	0	323.31	25.7815	22.9541	26.3983	26.0138	26.1399	26.0329	25.6535	24.8967	25.4467	25.9982	25.673	26.2217	0.357142	-0.919664	0.234424	0.0978889	1.0749	-0.63199
mmaA1	Methoxy mycolic acid synthase 1 MmaA1 (methyl mycolic acid synthase 1) (MMA1) (hydroxy mycolic acid synthase)	Involved in mycolic acids modification. Catalyzes unusual S-adenosyl-methionine-dependent transformation of a cis-olefin mycolic acid into a secondary alcohol. Catalyzes introduction of a hydroxyl group at the distal position on mycolic acid chains to produce the hydroxyl mycolate. Mycolic acids represent a major constituent of the mycobacterial cell wall complex. Methyl transfer results in forma…	P9WPB1	Rv0645c	Mb0664c	lipid metabolism	33.149	14	67.1	0	81.035	27.5444	27.1421	27.543	26.3753	23.9226	27.4615	27.7867	27.2014	27.6422	27.641	27.5471	27.5154	0.495818	-0.158023	0.719616	-1.64801	0.0462763	-0.0243537
Rv3267	Conserved protein (CPSA-related protein)	Function unknown	P96872	Rv3267	Mb3295	conserved hypotheticals	51.313	5	17.5	0	27.999	22.8343	23.6628	24.8887	25.3818	23.6892	23.5432	24.3879	23.8447	24.3384	23.6753	25.3609	24.7999	0.453764	-0.81679	0.204077	-0.407301	0.330787	-0.421687
etfB	Probable electron transfer flavoprotein (beta-subunit) FixA (beta-ETF) (electron transfer flavoprotein small subunit) (ETFSS)	The electron transfer flavoprotein serves as a specific electron acceptor for other dehydrogenases. It transfers the electrons to the main respiratory chain via ETF-ubiquinone oxidoreductase (ETF dehydrogenase).	P9WNG7	Rv3029c	Mb3055c	intermediary metabolism and respiration	28.08	27	76.7	0	323.31	32.7998	32.8752	32.7475	33.2138	33.0861	32.6984	32.7393	33.0485	32.7541	32.9531	32.9192	32.7672	0.457962	-0.0723178	0.293228	0.119621	0.100858	-0.0325165
cysT	Probable sulfate-transport integral membrane protein ABC transporter CysT	Involved in the active transport across the membrane of multiple sulfur-containing compounds, including sulfate and thiosulfate (import). Responsible for the translocation of the substrate across the membrane.	P71745	Rv2399c	Mb2421c	cell wall and cell processes	29.683	6	26.9	0	34.103	23.3851	23.2224	22.6166	24.309	23.2974	24.0422	23.3595	23.8168	23.3904	23.1262	24.0385	24.1109	0.802751	-0.683805	0.101985	0.124332	0.270728	-0.236278
Rv3033	Unknown protein	Unknown	I6YAY5	Rv3033	Mb3059	conserved hypotheticals	19.272	8	71.4	0	124.35	21.6078	22.6668	24.8217	23.8709	24.6976	24.1223	22.9169	23.9276	24.3829	24.1592	23.4724	23.3863	0.261446	-0.640591	0.739237	0.557591	0.0480889	0.0698096
lppR	Probable conserved lipoprotein LppR	Unknown	P71740	Rv2403c	Mb2426c	cell wall and cell processes	26.353	9	32.7	0	69.185	23.2779	23.7767	23.628	23.86	24.3597	23.4747	23.6039	22.6509	24.049	23.5053	23.4635	23.9784	0.148107	-0.0881856	0.337531	0.249074	0.184115	-0.214473
Rv2410c	Conserved protein	Function unknown	P71733	Rv2410c	Mb2433c	conserved hypotheticals	36.02	10	40.9	0	70.616	23.4881	23.3432	23.9791	22.813	23.1431	21.5067	23.6669	23.6581	23.2452	24.1502	23.5876	23.1349	0.0196695	-0.0207424	0.915882	-1.13662	0.112461	-0.100813
sseA	Probable thiosulfate sulfurtransferase SseA (rhodanese) (thiosulfate cyanide transsulfurase) (thiosulfate thiotransferase)	Possibly a sulfotransferase involved in the formation of thiosulfate [catalytic activity: thiosulfate + cyanide = sulfite + thiocyanate].	P9WHF7	Rv3283	Mb3311	intermediary metabolism and respiration	33.32	21	76.4	0	323.31	31.513	31.6433	31.622	31.7807	32.1491	31.6036	31.5992	31.6786	31.6099	31.9257	31.3041	31.4961	0.0313224	0.0174866	0.478857	0.26918	0.104836	0.0539589
fecB	Probable FEIII-dicitrate-binding periplasmic lipoprotein FecB	May be involved in active transport of FeIII-decitrate across the membrane (import).	O53291	Rv3044	Mb3070	cell wall and cell processes	36.91	17	66	0	323.31	24.1833	23.9613	23.9043	23.7067	23.2641	23.8947	24.0242	25.0101	23.4098	24.3244	24.2223	23.4394	0.0239433	0.0209223	0.482859	-0.373525	0.100882	0.152678
Rv2423	Hypothetical protein	Unknown	P71925	Rv2423	Mb2446	conserved hypotheticals	38.99	14	54.6	0	49.75	25.6589	25.5748	25.1926	24.2075	24.1471	25.827	25.2573	25.6388	25.847	24.2611	25.5564	25.4116	0.387189	0.399064	0.19548	-0.349163	0.495118	0.504662
Rv0688	Putative ferredoxin reductase	Ferredoxins are iron-sulfur proteins that transfer electrons in a wide variety of metabolic reactions.	P95034	Rv0688	Mb0707	intermediary metabolism and respiration	43.017	17	53.7	0	227.94	29.4033	29.0716	29.1221	29.2349	27.5768	29.4662	29.1718	28.8075	29.1833	28.3832	28.9087	29.4209	0.392673	0.294754	0.0765384	-0.144932	0.175504	0.149935
ahpC	Alkyl hydroperoxide reductase C protein AhpC (alkyl hydroperoxidase C)	Involved in oxidative stress response. LPDC|Rv0462, DLAT|Rv2215, AHPD|Rv2429, and AHPC|Rv2428 constitute an NADH-dependent peroxidase and peroxynitrite reductase that provides protection against oxidative stress.	P9WQB7	Rv2428	Mb2454	virulence, detoxification, adaptation	21.566	20	94.4	0	323.31	33.0816	32.7168	32.4523	33.0958	32.448	33.096	32.9335	32.6125	32.7162	32.7932	32.7584	33.1197	0.258623	-0.140148	0.0142223	-0.0105158	0.385341	-0.136342
punA	Probable purine nucleoside phosphorylase DeoD (inosine phosphorylase) (PNP)	Involved in purine nucleoside salvage. Cleavage of guanosine or inosine to respective BASES and sugar-1-phosphate molecules [catalytic activity: purine nucleoside + orthophosphate = purine + alpha-D-ribose 1-phosphate].	P9WP01	Rv3307	Mb3335	intermediary metabolism and respiration	27.571	11	51.1	0	50.179	25.5731	25.5034	25.8181	25.3984	26.0471	25.483	25.6884	25.7735	25.7529	26.187	24.5988	25.644	0.118649	0.154968	0.119095	0.166238	0.218236	0.261644
Rv0712	Conserved protein	Function unknown	I6Y8I5	Rv0712	Mb0733	conserved hypotheticals	32.743	7	38.8	0	75.371	24.3955	24.7999	25.2776	24.6734	24.729	24.4665	24.7168	24.2291	24.8127	24.0699	23.81	24.651	0.844031	0.647353	0.788281	0.445993	0.595383	0.409187
deoA	Probable thymidine phosphorylase DeoA (tdrpase) (pyrimidine phosphorylase)	The enzymes which catalyze the reversible phosphorylosis of pyrimidine nucleosides are involved in the degradation of these compounds and in their utilization as carbon and energy sources, or in the rescue of pyrimidine BASES for nucleotide synthesis [catalytic activity: thymidine + phosphate = thymine + 2-deoxy-D-ribose 1-phosphate].	P9WFS1	Rv3314c	Mb3343c	intermediary metabolism and respiration	44.486	12	45.7	0	51.584	23.5693	23.1915	23.9036	22.9765	24.4408	24.8871	22.9051	23.8671	24.2891	24.92	23.6947	24.3997	0.889793	-0.783342	0.128149	-0.236668	0.528779	-0.651028
sdhB	Probable succinate dehydrogenase (iron-sulphur protein subunit) SdhB (succinic dehydrogenase) (fumarate reductase) (fumarate dehydrogenase) (fumaric hydrogenase)	Involved in tricarboxylic acid cycle. Membrane-bound FAD-containing enzyme which is responsible for succinate interconversion [catalytic activity: succinate + acceptor = fumarate + reduced acceptor].	O53371	Rv3319	Mb3348	intermediary metabolism and respiration	29.349	13	46.8	0	81.093	27.3546	26.9299	27.1504	26.8504	27.5926	27.0497	27.1947	26.9487	27.0386	28.1275	27.134	27.734	0.76267	-0.520194	0.618002	-0.500906	0.95035	-0.604475
Rv3075c	Conserved protein	Function unknown	I6YF40	Rv3075c	Mb3102c	conserved hypotheticals	33.1	16	59.9	0	199.37	29.3332	29.3334	29.3525	29.3153	27.1889	29.3236	29.3767	29.2787	29.3744	25.7137	29.3785	29.0735	0.474422	1.28447	0.150554	0.554025	0.475754	1.28804
rpiB	Ribose-5-phosphate isomerase	Interconverts ribose-5-phosphate and ribulose-5-phosphate	P9WKD7	Rv2465c	Mb2492c	intermediary metabolism and respiration	17.277	12	92	0	280.05	29.8227	29.6352	29.4605	29.6676	30.2227	29.441	29.4998	29.5337	29.5649	29.8174	29.0131	29.661	0.205596	0.142321	0.342322	0.279935	0.049523	0.0356356
Rv3090	Unknown alanine and valine rich protein	Unknown	O05769	Rv3090	Mb3117	conserved hypotheticals	32.27	15	62.4	0	323.31	24.9867	24.4142	23.6515	23.2802	23.2312	24.1024	23.5701	23.6398	24.1146	25.8352	24.9208	25.1345	0.930523	-0.946054	1.94957	-1.75893	2.02637	-1.52201
ftsX	Putative cell division protein FtsX (septation component-transport integral membrane protein ABC transporter)	Involved in growth (principally during log phase cells). Thought to be involved in active transport of septation component across the membrane. Responsible for the translocation of the substrate across the membrane. Is coded in an operon essential for cell division.	P9WG19	Rv3101c	Mb3128c	cell wall and cell processes	32.819	14	35.7	0	262.39	23.4795	23.2005	24.0557	23.4625	23.9626	24.154	24.3765	24.3021	24.7056	25.9247	25.0592	25.1721	2.08767	-1.80675	1.95705	-1.52564	1.43871	-0.923948
Rv0774c	Probable conserved exported protein	Unknown; could have possibly a lipolytic activity.	I6Y8R4	Rv0774c	Mb0797c	cell wall and cell processes	30.654	3	16.8	0	37.952	24.4489	25.232	23.0515	23.4327	23.833	22.5145	24.0367	24.4454	23.076	24.8537	23.8503	23.6233	0.0633086	0.135007	0.714032	-0.849014	0.175272	-0.256391
dacB1	Probable penicillin-binding protein DacB1 (D-alanyl-D-alanine carboxypeptidase) (DD-peptidase) (DD-carboxypeptidase) (PBP) (DD-transpeptidase) (serine-type D-ala-D-ala carboxypeptidase) (D-amino acid hydrolase)	Involved in peptidoglycan synthesis (at final stages). Hydrolyzes the bound D-alanyl-D-alanine [catalytic activity: D-alanyl-D-alanine + H(2)O = 2 D-alanine].	O53380	Rv3330	Mb3363	cell wall and cell processes	41.682	6	24.4	0	57.472	23.8842	22.8078	22.8126	23.0335	24.4577	24.5457	23.2659	23.9777	24.4618	23.7731	23.5332	23.4512	0.490769	-0.417632	0.355241	0.426454	0.366246	0.315948
fprA	NADPH:adrenodoxin oxidoreductase FprA (NADPH-ferredoxin reductase)	Generates oxidized ferredoxin from ferredoxin [catalytic activity: reduced ferredoxin + NADP(+) = oxidized ferredoxin + NADPH].	P9WIQ3	Rv3106	Mb3133	intermediary metabolism and respiration	49.355	24	72.8	0	165.58	27.8589	27.8412	28.4738	25.7139	23.7706	28.1966	28.9397	28.2617	28.3416	27.264	28.9008	28.5366	0.119073	-0.175821	0.786081	-2.34008	0.199935	0.280512
Rv2475c	Conserved protein	Function unknown	I6Y9E8	Rv2475c	Mb2502c	conserved hypotheticals	15.765	9	82.6	0	146.55	28.2363	28.1665	28.1738	28.2791	27.7098	27.7815	28.0231	28.2099	28.0946	27.2867	28.1056	28.1868	0.504344	0.332452	0.0655587	0.0637277	0.35466	0.249442
metC	Probable O-acetylhomoserine sulfhydrylase MetC (homocysteine synthase) (O-acetylhomoserine (thiol)-lyase) (OAH sulfhydrylase) (O-acetyl-L-homoserine sulfhydrylase)	Transforms O-acetylhomoserine into L-methionine [catalytic activity: O-acetyl-L-homoserine + methanethiol = L-methionine + acetate].	O53390	Rv3340	Mb3372	intermediary metabolism and respiration	47.357	20	78.6	0	323.31	30.8822	30.8076	30.7221	30.5305	30.076	30.7312	30.9541	30.8237	30.853	31.3262	30.9561	30.98	1.03824	-0.283472	1.31902	-0.641572	0.769714	-0.210542
Rv0801	Conserved protein	Function unknown	O06633	Rv0801	Mb0824	conserved hypotheticals	12.512	6	57.4	0	13.106	27.0034	26.953	26.9456	26.8197	27.5297	26.601	26.7056	26.8243	26.9768	26.9798	26.2389	26.699	0.689171	0.328102	0.413746	0.344245	0.355599	0.196347
tgs1	Triacylglycerol synthase (diacylglycerol acyltransferase) Tgs1	Involved in synthesis of triacylglycerol	P9WKC9	Rv3130c	Mb3154c	lipid metabolism	50.72	7	23.1	0	21.446	23.6601	24.2242	23.0138	23.707	25.3299	23.8379	23.3377	23.8659	22.9228	24.4507	22.3043	22.6431	0.265442	0.500011	0.615564	1.15888	0.12324	0.242746
ppe50	PPE family protein PPE50	Function unknown	Q6MX07	Rv3135	Mb3159	PE/PPE	38.408	6	42.3	0	112.28	23.8973	24.1253	23.5714	24.1839	24.2626	22.4828	23.6864	25.0702	23.6409	24.198	26.0148	22.4087	0.118401	-0.342484	0.179973	-0.564058	0.0218147	-0.0746485
Rv0812	Probable amino acid aminotransferase	Acts on amino acids.	Q79FW0	Rv0812	Mb0835	intermediary metabolism and respiration	31.122	9	37	0	15.179	24.6337	24.5313	24.4501	24.7387	23.4364	24.2186	23.6279	25.187	24.9274	23.6485	24.8251	24.8241	0.095642	0.105808	0.214897	-0.301359	0.0844473	0.148169
fadE23	Probable acyl-CoA dehydrogenase FadE23	Function unknown, but involved in lipid degradation.	P95186	Rv3140	Mb3164	lipid metabolism	43.344	25	71.1	0	323.31	30.2149	29.9276	29.6133	30.0887	28.5737	30.6221	30.1563	29.7826	29.8949	29.4209	30.3469	30.3539	0.125722	-0.121957	0.151497	-0.279069	0.105103	-0.095967
bkdA	Probable branched-chain keto acid dehydrogenase E1 component, alpha subunit BkdA	Involved in energy metabolism. The branched-chain alpha-keto acid dehydrogenase complex catalyzes the overall conversion of branched chain alpha-keto acids to acyl-CoA and CO2. It contains multiple copies of three enzymatic components: branched-chain alpha-keto acid decarboxylase (E1), lipoamide acyltransferase (E2) and lipoamide dehydrogenase (E3).	P9WIS3	Rv2497c	Mb2525c	intermediary metabolism and respiration	40.615	23	64.3	0	88.838	28.2406	28.2243	28.1902	27.9747	28.5053	27.4142	27.243	28.1782	27.8048	27.8588	28.0878	27.4623	1.06508	0.415394	0.167563	0.161747	0.0648087	-0.0609659
nuoA	Probable NADH dehydrogenase I (chain A) NuoA (NADH-ubiquinone oxidoreductase chain A)	Involved in aerobic|anaerobic respiration [catalytic activity: NADH + ubiquinone = NAD(+) + ubiquinol].	P9WIW7	Rv3145	Mb3169	intermediary metabolism and respiration	13.975	3	23.4	0	81.561	24.2907	23.8655	24.0641	23.1656	24.08	22.8667	23.8808	23.0329	23.5353	23.9813	23.1373	25.0084	0.0186554	0.0311228	0.441733	-0.671541	0.397937	-0.559299
nuoL	Probable NADH dehydrogenase I (chain L) NuoL (NADH-ubiquinone oxidoreductase chain L)	Involved in aerobic|anaerobic respiration [catalytic activity: NADH + ubiquinone = NAD(+) + ubiquinol].	P9WIW1	Rv3156	Mb3180	intermediary metabolism and respiration	66.167	13	21	0	166.44	24.0553	23.6891	23.8044	23.3348	23.0366	25.0042	23.458	23.4996	23.7125	23.6853	23.4826	23.6374	0.932746	0.24785	0.111948	0.190104	0.17082	-0.0450783
accD1	Probable acetyl-/propionyl-CoA carboxylase (beta subunit) AccD1	Involved in fatty acid metabolism.	I6YDK7	Rv2502c	Mb2530c	lipid metabolism	56.773	13	39.1	0	112.23	25.0793	24.3921	23.9246	23.5618	23.3452	25.1305	24.9973	24.9672	23.0146	23.972	24.9204	24.7745	0.0707939	-0.0903187	0.355935	-0.543151	0.115857	-0.229251
Rv0818	Transcriptional regulatory protein	Involved in transcriptional mechanism.	O53830	Rv0818	Mb0841	regulatory proteins	27.597	10	41.6	0	175.59	26.7375	26.4524	26.3937	27.115	26.1971	27.0685	27.3042	26.3955	27.1522	25.5387	26.8516	26.8482	0.091103	0.115022	0.29092	0.380667	0.44473	0.537779
desA1	Probable acyl-[acyl-carrier protein] desaturase DesA1 (acyl-[ACP] desaturase) (stearoyl-ACP desaturase) (protein Des)	Catalyzes the principal conversion of saturated fatty acids to unsaturated fatty acids. Thought to convert stearoyl-ACP to oleoyl-ACP by introduction of a cis double bond between carbons delta-9 and delta-10 of the acyl chain [catalytic activity: stearoyl-[acyl-carrier protein] + AH2 + O2 = oleoyl-[acyl-carrier protein] + a + 2 H2O].	P9WNZ7	Rv0824c	Mb0847c	lipid metabolism	38.77	31	88.2	0	323.31	31.9364	31.7069	31.7291	31.5241	29.3725	32.0767	31.9658	31.46	31.941	30.109	31.8109	31.9251	0.35839	0.509108	0.103249	-0.290548	0.344563	0.50729
Rv2522c	Conserved hypothetical protein	Function unknown	I6X4J0	Rv2522c	Mb2551c	conserved hypotheticals	49.325	8	23	0	7.1109	24.1909	23.8694	23.9271	24.8557	24.5084	22.8681	24.3888	24.6821	22.8076	24.784	24.3211	24.616	1.58318	-0.577886	0.324833	-0.496308	0.44111	-0.614213
Rv2532c	Hypothetical protein	Unknown	P95021	Rv2532c	Mb2561c	conserved hypotheticals	14.273	2	15	0	3.0798	22.6543	23.4525	24.2835	23.4739	25.2715	23.4539	23.0738	23.1324	24.2516	24.9158	24.6194	23.9942	0.898495	-1.04635	0.268331	-0.443346	1.02336	-1.02384
Rv3369	Conserved protein	Function unknown	O50398	Rv3369	Mb3404	conserved hypotheticals	15.718	4	38.2	0	166.67	28.2862	28.3245	28.3398	28.12	29.3156	28.6234	28.2417	28.1822	28.2412	28.7932	27.8387	28.3083	0.00401962	0.00339063	0.349617	0.372896	0.121155	-0.0917168
Rv3376	Conserved hypothetical protein	Function unknown	P9WMS5	Rv3376	Mb3410	conserved hypotheticals	23.664	7	43.8	0	13.617	24.6725	24.1395	24.0457	23.6759	24.0098	24.6608	24.7881	23.6265	22.8877	23.5066	25.1106	22.7358	0.277568	0.501568	0.164751	0.331172	0.00620729	-0.0168743
Rv3205c	Conserved protein	Function unknown	O05861	Rv3205c	Mb3230c	conserved hypotheticals	31.351	12	55.8	0	40.702	24.8347	23.1364	23.6869	24.3639	23.6241	24.7804	24.1559	23.0576	24.7823	24.032	24.1675	24.8811	0.347941	-0.474192	0.0861501	-0.104082	0.252253	-0.361628
glnQ	Probable glutamine-transport ATP-binding protein ABC transporter GlnQ	Thought to be involved in active transport of glutamine across the membrane (import). Responsible for the translocation of the substrate across the membrane.	P9WQI5	Rv2564	Mb2593	cell wall and cell processes	35.428	12	43.9	0	125.34	28.2747	28.084	28.1477	27.9085	27.0363	28.1523	27.967	28.1589	28.0387	27.699	28.1998	28.4602	0.0749571	0.0491314	0.445546	-0.420615	0.10106	-0.0647844
Rv2568c	Conserved hypothetical protein	Function unknown	P9WL95	Rv2568c	Mb2598c	conserved hypotheticals	38.002	11	42.5	0	130.06	26.864	26.6242	26.4827	26.5908	25.8424	26.3094	26.4238	26.5835	26.4278	26.7253	26.3736	27.2269	0.164071	-0.118328	0.732762	-0.527786	0.514565	-0.296949
Rv0877	Conserved hypothetical protein	Function unknown	P9WKR3	Rv0877	Mb0901	conserved hypotheticals	27.469	8	45.8	0	66.904	25.7225	26.0662	25.209	26.3147	26.1601	26.3763	26.1292	26.1586	25.7352	24.189	25.5117	25.8667	0.348218	0.476725	0.997864	1.09458	0.707117	0.81854
secF	Probable protein-export membrane protein SecF	Involved in protein export. Part of the prokaryotic protein translocation apparatus which comprise SECA, SECB, SECD, SECE, SECF, SECG and SECY.	P9WGN9	Rv2586c	Mb2617c	cell wall and cell processes	47.013	11	35.1	0	132.56	25.6302	25.5136	24.2122	24.5292	23.7459	24.9637	25.4357	22.8953	23.5607	26.0607	26.0137	24.411	0.205609	-0.376444	0.767877	-1.08221	0.753271	-1.53124
Rv3404c	Conserved hypothetical protein	Unknown	P9WKZ3	Rv3404c	Mb3438c	conserved hypotheticals	26.515	11	57.7	0	137.3	26.2739	26.1285	26.3145	26.2514	22.8356	26.3846	26.0964	25.796	26.3618	23.4286	25.7586	26.4853	0.476767	1.01483	0.0149516	-0.066939	0.387151	0.860576
Rv0898c	Conserved hypothetical protein	Function unknown	P9WKP5	Rv0898c	Mb0922c	conserved hypotheticals	9.92	2	33.3	0	102.74	23.4025	23.4056	23.2515	24.1754	24.1965	23.9833	23.3974	23.9263	23.3259	24.706	23.4209	24.5283	1.00158	-0.865211	0.0870902	-0.100013	0.684169	-0.668518
choD	Cholesterol oxidase ChoD (cholesterol-O2 oxidoreductase)	Involved in cholesterol metabolism [catalytic activity: cholesterol + O(2) = cholest-4-en-3-one + H(2)O(2)].	P9WMV9	Rv3409c	Mb3443c	lipid metabolism	63.023	22	52.4	0	82.976	26.5065	26.5323	26.3927	26.3871	25.734	26.8459	27.179	26.5163	26.9001	27.6459	26.6308	26.8201	0.816877	-0.555033	0.724321	-0.709922	0.172772	-0.167093
Rv0906	Conserved protein	Function unknown	P9WKP3	Rv0906	Mb0930	conserved hypotheticals	40.641	20	84.9	0	220.69	23.5198	24.3996	23.9331	23.4169	24.5666	23.5133	22.4372	25.0719	23.7491	23.7581	23.4944	24.2784	0.113362	0.10719	0.00859205	-0.0113462	0.0388305	-0.0908718
Rv2599	Probable conserved membrane protein	Unknown	P9WL69	Rv2599	Mb2630	cell wall and cell processes	14.955	3	40.6	0	41.444	22.8135	24.6197	23.684	22.7293	24.4155	23.4508	24.185	23.9901	24.7942	23.9037	24.1957	22.5567	0.0743541	0.153692	0.00945881	-0.0201797	0.618901	0.771013
Rv3271c	Probable conserved integral membrane protein	Unknown	P96876	Rv3271c	Mb3299c	cell wall and cell processes	23.633	2	13.5	0	39.726	23.1938	22.9587	23.3556	23.2107	24.3576	23.6099	23.5673	23.3667	23.7685	23.3609	24.1684	24.8661	1.00358	-0.962409	0.299804	-0.405708	0.555573	-0.564259
Rv0926c	Conserved hypothetical protein	Function unknown	I6WZS8	Rv0926c	Mb0949c	conserved hypotheticals	37.751	14	58.1	0	191.12	29.7423	29.3513	29.5263	29.5687	23.3248	29.6113	29.6336	29.3595	29.4398	26.5545	29.38	29.4535	0.488101	1.07732	0.156745	-0.961059	0.457174	1.015
glmS	Probable glucosamine--fructose-6-phosphate aminotransferase [isomerizing] GlmS (hexosephosphate aminotransferase) (D-fructose-6-phosphate amidotransferase) (GFAT) (L-glutamine-D-fructose-6-phosphate amidotransferase) (glucosamine-6-phosphate synthase)	Catalyzes the first step in hexosamine metabolism, converting fructose-6P into glucosamine-6P using glutamine as a nitrogen source [catalytic activity: L-glutamine + D-fructose 6-phosphate = L-glutamate + D-glucosamine 6-phosphate].	P9WN49	Rv3436c	Mb3466c	intermediary metabolism and respiration	67.571	28	64.1	0	183.55	26.1968	25.0794	26.0257	24.2421	25.242	25.7536	26.1537	25.5217	25.8943	25.1031	25.6381	26.1281	0.114718	0.144213	0.436938	-0.54386	0.26818	0.23347
purK	Probable phosphoribosylaminoimidazole carboxylase ATPase subunit PurK (air carboxylase) (AIRC)	Involved in purine biosynthesis (sixth step). Possesses an ATPase activity that is dependent on the presence of air (aminoimidazole ribonucleotide). The association of PURK and pure produces an enzyme complex capable of converting air to CAIR efficiently under physiological condition [catalytic activity: 1-(5-phosphoribosyl)-5-amino-4-imidazole-carboxylate = 1-(5-phosphoribosyl)-5-aminoimidazole …	P9WHL9	Rv3276c	Mb3304c	intermediary metabolism and respiration	45.695	19	61.1	0	243.89	29.4342	29.4112	29.1966	29.3463	29.5905	29.3804	29.3513	29.1327	29.233	29.7483	29.1965	29.3176	0.149007	-0.073499	0.033515	0.018259	0.435231	-0.181814
pstS1	Periplasmic phosphate-binding lipoprotein PstS1 (PBP-1) (PstS1)	Involved in active transport of inorganic phosphate across the membrane (import). This is one of the proteins required for binding-protein-mediated phosphate transport.	P9WGU1	Rv0934	Mb0959	cell wall and cell processes	38.215	14	65.5	0	323.31	24.945	28.288	28.0131	27.8814	28.762	28.8944	27.1878	27.9263	27.3843	28.6011	26.6051	27.2672	0.122302	-0.409075	0.697449	1.02146	0.00435416	0.00834147
Rv2620c	Probable conserved transmembrane protein	Unknown	I6Y9U6	Rv2620c	Mb2653c	cell wall and cell processes	14.639	2	9.2	0	32.262	23.3641	23.84	25.5989	24.8587	24.0153	23.8554	22.8602	23.5801	23.3491	25.0628	24.1875	24.0089	0.0705959	-0.152032	0.145697	-0.176608	1.38813	-1.15661
accE5	Probable bifunctional protein acetyl-/propionyl-coenzyme A carboxylase (epsilon chain) AccE5	Involved in long-chain fatty acid synthesis	P96886	Rv3281	Mb3309	lipid metabolism	16.887	7	89.1	0	90.424	25.972	24.3862	22.3951	26.9805	24.1967	27.5673	23.2412	25.5643	24.1063	23.9868	23.0011	25.0005	0.0756449	0.25497	0.882207	2.25206	0.126692	0.307789
Rv0939	Possible bifunctional enzyme: 2-hydroxyhepta-2,4-diene-1,7-dioate isomerase (HHDD isomerase) + cyclase/dehydrase	Function unknown; probably involved in cellular metabolism, possibly in a degradation pathway.	O86346	Rv0939	Mb0964	intermediary metabolism and respiration	69.353	2	5.6	0	17.026	24.2298	23.6626	22.7175	23.239	23.4513	23.0099	23.4838	22.2088	23.682	23.9072	23.744	23.9164	0.290286	-0.319187	1.95592	-0.622469	0.718935	-0.731016
rip3	Probable conserved transmembrane alanine and leucine rich protein	Unknown	P9WHR1	Rv2625c	Mb2658c	cell wall and cell processes	41.48	11	42.5	0	55.872	24.1959	24.1063	23.1434	23.6364	24.2991	24.5237	23.95	23.7162	22.9383	24.7107	23.664	23.817	0.204796	-0.248716	0.0742781	0.0891266	0.519471	-0.529079
amiB1	Probable amidohydrolase AmiB1 (aminohydrolase)	Involved in cellular metabolism, active on carbon aliphatic amides and/or on many aromatic amides [catalytic activity: a monocarboxylic acid amide + H(2)O = a monocarboxylate + NH(3)].	L7N690	Rv3306c	Mb3334c	intermediary metabolism and respiration	40.74	14	51.3	0	123.53	27.3559	27.6335	27.579	27.2105	27.3575	27.3287	27.3382	27.1592	27.3225	27.9115	27.1221	27.7236	0.0884693	-0.0629145	0.519984	-0.286847	0.566999	-0.312436
purN	Probable 5'-phosphoribosylglycinamide formyltransferase PurN (GART) (gar transformylase) (5'-phosphoribosylglycinamide transformylase)	Involved in de novo purine biosynthesis (at the third step) [catalytic activity: 10-formyltetrahydrofolate + 5'-phosphoribosylglycinamide = tetrahydrofolate + 5'-phosphoribosyl-N-formylglycinamide].	P9WHM5	Rv0956	Mb0981	intermediary metabolism and respiration	22.415	12	80.5	0	145.93	27.5968	27.436	27.4609	27.4935	25.0172	27.6235	27.6909	27.1725	27.599	27.167	27.632	27.7945	0.0592325	-0.0332756	0.399388	-0.819798	0.061482	-0.0437063
sdhA	Probable succinate dehydrogenase (flavoprotein subunit) SdhA (succinic dehydrogenase) (fumarate reductase) (fumarate dehydrogenase) (fumaric hydrogenase)	Involved in tricarboxylic acid cycle. Membrane-bound FAD-containing enzyme which is responsible for succinate interconversion [catalytic activity: succinate + acceptor = fumarate + reduced acceptor].	O53370	Rv3318	Mb3347	intermediary metabolism and respiration	64.825	27	52.2	0	323.31	29.1944	29.0489	29.0867	28.8595	28.9292	29.0334	28.9886	29.2064	29.0861	29.9117	29.4954	29.2465	1.04208	-0.441226	1.41763	-0.61053	1.05368	-0.457508
fadE12	Acyl-CoA dehydrogenase FadE12	Function unknown, but involved in lipid degradation.	A0A0H3M981	Rv0972c	Mb0997c	Lipid metabolism	41.524	1	6.4	0	150.46	26.5361	26.8663	26.8902	27.2635	27.4363	26.8834	27.2504	27.3218	27.0567	27.9625	27.2291	27.0864	1.05605	-0.661818	0.296531	-0.231589	0.312668	-0.216349
Rv3483c	Possible exported protein	Function unknown	I6X7F2	Rv3483c	Mb3513c	cell wall and cell processes	22.982	4	27.7	0	27.728	24.3948	22.8065	24.5735	24.0595	23.9572	23.4253	23.9906	22.9336	23.2686	23.1705	23.8057	22.9923	0.418047	0.602122	0.710865	0.491177	0.0654964	0.074789
moaX	Probable MoaD-MoaE fusion protein MoaX	Thought to be involved in molybdenum cofactor biosynthesis.	Q6MWY3	Rv3323c	Mb3352c	intermediary metabolism and respiration	24.05	4	22.6	0	31.826	24.7458	24.4929	23.7631	24.9472	24.4568	24.656	24.5989	24.576	25.0014	24.7507	24.6472	24.8586	0.625585	-0.418249	0.15858	-0.0655162	0.0614977	-0.0267588
Rv3488	Conserved hypothetical protein	Function unknown	I6X7F9	Rv3488	Mb3518	conserved hypotheticals	11.928	3	43.9	0	21.439	23.8412	24.7424	24.7104	24.8203	24.8066	24.4216	25.0984	24.1723	24.7744	25.2748	24.4322	23.9828	0.0984739	-0.131917	0.107785	0.119562	0.0905143	0.118426
moaB2	Possible pterin-4-alpha-carbinolamine dehydratase MoaB2 (PHS) (4-alpha- hydroxy-tetrahydropterin dehydratase) (pterin-4-a-carbinolamine dehydratase) (phenylalanine hydroxylase-stimulating protein) (PHS) (pterin carbinolamine dehydratase) (PCD)	Thought to be involved in molybdopterin biosynthesis. Catalyzes the dehydratation of 4A-hydroxytetrahydropterins [catalytic activity: (6R)-6-(L-erythro-1,2-dihydroxypropyl)-5,6,7,8-tetrahydro-4A-hydroxypterin = (6R)-6-(L-erythro-1,2- dihydroxypropyl)-7,8-dihydro-6H-pterin + H(2)O.].	O53897	Rv0984	Mb1010	intermediary metabolism and respiration	18.441	8	70.7	0	323.31	30.3573	30.1646	30.3326	30.1505	30.4089	30.086	30.0738	30.1096	30.1049	30.4282	30.2111	30.314	0.139821	-0.0329367	0.366879	-0.102613	1.59557	-0.221659
Rv2675c	Conserved hypothetical protein	Function unknown	I6Y1G8	Rv2675c	Mb2694c	conserved hypotheticals	27.545	7	39.2	0	70.185	27.4325	27.4231	27.4123	25.6495	23.8733	27.3327	27.2774	27.1652	27.422	27.3278	27.1327	27.0776	1.48071	0.243285	0.711825	-1.56087	0.439316	0.108815
mce4F	Mce-family protein Mce4F	Unknown, but thought to be involved in host cell invasion. Predicted to be involved in lipid catabolism.	I6YC95	Rv3494c	Mb3524c	virulence, detoxification, adaptation	59.636	7	20.2	0	8.0274	23.984	23.6361	24.2603	23.2836	23.6002	24.0304	24.0091	25.6341	24.1945	23.5715	23.3146	24.3499	0.234628	0.214859	0.101664	-0.107244	0.653296	0.867284
fadE26	Probable acyl-CoA dehydrogenase FadE26	Function unknown, but involved in lipid degradation.	I6YCA3	Rv3504	Mb3534	lipid metabolism	43.784	15	46.2	0	133.65	26.7054	27.3451	27.178	26.6164	24.6405	26.8344	27.1337	26.7595	27.4619	27.0521	26.6203	26.9925	0.330037	0.187889	0.531751	-0.857851	0.399393	0.230096
trkA	TRK system potassium uptake protein CeoC	Part of a potassium transport system.	P9WFZ3	Rv2692	Mb2711	cell wall and cell processes	23.933	9	49.5	0	130.31	27.2153	26.6427	26.4586	27.1314	26.5298	26.7287	27.1449	26.9879	26.941	27.4447	27.5441	27.0827	1.02674	-0.584996	1.16747	-0.560519	1.01934	-0.332564
ilvX	Probable acetohydroxyacid synthase IlvX (acetolactate synthase)	Could be involved in valine and isoleucine biosynthesis (at the first step) [catalytic activity: 2-acetolactate + CO(2) = 2 pyruvate].	O53554	Rv3509c	Mb3539c	intermediary metabolism and respiration	52.072	27	67.2	0	323.31	31.494	31.6954	31.64	31.6551	32.1137	31.6762	31.656	31.6032	31.74	32.0943	31.4026	31.492	0.0835196	-0.0531756	0.225424	0.152038	0.00514104	0.00346502
fadD19	Fatty-acid-CoA ligase FadD19 (fatty-acid-CoA synthetase) (fatty-acid-CoA synthase)	Function unknown, but involved in lipid degradation.	P9WQ51	Rv3515c	Mb3544c	lipid metabolism	59.74	28	64.2	0	285.92	27.1326	27.29	28.0197	23.2512	23.0334	27.5517	27.9724	27.6413	27.8681	24.6295	27.4833	27.8973	0.311455	0.810722	0.501208	-2.05794	0.488301	1.15722
sigA	RNA polymerase sigma factor SigA (sigma-A)	The sigma factor is an initiation factor that promotes attachment of the RNA polymerase to specific initiation sites and then is released. This is the primary sigma-factor of this bacteria. Supposedly involved in the housekeeping regulons.	P9WGI1	Rv2703	Mb2722	information pathways	57.8	20	38.4	0	323.31	28.2489	28.1773	28.2406	28.2583	28.3069	28.1981	28.2425	27.9967	28.1915	28.6642	28.387	28.4875	1.58587	-0.290641	1.38728	-0.258501	1.54309	-0.369373
prs	Probable ribose-phosphate pyrophosphokinase PrsA (phosphoribosyl pyrophosphate synthetase) (PRPP synthetase)	Catalyzes the formation of PRPP from ATP and ribose 5-phosphate. PRPP is then used in various biosynthetic pathways, as for example in the formation of purines, pyrimidines, histidine and tryptophan. [catalytic activity: ATP + D-ribose 5-phosphate = AMP + 5-phospho-alpha-D-ribose 1-diphosphate]	P9WKE3	Rv1017c	Mb1045c	intermediary metabolism and respiration	35.477	28	88	0	323.31	31.2266	31.358	31.3566	31.3058	31.3056	31.034	31.2045	31.242	31.2807	32.0669	31.2913	31.5066	0.583736	-0.307853	0.752098	-0.406448	0.749967	-0.379176
Rv3519	Unknown protein	Unknown	O53564	Rv3519	Mb3549	conserved hypotheticals	25.96	8	40.7	0	49.723	24.3828	24.0718	24.2032	22.813	23.3396	23.8954	23.0167	23.1388	23.9569	23.8465	23.0724	24.7784	0.253519	0.320161	0.398258	-0.549747	0.387188	-0.528284
Rv1024	Possible conserved membrane protein	Unknown	P96376	Rv1024	Mb1052	cell wall and cell processes	24.57	5	22.4	0	12.87	24.3425	23.4858	24.2778	24.0097	24.1786	23.0045	24.8156	24.2876	24.2997	24.8136	24.8373	22.8577	0.0657153	-0.134183	0.228612	-0.4386	0.165478	0.298096
fadD19	Fatty-acid-CoA ligase FadD19 (fatty-acid-CoA synthetase) (fatty-acid-CoA synthase)	Function unknown, but involved in lipid degradation.	A0A0H3M9C6	Rv3515c	Mb3544c	Lipid metabolism	35.59	2	14.5	0	323.31	28.0369	27.9059	27.6548	27.97	27.1921	28.6701	28.004	27.6384	27.9776	25.9719	27.8378	27.6191	0.531192	0.722909	0.478166	0.801121	0.536461	0.730405
hsaE	Probable hydratase	Function unknown; probably involved in cellular metabolism. Predicted to be involved in lipid catabolism.	I6XHH5	Rv3536c	Mb3566c	intermediary metabolism and respiration	27.891	10	60.2	0	129.94	27.4763	27.7176	27.7746	28.108	25.3292	27.9474	27.6728	27.6353	27.9568	26.3989	27.5269	28.0309	0.275749	0.337235	0.0649802	-0.190695	0.370147	0.436026
fadA5	Probable acetyl-CoA acetyltransferase FadA5 (acetoacetyl-CoA thiolase)	Function unknown, but involved in lipid degradation [catalytic activity: 2 acetyl-CoA = CoA + acetoacetyl-CoA].	I6XHI4	Rv3546	Mb3576	lipid metabolism	41.328	11	48.3	0	92.895	27.1707	27.7081	27.3903	27.6128	27.7837	27.0446	27.1249	26.7838	27.4672	28.0032	26.6839	27.4709	0.0301454	0.0370534	0.0747219	0.0943629	0.238108	-0.260664
Rv3551	Possible CoA-transferase (alpha subunit)	Function unknown. Probable subunit of a CoA-transferase composed of Rv3551|MTCY03C7.05c and Rv3552|MTCY03C7.03c.	P9WPW1	Rv3551	Mb3581	intermediary metabolism and respiration	31.723	7	55.5	0	29.968	25.4816	25.448	25.491	25.3297	26.1252	25.1533	25.8957	25.4321	25.9499	26.1516	25.2637	25.5236	0.260895	-0.172743	0.0992156	-0.110243	0.133988	0.11293
ephG	Epoxide hydrolase	Biotransformation enzyme that catalyzes the hydrolysis of epoxides (alkene oxides, oxiranes) and arene oxides to less reactive and more water soluble dihydrodiols by the trans addition of water. Involved in detoxification reactions following oxidative damage to lipids [catalytic activity: an epoxide + H(2)O = a glycol].	O33283	Rv2740	Mb2760	virulence, detoxification, adaptation	16.593	8	72.5	0	164.3	22.7585	24.1875	22.4456	24.4518	24.5822	24.8563	23.1997	24.1537	23.8486	25.0461	24.8228	25.1354	1.57948	-1.87091	1.15509	-0.371342	1.89056	-1.26744
fadA6	Probable acetyl-CoA acetyltransferase FadA6 (acetoacetyl-CoA thiolase)	Function unknown, but involved in lipid degradation [catalytic activity: 2 acetyl-CoA = CoA + acetoacetyl-CoA].	I6XHJ3	Rv3556c	Mb3586c	lipid metabolism	40.902	19	55.2	0	187.46	28.8111	28.8858	28.7394	28.5555	29.1614	28.6467	28.6186	28.6538	28.7528	29.0351	28.5422	28.6313	0.183821	0.0758921	0.0749831	0.0516504	0.144745	-0.0611375
Rv2743c	Possible conserved transmembrane alanine rich protein	Unknown	I6YA50	Rv2743c	Mb2764c	cell wall and cell processes	28.961	6	23.3	0	12.605	24.9198	24.5007	23.5547	24.0366	24.2121	24.1799	24.2665	24.6441	23.1381	23.9454	24.1927	22.3235	0.51653	0.837855	0.48441	0.65568	0.288694	0.529073
Rv3368c	Possible oxidoreductase	Function unknown; probably involved in cellular metabolism	O50397	Rv3368c	Mb3403c	intermediary metabolism and respiration	23.733	16	66.8	0	107.46	28.8986	28.8817	28.8953	29.1351	28.3965	28.8409	28.8254	29.102	28.8754	29.1558	28.8651	28.9181	0.417677	-0.0877953	0.335126	-0.188863	0.135787	-0.0454133
nat	Arylamine N-acetyltransferase Nat (arylamine acetylase)	Could have a role in acetylating, and hence inactivating, the antitubercular drug isoniazid [catalytic activity: acetyl-CoA + arylamine = CoA + N-acetylarylamine].	P9WJI5	Rv3566c	Mb3596c	intermediary metabolism and respiration	31.029	9	48.1	0	119.43	26.7279	26.6084	26.9476	26.7496	27.2035	26.4032	26.7843	26.8255	26.7367	27.5823	26.7894	26.6071	0.298087	-0.231653	0.212739	-0.20752	0.282601	-0.210758
amiD	Probable amidase AmiD (acylamidase) (acylase)	Involved in cellular metabolism [catalytic activity: a monocarboxylic acid amide + H(2)O = a monocarboxylate + NH(3)].	P9WQ93	Rv3375	Mb3409	intermediary metabolism and respiration	50.645	11	29.3	0	151.58	23.8916	24.6998	25.2692	23.4694	24.0628	24.1275	25.2205	25.2373	25.0081	23.9995	24.7079	24.9697	0.0422468	0.06121	0.875641	-0.672439	0.932179	0.596284
hsaA	Possible oxidoreductase. Possible 3-hydroxy-9,10-seconandrost-1,3,5(10)-triene-9,17-dione hydroxylase.	Function unknown; probably involved in cellular metabolism. Predicted to be involved in lipid catabolism.	P9WJA1	Rv3570c	Mb3601c	intermediary metabolism and respiration	43.143	25	74.6	0	323.31	29.3751	29.5775	29.509	29.4891	29.507	29.5262	29.5289	29.3963	29.4438	29.2818	29.1621	29.3875	1.12032	0.210053	1.59993	0.230297	1.11201	0.179227
lpqE	Possible conserved lipoprotein LpqE	Unknown	P9WK63	Rv3584	Mb3615	cell wall and cell processes	18.818	10	71.4	0	323.31	24.2418	26.3051	26.4462	26.2816	26.8407	27.5156	23.6804	26.9826	25.4988	27.8532	25.9412	27.2586	0.675962	-1.3533	0.0725877	-0.138341	0.666261	-1.63038
Rv1072	Probable conserved transmembrane protein	Unknown	O53420	Rv1072	Mb1101	cell wall and cell processes	29.143	7	19.4	0	36.144	23.4085	24.5721	24.4972	23.979	23.2113	24.2498	23.7118	24.6133	24.3132	24.3129	23.9118	23.6587	0.178638	0.198139	0.15114	-0.147755	0.31538	0.251622
cmaA1	Cyclopropane-fatty-acyl-phospholipid synthase 1 CmaA1 (cyclopropane fatty acid synthase) (CFA synthase) (cyclopropane mycolic acid synthase 1)	Has cyclopropane function. Transfers a methylene group from S-adenosyl-L-methionine to the cis double bond of an unsaturated fatty acid chain resulting in the replacement of the double bond with a methylene bridge. Mycolic acids, which represent the major constituent of mycobacterial cell wall complex, act as substrates [catalytic activity: S-adenosyl-L-methionine + phospholipidolefinic fatty aci…	P9WPB7	Rv3392c	Mb3424c	lipid metabolism	32.434	14	77	0	215.16	28.3708	28.007	28.0131	26.4955	24.3861	28.1949	27.8235	27.3806	28.0255	28.4126	27.8796	28.2349	0.081221	-0.0454095	0.749962	-1.81686	0.811516	-0.432491
Rv2765	Probable alanine rich hydrolase	Function unknown; probably involved in cellular metabolism.	I6XF92	Rv2765	Mb2787	intermediary metabolism and respiration	26.159	15	73.9	0	323.31	29.1638	28.8979	28.864	28.9808	29.2744	28.9208	28.9437	29.0403	28.8283	29.3996	28.6888	28.8629	0.0120405	-0.00853157	0.113122	0.0749098	0.072987	-0.0463041
cbs	Probable cystathionine beta-synthase Cbs (serine sulfhydrase) (beta-thionase) (hemoprotein H-450)	Thought to be involved in homocysteine transulfuration [catalytic activity: L-serine + L-homocysteine = cystathionine + H2O]	P9WP51	Rv1077	Mb1106	intermediary metabolism and respiration	48.635	26	79.7	0	323.31	30.2602	30.3033	30.232	30.2417	30.5892	30.2287	30.2355	30.3777	30.4275	30.7089	30.2596	30.2265	0.352523	-0.133129	0.0816147	-0.0451082	0.112389	-0.0514342
Rv1083	Conserved hypothetical protein	Function unknown	O53431	Rv1083	Mb1112	conserved hypotheticals	9.2955	3	37.5	0	46.319	23.375	23.5545	24.5694	23.296	24.5145	24.447	22.8096	24.0002	22.3332	24.0862	23.212	24.6803	0.101515	-0.159842	0.055178	0.0930049	0.653916	-0.945168
Rv1097c	Probable membrane glycine and proline rich protein	Unknown	O53445	Rv1097c	Mb1127c	cell wall and cell processes	29.873	5	29	0	157.57	24.7338	23.7235	23.7039	23.0635	24.6874	24.4321	23.8925	23.4511	24.5005	23.8512	24.5268	24.5859	0.257167	-0.267513	0.177578	-0.260253	0.412266	-0.373229
espA	ESX-1 secretion-associated protein A, EspA	Function unknown	P9WJE1	Rv3616c	Mb3646c	cell wall and cell processes	39.888	11	34.4	0	323.31	23.7149	23.9097	23.4396	23.889	24.9175	22.7778	23.0314	24.6706	22.8009	22.305	23.3442	24.278	0.257301	0.379012	0.262063	0.552385	0.0828633	0.191898
ispH1	Probable LYTB-related protein LytB2	Unknown. In other organisms, LYTB product is involved in penicillin tolerance and control of the stringent response.	P9WKG1	Rv1110	Mb1140	cell wall and cell processes	36.297	10	52.5	0	26.405	25.3606	25.7136	25.7709	25.2153	25.0898	25.656	25.5431	25.8827	25.5157	23.5606	25.4202	25.5058	0.535463	0.786172	0.304313	0.491515	0.562783	0.818318
Rv3627c	Conserved protein	Function unknown (possibly involved in cell wall biosynthesis).	O06380	Rv3627c	Mb3651c	conserved hypotheticals	46.89	18	65.3	0	323.31	26.6807	26.756	23.0931	24.9324	22.738	23.0644	26.1918	24.9066	23.4785	24.057	23.7676	26.1903	0.229764	0.838291	0.460593	-1.09337	0.0593022	0.187377
Rv3435c	Probable conserved transmembrane protein	Unknown	O06252	Rv3435c	Mb3465c	cell wall and cell processes	30.622	6	26.4	0	60.141	23.7952	22.3602	23.6922	24.29	24.5233	23.4721	23.6174	24.2432	28.6299	23.3174	23.6489	24.5935	0.403222	-0.570763	0.185452	0.241855	0.433685	1.64353
pbpA	Probable penicillin-binding protein PbpA	Involved in peptidoglycan synthesis (at the final stages). Cell wall formation; PBPA is supposed to be responsible for the determination of the rod shape of the cell. It synthesizes cross-linked peptidoglycan from lipid intermediates.	P9WKD1	Rv0016c	Mb0016c	cell wall and cell processes	51.575	25	67.2	0	252.75	24.1444	23.674	25.4483	23.4988	25.5302	23.4164	24.2027	23.5752	23.4188	23.6662	23.5398	24.3219	0.423994	0.579629	0.156311	0.305847	0.117939	-0.110401
Rv0044c	Possible oxidoreductase	Function unknown; probably involved in cellular metabolism.	P71701	Rv0044c	Mb0045c	intermediary metabolism and respiration	28.524	13	50.4	0	133.03	29.4466	29.5343	29.465	29.5092	27.9761	29.5534	29.4328	29.5711	29.4602	29.5222	29.3183	29.7103	0.108686	-0.0349763	0.402251	-0.504069	0.0848615	-0.0289357
Rv1144	Probable short-chain type dehydrogenase/reductase	Function unknown; supposedly involved in cellular metabolism.	P9WGQ7	Rv1144	Mb1176	intermediary metabolism and respiration	25.787	17	83.2	0	302.66	29.1459	29.7393	29.687	29.538	29.6196	29.6844	29.741	29.7691	29.6483	29.8097	29.4814	29.6519	0.228292	-0.12363	0.118155	-0.0336933	0.285022	0.0717831
Rv3493c	Conserved hypothetical Mce associated alanine and valine rich protein	Unknown	I6X7G4	Rv3493c	Mb3523c	conserved hypotheticals	25.611	9	48.3	0	66.268	24.467	23.2107	23.112	23.3859	23.6256	23.3259	23.2219	24.1153	23.5692	22.7824	24.3137	23.3641	0.0610815	0.109868	0.030255	-0.0409457	0.103664	0.148755
celA1	Possible cellulase CelA1 (endoglucanase) (endo-1,4-beta-glucanase) (FI-cmcase) (carboxymethyl cellulase)	The biological conversion of cellulose to glucose generally requires three types of hydrolytic enzymes: (1) endoglucanases which cut internal beta-1,4-glucosidic bonds; (2) exocellobiohydrolases that cut the dissaccharide cellobiose from the nonreducing end of the cellulose polymer chain; (3) beta-1,4-glucosidases which hydrolyze the cellobiose and other short cello-oligosaccharides to glucose [c…	Q79G13	Rv0062	Mb0063	intermediary metabolism and respiration	39.973	6	27.6	0	34.346	24.6104	24.3464	25.3373	23.7421	24.4536	24.0129	25.1385	24.6038	24.0369	24.3739	23.7578	25.1087	0.289712	0.351254	0.318728	-0.343934	0.131133	0.179606
acsA	Acetyl-coenzyme A synthetase Acs (acetate--CoA ligase) (acetyl-CoA synthetase) (acetyl-CoA synthase) (acyl-activating enzyme) (acetate thiokinase) (acetyl-activating enzyme) (acetate--coenzyme A ligase) (acetyl-coenzyme A synthase)	Activates acetate to acetyl-coenzyme A [catalytic activity: ATP + acetate + CoA = AMP + pyrophosphate + acetyl-CoA].	P9WQD1	Rv3667	Mb3691	lipid metabolism	71.475	26	57	0	121.29	27.9444	27.936	27.8716	28.435	23.1513	28.3219	28.192	27.9957	28.1632	23.9054	28.0491	27.9365	0.399543	1.287	0.000839996	0.00569979	0.472262	1.48664
Rv1156	Conserved protein	Function unknown	O06554	Rv1156	Mb1187	conserved hypotheticals	20.872	7	56.4	0	18.362	26.1851	24.0281	23.5767	26.056	24.5249	24.8902	26.525	25.7063	26.3032	26.3209	25.7666	26.4351	0.8846	-1.5776	0.940718	-1.01721	0.00398533	0.00389735
Rv0067c	Possible transcriptional regulatory protein (possibly TetR-family)	Possibly involved in transcriptional mechanism.	O53612	Rv0067c	Mb0068c	regulatory proteins	20.403	4	24.9	0	8.1961	24.1185	23.6043	23.9507	23.6301	24.0809	23.3602	23.5415	24.362	24.2889	23.5633	23.5539	23.9058	0.496574	0.21686	0.0223651	0.0160764	0.610144	0.389814
Rv3677c	Possible hydrolase	Function unknown; probably involved in cellular metabolism.	I6XHY3	Rv3677c	Mb3701c	intermediary metabolism and respiration	28.49	5	34.5	0	20.725	24.0315	23.4417	24.9454	23.6224	24.0125	25.1987	25.0857	22.5954	25.5709	25.1583	23.3093	25.3035	0.2271	-0.450829	0.14552	-0.312515	0.0530511	-0.173056
lpqW	Probable conserved lipoprotein LpqW	Unknown	P9WGU7	Rv1166	Mb1198	cell wall and cell processes	66.129	21	49	0	197.99	23.8053	22.851	23.4238	24.5808	23.6413	23.8119	23.3033	24.1686	23.4822	23.3748	24.3943	24.1978	0.684992	-0.628955	0.0174329	0.0223344	0.341784	-0.337635
Rv0077c	Probable oxidoreductase	Function unknown; probably involved in cellular metabolism.	O53622	Rv0077c	Mb0079c	intermediary metabolism and respiration	29.686	14	46	0	120.8	23.9899	22.9459	22.9433	24.0696	23.8497	23.655	23.781	25.1694	23.0815	23.5636	23.0514	23.4939	0.0698215	-0.0765794	1.14776	0.488503	0.432606	0.640996
Rv3691	Conserved protein	Function unknown	O69659	Rv3691	Mb3716	conserved hypotheticals	35.492	4	13.5	0	7.4906	22.9922	23.4964	24.076	23.226	24.5259	24.3244	24.3945	23.7686	23.8726	22.8734	24.1411	24.2714	0.166332	-0.240423	0.1649	0.263447	0.19775	0.249942
fdxC	Probable ferredoxin FdxC	Ferredoxins are iron-sulfur proteins that transfer electrons in a wide variety of metabolic reactions.	O50433	Rv1177	Mb1210	intermediary metabolism and respiration	11.839	6	47.2	0	117.56	28.1288	28.1103	28.0562	28.5579	29.2301	27.7858	28.075	28.1789	27.8394	27.6889	26.8008	28.1294	0.644823	0.558701	0.795866	0.984884	0.537378	0.491375
hycP	Possible hydrogenase HycP	Involved in hydrogen metabolism.	P9WM75	Rv0085	Mb0088	intermediary metabolism and respiration	23.042	4	20	0	29.631	24.2979	25.3873	23.1009	23.6349	24.3318	24.2482	24.8818	24.1248	25.7159	23.3372	23.6791	24.3204	0.268267	0.483134	0.333055	0.292761	0.975009	1.12861
glpK	Probable glycerol kinase GlpK (ATP:glycerol 3-phosphotransferase) (glycerokinase) (GK)	Acts in rate-limiting step in glycerol utilization. Key enzyme in the regulation of glycerol uptake and metabolism [catalytic activity: ATP + glycerol = ADP + glycerol 3-phosphate].	P9WPK1	Rv3696c	Mb3721c,Mb3722c	intermediary metabolism and respiration	55.888	21	52.1	0	323.31	29.1602	29.1344	29.1798	28.8574	29.317	29.0518	29.1222	29.2845	29.3243	29.8455	29.0769	29.1298	0.317844	-0.192631	0.416537	-0.275313	0.157043	-0.107098
cysG	Possible multifunctional enzyme siroheme synthase CysG: uroporphyrin-III C-methyltransferase (urogen III methylase) (SUMT) (uroporphyrinogen III methylase) (UROM) + precorrin-2 oxidase + ferrochelatase	Involved in the biosynthesis of siroheme and cobalamin [catalytic activity: 2 S-adenosyl-L-methionine + uroporphyrin III = 2 S-adenosyl-L-homocysteine + sirohydrochlorin]. SAM-dependent methyl transferase that methylates uroporphyrinogen III at position C-2 and C-7 to form precorrin-2 and then position C-12 or C-18 to form trimethylpyrrocorphin 2. It catalyzes also the conversion of precorrin-2 i…	I6X5I7	Rv2847c	Mb2872c	intermediary metabolism and respiration	41.97	12	49.1	0	55.943	26.6919	26.1973	26.2745	26.2134	24.1507	26.297	26.3408	26.3132	26.5955	26.5978	25.662	26.0734	0.372497	0.27683	0.301121	-0.557384	0.462623	0.305429
ltp3	Probable lipid carrier protein or keto acyl-CoA thiolase Ltp3	Function unknown; probably involved in lipid metabolism.	I6YGD8	Rv3523	Mb3553	lipid metabolism	41.421	15	50	0	182.29	26.6796	26.8038	26.9231	26.6317	27.0512	26.57	26.55	26.9086	27.0418	27.2725	26.5842	26.8145	0.153968	-0.0882149	0.214395	-0.139376	0.0803655	-0.0569102
Rv3528c	Unknown protein	Unknown	I6YGE4	Rv3528c	Mb3558c	conserved hypotheticals	27.44	11	49.8	0	45.371	24.5873	23.2812	24.5678	23.4398	24.3087	25.4311	25.1036	23.8014	23.1617	24.7672	25.0165	25.7086	0.922679	-1.01867	0.529081	-0.770893	0.831193	-1.14184
ask	Aspartokinase Ask (aspartate kinase) [contains: aspartokinase alpha subunit (Ask-alpha); and aspartokinase beta subunit (Ask-beta)]	Involved at the first step in the common biosynthetic pathway leading from asp to the cell wall precursor MESO-diaminopimelate, to LYS, to met, to ILE and to THR [catalytic activity: ATP + L-aspartate = ADP + 4-phospho-L-aspartate]. Possibly acts in tetramer configuration, tetramer consisting of two alpha (catalytic activity) and two beta (function not known) chains.	P9WPX3	Rv3709c	Mb3736c	intermediary metabolism and respiration	44.461	19	61.5	0	240.59	28.4619	27.862	27.9821	28.2213	25.7762	27.4488	27.8757	27.7386	27.6579	25.8106	26.2756	28.1114	0.878542	1.36946	0.154569	0.416262	0.657922	1.02487
map	Methionine aminopeptidase MapB (map) (peptidase M)	Removes the amino-terminal methionine from nascent proteins [catalytic activity: L-methionylpeptide + H(2)O = L-methionine + peptide].	P9WK19	Rv2861c	Mb2886c	intermediary metabolism and respiration	30.891	9	39.3	0	52.321	29.3481	29.545	29.6312	29.5786	29.5242	29.2789	29.3799	29.4413	29.575	30.1011	28.85	29.4388	0.0410896	0.0447852	0.00243453	-0.00277964	0.00186591	0.00209173
treS	Trehalose synthase TreS	Involved in trehalose biosynthesis (protective effect). Converts maltose to trehalose. Mycobacteria can produce trehalose from glucose 6-phosphate and UDP-glucose (the OtsA-OtsB pathway) from glycogen-like alpha(1-->4)-linked glucose polymers (the TreY-TreZ pathway) and from maltose (the TreS pathway).	P9WQ19	Rv0126	Mb0131	virulence, detoxification, adaptation	68.592	32	67.2	0	311.76	29.8375	29.7606	29.6616	29.9117	29.2458	29.8737	29.7321	29.7045	29.9273	29.3475	30.2936	29.6312	0.00477954	-0.00415802	0.0801232	-0.0803337	0.0358045	0.0305614
cyp125	Probable cytochrome P450 125 Cyp125	Cytochromes P450 are a group of heme-thiolate monooxygenases. They oxidize a variety of structurally unrelated compounds, including steroids, fatty acids, and xenobiotics.	P9WPP1	Rv3545c	Mb3575c	intermediary metabolism and respiration	48.432	10	33.3	0	12.345	23.1922	22.8441	25.76	22.9304	23.6798	23.3334	25.3245	25.2857	24.675	23.7228	22.4866	25.4436	0.0125556	0.0477829	0.25613	-0.569797	0.615921	1.21076
Rv3726	Possible dehydrogenase	Function unknown; probably involved in cellular metabolism.	O69693	Rv3726	Mb3753	intermediary metabolism and respiration	41.966	7	28.2	0	23.924	23.7469	23.3258	23.9664	23.8902	23.7634	23.1421	23.7859	23.4068	24.2019	24.8406	23.0746	23.7941	0.152761	-0.223366	0.209771	-0.304536	0.0649869	-0.104853
amiC	Probable amidase AmiC (aminohydrolase)	Hydrolyzes a monocarboxylic acid amide and generates a monocarboxylate [catalytic activity: a monocarboxylic acid amide + H(2)O = a monocarboxylate + NH(3)].	P9WQ95	Rv2888c	Mb2912c	intermediary metabolism and respiration	50.915	21	67.7	0	302.12	28.6445	28.5348	28.5045	28.6439	27.9364	28.8527	29.053	28.7362	28.7507	28.1199	28.5402	28.6519	0.300737	0.123942	0.0428058	0.0403213	0.999473	0.409313
viuB	Possible mycobactin utilization protein ViuB	Thought to be involved in intracellular removal of iron from iron-mycobactin complex. Mycobactin is an iron-chelating compound involved in the transport of iron from the bacterial environment into the cell cytoplasm.	P9WL31	Rv2895c	Mb2919c	intermediary metabolism and respiration	30.602	18	71.4	0	275.26	29.9908	30.0682	30.1978	30.2903	30.2599	30.0417	30.2397	30.324	30.2681	30.4322	29.9646	30.4129	0.488616	-0.18431	0.158547	-0.0725854	0.0157791	0.00736555
echA20	Probable enoyl-CoA hydratase EchA20 (enoyl hydrase) (unsaturated acyl-CoA hydratase) (crotonase)	Could possibly oxidize fatty acids using specific components [catalytic activity: (3S)-3-hydroxyacyl-CoA = trans-2(or 3)-enoyl-CoA + H(2)O].	I6Y3U6	Rv3550	Mb3580	lipid metabolism	26.333	9	50.2	0	32.397	26.2033	25.9378	26.0862	26.0301	23.2891	25.6939	25.8768	26.2516	25.8291	26.0943	25.919	26.2509	0.0338109	-0.0122935	0.55262	-1.08366	0.245803	-0.102222
Rv2901c	Conserved protein	Function unknown	P9WL27	Rv2901c	Mb2925c	conserved hypotheticals	12.226	13	93.1	0	74.041	26.6753	26.5207	26.7138	26.8042	26.8614	27.1534	26.8764	26.4518	26.7242	26.9339	27.2034	26.8513	1.38014	-0.359577	0.137766	-0.0565497	0.889688	-0.312056
Rv0144	Probable transcriptional regulatory protein (possibly TetR-family)	Involved in transcriptional mechanism.	P96821	Rv0144	Mb0149	regulatory proteins	30.643	8	35.7	0	199.88	23.1357	22.9003	24.6428	24.817	23.9444	25.8743	24.3853	22.5752	22.9225	24.5417	24.5712	23.7458	0.524574	-0.726635	0.405035	0.592307	0.737071	-0.991901
sugC	Probable sugar-transport ATP-binding protein ABC transporter SugC	Involved in active transport of sugar across the membrane (import). Responsible for energy coupling to the transport system.	P9WQI3	Rv1238	Mb1270	cell wall and cell processes	42.915	9	29	0	16.953	24.9366	24.7146	24.896	24.7716	22.7438	24.9105	24.857	24.9059	24.9822	24.4632	24.5299	24.9881	0.45565	0.188646	0.291564	-0.518415	0.685666	0.254637
lpqZ	Probable lipoprotein LpqZ	Unknown	O50459	Rv1244	Mb1276	cell wall and cell processes	29.602	12	71.7	0	209.29	23.6603	23.2396	24.9155	23.391	25.2984	23.772	24.0438	23.2657	23.9784	23.6938	22.8679	23.842	0.32968	0.470563	0.44937	0.685898	0.306031	0.294758
fadE30	Probable acyl-CoA dehydrogenase FadE30	Function unknown, but involved in lipid degradation.	I6Y3V5	Rv3560c	Mb3590c	lipid metabolism	42.732	8	23.4	0	21.54	22.5535	23.8128	24.4882	23.3323	23.857	24.365	24.2306	24.0343	23.2969	23.6859	24.8751	24.8752	0.550638	-0.860529	0.561201	-0.627267	0.569516	-0.624797
pntAb	Probable NAD(P) transhydrogenase (subunit alpha) PntAb [second part; integral membrane protein] (pyridine nucleotide transhydrogenase subunit alpha) (nicotinamide nucleotide transhydrogenase subunit alpha)	The transhydrogenation between NADH and NADP is coupled to respiration and ATP hydrolysis and functions as a proton pump across the membrane [catalytic activity: NADPH + NAD+ = NADP+ + NADH].	P96833	Rv0156	Mb0161	intermediary metabolism and respiration	11.782	2	13.6	0	124.77	25.9932	26.0434	25.9999	25.7117	23.8676	23.0153	25.8108	25.7356	25.9256	26.1504	26.0986	26.0874	1.79307	-0.0999724	1.13078	-1.91391	2.10099	-0.288091
aspB	Possible aspartate aminotransferase AspB (transaminase A) (ASPAT) (glutamic--oxaloacetic transaminase) (glutamic--aspartic transaminase)	Thought to be involved in glutamate biosynthesis [catalytic activity: L-aspartate + 2-oxoglutarate = oxaloacetate + L-glutamate].	P96847	Rv3565	Mb3595	intermediary metabolism and respiration	41.08	5	24.7	0	23.152	25.6508	23.1638	25.3906	25.5779	26.0794	23.914	24.4482	24.1303	25.4753	25.9381	25.3175	23.1565	0.0198793	-0.0689405	0.133348	0.386406	0.0435516	-0.119436
smc	Probable chromosome partition protein Smc	Plays an important role in chromosome structure and partitioning. Essential for chromosome partition.	P9WGF3	Rv2922c	Mb2946c	cell wall and cell processes	130.64	14	12.4	0	25.852	23.4798	24.5027	23.3118	24.1587	23.2352	23.6435	23.1341	24.536	23.4222	23.9246	23.2927	23.0347	0.310663	0.347404	0.280316	0.261794	0.216791	0.280103
Rv0161	Possible oxidoreductase	Function unknown; probably involved in cellular metabolism.	O07406	Rv0161	Mb0166	intermediary metabolism and respiration	47.355	25	74.4	0	323.31	29.6443	29.7261	29.5831	29.2578	29.6607	29.3596	29.2484	29.5666	29.5159	29.9254	29.614	29.52	0.097691	-0.0352637	0.68851	-0.260416	0.704407	-0.242858
hsaD	4,9-DHSA hydrolase	Catalyzes the hydrolysis of 4,5-9,10-diseco-3-hydroxy-5,9,17-trioxoandrosta-1(10),2-diene-4-OIC acid (4,9-DHSA)	P9WNH5	Rv3569c	Mb3600c	intermediary metabolism and respiration	31.875	24	79.7	0	275.36	28.1796	28.2598	28.1621	28.3075	28.6011	27.7791	27.8439	28.1854	27.9106	28.8152	27.404	28.0933	0.083456	0.0963294	0.0944339	0.125066	0.106542	-0.12421
Rv3753c	Conserved protein	Function unknown	O69720	Rv3753c	Mb3779c	conserved hypotheticals	18.589	3	22	0	17.096	25.5331	23.3546	24.8405	23.1064	25.1577	23.5958	22.5639	25.7674	23.5275	25.8312	23.0593	25.2315	0.0422425	-0.131319	0.292108	-0.754083	0.233537	-0.754429
tesA	Probable thioesterase TesA	Probably involved in biosynthesis of phthiocerol dimycocerosate (PDIM)	P9WQD5	Rv2928	Mb2953	lipid metabolism	29.151	13	61.3	0	51.725	26.3033	23.2885	23.6918	26.2876	22.9239	26.389	26.346	23.4523	26.271	25.9944	26.2639	26.3458	0.867755	-1.77348	0.365851	-1.00122	0.368863	-0.844924
Rv1261c	Conserved protein	Function unknown	P9WP13	Rv1261c	Mb1292c	conserved hypotheticals	16.756	14	78.5	0	92.53	24.8836	24.1196	22.0614	23.9023	24.4052	24.8324	23.3678	24.0277	24.0376	23.9121	23.3761	22.8477	0.126473	0.309631	1.15348	1.00139	0.498356	0.432405
mce1C	Mce-family protein Mce1C	Unknown, but thought to be involved in host cell invasion.	O07415	Rv0171	Mb0177	virulence, detoxification, adaptation	53.803	24	50.9	0	139.15	24.1588	24.6582	25.3954	23.4486	25.6137	24.3597	23.5994	23.75	24.3633	26.5721	23.2937	22.8251	0.153833	0.507182	0.0634465	0.243683	0.0971613	-0.32608
proV	Possible osmoprotectant (glycine betaine/carnitine/choline/L-proline) transport ATP-binding protein ABC transporter ProV	Thought to be involved in active transport of osmoprotectant (glycine betaine/carnitine/choline/L-proline) across the membrane (import). Responsible for energy coupling to the transport system.	O69724	Rv3758c	Mb3784c	virulence, detoxification, adaptation	39.57	7	34.8	0	64.477	23.5901	22.8021	23.8361	23.0214	23.2601	23.2307	23.4588	24.1235	25.2185	23.8715	23.3503	23.1166	0.0322792	-0.0366923	0.512798	-0.275416	0.665084	0.820782
ppsC	Phenolpthiocerol synthesis type-I polyketide synthase PpsC	Involved in phenolpthiocerol and phthiocerol dimycocerosate (dim) biosynthesis: extension with malony CoA (complete reduction).	P96202	Rv2933	Mb2958	lipid metabolism	230.62	53	38.2	0	323.31	28.0919	26.085	26.6309	22.5749	24.2906	28.4091	28.2634	26.5182	27.7096	26.2069	28.6211	28.9999	0.402156	-1.00667	0.666509	-2.85108	0.165355	-0.445557
pknH	Probable transmembrane serine/threonine-protein kinase H PknH (protein kinase H) (STPK H)	Involved in signal transduction (via phosphorylation). Thought to be involved in arabinan metabolism, phosphorylating perhaps EMBR|Rv1267c [catalytic activity: ATP + a protein = ADP + a phosphoprotein].	P9WI71	Rv1266c	Mb1297c	regulatory proteins	63.73	26	51.2	0	220.36	24.3108	24.7855	22.5738	22.9067	23.3745	24.0819	23.6773	23.2306	23.656	23.521	23.4126	22.8119	0.381081	0.641489	0.194275	0.205826	0.44347	0.272755
carD	Possible transcription factor	Involved in transcriptional mechanism.	P9WJG3	Rv3583c	Mb3614c	regulatory proteins	17.907	19	89.5	0	177.66	30.1111	29.9365	29.6885	30.313	30.5204	29.3287	29.8199	29.8872	29.5261	30.3735	29.4925	30.0729	0.0836221	-0.0676022	0.0572365	0.0744095	0.346708	-0.23525
Rv0176	Probable conserved Mce associated transmembrane protein	Unknown	O07420	Rv0176	Mb0182	cell wall and cell processes	35.437	12	50.6	0	35.639	24.1468	23.2771	24.8444	24.0205	24.4953	23.9817	23.854	23.7253	23.2677	24.2625	23.4156	25.3201	0.124804	-0.24332	0.104544	-0.16692	0.547888	-0.717056
drrC	Probable daunorubicin-dim-transport integral membrane protein ABC transporter DrrC	Probably involved in active transport of antibiotic and phthiocerol dimycocerosate (dim) across the membrane (export). DRRA|Rv2934|MTCY19H9.04, DRRB|Rv2937|MTCY19H9.05 and DRRC may act jointly to confer daunorubicin and doxorubicin resistance by an export mechanism. Probably responsible for the translocation of the substrate across the membrane and localization of dim into the cell wall.	P9WG21	Rv2938	Mb2963	cell wall and cell processes	29.593	6	18.5	0	66.107	23.1963	23.24	25.3899	24.2745	24.33	24.3211	23.084	24.2526	23.0362	23.988	23.8106	22.8827	0.181348	0.381623	1.02348	0.748088	0.068446	-0.102888
lpqH	19 kDa lipoprotein antigen precursor LpqH	Shown to inhibit gamma interferon regulated HLA-DR protein and mRNA expression in human macrophages	P9WK61	Rv3763	Mb3789	cell wall and cell processes	15.147	5	79.9	0	323.31	23.5528	24.1734	22.6327	24.6823	23.5819	23.9661	22.5031	24.5215	24.6024	23.8531	23.5238	24.2024	0.34499	-0.406812	0.224788	0.217032	0.00730909	0.0158914
fadD29	Fatty-acid-AMP ligase FadD29 (fatty-acid-AMP synthetase) (fatty-acid-AMP synthase)	Involved in biosynthesis of phenolic glycolipids (PGLs)	P95141	Rv2950c	Mb2974c	lipid metabolism	67.476	34	58.6	0	323.31	29.582	29.8612	30.4872	28.5116	24.8226	29.2611	30.5321	30.3762	30.2803	26.7238	30.1077	30.271	0.326552	0.942664	0.347312	-1.50238	0.515826	1.36204
ftsH	Membrane-bound protease FtsH (cell division protein)	Thought to act as an ATP-dependent zinc metallopeptidase, with ATPase and proteolytic activities. Probably has a regulatory role in stress response and specific proteins secretion for adaptation to host environment.	P9WQN3	Rv3610c	Mb3640c	cell wall and cell processes	81.985	33	60	0	323.31	24.2266	22.986	24.2169	23.2642	23.7307	23.7597	24.2654	24.7175	24.3855	23.6192	24.9404	25.0748	0.520002	-0.734955	0.912001	-0.95995	0.0637597	-0.0886803
Rv3777	Probable oxidoreductase	Function unknown; probably involved in cellular metabolism.	P72043	Rv3777	Mb3806	intermediary metabolism and respiration	33.963	11	48.5	0	57.539	27.3893	27.4242	27.7896	27.7198	27.4868	27.7189	27.6298	27.6141	27.7327	27.9785	27.3898	27.7302	0.316855	-0.165129	0.111418	-0.0576617	0.0823142	-0.0406602
Rv1287	Conserved hypothetical protein	Function unknown	P9WME3	Rv1287	Mb1318	conserved hypotheticals	17.209	10	75.2	0	162.2	26.4378	23.8728	22.3584	23.966	24.9197	25.0206	22.6391	25.6975	22.3406	24.6401	26.3424	26.5549	0.535721	-1.62282	0.808076	-1.21042	0.863233	-2.28678
espC	ESX-1 secretion-associated protein EspC	Function unknown	P9WJD7	Rv3615c	Mb3645c	cell wall and cell processes	10.795	4	27.2	0	19.101	24.7284	23.3935	23.7573	23.9034	22.6068	24.6754	22.9799	24.3084	23.9236	23.8659	24.4163	24.2	0.177787	-0.200996	0.278279	-0.43222	0.424383	-0.42345
Rv0207c	Conserved hypothetical protein	Function unknown	P96389	Rv0207c	Mb0213c	conserved hypotheticals	26.175	10	87.6	0	117.75	24.1073	22.7383	24.268	24.1391	24.2745	23.4162	23.258	23.9718	23.8659	24.1334	23.4816	23.9727	0.109142	-0.158017	0.0865754	0.0806986	0.214946	-0.163991
rho	Probable transcription termination factor Rho homolog	Facilitates transcription termination by a mechanism that involves rho binding to the nascent RNA, activation of rho'S RNA-dependent ATPase activity, and release of the mRNA from the DNA template	P9WHF3	Rv1297	Mb1329	information pathways	65.133	22	44.2	0	187.62	27.863	26.7515	27.0519	27.7737	27.8975	27.722	27.7862	27.1129	27.3967	27.6858	27.5896	27.7713	0.614715	-0.460133	0.713437	0.11546	0.547904	-0.250327
Rv3626c	Conserved hypothetical protein	Function unknown	O06381	Rv3626c	Mb3650c	conserved hypotheticals	38.439	7	24	0	9.4156	23.4095	24.1138	23.3507	23.2885	25.0897	23.4917	23.0082	23.381	23.6903	24.7497	22.8514	24.037	0.157609	-0.254671	0.032832	0.0772622	0.36996	-0.51953
Rv3788	Hypothetical protein	Unknown	P9WKW7	Rv3788	Mb3817	conserved hypotheticals	17.406	14	84.5	0	235.72	28.5994	28.8725	28.4071	28.555	29.1923	28.2548	28.2846	28.8398	28.2612	28.4959	28.1705	28.1529	0.943609	0.35324	0.590936	0.394253	0.358169	0.188748
atpB	Probable ATP synthase a chain AtpB (protein 6)	Key component of the proton channel; it may play a direct role in the translocation of protons (H+) across the membrane	P9WPV7	Rv1304	Mb1336	intermediary metabolism and respiration	27.466	9	30.8	0	71.842	22.7242	23.386	24.2663	23.9329	23.7539	23.1134	23.2558	23.7679	22.1432	23.8594	23.7845	23.5728	0.243049	-0.280027	0.203613	-0.138809	0.631891	-0.683259
embC	Integral membrane indolylacetylinositol arabinosyltransferase EmbC (arabinosylindolylacetylinositol synthase)	Involved in the biosynthesis of the mycobacterial cell wall arabinan and resistance to ethambutol (EMB; dextro-2,2'-(ethylenediimino)-DI-1-butanol). Polymerizes arabinose into the arabinan of arabiogalactan [catalytic activity: UDP-L-arabinose + indol-3-ylacetyl-myo-inositol = UDP + indol-3-ylacetyl-myo-inositol L-arabinoside].	P9WNL5	Rv3793	Mb3822	cell wall and cell processes	117.49	36	35	0	199.24	23.3326	24.5919	23.7565	23.057	23.3864	24.2835	23.1084	24.8001	24.009	24.492	22.6623	22.9692	0.314002	0.519172	0.107748	0.201117	0.329225	0.597997
murA	Probable UDP-N-acetylglucosamine 1-carboxyvinyltransferase MurA	Involved in cell wall formation; peptidoglycan biosynthesis. Adds enolpyruvyl to UDP-N-acetylglucosamine [catalytic activity: phosphoenolpyruvate + UDP-N-acetyl-D- glucosamine = phosphate + UDP-N-acetyl-3-O-(1-carboxyvinyl)-D-glucosamine]	P9WJM1	Rv1315	Mb1348	cell wall and cell processes	44.063	13	47.8	0	155.37	27.875	27.545	27.7249	26.7489	24.2278	27.79	27.9068	27.6389	27.8556	26.1139	27.8483	27.7023	0.365835	0.493427	0.333435	-0.965945	0.442793	0.578915
php	Probable phosphotriesterase Php (parathion hydrolase) (PTE) (aryldialkylphosphatase) (paraoxonase) (a-esterase) (aryltriphosphatase) (paraoxon hydrolase)	Enzymatic activity unknown [catalytic activity: aryl dialkyl phosphate + H2O = dialkyl phosphate + an aryl alcohol].	P9WHN9	Rv0230c	Mb0235c	lipid metabolism	35.9	10	46.6	0	112.8	26.3553	26.5704	26.5747	26.277	27.0926	26.3092	26.5301	26.5062	26.5901	27.0196	26.4309	26.4062	0.216749	-0.11877	0.0616335	-0.0592378	0.140699	-0.0767619
ilvH	Probable acetolactate synthase (small subunit) IlvN (acetohydroxy-acid synthase) (AHAS) (ALS)	Involved in valine and isoleucine biosynthesis (at the first step) [catalytic activity: 2-acetolactate + CO(2) = 2-pyruvate].	P9WKJ3	Rv3002c	Mb3027c	intermediary metabolism and respiration	18.187	7	48.8	0	28.516	24.6316	25.0053	23.6733	24.7479	25.4028	23.4431	24.4271	23.7932	24.1612	23.5621	23.1888	23.288	1.24248	1.09044	0.944855	1.18496	1.65509	0.780865
Rv1320c	Possible adenylate cyclase (ATP pyrophosphate-lyase) (adenylyl cyclase)	Thought to play an essential role in regulation of cellular metabolism by catalysing the synthesis of a second messenger, cAMP. May be involved in virulence [catalytic activity: ATP = 3',5'-cyclic AMP + pyrophosphate].	P9WQ29	Rv1320c	Mb1354c	intermediary metabolism and respiration	61.964	9	21.3	0	37.335	24.766	23.3888	24.5699	23.2522	24.0486	23.9246	23.5276	22.239	24.1731	23.4379	24.1808	23.6945	0.415225	0.470504	0.0298714	-0.0292619	0.306379	-0.457842
mpt51	Secreted MPT51/MPB51 antigen protein FbpD (MPT51/MPB51 antigen 85 complex C) (AG58C) (mycolyl transferase 85C) (fibronectin-binding protein C) (85C)	Involved in cell wall mycoloylation. Proteins of the antigen 85 complex are responsible for the high affinity of mycobacteria to fibronectin. Possesses a mycolyltransferase activity required for the biogenesis of trehalose dimycolate (cord factor), a dominant structure necessary for maintaining cell wall integrity.	P9WQN7	Rv3803c	Mb3833c	lipid metabolism	31.089	9	68.9	0	89.616	27.2635	27.3234	27.8699	26.4715	24.5217	24.3677	27.6738	28.1844	27.8859	26.9698	27.7166	27.9089	0.0457329	-0.0461922	1.51582	-2.41147	0.521881	0.38292
topA	DNA topoisomerase I TopA (omega-protein) (relaxing enzyme) (untwisting enzyme) (swivelase) (type I DNA topoisomerase) (nicking-closing enzyme) (TOPO I)	The reaction catalyzed by topoisomerases LEADS to the conversion of one topological isomer of DNA to another. [catalytic activity: ATP-independent breakage of single-stranded DNA, followed by passage and rejoining].	P9WG49	Rv3646c	Mb3670c	information pathways	102.37	32	51.3	0	140.33	27.8426	26.8876	23.9393	27.1005	27.5291	26.9628	27.2768	26.8012	27.0386	28.8525	27.9151	27.3477	0.655024	-1.81523	0.828164	-0.840962	1.02065	-0.999534
Rv1324	Possible thioredoxin	Thioredoxin participates in various redox reactions through the reversible oxidation of its active center dithiol, to a disulfide, & catalyzes dithiol-disulfide exchange reactions	P9WG61	Rv1324	Mb1359	intermediary metabolism and respiration	32.17	20	77.6	0	323.31	30.4929	30.3596	30.3739	30.6665	30.8268	30.4566	30.5226	30.5498	30.5814	30.5917	30.5223	30.5782	1.51781	-0.155313	0.322534	0.0858905	0.179693	-0.0128485
htdX	Probable 3-hydroxyacyl-thioester dehydratase HtdX	Involved in fatty acid synthesis type II (fas-II)	O53664	Rv0241c	Mb0247c	intermediary metabolism and respiration	30.195	9	44.6	0	67.673	26.0969	25.5388	25.9513	25.9717	24.3615	26.4473	26.4447	25.97	26.1402	26.6353	26.1587	26.7145	1.24783	-0.640498	0.625099	-0.909371	0.645954	-0.317859
glf	UDP-galactopyranose mutase Glf (UDP-GALP mutase) (NAD+-flavin adenine dinucleotide-requiring enzyme)	Involved in lipopolysaccharide biosynthesis, in the conversion of UDP-galactopyranose into UDP-galactofuranose through a 2-keto intermediate [catalytic activity: UDP-D-galactopyranose = UDP-D-galacto-1,4-furanose].	P9WIQ1	Rv3809c	Mb3839c	cell wall and cell processes	45.814	26	77.9	0	323.31	29.9067	30.2295	30.272	29.9578	29.2339	30.1898	30.125	30.1061	30.4688	29.9654	29.9655	30.1948	0.27274	0.0941359	0.34515	-0.248107	0.61112	0.191364
Rv3651	Conserved hypothetical protein	Function unknown	I6YCP0	Rv3651	Mb3675	conserved hypotheticals	37.967	8	33	0	96.676	24.7982	24.5634	24.705	23.9108	24.3114	24.4006	25.0662	24.2122	24.3794	24.4239	24.2244	24.7336	0.630406	0.228261	0.527085	-0.253027	0.110882	0.091994
hsp	Heat shock protein Hsp (heat-stress-induced ribosome-binding protein A)	Thought to be involved in the initiation step of translation at high temperature. Bound to 30S ribosomal subunit. Possibly a molecular chaperone. Seems to be regulated positively by SIGE|Rv1221 and negatively by HSPR|Rv0353.	O53673	Rv0251c	Mb0257c	virulence, detoxification, adaptation	17.786	7	71.7	0	51.875	23.3521	23.4518	23.4827	24.5736	23.7469	24.1066	22.7844	23.9125	23.2252	22.9401	24.8349	25.1836	0.566878	-0.890636	0.0852111	-0.17716	0.586341	-1.01216
cysM	Cysteine synthase B CysM (CSASE B) (O-phosphoserine sulfhydrylase B) (O-phosphoserine (thiol)-lyase B)	Involved in cysteine biosynthesis [catalytic activity: O-phospho-L-serine + H(2)S = L-cysteine + phosphate]	P9WP53	Rv1336	Mb1371	intermediary metabolism and respiration	34.438	14	66.6	0	101.15	27.3342	27.9158	27.612	27.7083	27.8216	27.7191	27.5327	27.2957	27.6899	27.9621	27.4688	27.6682	0.131642	-0.079003	0.123709	0.0499872	0.454954	-0.1936
Rv3819	Unknown protein	Unknown	O07804	Rv3819	Mb3849	conserved hypotheticals	12.825	17	100	0	212.13	22.7043	23.8675	23.7075	23.2768	23.5459	24.466	23.3993	23.9261	24.1866	24.5357	23.3439	23.9996	0.459255	-0.533319	0.146905	-0.196859	0.106354	-0.122414
Rv3661	Conserved hypothetical protein	Possibly plays a regulatory role in celular differentiation.	P9WGJ1	Rv3661	Mb3685	virulence, detoxification, adaptation	30.721	8	54	0	56.439	25.1032	23.5911	24.6005	23.4091	24.8684	23.6544	24.228	24.6412	24.1805	24.3141	24.1391	22.9678	0.436343	0.624599	0.0987421	0.170264	0.535266	0.542871
dppA	Probable periplasmic dipeptide-binding lipoprotein DppA	Thought to be involved in active transport of dipeptide across the membrane (import).	I6X811	Rv3666c	Mb3690c	cell wall and cell processes	58.381	17	44	0	96.305	23.3775	23.7191	23.2814	23.5265	24.9812	24.6449	24.7124	24.0998	23.6558	23.4542	23.7701	24.0745	0.618691	-0.306948	0.580111	0.617938	0.476617	0.389721
Rv3671c	Membrane-associated serine protease	Function unknown; hydrolyses of peptides and/or proteins (possibly cleaved preferentially after serine residue).	P9WHR9	Rv3671c	Mb3695c	intermediary metabolism and respiration	40.66	10	34.8	0	301.43	24.3355	23.2808	25.0738	23.9543	23.8949	25.0509	23.9345	23.3832	23.5735	23.4394	23.919	23.8618	0.379954	0.490023	0.621522	0.560004	0.189534	-0.109658
Rv3832c	Conserved protein	Function unknown	P96246	Rv3832c	Mb3862c	conserved hypotheticals	20.767	4	38.2	0	15.662	24.4811	23.4805	23.8766	23.0938	24.1825	25.1524	23.7234	24.996	23.6407	23.7228	24.4102	22.8996	0.196688	0.268525	0.249926	0.465326	0.288907	0.442509
Rv0272c	Unknown protein	Unknown	P95229	Rv0272c	Mb0278c	conserved hypotheticals	41.077	14	44.8	0	42.018	25.9163	25.7139	25.688	25.8309	26.0944	25.7221	25.5765	25.7661	25.6996	26.4293	25.298	26.3744	0.280003	-0.261161	0.146414	-0.15142	0.401512	-0.353143
TB22.2	Probable conserved secreted protein TB22.2	Unknown	I6YF08	Rv3036c	Mb3062c	cell wall and cell processes	24.406	3	22.5	0	2.558	23.8257	23.1456	24.9958	24.1675	23.8982	24.081	22.4976	25.0043	24.4917	23.4987	24.9322	23.0663	0.0701614	0.156637	0.140773	0.216485	0.0603681	0.165426
Rv1363c	Possible membrane protein	Function unknown	P9WLZ9	Rv1363c	Mb1398c	cell wall and cell processes	28.308	7	44.4	0	212.88	23.5143	24.129	24.7649	24.9125	23.4261	24.9468	23.6929	23.8708	22.8629	23.4102	23.9211	23.3743	0.636803	0.567518	0.742442	0.859969	0.0928316	-0.0929642
lprF	Probable conserved lipoprotein LprF	Unknown	P9WK47	Rv1368	Mb1403	cell wall and cell processes	26.851	12	70.5	0	323.31	23.4266	23.0672	23.9446	23.1515	23.2987	23.5376	23.919	23.4528	23.8688	22.373	24.0625	23.3622	0.143457	0.213556	0.0429287	0.0633094	0.397263	0.480954
Rv3856c	Conserved hypothetical protein	Function unknown	P96221	Rv3856c	Mb3886c	conserved hypotheticals	36.701	8	35.8	0	112.15	25.2631	24.812	25.4181	25.6526	23.3214	25.3672	25.392	25.0891	25.3536	25.9482	25.1123	25.7399	0.633274	-0.435719	0.455479	-0.819677	0.527229	-0.321854
mihF	Putative integration host factor MihF	Unknown	P71658	Rv1388	Mb1423	information pathways	20.835	15	35.8	0	323.31	32.2057	32.3647	32.324	32.3833	33.1502	32.5071	32.6268	32.3606	32.5334	32.3046	31.2183	31.9157	0.687241	0.48531	1.02618	0.86735	0.99482	0.694065
crp	Transcriptional regulatory protein Crp (Crp/Fnr-family)	Involved in transcriptional mechanism.	A0A0H3MA79	Rv3676	Mb3700	Regulatory proteins	24.774	3	17.4	0	61.558	26.2892	26.1517	26.2049	26.2704	24.9538	26.493	26.7048	26.5185	26.3509	26.1209	26.0645	26.6629	0.126877	-0.0674718	0.295771	-0.377015	0.486551	0.241954
lipI	Probable lipase LipH	Function unknown, but possibly involved in lipid metabolism	P71668	Rv1400c	Mb1435c	intermediary metabolism and respiration	34.052	12	64.4	0	109.51	23.48	24.7739	26.2442	24.005	25.7561	22.6625	26.9902	26.2934	24.9581	25.8884	23.2905	24.5718	0.0802705	0.249135	0.140157	-0.442347	0.714011	1.49702
serB2	Probable phosphoserine phosphatase SerB2 (PSP) (O-phosphoserine phosphohydrolase) (pspase)	Generates serine from phosphoserine [catalytic activity: phosphoserine + H(2)O = serine + phosphate].	O53289	Rv3042c	Mb3068c	intermediary metabolism and respiration	43.058	9	33	0	24.74	25.1549	22.4292	23.5049	24.7425	24.2549	24.9756	23.819	24.4918	23.1389	23.1544	24.9486	24.8315	0.247984	-0.615182	0.218344	0.346138	0.285754	-0.494947
mycP3	Probable membrane-anchored mycosin MycP3 (serine protease) (subtilisin-like protease) (subtilase-like) (mycosin-3)	Thought to have proteolytic activity.	O53695	Rv0291	Mb0299	intermediary metabolism and respiration	46.127	9	54.7	0	137.36	25.541	25.4355	23.7421	25.1159	25.2282	25.4595	25.6941	25.7875	25.8139	24.3615	23.5778	25.4729	0.210639	0.435433	0.643895	0.797097	1.10469	1.29439
ribE	Probable riboflavin synthase alpha chain RibC (RibE)	Involved in riboflavin synthesis. Riboflavin synthase is a bifunctional enzyme complex catalyzing the formation of riboflavin from 5-amino-6-(1'-D)- ribityl-amino-2,4(1H,3H)-pyrimidinedione and L-3,4-dihydrohy-2- butanone-4-phosphate via 6,7-dimethyl-8-lumazine. The alpha subunit catalyzes the dismutation of 6,7-dimethyl-8-lumazine to riboflavin and 5-amino-6-(1'-D)-ribityl-amino-2,4(1H,3H)- pyri…	P9WK35	Rv1412	Mb1447	intermediary metabolism and respiration	21.32	11	63.2	0	189.22	28.0228	28.055	28.1815	28.0238	27.7164	27.8835	28.0132	28.2121	27.8406	27.9965	27.9268	28.4188	0.0593596	-0.027619	0.604323	-0.239471	0.18769	-0.0920633
Rv3690	Probable conserved membrane protein	Unknown	O69658	Rv3690	Mb3715	cell wall and cell processes	23.751	7	42.4	0	47.747	22.5283	23.6424	23.7648	23.9745	22.6977	23.6067	24.3581	24.4735	22.9363	25.2237	23.485	24.7602	0.83835	-1.17781	0.759791	-1.06329	0.324678	-0.566991
lprH	Probable lipoprotein LprH	Unknown	P9WK43	Rv1418	Mb1453	cell wall and cell processes	24.287	3	18.4	0	3.0605	23.4841	23.0562	23.9734	22.6019	23.1752	23.094	24.0076	24.5412	22.156	23.9749	23.33	23.1146	0.0285026	0.0313975	0.754261	-0.516128	0.0422075	0.0950851
Rv3695	Possible conserved membrane protein	Unknown	O69663	Rv3695	Mb3720	cell wall and cell processes	33.167	5	31.3	0	14.009	23.665	23.5542	23.9613	23.9062	23.6829	24.8668	25.3941	23.1974	22.2795	23.7349	23.5642	22.6242	0.500161	0.419082	0.77637	0.84421	0.116442	0.3159
pgmA	Probable phosphoglucomutase PgmA (glucose phosphomutase) (PGM)	This enzyme participates in both the breakdown and synthesis of glucose [catalytic activity: alpha-D-glucose 1-phosphate = alpha-D-glucose 6-phosphate].	I6Y2G3	Rv3068c	Mb3095c	intermediary metabolism and respiration	58.265	26	68.9	0	210.83	28.877	29.0987	29.0389	28.8567	29.6079	29.0973	28.9895	28.7878	29.1472	29.6838	29.1096	29.1973	0.788451	-0.325399	0.192651	-0.142965	0.794239	-0.355403
Rv3699	Conserved protein	Function unknown	O69667	Rv3699	Mb3725	conserved hypotheticals	24.998	14	77.7	0	197.15	29.9975	29.6948	29.9457	29.6789	30.083	29.8403	29.9947	30.1087	29.9716	30.2719	29.8661	29.6867	0.11486	-0.0622171	0.130313	-0.0741736	0.177848	0.0834446
Rv1431	Conserved membrane protein	Unknown	O06827	Rv1431	Mb1466	cell wall and cell processes	65.308	9	23.6	0	70.365	22.8287	22.3631	23.8447	24.6154	24.1293	23.8994	23.9732	24.2263	22.8581	24.6587	24.117	24.0283	1.2296	-1.25581	0.0642129	-0.0532843	0.555808	-0.582114
hab	Probable hydroxylaminobenzene mutase Hab	Enzyme involved in the second step of nitrobenzene degradation: rearranged the intermediate hydroxylaminobenzene to 2-aminophenol.	I6Y2H3	Rv3078	Mb3105	intermediary metabolism and respiration	14.08	4	12	0	6.6224	21.4808	23.6024	23.3785	24.7654	24.1525	23.6371	22.9655	24.0493	24.1059	24.5743	23.4401	24.4769	0.813001	-1.34319	0.0144183	0.0212523	0.368092	-0.456853
gap	Probable glyceraldehyde 3-phosphate dehydrogenase Gap (GAPDH)	Involved in second phase of glycolysis (first step) [catalytic activity: D-glyceraldehyde 3-phosphate + phosphate + NAD(+) = 3-phospho-D-glyceroyl phosphate + NADH.]	P9WN83	Rv1436	Mb1471	intermediary metabolism and respiration	35.955	20	70.8	0	323.31	32.5161	32.6868	32.6693	32.6932	33.0349	32.5984	32.5918	32.6891	32.6955	33.073	32.3887	32.5418	0.0715631	-0.0437864	0.164709	0.107652	0.0142441	-0.00903956
tkt	Transketolase Tkt (TK)	This enzyme, together with transaldolase, provides a link between the glycolytic and pentose-phosphate pathways. It catalyzes the reversible transfer of a two-carbon KETOL unit from xylulose 5-phosphate to an aldose receptor [catalytic activity: sedoheptulose 7-phosphate + D-glyceraldehyde 3-phosphate = D-ribose 5-phosphate + D-xylulose 5-phosphate]	P9WG25	Rv1449c	Mb1484c	intermediary metabolism and respiration	75.54	40	73	0	323.31	32.8107	32.9378	32.7647	32.7917	33.4029	32.6883	32.6303	32.7987	32.7877	33.1593	32.7942	32.7464	0.167223	-0.0622063	0.0836503	0.0610352	0.497626	-0.161048
Rv1455	Conserved protein	Function unknown	O53147	Rv1455	Mb1490	conserved hypotheticals	31.426	10	47.7	0	59.816	22.9547	23.1682	24.3099	24.0733	23.5095	23.8571	23.8105	23.2252	23.1976	22.9045	24.9905	23.6694	0.195698	-0.377222	0.0219532	-0.0415109	0.27818	-0.443719
iniB	Isoniazid inductible gene protein IniB	Unknown	P9WJ97	Rv0341	Mb0348	cell wall and cell processes	43.921	2	9.6	0	12.255	22.6509	22.9474	25.2732	24.2301	24.5291	24.4781	22.8041	22.7217	23.907	24.4052	23.5421	23.779	0.119633	-0.284934	0.855724	0.503647	0.763497	-0.764548
Rv3104c	Possible conserved transmembrane protein	Unknown	O05781	Rv3104c	Mb3131c	cell wall and cell processes	33.38	8	29.2	0	109.81	23.6845	23.1748	24.4713	23.1407	23.036	25.4929	24.8099	24.2754	23.3772	24.8653	23.4237	24.2671	0.293848	-0.408485	0.119037	-0.295533	0.0175549	-0.0312481
Rv1465	Possible nitrogen fixation related protein	Function unknown; probably involved in cellular metabolism.	O53156	Rv1465	Mb1500	intermediary metabolism and respiration	17.711	7	72.8	0	95.15	26.6948	27.0133	27.0013	27.0549	27.4411	27.0979	27.24	26.5636	26.7506	27.3315	25.628	26.9036	0.209251	0.282131	0.475792	0.576931	0.156885	0.230375
Rv0360c	Conserved protein	Function unknown	O06310	Rv0360c	Mb0367c	conserved hypotheticals	15.329	3	22.8	0	30.525	26.8336	26.5455	26.5014	27.0243	25.9765	26.5805	26.6918	26.8292	26.9352	26.4501	26.2205	26.844	0.227638	0.121984	0.0209377	0.0222365	0.737129	0.31384
asd	Aspartate-semialdehyde dehydrogenase Asd (ASA dehydrogenase) (ASADH) (aspartic semialdehyde dehydrogenase) (L-aspartate-beta-semialdehyde dehydrogenase)	Involved at the second step in the common biosynthetic pathway leading from asp to the cell wall precursor MESO-diaminopimelate, to LYS, to met, to ILE and to THR [catalytic activity: L-aspartate-semialdehyde + orthophosphate + NADP(+) = L-aspartyl phosphate + NADPH].	P9WNX5	Rv3708c	Mb3735c	intermediary metabolism and respiration	36.23	21	72.2	0	323.31	30.2448	30.519	30.5702	30.4017	28.8274	30.5832	30.5911	30.3925	30.6592	29.7069	30.3164	30.3415	0.630636	0.323051	0.112189	-0.184146	0.893323	0.426032
Rv1474c	Probable transcriptional regulatory protein	Involved in transcriptional mechanism	O53165	Rv1474c	Mb1510c	regulatory proteins	21.269	7	41.2	0	11.86	23.0204	22.6432	24.0378	23.4649	23.7744	23.7518	23.7046	24.0551	24.5693	23.5634	23.7316	23.2751	0.264367	-0.28957	0.350207	0.140345	0.965946	0.586319
cobQ2	Possible cobyric acid synthase CobQ2	Involved in cobalamin biosynthesis. Catalyzes amidations at positions B, D, E, and G on adenosylcobyrinic A,C-diamide. NH(2) groups are provided by glutamine, and one molecule of ATP is hydrogenolyzed for each amidation.	I6XI14	Rv3713	Mb3740	intermediary metabolism and respiration	24.157	6	40.3	0	40.747	24.9312	22.8734	23.4428	23.5537	25.5519	25.5696	22.9697	24.954	23.5734	24.1665	24.9037	23.8996	0.348851	-0.574142	0.3174	0.568469	0.302727	-0.490913
moxR1	Probable transcriptional regulatory protein MoxR1	Involved in transcriptional mechanism	Q79FN7	Rv1479	Mb1515	regulatory proteins	40.762	26	89.9	0	323.31	31.0055	30.9804	30.9864	30.9986	29.5754	31.3863	31.2511	30.7892	31.118	30.1934	31.0669	31.3776	0.114107	0.11147	0.126388	-0.225868	0.172732	0.173454
Rv1505c	Conserved hypothetical protein	Function unknown	P71784	Rv1505c	Mb1543c	conserved hypotheticals	24.056	5	34.4	0	33.8	27.4267	27.7421	27.7831	27.2224	27.2592	27.5046	27.8411	27.4988	27.6687	27.6813	27.4168	27.926	0.0444122	-0.0240866	0.942877	-0.345993	0.00961284	-0.00517146
pknG	Serine/threonine-protein kinase PknG (protein kinase G) (STPK G)	Involved in signal transduction (via phosphorylation). Thought to regulate amino-acid uptake and stationary-phase metabolism. Phosphorylates the peptide substrate myelin basic protein (MBP) at serine residues [catalytic activity: ATP + a protein = ADP + a phosphoprotein].	P9WI73	Rv0410c	Mb0418c	regulatory proteins	81.576	17	29.9	0	56.064	27.6825	27.7682	28.0696	25.8844	23.0785	27.182	27.3458	26.7125	27.2215	26.3748	28.2092	27.8395	0.253636	0.365619	0.717114	-2.09288	0.255615	-0.381202
fadD25	Probable fatty-acid-AMP ligase FadD25 (fatty-acid-AMP synthetase) (fatty-acid-AMP synthase)	Function unknown, but involvement in lipid degradation.	P9WQ45	Rv1521	Mb1548	lipid metabolism	63.141	15	41	0	114.47	25.7286	25.6739	27.0056	25.6435	23.3506	26.1904	28.064	27.2896	26.9632	22.8767	26.4396	26.5028	0.27118	0.862992	0.048996	-0.211533	0.806544	2.16592
devR	Two component transcriptional regulatory protein DevR (probably LuxR/UhpA-family)	Regulator part of the two component regulatory system DEVR/DEVS/dost. Controls HSPX|Rv2031|ACR expression.	P9WMF9	Rv3133c	Mb3157c	regulatory proteins	23.294	18	60.4	0	301.15	29.3564	29.14	28.8849	29.2598	29.6452	29.2793	29.4791	29.3487	29.7197	29.8941	29.3926	29.6426	1.21938	-0.51597	0.577726	-0.248341	0.283361	-0.127261
thiD	Probable phosphomethylpyrimidine kinase ThiD (HMP-phosphate kinase) (HMP-P kinase)	Involved in thiamine biosynthesis. Catalyzes the phosphorylation of HMP-P to HMP-pp [catalytic activity: ATP + 4-amino-2-methyl-5-phosphomethylpyrimidine = ADP + 4-amino-2-methyl-5-diphosphomethylpyrimidine].	P9WG77	Rv0422c	Mb0430c	intermediary metabolism and respiration	27.51	6	37	0	95.373	24.3827	24.8549	23.7086	23.1936	23.9184	25.6533	25.2213	23.6256	25.1493	24.0482	22.857	24.3055	0.447031	0.578536	0.238591	0.518213	0.607329	0.928509
Rv1531	Conserved protein	Unknown	O53905	Rv1531	Mb1558	conserved hypotheticals	20.795	8	75.5	0	66.092	27.7639	27.61	27.2868	27.5285	27.9306	27.7768	27.711	27.5553	27.7558	27.631	27.2808	27.3854	0.278778	0.121144	0.934666	0.31288	0.939553	0.241625
Rv3143	Probable response regulator	Unknown, but could be involved in regulatory mechanism	P9WGL7	Rv3143	Mb3167	regulatory proteins	14.386	8	82	0	70.453	27.736	27.5419	27.3831	27.0169	28.3452	27.2245	27.1001	27.2289	27.1777	27.8714	26.9441	27.5076	0.145041	0.112613	0.0618626	0.087827	0.426978	-0.272175
Rv0435c	Putative conserved ATPase	ATPase; possibly catalyzes the transport of undetermined substrate with hydrolyse of ATP [catalytic activity: ATP + H(2)O + undetermined substrate(in) = ADP + phosphate + undetermined substrate(out)].	P96281	Rv0435c	Mb0443c	cell wall and cell processes	75.345	11	21.4	0	21.848	23.4136	20.8388	23.1816	23.9236	24.6446	23.4337	22.9924	23.1969	23.0591	22.8016	23.2846	23.381	0.331777	-0.677716	1.00429	0.84492	0.143018	-0.0729186
ileS	Isoleucyl-tRNA synthetase IleS	Charging ILE tRNA [catalytic activity: ATP + L-isoleucine + tRNA(ILE) = AMP + diphosphate + L-isoleucyl-tRNA(ILE)].	P9WFV3	Rv1536	Mb1563	information pathways	117.34	56	64.3	0	270.28	29.1226	29.1911	29.0898	28.8082	25.5273	28.7689	28.8303	29.0462	28.7396	27.6014	28.7194	28.5229	1.15991	0.853262	0.195209	-0.579762	0.762616	0.590819
nuoG	Probable NADH dehydrogenase I (chain G) NuoG (NADH-ubiquinone oxidoreductase chain G)	Involved in aerobic|anaerobic respiration [catalytic activity: NADH + ubiquinone = NAD(+) + ubiquinol].	P9WIV9	Rv3151	Mb3175	intermediary metabolism and respiration	85.411	46	72.7	0	323.31	31.3225	31.3719	31.3362	31.1839	31.9843	31.2854	31.2893	31.3363	31.4095	31.6725	31.3712	31.3852	0.598308	-0.132745	0.0100988	0.00827853	0.558409	-0.131241
Rv1546	Conserved protein	Function unknown	P9WLU7	Rv1546	Mb1573	conserved hypotheticals	15.324	6	43.4	0	32.74	26.2083	26.2123	25.9716	26.0517	25.6283	25.7894	26.1712	26.0146	25.811	26.0884	26.2845	26.2756	0.347004	-0.0854219	1.32395	-0.392982	0.822716	-0.217212
Rv0458	Probable aldehyde dehydrogenase	Interconversion aldehyde and acid [catalytic activity: an aldehyde + NAD+ + H2O = an acid + NADH].	P9WNY1	Rv0458	Mb0467	intermediary metabolism and respiration	54.574	19	58.6	0	323.31	27.8388	27.5725	27.5469	27.8184	27.3824	27.5659	28.0162	27.684	28.5122	28.2907	28.0931	28.0277	1.77785	-0.484426	1.67247	-0.548255	0.0934989	-0.0663433
fadB2	3-hydroxybutyryl-CoA dehydrogenase FadB2 (beta-hydroxybutyryl-CoA dehydrogenase) (BHBD)	Butyrate/butanol-producing pathway [catalytic activity: (S)-3-hydroxybutanoyl-CoA + NADP+ = 3-acetoacetyl-CoA + NADPH]	P9WNP7	Rv0468	Mb0477	lipid metabolism	30.728	19	80.8	0	323.31	31.4875	31.5622	31.4646	31.4954	32.0376	31.5217	31.6337	31.7509	31.617	32.1018	31.6987	31.5982	0.876138	-0.294793	0.18712	-0.114683	0.343632	-0.132384
Rv3747	Conserved protein	Function unknown	O69714	Rv3747	Mb3773	conserved hypotheticals	13.539	7	52.8	0	211.45	29.21	29.3537	29.0214	29.4509	29.6562	28.8428	29.5517	28.968	28.9601	29.6909	29.806	29.5347	1.74871	-0.482179	0.633309	-0.360562	1.15239	-0.517284
Rv1558	Conserved protein	Function unknown	P9WP11	Rv1558	Mb1584	conserved hypotheticals	16.347	10	80.4	0	238.64	29.3042	29.4762	28.9556	28.9074	29.2186	28.9248	28.9901	28.9944	28.8704	29.37	28.5254	29.115	0.34114	0.241859	0.0165463	0.0134506	0.0716714	-0.0518462
nadC	Probable nicotinate-nucleotide pyrophosphatase NadC	de novo biosynthesis of NAD and NADP [catalytic activity: nicotinate D-ribonucleotide + diphosphate + CO(2) = pyridine-2,3-dicarboxylate + 5-phospho-alpha-D-ribose 1-diphosphate]	P9WJJ7	Rv1596	Mb1622	intermediary metabolism and respiration	29.951	12	63.5	0	142.56	27.0113	27.0867	27.0256	26.8286	27.6958	26.8495	27.1138	26.8706	27.1931	27.7703	26.805	27.1466	0.283498	-0.199432	0.103921	-0.115987	0.239286	-0.181475
Rv0472c	Probable transcriptional regulatory protein (possibly TetR-family)	Possibly involved in transcriptional mechanism.	P9WMD9	Rv0472c	Mb0482c	regulatory proteins	26.417	6	39.7	0	38.375	23.0686	25.9404	23.2506	24.8114	23.8417	23.6898	24.4048	24.2345	24.2289	24.6513	23.302	23.7245	0.0669533	0.193933	0.156216	0.221676	0.42002	0.396785
Rv0479c	Probable conserved membrane protein	Unknown	P9WKV7	Rv0479c	Mb0489c	cell wall and cell processes	37.048	17	81.3	0	323.31	23.4837	23.6279	23.7117	24.2862	24.7055	25.2066	23.6596	23.6992	23.2191	24.2084	23.656	22.5885	0.0916643	0.123472	1.07718	1.24846	0.0279928	0.041652
trpB	Tryptophan synthase, beta subunit TrpB	Tryptophan biosynthesis pathway (fifth last step). The beta subunit is responsible for the synthesis of L-tryptophan from indole and L-serine. [catalytic activity: L-serine + 1-(indol-3-YL)glycerol 3-phosphate = L-tryptophan + glyceraldehyde 3-phosphate + H(2)O]	P9WFX9	Rv1612	Mb1638	intermediary metabolism and respiration	43.286	21	65.4	0	296.49	29.6292	29.6216	29.4563	29.3781	28.8669	29.5979	29.6005	29.5421	29.5391	28.8849	29.5153	29.502	0.551309	0.268326	0.0219443	-0.0197411	0.550544	0.259843
Rv0500A	Conserved protein	Function unknown	P9WKT7	Rv0500A	Mb0512	conserved hypotheticals	8.5076	4	64.1	0	48.674	25.8541	25.8643	26.2323	26.3165	25.9323	25.7093	26.4129	26.1371	26.535	26.2685	25.73	26.0449	0.0533007	-0.0309079	0.0409491	-0.0284398	0.822327	0.347192
serB1	Possible phosphoserine phosphatase SerB1 (PSP) (O-phosphoserine phosphohydrolase) (pspase)	Removes a phosphate from phosphoserine [catalytic activity: phosphoserine + H2O = serine + phosphate].	P9WGJ3	Rv0505c	Mb0517c	intermediary metabolism and respiration	32.673	9	36	0	289.5	22.0118	22.8492	23.2014	24.2238	24.2185	23.9437	23.8173	23.8517	23.8659	27.1465	24.3893	24.8384	1.39779	-2.77059	0.706291	-1.32943	0.879464	-1.61314
hemB	Probable delta-aminolevulinic acid dehydratase HemB (porphobilinogen synthase) (ALAD) (ALADH)	Involved in porphyrin and heme biosynthesis (at the second step) [catalytic activity: 2 5-aminolevulinate = porphobilinogen + 2 H2O].	P9WMP5	Rv0512	Mb0525	intermediary metabolism and respiration	34.871	17	57.1	0	223.33	29.2111	29.4263	29.2874	29.4421	29.932	29.2326	29.4611	29.5625	29.4501	29.8657	29.1763	29.1959	0.167307	-0.10432	0.149122	0.122927	0.125429	0.0785885
Rv3768	Unknown protein	Unknown	P72035	Rv3768	Mb3794	conserved hypotheticals	13.167	5	79	0	24.467	26.7609	26.803	26.7907	23.198	27.4392	26.2185	26.6313	24.3458	26.4516	23.4538	26.5285	22.8292	1.03271	2.51439	0.325511	1.3481	0.494111	1.53909
ccsA	Possible cytochrome C-type biogenesis protein CcsA	Required during cytochrome biogenesis at the step of heme attachment.	O06393	Rv0529	Mb0542	intermediary metabolism and respiration	35.053	4	19.1	0	18.314	23.7651	23.9334	25.4136	22.4901	23.9762	24.669	22.1762	23.1898	24.1929	24.6974	23.7029	24.6919	0.00349614	0.00662104	0.379016	-0.65233	0.81432	-1.17778
Rv3198A	Possible glutaredoxin protein	Function unknown	P9WN17	Rv3198A	Mb3223	intermediary metabolism and respiration	8.9631	3	50	0	35.593	25.2829	24.0309	24.0692	24.4297	25.3156	24.7903	25.1584	25.1168	26.0547	24.0816	24.7106	25.1504	0.133427	-0.186553	0.18746	0.197641	0.848443	0.795755
mtnP	Probable 5'-methylthioadenosine phosphorylase Pnp (MTA phosphorylase)	Phosphorylates 5'-methylthioadenosin [catalytic activity: 5'-methylthioadenosine + phosphate = adenine + 5-methylthio-D-ribose 1-phosphate].	O06401	Rv0535	Mb0549	intermediary metabolism and respiration	27.963	8	50.4	0	78.513	25.5353	25.5148	21.9255	25.5976	24.6801	25.7908	25.6262	26.1628	25.6516	25.9467	25.5246	25.7772	0.51846	-1.42429	0.467804	-0.393342	0.108287	0.0639979
rfbE	Probable O-antigen/lipopolysaccharide transport ATP-binding protein ABC transporter RfbE	May form an ATP-driven O-antigen/lipopolysaccharide export apparatus, in association with RFBD|Rv3783. Responsible for energy coupling to the transport system.	P72047	Rv3781	Mb3810	cell wall and cell processes	29.992	7	30.8	0	50.85	24.4189	23.6007	24.8367	24.5985	24.3488	24.5978	23.9501	24.1407	24.7571	24.5039	23.6367	24.5157	0.0491291	0.0666364	0.416638	0.296226	0.0582027	0.0638358
Rv3208	Probable transcriptional regulatory protein (probably TetR-family)	Involved in transcriptional mechanism.	O05858	Rv3208	Mb3233	regulatory proteins	25.166	10	65.4	0	122.64	23.6153	23.4569	23.7993	23.7993	25.1125	22.7355	23.4735	23.1137	24.9023	23.9407	24.4431	24.2606	1.53893	-0.590927	0.179805	-0.33237	0.272889	-0.384949
Rv3212	Conserved alanine valine rich protein	Function unknown	O05854	Rv3212	Mb3238	conserved hypotheticals	42.42	14	63.4	0	132.42	22.9444	22.8139	24.0967	24.3981	24.4363	23.8857	25.6207	23.6717	24.31	24.227	23.4917	23.7554	0.513468	-0.539684	0.676498	0.415318	0.506807	0.70944
Rv3786c	Unknown protein	Unknown	P9WKW9	Rv3786c	Mb3815c	conserved hypotheticals	44.944	15	50.6	0	132.72	27.5987	27.7961	27.7257	27.1314	27.3285	27.605	28.3709	27.9168	27.825	28.2384	27.3394	27.9472	0.190534	-0.134879	0.749286	-0.486702	0.246749	0.195883
aftA	Arabinofuranosyltransferase AftA	Involved in the biosynthesis of the mycobacterial cell wall arabinan	P9WN03	Rv3792	Mb3821	cell wall and cell processes	69.514	10	13.4	0	20.792	24.0167	23.3753	23.1154	24.4987	23.9898	24.199	22.7592	24.5966	24.2122	25.0586	24.2178	23.4539	0.62258	-0.740975	0.0096503	-0.0142536	0.206141	-0.387431
fadE35	Probable acyl-CoA dehydrogenase FadE35	Function unknown, but involved in lipid degradation.	O53577	Rv3797	Mb3826	lipid metabolism	65.321	16	29.5	0	228.54	26.5982	26.504	26.4538	26.3867	26.3806	26.462	26.3487	26.3802	26.6976	26.9873	26.4543	26.4976	0.293898	-0.127747	0.614556	-0.236653	0.3474	-0.170897
Rv3802c	Probable conserved membrane protein	Shown to have phospholipase and thioesterase activity	O53581	Rv3802c	Mb3832c	cell wall and cell processes	35.448	9	46.4	0	105.45	23.273	24.4587	24.7253	23.6706	23.931	23.2411	23.592	24.022	22.2586	23.7179	24.7793	23.8267	0.0266268	0.044412	0.557611	-0.49372	0.578966	-0.817105
glfT2	Bifunctional UDP-galactofuranosyl transferase GlfT2	Converts UDP-galactofuranose in cell wall galactan polymerization. Has UDP-Galf:beta-D-(1->5) and UDP-Galf:beta-D-(1->6) galactofuranosyltransferase activities.	O53585	Rv3808c	Mb3838c	cell wall and cell processes	71.506	14	28.4	0	52.089	25.9398	26.087	24.3841	24.6953	22.947	26.7951	25.3783	26.2936	26.2512	24.6063	25.5761	25.7798	0.0807575	0.149593	0.163452	-0.50827	0.627198	0.653636
Rv0576	Probable transcriptional regulatory protein (possibly ArsR-family)	Involved in transcriptional mechanism.	O53773	Rv0576	Mb0591	regulatory proteins	46.388	20	59	0	323.31	27.9547	28.3562	28.3471	28.2329	26.6782	28.4571	28.2449	28.1262	28.3964	28.1589	27.8463	28.3945	0.155895	0.0860945	0.232039	-0.343856	0.27853	0.122602
mtrA	Two component sensory transduction transcriptional regulatory protein MtrA	Transcriptional activator part of a two component regulatory system.	P9WGM7	Rv3246c	Mb3274c	regulatory proteins	25.279	14	81.1	0	309.63	30.4387	29.7106	29.8697	29.8162	29.731	30.1769	30.2826	29.8333	29.9314	30.7171	30.0969	30.4193	0.64238	-0.404767	1.04912	-0.503089	0.812652	-0.395297
argJ	Probable glutamate N-acetyltransferase ArgJ	Arginine biosynthesis.	P9WPZ3	Rv1653	Mb1681	intermediary metabolism and respiration	41.147	11	43.6	0	156.32	28.8889	28.713	28.765	28.2123	26.4514	28.3695	28.4113	28.5326	28.7766	28.6257	28.9199	28.4711	0.341189	0.116768	0.723766	-0.994483	0.227393	-0.098711
mce2R	Probable transcriptional regulatory protein Mce2R (GntR-family)	Involved in transcriptional mechanism.	P9WMG5	Rv0586	Mb0601	regulatory proteins	26.509	11	70.8	0	22.31	23.3274	25.3228	24.3677	23.5658	24.8164	23.9248	23.2488	24.314	23.3152	24.2935	24.2855	23.2485	0.231373	0.396766	0.114064	0.159831	0.257494	-0.316523
Rv3813c	Conserved protein	Function unknown	O07810	Rv3813c	Mb3843c	conserved hypotheticals	28.533	9	71.1	0	108.45	24.7892	23.301	23.1858	22.6812	25.212	24.4946	23.7141	23.7501	23.6559	23.7734	24.9199	24.3473	0.406929	-0.588235	0.0945054	-0.217602	0.899135	-0.640187
manB	Probable phosphomannomutase PmmA (PMM) (phosphomannose mutase)	This enzyme converses D-mannose 1-phosphate in D-mannose 6-phosphate [catalytic activity: D-mannose 1-phosphate = D-mannose 6-phosphate].	O86374	Rv3257c	Mb3285c	intermediary metabolism and respiration	49.04	18	55.7	0	323.31	29.8634	29.9369	29.688	29.753	30.1973	29.808	29.9747	29.8676	29.9269	30.2801	29.7294	29.7079	0.14038	-0.0763283	0.0194226	0.0136388	0.0307049	0.0173041
Rv3818	Unknown protein	Unknown	P9WH21	Rv3818	Mb3848	conserved hypotheticals	57.647	26	51	0	319.6	29.8881	29.7839	29.7646	29.8767	29.3593	29.8091	29.9364	29.6	29.9071	30.2457	29.8475	29.8752	0.591136	-0.177268	0.675159	-0.30777	0.449577	-0.174966
manB	D-alpha-D-mannose-1-phosphate guanylyltransferase ManB (D-alpha-D-heptose-1-phosphate guanylyltransferase)	Involved in GDP-mannose biosynthesis and biosynthesis of nucleotide-activated glycero-manno-heptose (D-alpha-D pathway): generates GDP-mannose and phosphate from GTP and alpha-D-mannose 1-phosphate. MANB product is needed for all mannosyl glycolipids and polysaccharides which, like rhamnosyl residues, are an important part of the mycobacterium envelope [catalytic activity: alpha-D-mannose 1-phosp…	L7N6A5	Rv3264c	Mb3292c	cell wall and cell processes	37.857	23	68.5	0	241.78	29.8101	29.9604	29.8598	29.7789	29.436	29.6874	29.8204	29.8453	29.8962	29.7513	29.6167	29.8122	0.965818	0.150027	0.323332	-0.092666	0.961999	0.127213
fadD23	Probable fatty-acid-AMP ligase FadD23 (fatty-acid-AMP synthetase) (fatty-acid-AMP synthase)	Function unknown, but involved in lipid degradation.	P9WQ47	Rv3826	Mb3856	lipid metabolism	62.84	20	53.9	0	152.01	28.3087	28.1909	28.2262	28.1165	27.554	28.4844	28.3182	28.2359	28.2502	27.6095	28.6483	28.1212	0.141936	0.115625	0.0643758	-0.0747159	0.17906	0.141774
Rv3269	Conserved protein	Function unknown. May be involved in a chaperoning process.	P96874	Rv3269	Mb3297	virulence, detoxification, adaptation	9.7501	9	80.6	0	113.75	24.6448	25.4098	24.4724	24.695	25.8859	23.8126	23.5479	23.6947	24.0875	26.4284	23.2157	23.0614	0.206944	0.607163	0.169923	0.562672	0.154557	-0.458504
fadE25	Probable acyl-CoA dehydrogenase FadE25	Function unknown, but involved in lipid degradation [catalytic activity: acyl-CoA + ETF = 2,3-dehydroacyl-CoA + reduced ETF].	P9WQG1	Rv3274c	Mb3302c	lipid metabolism	41.723	35	76.9	0	323.31	32.5692	32.7515	32.8068	32.6839	33.0837	32.7025	32.7182	32.6787	32.8284	33.1267	32.5409	32.8634	0.296587	-0.134541	0.0320498	-0.0203082	0.227673	-0.101917
Rv3837c	Probable phosphoglycerate mutase (phosphoglyceromutase) (phosphoglycerate phosphomutase)	Thought to be involved in glycolisis and perhaps glycogen metabolism [catalytic activity: 3-phosphoglycerate = 2-phosphoglycerate].	P96241	Rv3837c	Mb3867c	intermediary metabolism and respiration	25.019	7	46.6	0	51.566	26.3161	26.3785	26.6224	21.8115	23.9966	26.2803	26.6802	26.5361	26.1147	23.5727	25.7905	26.5579	0.557776	1.13199	0.335819	-1.27757	0.552562	1.13663
Rv3843c	Probable conserved transmembrane protein	Unknown	P96235	Rv3843c	Mb3873c	cell wall and cell processes	37.465	7	21.3	0	25.366	24.5932	24.0868	24.8281	22.6716	23.5721	23.3651	23.0362	25.058	24.5062	24.3409	23.6511	24.2872	0.58737	0.409615	1.19201	-0.890156	0.0576129	0.107086
hadA	(3R)-hydroxyacyl-ACP dehydratase subunit HadA	Involved in fatty acid synthesis type II (fas-II)	P9WFK1	Rv0635	Mb0654	intermediary metabolism and respiration	17.48	12	94.9	0	323.31	29.6277	29.4187	29.456	29.2031	28.0757	29.4614	29.3267	29.1832	29.2974	28.4812	29.6668	29.4835	0.317792	0.290277	0.20375	-0.297092	0.0544574	0.0586103
accA3	Probable bifunctional protein acetyl-/propionyl-coenzyme A carboxylase (alpha chain) AccA3: biotin carboxylase + biotin carboxyl carrier protein (BCCP)	Involved in long-chain fatty acid synthesis (at the first step). Carries two functions: biotin carboxyl carrier protein and biotin carboxyltransferase [catalytic activity: ATP + biotin-carboxyl-carrier protein + CO(2) = ADP + orthophosphate + carboxybiotin-carboxyl-carrier protein].	P96890	Rv3285	Mb3313	lipid metabolism	63.782	37	80	0	323.31	32.7244	32.4301	32.5036	32.5214	30.3787	32.6504	32.4279	32.0855	32.3587	30.7608	32.465	32.2538	0.597632	0.726112	0.00851082	0.0235818	0.353085	0.464128
espR	ESX-1 transcriptional regulatory protein EspR	Involved in transcriptional mechanism. Regulates transcription of genes required for ESX-1 system.	P9WJB7	Rv3849	Mb3879	regulatory proteins	14.709	14	75	0	247.47	29.8543	30.0821	29.809	29.9507	29.2586	29.6826	29.7833	29.6785	29.9033	29.3638	29.2148	29.9474	0.784651	0.40649	0.151283	0.122036	0.528988	0.279716
mmaA4	Methoxy mycolic acid synthase 4 MmaA4 (methyl mycolic acid synthase 4) (MMA4) (hydroxy mycolic acid synthase)	Involved in mycolic acids modification. Catalyzes unusual S-adenosyl-methionine-dependent transformation of a cis-olefin mycolic acid into a secondary alcohol. Catalyzes introduction of a hydroxyl group at the distal position on mycolic acid chains to produce the hydroxyl mycolate. Mycolic acids represent a major constituent of the mycobacterial cell wall complex. Methyl transfer results in forma…	Q79FX8	Rv0642c	Mb0661c	lipid metabolism	34.636	20	79.4	0	323.31	30.9094	30.6422	30.9629	29.7448	29.2971	30.8722	31.103	30.6636	31.0878	30.9727	30.8347	30.9608	0.319105	-0.0845617	0.945698	-0.951408	0.0664817	0.0287234
lat	Probable L-lysine-epsilon aminotransferase Lat (L-lysine aminotransferase) (lysine 6-aminotransferase)	Possibly involved in L-alpha-aminoadipic acid (L-AAA) biosynthesis. Catalyzes the transfer of the terminal amino group of L-lysine or L-ornithine to alpha-ketoglutarate [catalytic activity: L-lysine + 2-oxoglutarate = 2-aminoadipate 6-semialdehyde + L-glutamate].	P9WQ77	Rv3290c	Mb3318c	intermediary metabolism and respiration	49.012	11	42.8	0	12.944	25.6194	25.4001	25.264	23.3758	23.954	25.7723	22.3163	25.5762	22.7551	23.4179	25.0595	25.5171	0.518901	0.763013	0.111921	-0.297483	0.390892	-1.11564
ethR	Transcriptional regulatory repressor protein (TetR-family) EthR	Regulates negatively the production of ETHA. Induced ETH resistance when overexpressed in Mycobacterium tuberculosis.	P9WMC1	Rv3855	Mb3885	regulatory proteins	23.756	10	75	0	279.86	23.6119	23.361	23.8291	23.1433	23.9562	24.1172	24.6813	21.9667	24.0918	24.4266	23.6928	24.1305	0.891289	-0.482631	0.393954	-0.344384	0.231959	-0.503373
Rv1674c	Probable transcriptional regulatory protein	Involved in transcriptional mechanism.	O53921	Rv1674c	Mb1701c	regulatory proteins	23.759	4	27.5	0	8.4129	23.4404	23.5459	23.6191	23.8761	24.855	24.1314	23.9648	24.1079	24.8536	23.8028	23.4571	24.3775	0.557985	-0.344002	0.440918	0.408353	0.486018	0.429657
Rv3304	Conserved protein	Function unknown	O53356	Rv3304	Mb3332	conserved hypotheticals	17.488	9	74.2	0	166.86	26.9181	26.8874	26.9602	26.4851	27.2675	27.2278	26.5648	27.2595	23.7349	22.3425	27.2304	26.9514	0.373863	1.41382	0.390259	1.48539	0.0625255	0.344978
fadE16	Possible acyl-CoA dehydrogenase FadE16	Function unknown, but involvement in lipid degradation.	O53926	Rv1679	Mb1706	lipid metabolism	37.876	20	68.6	0	260.2	27.5542	27.6744	27.6702	27.4119	27.1544	28.227	27.8284	28.0575	28.0963	27.7177	27.6126	27.9139	0.52343	-0.115107	0.169374	-0.150279	0.946854	0.246013
atsD	Possible arylsulfatase AtsD (aryl-sulfate sulphohydrolase) (arylsulphatase)	Thought to play an important role in the mineralization of sulfates [catalytic activity: a phenol sulfate + H2O = a phenol + sulfate].	I6XVW9	Rv0663	Mb0682	intermediary metabolism and respiration	86.127	40	61	0	323.31	30.869	30.9944	30.733	30.8942	31.3078	30.8002	30.841	31.053	31.0404	31.0326	30.6589	30.6219	0.246519	0.0943241	0.491019	0.229593	0.629642	0.207012
espF	ESX-1 secretion-associated protein EspF	Function unknown	P9WJD1	Rv3865	Mb3895	cell wall and cell processes	10.618	9	99	0	323.31	23.9558	25.9038	25.4376	26.3657	26.5334	26.87	24.7912	23.6965	24.1316	25.8464	23.4804	24.2613	0.247578	0.569745	1.35329	2.06037	0.158145	-0.322889
mmpL5	Probable conserved transmembrane transport protein MmpL5	Unknown. Thought to be involved in fatty acid transport.	P9WJV1	Rv0676c	Mb0695c	cell wall and cell processes	104.78	18	27.1	0	59.876	23.1467	24.646	24.3756	24.2911	23.6947	24.8792	23.8778	22.2056	23.6143	24.8558	24.2588	23.8988	0.20137	-0.281686	0.0380308	-0.049469	0.872924	-1.10524
Rv0681	Probable transcriptional regulatory protein (possibly TetR-family)	Involved in transcriptional mechanism.	O53789	Rv0681	Mb0700	regulatory proteins	21.262	4	28.6	0	4.2783	23.711	24.0127	24.2931	24.7689	23.7484	25.0048	23.7401	24.6595	22.7624	22.7317	24.0054	23.6289	0.595061	0.550275	0.909739	1.05204	0.14846	0.265317
ppnK	Inorganic polyphosphate/ATP-NAD kinase PpnK (poly(P)/ATP NAD kinase)	Catalyzes the phosphorylation of NAD to NADP. Utilizes ATP and other nucleoside triphosphates as well as inorganic polyphosphate as a source of phosphorus [catalytic activity: ATP + NAD+ = ADP + NADP+].	P9WHV7	Rv1695	Mb1721	intermediary metabolism and respiration	32.903	13	42	0	102.95	28.7029	28.6936	28.5236	28.8027	26.717	28.6527	28.6773	28.4209	28.7095	28.0156	28.0883	28.7453	0.67776	0.356974	0.115334	-0.225592	0.569608	0.319503
sppA	Possible protease IV SppA (endopeptidase IV) (signal peptide peptidase)	Involved in digestion of the cleaved signal peptides. This activity is necessary to maintain proper secretion of mature proteins across the membrane.	P95072	Rv0724	Mb0745	cell wall and cell processes	65.935	21	45.6	0	71.174	26.0846	25.7168	25.5644	25.6642	25.6581	26.0842	26.1442	25.5699	25.6749	26.0987	25.9637	26.0498	0.713465	-0.248824	0.736486	-0.235218	0.595979	-0.241051
scpB	Possible segregation and condensation protein ScpB	Involved in chromosome structure and partitioning	I6XCB2	Rv1710	Mb1737	cell wall and cell processes	25.276	6	39.8	0	26.486	26.1727	26.2919	26.3798	25.8349	23.2312	26.3947	26.5061	26.4246	26.3899	26.5359	26.0832	26.7493	0.353678	-0.174675	0.584414	-1.3025	0.0267818	-0.0159206
secY	Probable preprotein translocase SecY	Essential for protein export. Interacts with SECA|Rv3240c and SECE|Rv0638 to allow the translocation of proteins across the plasma membrane, by forming part of a channel.	P9WGN3	Rv0732	Mb0753	cell wall and cell processes	47.611	12	19	0	23.687	25.5078	25.0053	24.832	23.4244	25.7933	24.6935	24.7813	24.7396	24.7469	25.2274	24.158	25.3827	0.166669	0.192327	0.134031	-0.285631	0.162797	-0.166762
nagA	Probable N-acetylglucosamine-6-phosphate deacetylase NagA (GlcNAc 6-P deacetylase)	Involved in N-acetyl glucosamine utilization pathway [catalytic activity: N-acetyl-D-glucosamine 6-phosphate + H(2)O = D-glucosamine 6-phosphate + acetate].	O53382	Rv3332	Mb3365	cell wall and cell processes	38.805	13	53	0	24.605	22.8439	24.2554	24.3481	24.2257	24.0969	23.2855	24.2793	23.5573	23.9021	24.4717	23.0518	25.0665	0.189	-0.380815	0.187783	-0.327272	0.169318	-0.283756
Rv0738	Conserved protein	Function unknown	P9WKS3	Rv0738	Mb0759	conserved hypotheticals	19.147	9	95.6	0	157.82	28.548	28.2803	28.2395	28.2492	28.1122	28.5207	28.5094	28.2783	28.4342	27.9217	27.9242	28.4409	0.587074	0.260309	0.399253	0.19843	0.773879	0.311726
trpS	Probable tryptophanyl-tRNA synthetase TrpS (tryptophan--tRNA ligase) (TRPRS) (tryptophan translase)	Involved in translation mechanism [catalytic activity: ATP + L-tryptophan + tRNA(TRP) = AMP + pyrophosphate + L-tryptophanyl-tRNA(TRP)].	P9WFT3	Rv3336c	Mb3369c	information pathways	36.272	12	46.4	0	323.31	28.9521	29.4574	29.2481	29.3269	28.4065	29.0792	29.2192	29.4651	29.1107	27.6249	29.4307	29.4181	0.25374	0.394641	0.0592789	0.11294	0.292813	0.44042
Rv1722	Possible carboxylase	Function unknown, but supposed involvement in lipid metabolism	P71980	Rv1722	Mb1751	lipid metabolism	55.46	10	32.2	0	40.599	26.0107	26.1091	25.8393	26.6158	23.7531	26.1642	26.2533	26.178	26.409	23.8572	25.9187	26.5198	0.27469	0.554497	0.0220106	0.0791302	0.451413	0.848184
pcnA	Probable poly(A) polymerase PcnA (polynucleotide adenylyltransferase) (NTP polymerase) (RNA adenylating enzyme) (poly(A) polymerase)	Involved in transcription mechanism [catalytic activity: N ATP + (nucleotide)(M) = N diphosphate + (nucleotide)(M+N)].	L7N672	Rv3907c	Mb3937c	information pathways	53.087	17	51.7	0	96.864	26.7061	25.4504	23.0343	26.211	25.9526	26.2377	24.5313	23.6141	25.1457	23.2043	25.9142	25.5712	0.0414011	0.167039	0.653214	1.2372	0.185072	-0.466183
fadD1	Possible fatty-acid-CoA ligase FadD1 (fatty-acid-CoA synthetase) (fatty-acid-CoA synthase)	Function unknown, but supposed involvement in lipid degradation.	P72007	Rv1750c	Mb1779c	lipid metabolism	57.413	9	23.3	0	17.312	22.701	23.4162	22.9638	23.7473	23.6704	24.5854	23.3595	23.5563	23.8443	23.9422	23.8719	22.7238	0.470864	-0.485626	0.423808	0.488382	0.0613025	0.0740719
fadE9	Probable acyl-CoA dehydrogenase FadE9	Function unknown, but involved in lipid degradation.	I6Y4R2	Rv0752c	Mb0774c	lipid metabolism	41.409	15	46.9	0	26.909	26.0693	25.9518	25.9742	25.1845	24.1243	25.3172	25.0436	22.8774	25.0564	22.9842	23.8188	25.2761	1.37293	1.97209	0.479615	0.84894	0.109814	0.299454
Rv0756c	Unknown protein	Unknown	P71813	Rv0756c	Mb0779c	conserved hypotheticals	24.884	11	65.6	0	121.86	23.9462	25.9101	25.3612	25.8806	25.7195	23.0341	24.3188	23.7487	23.5398	22.2734	24.0669	24.2364	0.836113	1.5469	0.533979	1.35252	0.197222	0.34357
adhB	Possible zinc-containing alcohol dehydrogenase NAD dependent AdhB	Thought to catalyze the reversible oxidation of ethanol to acetaldehyde with the concomitant reduction of NAD. Probably acts on primary or secondary alcohols or hemiacetals [catalytic activity: an alcohol + NAD+ = an aldehyde or ketone + NADH].	P9WQC7	Rv0761c	Mb0784c	intermediary metabolism and respiration	39.747	20	67.5	0	323.31	33.2967	33.2602	33.2265	33.3143	33.5831	33.469	33.4002	33.4106	33.4349	33.4354	33.0437	33.201	0.107588	0.0344429	0.763387	0.228792	0.758729	0.188544
	Conserved hypothetical protein	Unknown	A0A0H3MB19			conserved hypotheticals	17.092	2	9.7	0	4.4298	23.8437	24.0905	22.996	23.9751	23.7335	24.2671	23.7528	24.9296	23.2645	25.7049	23.511	24.0243	0.446922	-0.769992	0.244845	-0.421513	0.200998	-0.431108
Rv0771	Possible 4-carboxymuconolactone decarboxylase (CMD)	Involved in aromatic hydrocarbons catabolism. Thought to be involved in the catabolism of protocatechuate to succinate-and acetyl-CoA in the beta-ketoadipate pathway (at the third step) [catalytic activity: 2-carboxy-5-oxo-2,5-dihydrofuran-2-acetate = 5-oxo-4,5-dihydrofuran-2-acetate + CO(2)].	I6Y4S7	Rv0771	Mb0794	intermediary metabolism and respiration	16.073	9	65.3	0	47.234	26.5364	26.8535	26.7895	26.3999	26.6718	26.569	26.7672	27.4163	26.828	26.2313	26.9432	26.5081	0.293184	0.165607	0.0209422	-0.013937	0.688335	0.442955
esxK	ESAT-6 like protein EsxK (ESAT-6 like protein 3)	Function unknown	P9WNJ9	Rv1197	Mb1229	cell wall and cell processes	10.99	6	90.8	0	51.609	23.6197	24.1354	23.7672	26.2829	23.2323	25.1336	24.9363	22.8998	24.2908	23.7027	24.4419	25.1511	0.593295	-0.591164	0.173824	0.45101	0.205665	-0.389596
eccE5	ESX conserved component EccE5. ESX-5 type VII secretion system protein. Probable membrane protein.	Function unknown	P9WJE3	Rv1797	Mb1825	cell wall and cell processes	44.178	7	17.5	0	18.448	23.673	24.5816	22.6945	24.4749	24.4909	23.4417	24.5788	24.5782	24.5536	22.2546	23.4632	24.0144	0.208519	0.405591	0.644402	0.891729	1.19921	1.32611
Rv0791c	Conserved protein	Function unknown	I6X9T8	Rv0791c	Mb0815c	conserved hypotheticals	37.714	14	52.7	0	82.455	26.0852	26.4207	26.3942	26.0223	23.4824	26.5344	26.227	26.38	26.49	25.628	26.3879	26.243	0.345041	0.213704	0.310801	-0.73997	0.497574	0.279359
lpqD	Probable conserved lipoprotein LpqD	Unknown	O50416	Rv3390	Mb3422	cell wall and cell processes	25.056	10	45.3	0	101.78	23.2102	23.0256	22.9958	23.9931	23.995	23.6336	25.0201	24.3372	24.6487	25.3807	22.6531	24.2335	0.566581	-1.01189	0.0962711	-0.215203	0.287128	0.579561
Rv3401	Conserved protein	Function unknown; probably enzyme involved in cellular metabolism.	P9WN13	Rv3401	Mb3434	intermediary metabolism and respiration	87.314	32	55.1	0	323.31	29.8231	29.1121	29.1561	29.6647	23.9827	29.4534	29.5301	28.7575	29.0105	25.3344	29.3798	29.5218	0.389211	1.28509	0.0565493	-0.37838	0.29765	1.02069
ilvG	Probable acetolactate synthase IlvG (acetohydroxy-acid synthase)(ALS)	Valine and isoleucine biosynthesis (first step) [catalytic activity: 2-acetolactate + CO(2) = 2 pyruvate]	P9WG39	Rv1820	Mb1851	intermediary metabolism and respiration	57.52	17	56.9	0	323.31	27.5619	28.1368	27.9946	28.2909	23.4825	27.9813	27.8816	28.099	28.0937	22.6739	27.5336	27.631	0.521074	1.95158	0.101726	0.638725	0.563446	2.0786
cysA1	Probable thiosulfate sulfurtransferase CysA3 (rhodanese-like protein) (thiosulfate cyanide transsulfurase) (thiosulfate thiotransferase)	May be a sulfotransferase involved in the formation of thiosulfate [catalytic activity: thiosulfate + cyanide = sulfite + thiocyanate].	P9WHF9	Rv3117	Mb3144	intermediary metabolism and respiration	31.014	35	79.8	0	323.31	33.6766	33.6719	33.8274	33.8035	32.8556	33.5281	33.8218	33.6187	33.6574	33.4195	33.5165	33.8171	0.468911	0.140925	0.24353	-0.188665	0.354328	0.114927
garA	Conserved protein with FHA domain, GarA	Function unknown	P9WJA9	Rv1827	Mb1858	conserved hypotheticals	17.251	12	90.1	0	323.31	30.7154	30.7308	30.7071	31.3507	31.5031	30.7663	30.9714	31.1681	30.6214	30.8384	30.7763	30.6104	0.128494	-0.0239468	0.926041	0.464985	0.441216	0.178602
phoU2	Probable phosphate-transport system transcriptional regulatory protein PhoY2	Involved in transcriptional regulation of active transport of inorganic phosphate across the membrane.	P9WI95	Rv0821c	Mb0844c	cell wall and cell processes	23.514	8	60.1	0	120.84	23.3499	23.0783	24.4422	24.7432	24.2681	25.3248	23.3808	23.6236	22.1138	22.3962	23.3143	22.6556	0.771407	0.83478	2.0803	1.99	0.175397	0.250709
nnr	Conserved protein	Function unknown	P9WF11	Rv3433c	Mb3463c	conserved hypotheticals	46.77	6	25.6	0	25.062	23.8433	23.1262	22.0701	22.8637	23.1336	23.654	24.3303	24.8341	23.9815	23.9068	24.5929	24.4456	1.10185	-1.3019	1.61185	-1.09801	0.0723704	0.0668208
ndh	Probable NADH dehydrogenase Ndh	Transfer of electrons from NADH to the respiratory chain. The immediate electron acceptor for the enzyme is believed to be ubiquinone. Does not couple the redox reaction to proton translocation.	P95160	Rv1854c	Mb1885c	intermediary metabolism and respiration	49.718	10	31.1	0	71.579	25.0229	24.6752	25.4176	24.9689	24.1817	24.8224	24.9781	23.7482	23.6945	25.1301	24.1645	25.0861	0.255664	0.245024	0.125333	-0.135867	0.551709	-0.653248
rmlB	dTDP-glucose 4,6-dehydratase RmlB	Involved in dTDP-L-rhamnose biosynthesis [catalytic activity: dTDP-glucose = dTDP-4-dehydro-6-deoxy-D-glucose + H(2)O].	P9WN65	Rv3464	Mb3493	intermediary metabolism and respiration	37.557	24	68.3	0	323.31	29.9157	29.9781	29.54	30.1349	28.221	29.5939	29.0104	29.3363	29.6328	29.4399	29.8948	29.7747	0.218149	0.108143	0.263352	-0.386538	0.769239	-0.376656
Rv0854	Conserved protein	Function unknown	I6X9Y7	Rv0854	Mb0877	conserved hypotheticals	16.345	4	33.3	0	125.35	27.4071	27.4002	27.4164	27.2942	28.0136	27.3014	27.2182	27.4013	27.3527	27.8901	26.9737	27.3962	0.0151336	-0.0120996	0.118974	0.116405	0.130346	-0.0959237
fadA	Possible acyl-CoA thiolase FadA	Function unknown, but involvement in lipid degradation.	O53871	Rv0859	Mb0882	lipid metabolism	42.414	23	78.4	0	323.31	30.749	30.9561	30.8088	31.0035	28.6546	30.7712	30.884	30.9729	31.1057	29.2203	30.8544	31.0148	0.340533	0.474791	0.0826446	-0.22008	0.468492	0.624376
Rv1875	Conserved protein	Function unknown	O07754	Rv1875	Mb1906	conserved hypotheticals	15.979	8	79.6	0	61.97	26.8347	27.1405	27.0579	25.6342	26.5863	26.9267	27.3322	26.9546	27.0023	27.2589	26.8839	27.5073	0.434016	-0.205669	0.911846	-0.83429	0.216019	-0.120353
Rv3485c	Probable short-chain type dehydrogenase/reductase	Function unknown; supposed to be involved in cellular metabolism.	O06348	Rv3485c	Mb3515c	intermediary metabolism and respiration	33.193	12	54.5	0	130.8	27.3775	26.2226	26.6017	26.6557	24.7982	27.4241	27.0253	26.5197	26.8939	26.7831	26.2482	27.4597	0.0689785	-0.0963802	0.249177	-0.537674	0.0150685	-0.0173702
Rv1894c	Conserved hypothetical protein	Function unknown	O07738	Rv1894c	Mb1927c	conserved hypotheticals	40.185	10	36.2	0	34.206	25.6943	24.4667	23.3044	25.5602	25.3344	25.3953	24.6165	25.0231	25.3159	24.4479	25.5069	25.2944	0.319805	-0.594586	0.452208	0.34691	0.0913762	-0.0979036
yrbE4A	Conserved integral membrane protein YrbE4A. Possible ABC transporter.	Unknown. Predicted to be involved in lipid catabolism.	O53546	Rv3501c	Mb3531c	virulence, detoxification, adaptation	26.639	4	17.3	0	12.329	23.3764	23.3715	23.666	23.6716	25.4493	23.7409	24.6298	23.0151	22.7213	24.964	24.1075	23.5872	0.840901	-0.74829	0.0323126	0.0676683	0.460726	-0.764168
serC	Possible phosphoserine aminotransferase SerC (PSAT)	Catalyzes the reversible interconversion of phosphoserine and 2-oxoglutarate to 3-phosphonooxypyruvate and glutamate. Require both in the major phosphorylated pathway of serine biosynthesis and in pyridoxine biosynthesis [catalytic activity: O-phospho-L-serine + 2-oxoglutarate = 3-phosphonooxypyruvate + L-glutamate].	P9WQ73	Rv0884c	Mb0908c	intermediary metabolism and respiration	40.233	13	54	0	323.31	31.74	31.7956	31.8871	31.8406	32.4148	31.9423	31.7954	31.7616	31.9391	32.2136	31.7169	31.5259	0.0177925	-0.0112139	0.383992	0.247086	0.0207178	0.0131823
fadB5	Possible oxidoreductase FadB5	Thought to be involved in fatty acid degradation. FADB and FADA are the alpha and beta subunits of the multifunctional enzyme complex of the fatty acid degradation cycle.	O07721	Rv1912c	Mb1947c	lipid metabolism	35.813	18	65	0	151.91	28.4833	28.4073	28.6464	28.6292	27.2932	28.8813	28.7689	28.678	28.7963	28.1346	28.1547	28.7188	0.360139	0.176274	0.0440248	-0.0681864	0.991081	0.411683
citA	Probable citrate synthase II CitA	Involved in tricarboxylic acid cycle (KREBS cycle) [catalytic activity: citrate + CoA = acetyl-CoA + H2O + oxaloacetate].	P9WPD3	Rv0889c	Mb0913c	intermediary metabolism and respiration	40.146	13	50.7	0	143.69	27.4998	24.3329	26.4496	27.8101	27.7997	27.8658	27.8304	27.0938	27.0727	28.2145	27.0461	26.7779	0.535888	-1.25208	0.469901	0.479019	0.00903015	-0.0138995
Rv3521	Conserved hypothetical protein	Function unknown	O53566	Rv3521	Mb3551	conserved hypotheticals	33.003	3	20.1	0	25.663	24.973	22.966	24.9106	25.1399	23.9591	24.7769	25.2593	24.1695	25.0192	25.3023	23.867	23.592	0.0114808	0.0294259	0.229262	0.371517	0.377693	0.562239
kshA	Oxygenase component of 3-ketosteroid-9-alpha-hydroxylase KshA	Predicted to be involved in lipid catabolism	P71875	Rv3526	Mb3556	intermediary metabolism and respiration	44.267	11	38.3	0	46.233	25.5309	25.478	25.2067	25.4599	25.9055	24.9422	25.3574	25.3509	25.6029	25.8973	25.0699	25.3985	0.0669614	-0.0500329	0.0174617	-0.0193405	0.0238604	-0.0181529
Rv1928c	Probable short-chain type dehydrogenase/reductase	Function unknown; probably involved in cellular metabolism.	P95286	Rv1928c	Mb1963c	intermediary metabolism and respiration	27.031	9	31	0	29.302	25.0918	23.9228	23.9076	23.7168	25.3635	24.0293	25.3329	25.1841	25.1777	25.2606	24.5802	24.729	0.548035	-0.549188	0.373962	-0.486734	0.816405	0.37499
ctpE	Probable metal cation transporter ATPase P-type CtpE	Metal cation-transporting ATPase; possibly catalyzes the transport of an undetermined metal cation with the hydrolysis of ATP [catalytic activity: ATP + H(2)O + undetermined metal cation(in) = ADP + phosphate + undetermined metal cation(out)].	P9WPT1	Rv0908	Mb0932	cell wall and cell processes	84.972	15	19.8	0	51.304	23.3166	23.6441	24.3696	24.6282	24.2621	25.2558	23.3406	23.3949	24.2185	23.5873	23.453	23.8948	0.144963	0.131718	1.54947	1.07032	0.00662976	0.0063165
Rv0913c	Possible dioxygenase	Function unknown; probably involved in cellular metabolism.	I6Y551	Rv0913c	Mb0937c	intermediary metabolism and respiration	56.638	10	36.3	0	32.913	25.6099	25.4131	25.5606	25.3535	23.6673	26.0676	25.4865	23.0806	25.8255	26.1877	23.9322	25.6227	0.154043	0.280302	0.0782003	-0.218096	0.153094	-0.450022
Rv3548c	Probable short-chain type dehydrogenase/reductase	Function unknown; supposed involvement in cellular metabolism.	P71853	Rv3548c	Mb3578c	intermediary metabolism and respiration	31.07	12	50.7	0	70.913	26.8225	27.2981	27.2346	27.1081	24.5072	26.7479	27.7116	27.3482	27.102	26.0107	26.7827	27.3417	0.418845	0.406686	0.261466	-0.590625	0.728715	0.675574
fadE32	Probable acyl-CoA dehydrogenase FadE32	Function unknown, but involved in lipid degradation.	P96845	Rv3563	Mb3593	lipid metabolism	33.416	7	42.3	0	70.368	25.161	25.5268	25.3408	25.1149	24.5412	23.5249	25.1927	24.0645	25.4445	25.9931	22.6293	25.2656	0.27938	0.713511	0.0736778	-0.2357	0.0870243	0.271215
Rv3587c	Probable conserved membrane protein	Function unknown	O53572	Rv3587c	Mb3618c	cell wall and cell processes	27.002	11	64.3	0	229.19	24.0941	23.2019	24.2633	23.5902	23.1721	22.9978	24.9847	24.2753	23.7626	25.1924	24.9457	24.6477	1.37579	-1.0755	2.682	-1.67522	0.690115	-0.587762
mhuD	Possible heme degrading protein MhuD	Possibly involved in heme degradation pathway. May be involved in iron storage.	P9WKH3	Rv3592	Mb3623	intermediary metabolism and respiration	11.185	6	89.5	0	226.14	30.1443	30.0266	29.952	29.8452	30.4881	29.7325	30.0334	29.4985	30.1934	29.9255	29.2092	29.8102	0.791577	0.392656	0.505151	0.373631	0.353804	0.260132
lsr2	Iron-regulated H-NS-like protein Lsr2	Dominant T-cell antigen and possibly stimulates lymphoproliferation. Has DNA-bridging activity.	P9WIP7	Rv3597c	Mb3628c	information pathways	12.098	8	40.2	0	65.634	30.8905	30.3808	30.4644	29.9698	30.2548	29.4331	29.809	29.8044	29.7513	31.1082	29.8452	30.5522	0.0671961	0.0766748	0.634307	-0.615972	0.91031	-0.713636
folB	Probable dihydroneopterin aldolase FolB (DHNA)	Involved in folate biosynthesis. Catalyzes the conversion of 7,8-dihydroneopterin to 6- hydroxymethyl-7,8-dihydropterin [catalytic activity: 2-amino-4-hydroxy-6-(D-erythro-1,2,3-trihydroxypropyl)-7,8-dihydropteridine = 2-amino-4-hydroxy-6-hydroxymethyl-7,8-dihydropteridine + glycolaldehyde].	P9WNC5	Rv3607c	Mb3637c	intermediary metabolism and respiration	14.552	6	47.4	0	39.562	25.2908	25.4296	25.382	25.2687	25.4192	25.3943	25.3853	25.5556	25.299	25.7482	24.5275	25.3627	0.16009	0.154638	0.152048	0.147975	0.211254	0.200541
pstS3	Periplasmic phosphate-binding lipoprotein PstS3 (PBP-3) (PstS3) (PHOS1)	Involved in active transport of inorganic phosphate across the membrane (import). This is one of the proteins required for binding-protein-mediated phosphate transport.	P9WGT7	Rv0928	Mb0951	cell wall and cell processes	37.953	18	62.7	0	323.31	23.99	28.1671	28.172	28.3081	29.2314	28.9797	27.403	28.241	27.9934	28.9897	26.4322	27.9695	0.257101	-1.02077	0.587079	1.0426	0.0354063	0.082002
vapC45	Conserved protein	Unknown	O53465	Rv2019	Mb2042	conserved hypotheticals	15.511	6	50.7	0	49.137	24.1839	23.2349	24.4365	23.9493	24.4674	23.9444	23.499	24.1559	23.2932	25.5877	22.8655	24.472	0.153017	-0.356658	0.0821745	-0.188012	0.32558	-0.65903
pstS2	Periplasmic phosphate-binding lipoprotein PstS2 (PBP-2) (PstS2)	Involved in active transport of inorganic phosphate across the membrane (import). This is one of the proteins required for binding-protein-mediated phosphate transport.	P9WGT9	Rv0932c	Mb0956c	cell wall and cell processes	37.864	13	68.4	0	323.31	23.2173	26.6967	25.937	26.6647	27.8758	28.0279	24.8178	26.85	24.5413	27.8816	26.4216	26.9135	0.71731	-1.78857	0.301035	0.450535	0.923112	-1.66923
galE1	UDP-glucose 4-epimerase GalE1 (galactowaldenase) (UDP-galactose 4-epimerase) (uridine diphosphate galactose 4-epimerase) (uridine diphospho-galactose 4-epimerase)	Involved in galactofuranosyl biosynthesis: converts UDO-GlcP to UDP-GalP [catalytic activity: UDP-glucopyranose = UDP-galactopyranose].	P9WN67	Rv3634c	Mb3658c	intermediary metabolism and respiration	33.581	18	68.2	0	323.31	28.933	29.3487	29.386	29.4809	29.6825	29.0406	29.322	29.5604	29.5815	29.9273	29.0416	29.188	0.20279	-0.163055	0.0156038	0.0156892	0.131315	0.102296
acg	Conserved protein Acg	Unknown. May have a role for bacteria within the host environment.	P9WIZ9	Rv2032	Mb2058	conserved hypotheticals	36.575	32	84.6	0	323.31	30.6471	30.7108	30.5824	30.3413	28.4906	30.3912	30.4494	30.655	31.1062	29.979	30.6551	30.8186	0.247713	0.162532	0.477054	-0.743233	0.32187	0.252615
Rv2037c	Conserved transmembrane protein	Unknown	L0TB61	Rv2037c	Mb2063c	cell wall and cell processes	34.688	12	58.6	0	323.31	23.2047	23.7354	22.7995	23.2192	23.4103	24.6304	22.9998	23.4675	25.0947	24.0978	24.3758	24.2248	1.59966	-0.986273	0.460992	-0.47952	0.232297	-0.378809
Rv2052c	Conserved protein	Unknown	O53494	Rv2052c	Mb2078c	conserved hypotheticals	55.853	17	51.3	0	158.17	27.3758	27.5313	27.5107	27.3727	27.9854	27.9212	27.7713	27.6664	27.5316	28.2668	27.5908	27.3647	0.414322	-0.268195	0.0189626	0.0190118	0.10892	-0.0842908
Rv3669	Probable conserved transmembrane protein	Unknown	O69637	Rv3669	Mb3693	cell wall and cell processes	18.919	7	43	0	59.854	25.9442	25.7451	25.8181	25.5333	25.5818	25.8627	25.4849	23.8652	25.4862	26.7965	26.0943	26.5481	1.40445	-0.643845	1.63135	-0.820388	1.24637	-1.5342
lppJ	Lipoprotein LppJ	Unknown	P9WK77	Rv2080	Mb2106	cell wall and cell processes	20.324	6	64.7	0	50.014	24.4052	24.3592	24.5584	24.4212	25.3734	23.1547	24.9206	23.608	23.0467	23.373	25.1891	25.1115	0.0685286	-0.116912	0.0990057	-0.2414	0.358773	-0.699434
pafB	Proteasome accessory factor B PafB	Unknown	P9WIM1	Rv2096c	Mb2123c	intermediary metabolism and respiration	35.3	15	61.7	0	127.51	27.3107	27.1192	27.5259	27.0864	23.4814	27.4398	27.5592	27.2289	27.4572	26.0236	27.143	27.4237	0.44037	0.455151	0.256391	-0.860947	0.557538	0.551618
vapC37	Possible toxin VapC37. Contains PIN domain.	Unknown	O53501	Rv2103c	Mb2129c	virulence, detoxification, adaptation	15.662	3	20.8	0	6.9746	24.4207	24.5793	24.4361	24.8397	24.3732	23.7353	24.8667	24.5934	24.4629	24.4395	24.8287	24.9341	0.73813	-0.255409	0.519061	-0.418041	0.1852	-0.0930748
accD2	Probable acetyl-/propionyl-CoA carboxylase (beta subunit) AccD2	Involved in fatty acid metabolism.	O86318	Rv0974c	Mb0999c	lipid metabolism	56.256	13	40.8	0	52.734	25.977	25.7468	26.2431	26.175	26.0716	26.231	26.1644	25.9469	26.2383	25.927	26.2204	25.919	0.0663619	-0.0331879	0.553763	0.137033	0.288426	0.0943991
Rv3683	Conserved protein	Function unknown	I6X827	Rv3683	Mb3708	conserved hypotheticals	34.394	17	69.6	0	205.68	25.0269	23.2252	24.0499	22.4641	24.1878	25.1069	25.9643	23.0796	24.8627	23.6973	23.9646	24.4852	0.0305321	0.0516675	0.0552423	-0.129434	0.269285	0.586535
Rv3688c	Conserved protein	Function unknown	I6X831	Rv3688c	Mb3713c	conserved hypotheticals	16.701	7	66.9	0	78.548	26.1382	26.4526	26.4255	27.3715	27.2794	26.6921	26.497	26.8458	26.4817	27.0652	26.924	26.8137	2.0621	-0.595542	0.329498	0.180032	1.10017	-0.326141
lppL	Probable conserved lipoprotein LppL	Unknown	O06237	Rv2138	Mb2162	cell wall and cell processes	36.836	15	73.2	0	209.7	23.3508	24.2802	23.9276	24.7116	22.712	22.4152	22.8439	23.9436	24.5104	24.2804	23.9824	24.2792	0.495903	-0.327829	0.547578	-0.901112	0.344134	-0.414737
Rv1006	Unknown protein	Unknown	O05592	Rv1006	Mb1033	conserved hypotheticals	61.287	32	77.8	0	323.31	24.1914	23.2115	22.6763	24.1806	25.1266	24.3819	23.2261	23.2784	24.9623	24.5189	23.2868	23.8231	0.38144	-0.516522	0.681199	0.686734	0.0269249	-0.0539799
ftsZ	Cell division protein FtsZ	Essential for cell division. It is thought that the intracellular concentration of FTSZ protein is critical for productive septum formation in mycobacteria.	P9WN95	Rv2150c	Mb2174c	cell wall and cell processes	38.755	18	62	0	289.88	28.0208	27.2468	27.589	27.685	27.2289	27.7679	27.5704	27.0998	27.6371	27.8424	27.3201	28.0215	0.130519	-0.109116	0.246065	-0.167387	0.468678	-0.292215
pks16	Putative polyketide synthase Pks16	Potentially involved in some intermediate steps for the synthesis of a polyketide molecule which may be involved in secondary metabolism.	O05598	Rv1013	Mb1041	lipid metabolism	58.467	10	20.4	0	24.861	23.7943	23.7117	23.8147	23.5305	22.8486	23.8267	24.0078	21.9786	23.6676	23.7162	23.726	22.9218	0.522456	0.31894	0.0458231	-0.0527363	0.127268	-0.236622
Rv3718c	Conserved protein	Function unknown	I6XI16	Rv3718c	Mb3745c	conserved hypotheticals	15.662	14	86.4	0	247.91	30.4	30.7231	30.4485	30.434	30.9011	30.2186	30.2277	30.3005	30.2901	30.6645	30.4179	30.7016	0.203495	-0.0708256	0.127841	-0.0767612	1.60514	-0.321889
aroG	3-deoxy-D-arabino-heptulosonate 7-phosphate synthase AroG (DAHP synthetase, phenylalanine-repressible)	Chorismate biosynthesis	O53512	Rv2178c	Mb2200c	intermediary metabolism and respiration	50.655	29	85.7	0	323.31	30.6965	30.2741	30.3759	29.7208	25.1683	30.712	30.693	30.1027	30.4583	25.9308	30.827	30.6786	0.333141	1.30336	0.0930936	-0.611764	0.323017	1.27253
Rv2183c	Conserved protein	Unknown	O53517	Rv2183c	Mb2205c	conserved hypotheticals	13.354	8	70.2	0	119.36	23.532	23.8327	23.4252	23.702	23.6775	24.7578	24.639	24.1007	24.2974	23.1961	23.4339	24.1789	0.00652498	-0.00636673	0.40547	0.442797	1.04075	0.742729
ctaE	Probable cytochrome C oxidase (subunit III) CtaE	Thought to be involved in aerobic respiration.	P9WP67	Rv2193	Mb2216	intermediary metabolism and respiration	22.42	3	10.8	0	24.743	23.1866	24.4164	23.9524	23.6002	23.2677	25.3014	23.7279	24.9993	22.1691	24.5806	22.345	22.7286	0.336395	0.633763	0.376433	0.838381	0.143491	0.414059
mmpS3	Probable conserved membrane protein MmpS3	Unknown	P9WJT1	Rv2198c	Mb2221c	cell wall and cell processes	30.955	9	51.8	0	323.31	23.0046	22.9537	23.9648	24.5329	24.2217	24.33	24.1347	23.673	24.8921	23.8014	24.1233	23.1162	0.348922	-0.37257	1.02976	0.68128	0.525221	0.553024
Rv3755c	Conserved protein	Function unknown	O86358	Rv3755c	Mb3781c	conserved hypotheticals	22.002	12	71.4	0	57.973	27.0726	27.5571	27.2689	27.235	27.6188	27.285	27.5071	27.5385	27.3163	27.6205	27.0355	27.2844	0.0211056	-0.0139446	0.115534	0.0661221	0.313575	0.140526
echA21	Possible enoyl-CoA hydratase EchA21 (enoyl hydrase) (unsaturated acyl-CoA hydratase) (crotonase)	Could possibly oxidize fatty acids using specific components [catalytic activity: (3S)-3-hydroxyacyl-CoA = trans-2(or 3)-enoyl-CoA + H(2)O].	P75019	Rv3774	Mb3803	lipid metabolism	29.101	21	90.1	0	323.31	31.8544	31.8902	31.9251	31.8703	30.6612	31.6971	31.7762	31.7154	31.8603	31.1638	31.5714	31.9017	0.736268	0.344278	0.113893	-0.136095	0.475352	0.238336
Rv3779	Probable conserved transmembrane protein alanine and leucine rich	Unknown	P72045	Rv3779	Mb3808	cell wall and cell processes	71.794	11	26.6	0	46.412	23.7261	22.618	23.9764	23.6919	24.7648	23.6481	23.4191	24.0842	23.2728	24.919	24.0163	22.8898	0.280201	-0.501522	0.0461214	0.0932147	0.212743	-0.349676
Rv1059	Conserved protein	Function unknown	O53407	Rv1059	Mb1088	conserved hypotheticals	36.91	10	35.6	0	39.923	25.9959	25.727	26.3904	26.2237	23.4919	26.7851	26.4905	26.1347	26.0404	24.0106	26.2329	26.2405	0.285877	0.543123	0.00144803	0.0055879	0.409218	0.727215
Rv2203	Possible conserved membrane protein	Unknown	P9WLI7	Rv2203	Mb2226	cell wall and cell processes	24.371	11	44.8	0	63.536	26.8687	23.6524	23.622	22.6383	25.0916	25.5076	24.7548	24.7236	24.4348	24.7443	24.0586	26.7819	0.130599	-0.480573	0.256588	-0.782456	0.270787	-0.557189
ilvE	Branched-chain amino acid transaminase IlvE	Thought to catalyze the first reaction in the catabolism of the essential branched chain amino acids leucine, isoleucine, and valine [catalytic activity: L-leucine + 2-oxoglutarate = 4-methyl-2-oxopentanoate + L-glutamate].	P9WQ75	Rv2210c	Mb2233c	intermediary metabolism and respiration	39.666	21	76.6	0	234.29	29.7761	29.765	29.7169	29.7877	30.1579	29.711	29.8647	30.1971	29.8958	30.0951	30.0117	29.7468	0.866776	-0.198528	0.140306	-0.0657164	0.0820964	0.0346464
dprE1	Decaprenylphosphoryl-beta-D-ribose 2'-oxidase	Together with DPRE2|Rv3791, catalyzes epimerization of decaprenylphosphoryl ribose (DPR) to decaprenylphosphoryl arabinose (DPA) in arabinan synthesis	P9WJF1	Rv3790	Mb3819	lipid metabolism	50.163	25	69.6	0	199.09	27.7001	27.1656	27.2231	27.2096	24.4505	27.4428	27.1092	24.8093	27.1898	26.8976	27.4737	27.636	0.0326129	0.027146	0.417869	-0.968132	0.523178	-0.966325
Rv1069c	Conserved protein	Function unknown	O53417	Rv1069c	Mb1098c	conserved hypotheticals	64.341	18	47.7	0	284.93	24.1854	24.2533	24.2747	23.5265	24.7319	24.1675	25.0837	23.9466	24.0523	24.2524	23.1757	23.8949	0.660663	0.463437	0.320245	0.367613	0.537463	0.586493
Rv2216	Conserved protein	Unknown	P9WGP7	Rv2216	Mb2239	conserved hypotheticals	31.671	20	93	0	323.31	24.8771	25.9069	24.1182	25.8543	25.2047	27.6265	24.25	26.4886	26.3394	27.1409	26.1162	26.1403	1.13919	-1.49841	0.107269	-0.237305	0.411969	-0.773114
fadA3	Probable beta-ketoacyl CoA thiolase FadA3	Function unknown, but supposedly involved in lipid degradation (beta oxidation).	O53422	Rv1074c	Mb1103c	lipid metabolism	42.655	32	95.6	0	323.31	32.2962	32.3762	32.3791	32.3993	30.0873	32.2899	32.3254	32.4336	32.3586	31.0601	32.3021	32.376	0.438931	0.437739	0.136719	-0.320566	0.464374	0.459775
embB	Integral membrane indolylacetylinositol arabinosyltransferase EmbB (arabinosylindolylacetylinositol synthase)	Involved in the biosynthesis of the mycobacterial cell wall arabinan and resistance to ethambutol (EMB; dextro-2,2'-(ethylenediimino)-DI-1-butanol). Polymerizes arabinose into the arabinan of arabiogalactan [catalytic activity: UDP-L-arabinose + indol-3-ylacetyl-myo-inositol = UDP + indol-3-ylacetyl-myo-inositol L-arabinoside].	P9WNL7	Rv3795	Mb3824	cell wall and cell processes	118.02	26	34	0	134.77	23.4071	23.9566	25.0209	24.3055	23.7602	25.0374	24.2571	22.5588	23.0755	24.3975	23.9728	23.0053	0.207255	0.336353	0.447248	0.57585	0.310796	-0.494743
glnA2	Probable glutamine synthetase GlnA2 (glutamine synthase) (GS-II)	Involved in glutamine biosynthesis [catalytic activity: ATP + L-glutamate + NH(3) = ADP + glutamine + orthophosphate].	P9WN37	Rv2222c	Mb2246c	intermediary metabolism and respiration	49.607	24	77.1	0	323.31	29.5242	28.9967	28.8687	29.3423	27.4916	29.8311	29.4962	29.1701	29.3865	29.7323	29.6939	29.7264	1.36598	-0.587662	0.509698	-0.829198	1.71775	-0.36661
metB	Cystathionine gamma-synthase MetB (CGS) (O-succinylhomoserine [thiol]-lyase)	Involved in methionine biosynthesis: converts O-succinyl-L-homoserine to cystathionine [catalytic activity: O-succinyl-L-homoserine + L-cysteine = cystathionine + succinate (can also use hydrogen sulfide and methanethiol as substrates)].	P9WGB7	Rv1079	Mb1108	intermediary metabolism and respiration	40.982	14	52.3	0	254.89	28.5813	28.3116	28.1706	28.5721	29.2558	28.2993	28.7529	28.2465	28.9858	28.858	28.226	28.5518	0.364176	-0.19072	0.184925	0.163813	0.152946	0.116493
pks13	Polyketide synthase Pks13	Involved in the final steps of mycolic acid biosynthesis. Catalyses the condensation of two fatty acyl chains.	I6X8D2	Rv3800c	Mb3830c	lipid metabolism	186.46	85	70.2	0	323.31	30.6369	29.9886	29.9413	29.7914	29.4088	30.3509	29.9939	29.5961	30.0823	29.8378	30.4473	30.3842	0.0391811	-0.0341771	0.483676	-0.372721	0.609468	-0.332312
Rv3806c	Decaprenylphosphoryl-5-phosphoribose (DPPR) synthase (decaprenyl-phosphate 5-phosphoribosyltransferase)	Involved in arabinogalactan synthesis [catalytic activity: phosphoribose diphosphate + decaprenyl phosphate = decaprenylphosphoryl-5-phosphoribose + diphosphate]	P9WFR5	Rv3806c	Mb3836c	cell wall and cell processes	32.654	9	32.5	0	75.924	23.9332	24.1981	23.9042	22.6511	25.656	23.8369	23.2364	24.1751	24.7162	24.3074	23.4403	24.5785	0.0975702	-0.0969226	0.0215851	-0.0607491	0.0408071	-0.0662053
ahpE	Probable peroxiredoxin AhpE	Detoxification of organic peroxides.	P9WIE3	Rv2238c	Mb2262c	virulence, detoxification, adaptation	16.819	7	75.8	0	29.201	26.5421	26.7035	26.2778	26.4607	25.0076	26.3919	26.2402	26.3251	26.036	25.3508	26.2398	26.1973	0.853431	0.578499	0.0143827	0.0241083	0.376791	0.271158
desA2	Possible acyl-[acyl-carrier protein] desaturase DesA2 (acyl-[ACP] desaturase) (stearoyl-ACP desaturase)	Thought to catalyze the principal conversion of saturated fatty acids to unsaturated fatty acids. Thought to convert stearoyl-ACP to oleoyl-ACP by introduction of a cis double bond between carbons delta-9 and delta-10 of the acyl chain [catalytic activity: stearoyl-[acyl-carrier protein] + AH2 + O2 = oleoyl-[acyl-carrier protein] + a + 2 H2O].	P9WNZ5	Rv1094	Mb1124	lipid metabolism	31.359	26	92.4	0	323.31	33.1054	32.9026	32.8072	32.7777	31.7621	33.086	32.9516	32.6056	32.8856	32.3085	33.1461	33.1406	0.0893616	0.073321	0.264785	-0.323109	0.059036	-0.0507774
fabD	Malonyl CoA-acyl carrier protein transacylase FabD (malonyl CoA:ACPM acyltransferase) (MCT)	Catalyzes malonyl-CoA-ACP transacylase (MCAT) activity using holo-ACPM as substrate for transacylation [catalytic activity: malonyl-CoA + [acyl-carrier protein] = CoA + malonyl-[acyl-carrier protein]].	P9WNG5	Rv2243	Mb2267	lipid metabolism	30.788	13	84.8	0	253.97	27.3697	27.2801	27.7754	26.7098	23.7814	27.4186	27.4721	27.7083	27.2892	26.8443	27.0024	27.5211	0.621602	0.35247	0.436439	-1.15269	0.705085	0.367255
Rv1100	Conserved protein	Function unknown	O53448	Rv1100	Mb1130	conserved hypotheticals	24.562	10	60.9	0	313.94	23.0609	24.305	24.5676	23.7622	22.6309	25.5795	23.5809	23.7887	24.2721	25.0434	24.2771	23.9953	0.339985	-0.460773	0.187123	-0.447707	0.677614	-0.558043
Rv3816c	Possible acyltransferase	Function unknown; probably involved in cellular metabolism.	O07807	Rv3816c	Mb3846c	intermediary metabolism and respiration	28.454	8	36.7	0	10.161	24.9478	23.4907	24.242	24.6857	24.6162	25.1735	24.0844	25.37	22.4556	24.4502	24.4009	24.5557	0.223397	-0.242096	0.918083	0.356197	0.23178	-0.498915
Rv1112	Probable GTP binding protein	Unknown	O53459	Rv1112	Mb1142	conserved hypotheticals	38.111	13	54.1	0	19.993	24.0135	23.4561	23.5638	24.2094	23.8289	26.1107	25.6342	24.0951	26.1175	23.3136	22.6257	25.3572	0.0354271	-0.0877101	0.367357	0.950851	0.673728	1.51678
Rv2257c	Conserved protein	Unknown	O53531	Rv2257c	Mb2281c	conserved hypotheticals	28.385	11	64.3	0	152.78	27.2077	27.0497	27.2162	26.898	27.3903	27.3231	27.6055	27.2633	27.4993	27.8179	27.0052	27.3682	0.423132	-0.239235	0.276121	-0.193268	0.0813762	0.0589434
zwf1	Probable glucose-6-phosphate 1-dehydrogenase Zwf1 (G6PD)	Involved in pentose phosphate pathway (first step) [catalytic activity: D-glucose 6-phosphate + NADP(+) = D-glucono-1,5-lactone 6-phosphate + NADPH.]	P9WN71	Rv1121	Mb1152	intermediary metabolism and respiration	52.173	28	70.8	0	144.75	27.7322	27.9051	27.8328	28.0346	23.0201	27.699	27.7715	27.8178	27.7936	26.5319	27.5887	27.8061	0.577637	0.514444	0.251862	-1.05767	0.544875	0.485395
bfrB	Bacterioferritin BfrB	Involved in iron storage; ferritin is an intracellular molecule that stores iron in a soluble, nontoxic, readily available form. The functional molecule, which is composed of 24 chains, is roughly spherical and contains a central cavity in which the polymeric ferric iron core is deposited.	P9WNE5	Rv3841	Mb3871	intermediary metabolism and respiration	20.442	14	74.6	0	320.33	30.6394	31.1552	30.6354	31.7512	30.5165	30.7951	30.6196	31.0126	30.2231	30.1762	30.444	30.6567	0.801729	0.384392	0.678091	0.595331	0.292346	0.192818
Rv1126c	Conserved protein	Function unknown	O06578	Rv1126c	Mb1157c	conserved hypotheticals	22.197	12	66.7	0	94.133	26.7764	26.6565	26.8621	26.884	23.2624	26.417	26.7826	26.6794	26.7226	26.0863	26.8395	27.0604	0.1252	0.102889	0.41283	-1.14096	0.0785636	0.0660674
Rv2280	Probable dehydrogenase	Oxidoreduction	P9WIT1	Rv2280	Mb2301	intermediary metabolism and respiration	48.051	21	67.5	0	323.31	30.973	31.275	31.1888	31.1383	31.7699	31.0398	31.1315	31.0488	31.2973	31.6879	31.3214	31.0892	0.489926	-0.220503	0.0604648	-0.0501442	0.474897	-0.206917
hns	Possible histone-like protein Hns	Function unknown	I6YHB0	Rv3852	Mb3882	information pathways	13.823	4	29.9	0	33.259	24.068	24.3617	24.3988	23.6112	27.1743	25.2745	22.8458	22.6127	24.8708	25.4358	24.1149	24.9894	0.640864	-0.57053	0.174539	0.506594	0.795286	-1.40361
gltD	Probable NADH-dependent glutamate synthase (small subunit) GltD (L-glutamate synthase) (L-glutamate synthetase) (NADH-glutamate synthase) (glutamate synthase (NADH)) (GLTS beta chain) (NADPH-GOGAT)	Probably involved in glutamate biosynthesis [catalytic activity: 2 L-glutamate + NAD(+) = L-glutamine + 2-oxoglutarate + NADH].	P9WN19	Rv3858c	Mb3888c	intermediary metabolism and respiration	53.401	36	74	0	323.31	30.0922	29.9683	30.0922	30.0345	28.9682	29.6409	29.9392	30.0575	29.8961	30.3949	29.9589	30.0012	0.176681	-0.067426	0.770776	-0.570449	0.451424	-0.154069
Rv1147	Conserved protein	Function unknown	O06547	Rv1147	Mb1178	conserved hypotheticals	23.404	6	41.7	0	14.473	24.3247	22.9213	24.0743	23.787	24.0248	23.6427	22.8885	24.2903	23.6511	24.3356	22.6676	23.6788	0.11933	0.212739	0.199144	0.257509	0.0261383	0.0492897
Rv3863	Unknown alanine rich protein	Unknown	P96214	Rv3863	Mb3893	conserved hypotheticals	41.087	10	29.8	0	27.24	26.567	26.5639	26.8968	26.6409	26.1532	26.2904	26.3692	26.4861	26.3466	26.2668	26.1787	26.4956	1.1722	0.362228	0.0989292	0.0477861	0.347186	0.086937
eccA1	ESX conserved component EccA1. ESX-1 type VII secretion system protein.	Function unknown	P9WPH9	Rv3868	Mb3898	cell wall and cell processes	62.453	21	46.2	0	213.25	27.4823	26.2288	26.4732	26.1613	24.9958	27.3827	27.0448	25.8844	26.8007	26.3324	27.2115	27.4076	0.193725	-0.255732	0.453182	-0.803926	0.349362	-0.4072
espB	Secreted ESX-1 substrate protein B, EspB. Conserved alanine and glycine rich protein	Function unknown. Is a proteolytic substrate of MYCP1|Rv3883c.	P9WJD9	Rv3881c	Mb3911c	cell wall and cell processes	47.719	24	68.9	0	323.31	28.6113	28.682	28.6875	28.8977	28.174	28.4232	28.5364	28.4081	28.7814	26.8787	28.5119	28.3388	0.654862	0.750495	0.452918	0.588507	0.557307	0.66551
mycP2	Probable alanine and proline rich membrane-anchored mycosin MycP2 (serine protease) (subtilisin-like protease) (subtilase-like) (mycosin-2)	Thought to have proteolytic activity.	O05458	Rv3886c	Mb3916c	intermediary metabolism and respiration	55.594	14	45.8	0	323.31	23.0851	24.143	23.4999	24.6953	24.1024	25.3818	23.3675	23.5068	24.4567	23.7976	23.3059	23.4613	0.05521	0.0544421	1.41313	1.20491	0.275936	0.255421
cut2	Probable cutinase Cut2	Hydrolysis of cutin (a polyester that forms the structure of plant cuticle).	P9WP41	Rv2301	Mb2323	cell wall and cell processes	23.926	3	24.8	0	11.551	22.654	24.0618	23.6779	25.0396	23.4444	24.0669	22.8208	23.5063	23.8076	23.5448	23.9486	22.1551	0.133204	0.248395	0.60701	0.967464	0.0938551	0.162093
fadD21	Probable fatty-acid-AMP ligase FadD21 (fatty-acid-AMP synthetase) (fatty-acid-AMP synthase)	Function unknown, but supposedly involved in lipid degradation.	P9WQ49	Rv1185c	Mb1217c	lipid metabolism	62.756	26	55.4	0	150.46	23.3113	24.6026	27.2752	24.0384	23.2128	25.0202	27.9554	27.5693	26.9365	24.3113	26.1886	26.474	0.166064	-0.594881	0.850456	-1.56749	1.16153	1.82914
Rv1192	Unknown protein	Unknown	O05294	Rv1192	Mb1224	conserved hypotheticals	30.212	6	33.5	0	112.79	23.6209	22.4551	23.9948	24.0175	25.0288	22.5497	22.4999	22.1336	24.1028	23.3007	23.8233	23.6866	0.193302	-0.24662	0.130679	0.261843	0.480985	-0.691408
mviN	Probable conserved transmembrane protein	Unknown	P9WJK3	Rv3910	Mb3940	cell wall and cell processes	123.56	33	40.9	0	323.31	27.8447	27.1353	26.9126	25.4832	26.1623	27.454	27.021	27.1921	27.5327	27.0497	25.7642	27.8767	0.232738	0.400678	0.248959	-0.530377	0.216193	0.35177
dapE	Probable succinyl-diaminopimelate desuccinylase DapE	Involved in biosynthesis of diaminopimelate and lysine from aspartate semialdehyde (at the fifth step) [catalytic activity: N-succinyl-ll-2,6-diaminoheptanedioate + H2O = succinate + ll-2,6-diaminoheptanedioate]	P9WHS9	Rv1202	Mb1234	intermediary metabolism and respiration	37.273	18	55.4	0	183.46	27.9701	28.0863	28.1739	28.0989	27.637	28.1394	28.6072	27.9741	28.0259	28.3508	27.9379	28.1515	0.202945	-0.0699755	0.397267	-0.188335	0.0836641	0.0556285
folP2	Dihydropteroate synthase 2 FolP2 (DHPS 2) (dihydropteroate pyrophosphorylase 2)	Involved in dihydrofolate biosynthesis [catalytic activity: 2-amino-4-hydroxy-6-hydroxymethyl-7,8-dihydropteridine diphosphate + 4-aminobenzoate = diphosphate + dihydropteroate]	P9WNC9	Rv1207	Mb1239	intermediary metabolism and respiration	33.045	9	35.5	0	26.059	23.7024	24.8321	23.6421	23.5243	23.7024	23.1463	24.6315	24.9075	23.6211	22.6807	22.7089	23.6058	1.0114	1.06038	0.594763	0.459192	1.31311	1.38825
Rv1218c	Probable tetronasin-transport ATP-binding protein ABC transporter	Thought to be involved in active transport of tetronasin across the membrane (export): tetronasin resistance by an export mechanism. Responsible for energy coupling to the transport system.	O86311	Rv1218c	Mb1250c	cell wall and cell processes	33.448	7	27.3	0	22.237	25.2199	23.6758	25.2466	24.5785	23.4134	24.2704	24.7089	23.7081	25.0361	24.2759	24.7828	23.1376	0.383538	0.648656	0.0121508	0.0220203	0.265944	0.41896
lpqY	Probable sugar-binding lipoprotein LpqY	Thought to be involved in active transport of sugar across the membrane (import).	P9WGU9	Rv1235	Mb1267	cell wall and cell processes	49.793	19	59	0	277.14	23.4231	23.6812	23.258	24.8012	23.518	23.0523	24.4686	23.5238	23.8926	23.6536	23.6207	23.8768	0.82875	-0.262954	0.0475832	0.0735016	0.355303	0.244618
Rv2326c	Possible transmembrane ATP-binding protein ABC transporter	Probably involved in active transport accross the membrane. Thought to be responsible for energy coupling to the transport system and the translocation of the substrate across the membrane.	P9WQI7	Rv2326c	Mb2353c	cell wall and cell processes	72.835	9	15.1	0	64.76	23.6196	24.0041	23.2176	24.9089	24.4889	23.1891	23.4941	23.9361	23.8866	24.9798	23.8216	23.8675	0.620229	-0.6092	0.014115	-0.0273571	0.485839	-0.450717
relE	Toxin RelE	Function unknown	O50461	Rv1246c	Mb1278c	virulence, detoxification, adaptation	11.064	3	29.9	0	21.41	23.479	23.0232	23.1245	23.2128	24.3656	22.9348	24.0429	23.978	24.3199	23.5781	24.5207	23.9388	1.22796	-0.80359	0.418719	-0.50812	0.125976	0.101089
cysE	Probable serine acetyltransferase CysE (sat)	Involved in cysteine biosynthesis [catalytic activity: acetyl-CoA + L-serine = CoA + O-acetyl-L-serine].	P95231	Rv2335	Mb2363	intermediary metabolism and respiration	23.77	3	26.2	0	49.95	23.8822	23.4669	23.123	23.8468	21.5657	25.1487	25.4904	23.2222	23.912	25.0117	23.7842	23.7758	0.683619	-0.699898	0.234059	-0.670161	0.00734571	0.0175991
lprE	Probable lipoprotein LprE	Unknown	P9WK49	Rv1252c	Mb1284c	cell wall and cell processes	20.442	6	53.5	0	11.834	24.7925	24.8611	23.1469	24.2959	23.4501	24.0335	24.2443	23.3239	24.2068	24.0808	24.0987	23.7601	0.192683	0.286983	0.0682228	-0.0533536	0.0593376	-0.0548585
Rv2345	Possible conserved transmembrane protein	Unknown	P9WFJ5	Rv2345	Mb2374	cell wall and cell processes	70.029	33	67.7	0	323.31	26.9108	25.2099	25.3041	25.6693	23.403	25.7268	26.2784	24.3774	24.6903	23.2303	24.8282	25.9332	0.524585	1.14433	0.087181	0.269091	0.174439	0.451446
amiB2	Probable amidase AmiB2 (aminohydrolase)	Involved in cellular metabolism, active on 2- to 6- carbon aliphatic amides and on many aromatic amides [catalytic activity: a monocarboxylic acid amide + H(2)O = a monocarboxylate + NH(3)].	P9WQ97	Rv1263	Mb1294	intermediary metabolism and respiration	49.08	6	17.7	0	13.046	24.0636	23.4449	24.3437	23.0931	23.8613	22.9881	23.7168	23.3206	24.6165	24.5137	23.6186	23.6866	0.00932381	0.0110893	0.718294	-0.625488	0.0389603	-0.0549889
zur	Probable zinc uptake regulation protein Zur	Acts as a global negative controlling element, employing Zn(2+) as a cofactor to bind the operator of the repressed genes.	P9WN85	Rv2359	Mb2380	regulatory proteins	14.417	5	47.7	0	138.47	26.7823	26.9165	26.9803	26.877	27.6686	26.4917	26.8005	26.6481	26.7608	27.4304	26.4382	26.7438	0.0248967	0.0222454	0.113179	0.141661	0.171103	-0.134342
Rv2366c	Probable conserved transmembrane protein	Function unknown	P9WFP1	Rv2366c	Mb2387c	cell wall and cell processes	47.213	6	20.2	0	18.751	23.5543	23.6843	25.5042	23.9707	24.1036	24.0395	23.991	24.8127	23.7512	23.2049	23.8629	23.8553	0.382979	0.606565	0.831104	0.396918	0.630858	0.543961
oppB	Probable oligopeptide-transport integral membrane protein ABC transporter OppB	Involved in active transport of oligopeptide across the membrane (import). Responsible for the translocation of the substrate across the membrane.	P9WFZ7	Rv1283c	Mb1314c	cell wall and cell processes	35.083	4	14.8	0	8.6167	23.3169	23.6322	23.6917	23.9575	25.046	23.907	23.605	22.8442	23.2158	24.2973	23.9165	24.5896	1.47307	-0.720877	0.0285954	0.0357005	1.62842	-1.04617
hom	Probable homoserine dehydrogenase ThrA	Involved in the conversion of L-aspartate to homoserine (third step). Homoserine participates in the biosynthesis of threonine and then isoleucine and in the biosynthesis of methionine [catalytic activity: L-homoserine + NAD(P)(+) = L-aspartate 4-semialdehyde + NAD(P)H.]	P9WPX1	Rv1294	Mb1326	intermediary metabolism and respiration	45.552	15	44.9	0	91.124	26.135	23.6603	24.9819	25.6361	24.0276	26.0221	25.919	23.2301	25.7117	25.7322	26.3291	25.9098	0.653968	-1.06464	0.527161	-0.761773	0.515871	-1.03679
ggtB	Probable gamma-glutamyltranspeptidase precursor GgtB (gamma-glutamyltransferase) (glutamyl transpeptidase)	Plays a key role in the gamma-glutamyl cycle, a pathway for the synthesis and degradation of glutathione [catalytic activity: 5-L-glutamyl)-peptide + an amino acid = peptide + 5-L-glutamyl-amino acid].	P71750	Rv2394	Mb2415	intermediary metabolism and respiration	66.531	27	56	0	323.31	22.8989	23.6262	24.3793	24.5413	24.3687	24.741	23.7632	24.1132	25.2019	24.1608	23.799	24.1146	0.368912	-0.390005	1.54709	0.525517	0.304064	0.334598
Rv1301	Conserved protein	Function unknown	P9WGC9	Rv1301	Mb1333	conserved hypotheticals	22.57	9	76.5	0	101.87	27.3768	27.3871	27.2348	27.1433	27.2659	27.975	27.6975	28.0655	27.457	26.1831	28.3045	27.246	0.0493389	0.0883478	0.118771	0.216826	0.318381	0.495447
glgE	M1P-dependent maltosyltransferase GlgE	Function unknown; probably involved in polysaccharides degradation.	P9WQ17	Rv1327c	Mb1362c	intermediary metabolism and respiration	78.639	32	71	0	323.31	29.505	28.079	28.046	29.0477	24.8251	28.8719	28.9091	27.8306	28.4011	29.0786	29.1831	29.0849	0.521454	-0.572174	0.483469	-1.53397	1.1033	-0.735253
Rv1333	Probable hydrolase	Function unknown; probably involved in cellular metabolism	P9WM23	Rv1333	Mb1368	intermediary metabolism and respiration	33.952	4	18.9	0	96.846	22.7424	24.2219	24.2488	22.8991	22.5156	24.9077	24.4689	23.392	24.6968	24.076	23.8672	24.5696	0.330674	-0.433217	0.40127	-0.730136	0.0109067	0.014986
Rv1339	Conserved protein	Function unknown	P9WGC1	Rv1339	Mb1374	conserved hypotheticals	29.154	14	81.7	0	127.14	28.315	28.4419	28.6253	28.1443	29.058	28.2869	28.571	27.972	27.7138	28.674	27.4497	27.5952	0.629688	0.55442	0.544153	0.590082	0.143979	0.179277
fabG2	Probable 3-oxoacyl-[acyl-carrier protein] reductase FabG2 (3-ketoacyl-acyl carrier protein reductase)	Involved in the fatty acid biosynthesis pathway (first reduction step) [catalytic activity: (3R)-3-hydroxyacyl-[acyl-carrier protein] + NADP+ = 3-oxoacyl-[acyl-carrier protein] + NADPH].	P9WGR9	Rv1350	Mb1385	lipid metabolism	25.871	10	51	0	27.061	25.076	25.4837	23.133	25.3079	24.4434	24.8336	25.6744	22.8358	25.0339	24.6008	25.3899	25.3262	0.284171	-0.541399	0.275392	-0.244015	0.263125	-0.590964
Rv1377c	Putative transferase	Function unknown; probably involved in cellular metabolism	P71805	Rv1377c	Mb1412c	intermediary metabolism and respiration	22.815	11	62.7	0	69.827	27.2121	27.2525	26.9345	27.0348	27.4147	26.8943	27.1717	27.0681	26.8287	27.5437	26.7379	27.0392	0.0345558	0.0261059	0.00898911	0.0076987	0.119673	-0.0840715
bkdB	Probable branched-chain keto acid dehydrogenase E1 component, beta subunit BkdB	Involved in energy metabolism. The branched-chain alpha-keto acid dehydrogenase complex catalyzes the overall conversion of branched chain alpha-keto acids to acyl-CoA and CO2. It contains multiple copies of three enzymatic components: branched-chain alpha-keto acid decarboxylase (E1), lipoamide acyltransferase (E2) and lipoamide dehydrogenase (E3).	P9WIS1	Rv2496c	Mb2524c	intermediary metabolism and respiration	38.064	15	79.6	0	157.48	29.6174	29.4055	29.2879	29.5756	29.5503	29.2861	29.1027	29.4534	28.771	29.1234	29.4195	29.3988	0.381173	0.123018	0.517494	0.156766	0.395415	-0.20487
accA1	Probable acetyl-/propionyl-coenzyme A carboxylase alpha chain (alpha subunit) AccA1: biotin carboxylase + biotin carboxyl carrier protein (BCCP)	This protein carries two functions: biotin carboxyl carrier protein and biotin carboxyltransferase. Involved in the first step of long-chain fatty acid synthesis [catalytic activity: ATP + biotin-carboxyl-carrier protein + CO(2) = ADP + phosphate + carboxybiotin-carboxyl-carrier protein].	P9WPQ3	Rv2501c	Mb2529c	lipid metabolism	70.591	12	26.5	0	28.364	25.6409	25.8525	25.4988	24.6475	24.9497	25.4824	25.7584	25.5076	25.512	24.2115	25.6882	25.5923	0.439578	0.500061	0.0914165	-0.137477	0.370579	0.428668
carB	Probable carbamoyl-phosphate synthase large chain CarB (carbamoyl-phosphate synthetase ammonia chain)	Involved in both arginine and pyrimidine biosynthesis [catalytic activity: 2 ATP + L-glutamine + CO(2) + H(2)O = 2 ADP + phosphate + glutamate + carbamoyl phosphate.]	P9WPK3	Rv1384	Mb1419	intermediary metabolism and respiration	119.02	36	46.7	0	188.54	27.7863	26.9519	26.8491	27.4538	24.0817	27.7371	27.4985	26.49	27.0252	24.6695	27.357	27.774	0.229466	0.595626	0.0391985	-0.175942	0.148249	0.404387
bcp	Probable bacterioferritin comigratory protein Bcp	Putative antioxidant protein.	P9WIE1	Rv2521	Mb2550	virulence, detoxification, adaptation	17.077	8	75.8	0	55.226	27.3988	26.9779	27.017	27.0377	25.8024	26.9976	27.0549	26.6024	27.0387	26.5939	26.8482	27.1458	0.573456	0.268613	0.224347	-0.250065	0.0572503	0.036054
Rv2557	Conserved protein	Function unknown; thought to be involved in the persistence in the host.	P9WLA5	Rv2557	Mb2587	conserved hypotheticals	24.295	6	45.1	0	23.251	23.8459	23.9197	24.1538	24.3256	23.6249	24.1596	23.9295	23.9061	24.2646	24.2534	24.6494	24.0101	0.728578	-0.331144	0.402169	-0.267568	0.545958	-0.270878
Rv1428c	Conserved hypothetical protein	Function unknown	O06830	Rv1428c	Mb1463c	conserved hypotheticals	29.912	9	40.4	0	33.624	22.5868	23.9546	24.5266	23.8687	24.8786	23.2972	25.0722	24.5675	24.8634	24.6439	24.6106	23.7366	0.422166	-0.641036	0.224321	-0.315527	0.693108	0.503996
Rv2563	Probable glutamine-transport transmembrane protein ABC transporter	Thought to be involved in active transport of glutamine across the membrane (import). Responsible for the translocation of the substrate across the membrane.	P9WG15	Rv2563	Mb2592	cell wall and cell processes	36.025	14	52.7	0	302.91	25.6159	23.7322	24.0866	28.5286	24.6201	26.4271	23.3359	24.4302	23.7582	27.4499	23.257	25.8928	0.319491	-1.055	0.234026	0.992041	0.598743	-1.6918
aspS	Probable aspartyl-tRNA synthetase AspS (aspartate--tRNA ligase) (ASPRS) (aspartic acid translase)	Involved in translation mechanism [catalytic activity: ATP + L-aspartate + tRNA(asp) = AMP + pyrophosphate + L-aspartyl-tRNA(asp)].	P9WFW3	Rv2572c	Mb2602c	information pathways	64.98	18	39.4	0	61.831	26.7106	25.9826	25.7216	26.1892	23.7975	26.9608	26.422	23.6061	23.0937	24.2352	26.3468	26.8394	0.14431	0.331118	0.0433542	-0.157971	0.475661	-1.4332
pgl	Probable 6-phosphogluconolactonase DevB (6PGL)	Involved in pentose phosphate pathway. Hydrolysis of 6-phosphogluconolactone to 6- phosphogluconate. [catalytic activity: 6-phospho-D-glucono-1,5-lactone + H(2)O = 6- phospho-D-gluconate]	P9WQP5	Rv1445c	Mb1480c	intermediary metabolism and respiration	25.804	17	64.8	0	171.63	28.1163	28.2503	28.3024	28.3122	28.4857	28.1496	28.2996	28.4264	28.3355	28.5689	28.086	28.3156	0.26775	-0.100471	0.0148936	-0.0076402	0.0737231	0.0303516
Rv2585c	Possible conserved lipoprotein	Unknown	P9WL77	Rv2585c	Mb2616c	cell wall and cell processes	58.634	23	48.5	0	323.31	23.4053	22.9343	23.024	24.2256	23.922	24.0072	23.8729	24.862	24.3862	23.345	23.9419	24.1475	1.1566	-0.690297	0.394555	0.240152	0.684729	0.562239
fadD9	Probable fatty-acid-CoA ligase FadD9 (fatty-acid-CoA synthetase) (fatty-acid-CoA synthase)	Function unknown, but involved in lipid degradation.	Q50631	Rv2590	Mb2621	lipid metabolism	127.33	33	41.1	0	152.05	28.1015	28.0085	27.8386	27.5979	22.7448	27.8748	27.832	27.646	27.7051	24.9795	27.9178	27.7981	0.490545	1.08442	0.161388	-0.825945	0.359363	0.829222
Rv1462	Conserved hypothetical protein	Function unknown	P9WFP5	Rv1462	Mb1497	conserved hypotheticals	42.523	17	68	0	220.45	27.7284	27.5976	27.4414	27.9797	26.0177	27.633	27.3474	27.5014	27.4081	26.3417	27.7142	27.5936	0.345874	0.372651	0.00279193	-0.00638262	0.173912	0.202486
fadE15	Probable acyl-CoA dehydrogenase FadE15	Function unknown, but involvement in lipid degradation.	O53158	Rv1467c	Mb1502c	lipid metabolism	65.923	25	66.3	0	169.49	29.0896	29.4423	29.1395	28.8789	25.3879	29.2775	29.2428	29.2147	29.4915	27.3993	29.4381	28.9382	0.434131	0.631925	0.208756	-0.743769	0.512379	0.724475
Rv2619c	Conserved protein	Function unknown	O06194	Rv2619c	Mb2652c	conserved hypotheticals	12.322	4	47	0	135.71	26.9765	27.9663	27.5521	27.805	28.1793	26.9243	27.595	27.4909	27.4208	27.8078	26.8997	27.4447	0.10564	0.114246	0.21481	0.252148	0.165679	0.118167
echA12	Possible enoyl-CoA hydratase EchA12 (enoyl hydrase) (unsaturated acyl-CoA hydratase) (crotonase)	Could possibly oxidize fatty acids using specific components [catalytic activity: (3S)-3-hydroxyacyl-CoA = trans-2(or 3)-enoyl-CoA + H(2)O].	P9WNN7	Rv1472	Mb1507	lipid metabolism	30.575	16	64.6	0	151.47	27.9716	27.8099	27.7348	28.043	25.175	27.3072	28.0565	28.1775	27.7594	26.745	28.3495	27.7772	0.171229	0.214918	0.328422	-0.782136	0.314919	0.373931
Rv2624c	Universal stress protein family protein	Function unknown	P9WFD5	Rv2624c	Mb2657c	virulence, detoxification, adaptation	29.4	15	72.4	0	40.186	26.1455	24.9671	24.791	25.9256	24.3397	26.8978	26.0209	25.3434	26.706	25.3381	25.8858	26.687	0.506548	-0.669097	0.106812	-0.249264	0.0322853	0.0531247
Rv1476	Possible membrane protein	Unknown	O53167	Rv1476	Mb1512	cell wall and cell processes	19.601	8	59.7	0	156.35	22.8123	23.2812	23.4721	22.989	24.1459	23.2446	22.191	23.0381	23.4671	24.6972	23.4583	24.1333	1.04449	-0.907744	0.563662	-0.636441	1.08592	-1.19756
Rv2629	Conserved protein	Function unknown	P9WL63	Rv2629	Mb2662	conserved hypotheticals	40.839	14	56.4	0	56.403	25.8974	25.9399	23.8673	25.6999	23.6843	26.1082	26.0061	25.2159	26.3588	25.7368	22.9657	26.0575	0.0939895	0.314864	0.0691067	0.244172	0.380645	0.940314
Rv1488	Possible exported conserved protein	Function unknown	P9WPR9	Rv1488	Mb1524	cell wall and cell processes	41.282	22	63.5	0	323.31	28.7904	28.3225	28.6172	28.2796	28.4826	28.615	28.3168	28.2347	28.477	28.8819	28.6333	29.1714	0.702753	-0.318837	1.11834	-0.436478	1.49605	-0.552718
mutA	Probable methylmalonyl-CoA mutase small subunit MutA (MCM)	Involved in propionic acid fermentation. Catalyzes the isomerization of succinyl-CoA to methylmalonyl-CoA during synthesis of propionate from tricarboxylic acid-cycle intermediates [catalytic activity: (R)-2-methyl-3-oxopropanoyl-CoA = succinyl- CoA]	P9WJK7	Rv1492	Mb1529	lipid metabolism	64.744	27	65.9	0	306.48	29.4899	29.0078	29.1265	29.1916	25.3924	29.2294	29.0452	28.63	29.1098	28.4764	29.0585	29.1382	0.552726	0.317062	0.300256	-0.953194	0.0498873	0.037365
msrB	Probable peptide methionine sulfoxide reductase MsrB (protein-methionine-R-oxide reductase) (peptide met(O) reductase)	Has an important function as a repair enzyme for proteins that have been inactivated by oxidation. Catalyzes the reversible oxidation-reduction of methionine sulfoxide in proteins to methionine [catalytic activity: protein L-methionine + oxidized thioredoxin + H2O = protein-L-methionine-(R)-S-oxide + reduced thioredoxin]	I6YA00	Rv2674	Mb2693	intermediary metabolism and respiration	15.318	3	26.5	0	15.677	24.3572	24.2468	24.8628	24.6498	24.7851	22.5875	24.2507	24.9754	23.7161	24.9908	24.9054	24.7236	0.87094	-0.384283	0.533397	-0.865785	0.680867	-0.559202
Rv2680	Conserved protein	Function unknown	O86317	Rv2680	Mb2699	conserved hypotheticals	22.573	6	45.2	0	7.4341	25.6935	24.3216	25.9838	23.2409	23.3425	24.4566	24.0186	23.8226	23.1603	24.0148	24.3131	24.468	0.943091	1.06767	0.642101	-0.585297	0.959942	-0.598154
ceoB	TRK system potassium uptake protein CeoB	Part of a potassium transport system.	I6XF25	Rv2691	Mb2710	cell wall and cell processes	24.209	16	81.1	0	221.05	28.2649	27.4579	28.0408	28.287	27.5857	28.1314	28.4742	27.6257	27.8181	28.0541	27.6994	28.4359	0.166736	-0.141973	0.0719538	-0.0617574	0.0971592	-0.0904891
Rv1533	Conserved protein	Unknown	O06179	Rv1533	Mb1560	conserved hypotheticals	39.62	14	54.9	0	177.57	28.5587	28.7324	28.4991	28.8225	25.5851	28.5889	28.3982	28.6206	28.7883	27.529	28.4386	28.6523	0.48253	0.390094	0.188487	-0.541119	0.473327	0.395721
Rv2696c	Conserved alanine and glycine and valine rich protein	Function unknown	I6XF31	Rv2696c	Mb2715c	conserved hypotheticals	27.216	7	27	0	5.8281	24.1574	23.7259	24.4208	23.3954	24.6844	23.7479	23.5159	23.6131	23.0751	24.6032	24.077	23.2389	0.103629	0.128381	0.0183009	-0.0304406	0.593787	-0.57163
ansA	Probable L-aparaginase AnsA	Conversion of asparagine to aspartate [catalytic activity: L-asparagine + H(2)O = L-aspartate + NH(3).]	P9WPX5	Rv1538c	Mb1565c	intermediary metabolism and respiration	31.741	14	62.9	0	88.748	26.6796	26.7125	26.6684	27.1795	25.1915	27.0319	27.3116	27.305	27.2216	26.6744	26.6171	26.9554	0.231072	-0.0620817	0.163312	-0.281319	2.09149	0.530445
ppgK	Polyphosphate glucokinase PpgK (polyphosphate-glucose phosphotransferase)	Catalyzes the phosphorylation of glucose using polyphosphate or ATP as the phosphoryl donor. GTP, UTP and CTP can replace ATP as phosphoryl donor [catalytic activity: (phosphate)(N) + D-glucose = (phosphate)(N-1) + D-glucose 6-phosphate].	P9WIN1	Rv2702	Mb2721	intermediary metabolism and respiration	27.429	6	32.8	0	63.043	25.186	24.8043	24.7536	25.0089	25.443	25.396	25.1642	25.0567	25.2369	25.7347	23.7971	25.2647	0.00963692	-0.0175387	0.229008	0.350501	0.139151	0.220427
Rv2707	Probable conserved transmembrane alanine and leucine rich protein	Unknown	I6YE67	Rv2707	Mb2726	conserved hypotheticals	35.046	4	21.3	0	64.944	24.8289	24.9219	24.5017	24.0616	22.9902	23.8355	24.3915	24.3055	23.2775	23.8081	22.6666	23.4797	1.77537	1.4327	0.263771	0.310993	0.612868	0.673365
Rv2721c	Possible conserved transmembrane alanine and glycine rich protein	Unknown	I6XF52	Rv2721c	Mb2740c	cell wall and cell processes	72.371	33	63.7	0	323.31	26.3626	27.1403	27.3301	26.479	29.0769	28.0645	26.072	27.5942	26.9012	28.9221	26.882	27.0038	0.382348	-0.658297	0.0965299	0.270824	0.397896	-0.746848
Rv1556	Possible regulatory protein	Possibly involved in a transcriptional mechanism	P9WMD1	Rv1556	Mb1581	regulatory proteins	22.329	7	40.6	0	17.577	25.2433	23.6278	23.4673	23.405	23.2884	23.3687	24.012	25.5745	23.6529	23.4076	23.188	25.8303	0.00942882	-0.0291837	0.392517	-0.787923	0.0938349	0.271154
glgX	Probable maltooligosyltrehalose synthase TreX	Possibly involved in trehalose biosynthesis (protective effect). Mycobacteria can produce trehalose from glucose 6-phosphate and UDP-glucose (the OtsA-OtsB pathway) from glycogen-like alpha(1-->4)-linked glucose polymers (the TreY-TreZ pathway) and from maltose (the TreS pathway).	P9WQ25	Rv1564c	Mb1591c	virulence, detoxification, adaptation	81.08	23	44.4	0	233.16	28.1319	28.1596	27.7503	28.0054	26.8318	27.9218	28.0452	27.4918	28.0767	28.2196	27.8591	28.0334	0.0477657	-0.0234445	0.502864	-0.450998	0.313498	-0.166114
rnj	Conserved hypothetical protein	Function unknown	P9WGZ9	Rv2752c	Mb2773c	conserved hypotheticals	59.532	10	23.5	0	18.1	25.3975	23.797	25.2333	25.219	25.647	24.6973	24.5807	25.2578	25.4653	26.1266	24.8062	24.5261	0.185081	-0.343644	0.0205452	0.0348193	0.0310174	-0.0516618
bcpB	Probable peroxidoxin BcpB	Peroxide detoxification	P9WID9	Rv1608c	Mb1634c	virulence, detoxification, adaptation	16.894	8	54.5	0	114.43	26.6525	25.9678	26.546	26.2159	26.9717	26.6005	26.6695	26.7249	26.7609	26.8412	26.6351	26.8411	0.792531	-0.383664	0.315562	-0.176439	0.297428	-0.0540002
ribF	Probable bifunctional FAD synthetase/riboflavin biosynthesis protein RibF: riboflavin kinase (flavokinase) + FMN adenylyltransferase (FAD pyrophosphorylase) (FAD synthetase)(FAD diphosphorylase) (flavin adenine dinucleotide synthetase)	Involved in FAD biosynthesis [catalytic activity 1: ATP + riboflavin = ADP + FMN] [catalytic activity 2: ATP + FMN = diphosphate + FAD].	I6X5C9	Rv2786c	Mb2809c	intermediary metabolism and respiration	36.09	6	24.2	0	16.027	24.689	24.6558	24.3605	24.2424	24.7339	24.6846	24.0681	24.4215	24.8006	23.8336	25.2846	25.2841	0.178427	-0.23233	0.18559	-0.247108	0.282978	-0.370673
pdtaR	Probable two-component system transcriptional regulator	Sensor part of a two component regulatory system	P9WGM3	Rv1626	Mb1652	regulatory proteins	22.669	24	87.3	0	323.31	30.4505	30.2714	30.2708	30.577	30.9493	30.2804	30.5575	30.6544	30.3546	30.6726	30.3376	30.4347	0.578322	-0.150729	0.215406	0.120591	0.110162	0.0405146
TB15.3	Iron-regulated universal stress protein family protein TB15.3	Function unknown	P9WFC9	Rv1636	Mb1662	virulence, detoxification, adaptation	15.312	13	82.2	0	323.31	31.1253	31.2194	30.9431	31.0205	31.5778	30.7792	30.7292	30.9724	31.0739	31.3428	30.4528	30.9958	0.240359	0.16548	0.216693	0.195373	0.00618205	-0.00524775
infC	Probable initiation factor if-3 InfC	If-3 binds to the 30S ribosomal subunit and shifts the equilibrum between 70S ribosomes and their 50S and 30S subunits in favor of the free subunits, thus enhancing the availability of 30S subunits on which protein synthesis initiation begins.	P9WKJ9	Rv1641	Mb1668	information pathways	22.333	8	44.8	0	22.317	24.8558	23.263	23.494	25.4787	26.2343	25.1201	25.355	25.0189	23.8315	26.3114	24.9249	25.43	1.23399	-1.6845	0.0361089	0.055603	0.597157	-0.820331
pks10	Chalcone synthase Pks10	Possibly involved in the biosynthesis of secondary metabolites [catalytic activity: 3 malonyl-CoA + 4-coumaroyl-CoA = 4 CoA + naringenin chalcone + 3 CO2]	P9WPF5	Rv1660	Mb1688	lipid metabolism	37.145	10	48.7	0	69.032	25.6561	25.6769	25.9468	25.7655	26.3346	25.6598	25.4708	25.8625	25.81	25.7819	22.1474	25.6852	0.436562	1.22175	0.496824	1.38181	0.416585	1.17626
pks11	Chalcone synthase Pks11	Possibly involved in the biosynthesis of secondary metabolites [catalytic activity: 3 malonyl-CoA + 4-coumaroyl-CoA = 4 CoA + naringenin chalcone + 3 CO2]	P9WPF3	Rv1665	Mb1693	lipid metabolism	37.639	15	60.9	0	45.12	26.1824	26.0428	26.2602	26.6186	26.7363	26.1135	26.0715	26.4321	26.2548	26.8557	25.6014	26.3241	0.0955619	-0.0986144	0.217081	0.229107	0.0066108	-0.00761604
[truncated: 515 more rows]

## Sheet: All proteins membrane fraction
Gene name	Product	Function	Main Protein ID	ORF Number Mtb	ORF Number bovis	Functional Category	Mol. weight [kDa]	Unique peptides	Unique sequence coverage [%]	Q-value	Score	LFQ intensity Trehalose 1	LFQ intensity Trehalose 2	LFQ intensity Trehalose 3	LFQ intensity Mannotrehalose 1	LFQ intensity Mannotrehalose 2	LFQ intensity Mannotrehalose 3	LFQ intensity Lactotrehalose 1	LFQ intensity Lactotrehalose 2	LFQ intensity Lactotrehalose 3	LFQ intensity Control 1	LFQ intensity Control 2	LFQ intensity Control 3	Trehalose: -Log(P-value)	Trehalose: Difference	Mannotrehalose: -Log(P-value)	Mannotrehalose: Difference	Lactotrehalose: -Log(P-value)	Lactotrehalose: Difference
[truncated: 1,577 more rows]

[truncated: 2 more sheets: Significant proteins cytosolic, Significant proteins membrane]
